# Supplementary material
Source: PubMed Central journal article supplement (PMC3880618)

## Supporting Information

### Copper-Catalyzed Etherification of Arene C-H Bonds

James Roane and Olafs Daugulis\*

Department of Chemistry, University of Houston, Houston, TX 77204-5003

#### Table of Contents

|                                                                            |     |
|----------------------------------------------------------------------------|-----|
| <b>General Considerations</b> .....                                        | S2  |
| <b>Materials</b> .....                                                     | S2  |
| <b>Synthesis of Amides</b> .....                                           | S2  |
| <b>Optimization of Reaction Conditions</b> .....                           | S3  |
| <b>General Etherification Procedure Employing Phenols</b> .....            | S5  |
| <b>General Etherification Procedure Employing Aliphatic Alcohols</b> ..... | S14 |
| <b>General Etherification Procedure for Amides</b> .....                   | S20 |
| <b>Phenoxylation of Picolinamide</b> .....                                 | S27 |
| <b>Cleavage of Picolinamide Auxiliary</b> .....                            | S29 |
| <b>Cleavage of 8-Aminoquinoline Auxiliary</b> .....                        | S30 |
| <b>Control Experiment</b> .....                                            | S30 |
| <b>References</b> .....                                                    | S31 |
| <b>Spectral Data</b> .....                                                 | S32 |

## General Considerations:

Reactions were performed using standard glassware. Column chromatography was performed on 60Å silica gel (Dynamic Adsorbents Inc.). <sup>1</sup>H NMR, <sup>13</sup>C NMR, and <sup>19</sup>F NMR were recorded on JEOL EC-400 or JEOL EC-500 spectrometers using residual solvent peak as a reference. IR- spectra were obtained using a Perkin Elmer Spectrum 100 FT-IR spectrometer. Compounds for HRMS were analyzed by positive mode electrospray ionization (+ESI) using Agilent QTOF mass spectrometer in the Mass Spectrometry Facility (MSF) of the Department of Chemistry and Biochemistry of University of Texas-Austin. Analytical thin layer chromatography was performed on silica gel. All procedures were performed under ambient air unless otherwise noted.

## Materials:

The following chemicals were obtained from commercial sources and used without further purification:

8-Aminoquinoline, 3-trifluoromethylbenzoyl chloride, 4-*tert*-butyl phenol, copper (II) carbonate basic, potassium carbonate, dimethylformamide, 4-(methylmercapto)-phenol, 3-hydroxybenzotrifluoride, 3-chloro-4-methylphenol, ethyl 3-hydroxybenzoate, 4-bromophenol, 3-iodophenol, triethylamine, 3,4-dimethoxybenzoyl chloride, 2,2-bis(4-hydroxyphenyl)propane, 4-cyanobenzoyl chloride, thionyl chloride, potassium acetate, 4-trifluoromethylbenzoyl chloride, 4-nitrobenzoyl chloride, 2,2,2-trifluoroethanol, pyridine, oxygen, 1-aminonaphthalene, potassium phosphate tribasic, 2-picolinic acid, triphenyl phosphite, pyridine, carbitol, tetramethylguanidine, cyclopropanemethanol, cinchonine\*, allyl alcohol, cumylamine, ethyl chloroformate, (-)-ethyl L-lactate, isonicotinic acid.

\* - NMR of cinchonine revealed an impurity and therefore this chemical was recrystallized three times from toluene before use.

## Synthesis of Amides

The following amides were synthesized according to literature procedures: 3-(trifluoromethyl)-*N*-(quinolin-8-yl)benzamide, 4-cyano-*N*-(quinolin-8-yl)benzamide, 4-(trifluoromethyl)-*N*-(quinolin-8-yl)benzamide, 4-nitro-*N*-(quinolin-8-yl)benzamide, and *N*-(quinolin-8-yl)isonicotinamide.<sup>1,2</sup>

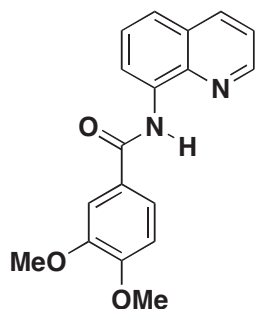

### 3,4-Dimethoxy-*N*-(quinolin-8-yl)benzamide

A 250 mL round bottom flask was equipped with a magnetic stirbar and charged with 8-aminoquinoline (2.39 g, 16.6 mmol), triethylamine (2.78 mL, 20 mmol), and CH<sub>2</sub>Cl<sub>2</sub> (150 mL). A vigreux condenser was attached to the flask and the stirring solution was purged with nitrogen for 10 minutes. After the mixture had been cooled in an ice-bath to 5 °C, 3,4-dimethoxybenzoyl chloride (4.01 g, 20 mmol) was added dropwise over 5 minutes. The reaction was stirred at 5 °C for one hour followed by heating to reflux for 16 hours. The reaction mixture was cooled to room temperature, concentrated by rotary evaporation, and dry-absorbed on SiO<sub>2</sub> (100 mL). Column chromatography on SiO<sub>2</sub> (500 mL) with toluene/ethyl acetate (30:1 to 10:1) gave the pure product as a light beige solid. R<sub>f</sub> = 0.23 (SiO<sub>2</sub>, toluene/ethyl acetate, 30:1). MP = 143 – 144 °C (from 6:1 hexanes/ethyl acetate). <sup>1</sup>H NMR (500 MHz, CDCl<sub>3</sub>, ppm) δ 10.67 (*s*, 1H) 8.89 (*dd*, *J* = 7.5 Hz, *J* = 1.2 Hz, 1H) 8.80 (*dd*, *J* = 4.0 Hz, *J* = 1.7 Hz, 1H) 8.13 (*dd*, *J* = 8.0 Hz, *J* = 1.2 Hz, 1H) 7.63 (*m*, 2H) 7.55 (*t*, *J* = 8.0 Hz, 1H) 7.48 (*d*, *J* = 8.6 Hz, 1H) 7.42 (*dd*, *J* = 8.0, *J* = 4.0 Hz, 1H) 6.95 (*d*, *J* = 8.0, 1H) 3.98 (*s*, 3H) 3.93 (*s*, 3H) <sup>13</sup>C NMR (100 MHz, CDCl<sub>3</sub>, ppm) δ 165.1, 152.1, 149.2, 148.3, 138.8, 136.5, 134.8, 128.1, 127.9, 127.6, 121.7, 121.5, 119.9, 116.4, 110.9, 110.5, 56.2. FT-IR (neat, cm<sup>-1</sup>) *v.* HRMS (+ESI): Calculated for C<sub>18</sub>H<sub>16</sub>N<sub>2</sub>O<sub>3</sub> [M+H]<sup>+</sup> 309.12340, Found 309.12320.

The following picoline amides were synthesized according to literature procedures. *N*-(2-phenylpropan-2-yl)picolinamide and *N*-(naphthalen-8-yl)picolinamide.<sup>3,4</sup>

### Optimization of Reaction Conditions

#### Entries 1-4

A 4-dram screw-cap vial was equipped with a magnetic stir bar and charged with 3-(trifluoromethyl)-*N*-(quinolin-8-yl)benzamide (0.032 g, 0.1 mmol), copper catalyst (0.1 mmol), and K<sub>2</sub>CO<sub>3</sub> (0.028 g, 0.2 mmol). The vial was flushed with N<sub>2</sub> and, inside the glovebox, NMO (0.023 g, 0.2 mmol) was added (entries 1-3 only). Outside the glovebox DMF (1 mL) was added and the resulting mixture was stirred at room temperature (20 °C) for 5 minutes. 4-*tert*-Butylphenol (0.030 g, 0.2 mmol) was added and the vial was allowed to stir for 5 minutes at room temperature. The vessel was then flushed with the appropriate gas, sealed (entries 1-3 only), and placed in a reaction block that had been pre-heated to 110 °C. After 12 hours the resulting dark-brown mixture was allowed to

cool to room temperature and dissolved in ethyl acetate (15 mL). The diluted solution was washed with de-ionized water (2x 10 mL), saturated sodium bicarbonate solution (10 mL), and brine (10 mL). The remaining organic portion was dried over sodium sulfate, filtered through a pad of Celite®, and concentrated under reduced pressure. After drying under vacuum for 12 hours 1,3,5-trimethoxybenzene (1.9 mg, 0.102 mmol) was added as an internal standard. The yield was determined using NMR spectroscopy by comparing the sums of the integrals for the amide N-H bond with the methoxy CH<sub>3</sub> of the internal standard.

### Entry 5

A 4-dram screw-cap vial was equipped with a magnetic stir bar and charged with 3-(trifluoromethyl)-*N*-(quinolin-8-yl)benzamide (0.158 g, 0.5 mmol), Cu(OPiv)<sub>2</sub> (0.027 g, 0.1 mmol), and Rb<sub>2</sub>CO<sub>3</sub> (0.231 g, 1.0 mmol). The vial was flushed with N<sub>2</sub> and, inside the glovebox, NMO (0.117 g, 1.0 mmol) was added. Outside the glovebox DMF (2.5 mL) was added and the resulting mixture was stirred at room temperature (20 °C) for 5 minutes. 4-*tert*-Butylphenol (0.030 g, 0.2 mmol) was added and the vial was allowed to stir for 5 minutes at room temperature. After flushing with air, the vial was placed in a reaction block that had been pre-heated to 110 °C for 12 hours. The resulting dark-brown mixture was allowed to cool to room temperature and dissolved in ethyl acetate (15 mL). The diluted solution was washed with de-ionized water (2x 10 mL), saturated sodium bicarbonate solution (10 mL), and brine (10 mL). The remaining organic portion was dried over sodium sulfate, filtered through a pad of Celite®, and concentrated under reduced pressure. The resulting residue was absorbed on SiO<sub>2</sub> and subjected to column chromatography to obtain 0.149 g (64%) of the pure product.

### Entry 6

A 10 mL round-bottom flask was equipped with a magnetic stir bar and charged with 3-(trifluoromethyl)-*N*-(quinolin-8-yl)benzamide (0.158 g, 0.5 mmol), Cu(OPiv)<sub>2</sub> (0.027 g, 0.1 mmol), Rb<sub>2</sub>CO<sub>3</sub> (0.231 g, 1.0 mmol), and DMF (2.5 mL). The resulting mixture was stirred at room temperature (20 °C) for 5 minutes followed by addition of 4-*tert*-butylphenol (0.075 g, 0.5 mmol) and stirring for an additional 5 minutes. The flask was then equipped with a reflux condenser and placed in an oil-bath that had been pre-heated to 110 °C. After 12 hours the resulting dark-brown mixture was allowed to cool to room temperature and dissolved in ethyl acetate (25 mL). The diluted solution was washed with deionized water (2x 15 mL), saturated sodium bicarbonate solution (15 mL), and brine (15 mL). The remaining organic portion was dried over sodium sulfate, filtered, and concentrated under reduced pressure. The resulting residue was absorbed on SiO<sub>2</sub> and subjected to column chromatography to obtain 0.169 g (73%) of the pure product.

### Entry 7

Refer to procedure for **Table 2, Entry 1**.

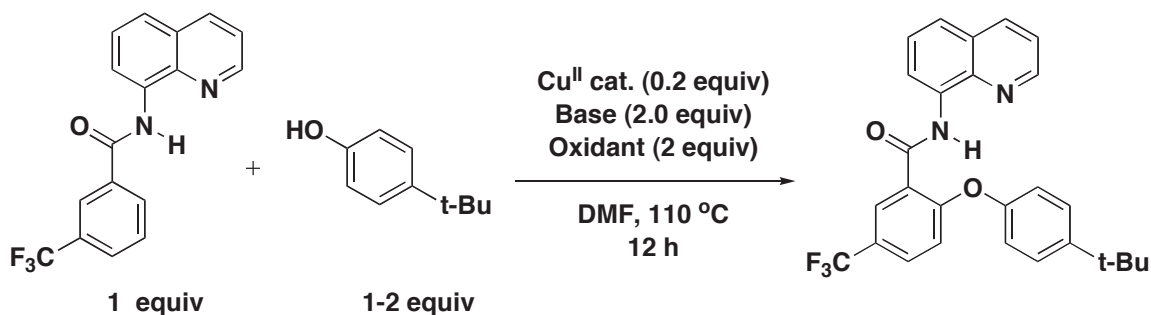

| Entry | Cu Catalyst                                                 | Oxidant                                  | Additive                               | Base                                  | Time | Yield |
|-------|-------------------------------------------------------------|------------------------------------------|----------------------------------------|---------------------------------------|------|-------|
| 1     | $\text{Cu}(\text{OAc})_2$<br>(.2 equiv)                     | NMO<br>(2 equiv)<br>Under Air            | $\text{Ag}_2\text{CO}_3$<br>(.2 equiv) | -                                     | 12 h | 21%*  |
| 2     | $\text{Cu}(\text{OAc})_2$<br>(.2 equiv)                     | NMO<br>(2 equiv)<br>Under $\text{N}_2$   | -                                      | $\text{K}_2\text{CO}_3$<br>(2 equiv)  | 12 h | 64%*  |
| 3     | $\text{Cu}(\text{OAc})_2$<br>(.2 equiv)                     | NMO<br>(2 equiv)<br>$\text{O}_2$ (1 atm) | -                                      | $\text{K}_2\text{CO}_3$<br>(2 equiv)  | 12 h | 67%*  |
| 4     | $\text{CuCO}_3 \cdot \text{Cu}(\text{OH})_2$<br>(.11 equiv) | Open Air                                 | -                                      | $\text{K}_2\text{CO}_3$<br>(2 equiv)  | 12 h | 68%*  |
| 5     | $\text{Cu}(\text{OPiv})_2$<br>(.2 equiv)                    | NMO<br>(2 equiv)                         | -                                      | $\text{Rb}_2\text{CO}_3$<br>(2 equiv) | 12 h | 64%   |
| 6     | $\text{Cu}(\text{OPiv})_2$<br>(.2 equiv)                    | NMO<br>(2 equiv)<br>Open Air             | -                                      | $\text{Rb}_2\text{CO}_3$<br>(2 equiv) | 12 h | 73%   |
| 7     | $\text{CuCO}_3 \cdot \text{Cu}(\text{OH})_2$<br>(.11 equiv) | Open Air                                 | -                                      | $\text{K}_2\text{CO}_3$<br>(2 equiv)  | 6 h  | 88%   |

\* - yields determined by NMR spectroscopy.

### General Etherification Procedure Employing Phenols

A 10 mL round-bottom flask was equipped with a magnetic stir bar and charged with amide (0.5 mmol),  $\text{CuCO}_3 \cdot \text{Cu}(\text{OH})_2$  (0.054 mmol, 0.12 equiv),  $\text{K}_2\text{CO}_3$  (1.0 mmol, 2.0 equiv), and DMF (2.5 mL). The resulting mixture was stirred at room temperature (20 °C) for 5 minutes followed by addition of phenol (0.5 mmol, 1.0 equiv) and stirring for an additional 5 minutes. The flask was then equipped with a reflux condenser and placed in an oil-bath that had been pre-heated to 110 °C. The reaction was monitored by TLC analysis at regular intervals and removed from the oil bath only after the starting amide was no longer visible. The resulting dark-brown mixture was allowed to cool to room temperature and dissolved in ethyl acetate (25 mL). The diluted solution was washed with deionized water (2× 15 mL), saturated sodium bicarbonate solution (15 mL), and brine (15 mL). The remaining organic portion was dried over sodium sulfate, filtered, and concentrated under reduced pressure. The resulting residue was absorbed on  $\text{SiO}_2$  and subjected to column chromatography to obtain the pure product.

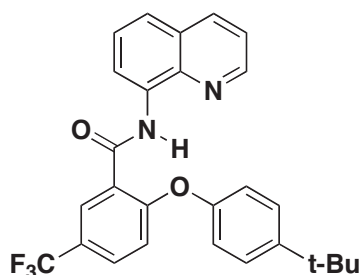

**2-(4-*tert*-Butylphenoxy)-5-(trifluoromethyl)-*N*-(quinolin-8-yl)benzamide (Table 2, Entry 1)**

A 10 mL round-bottom flask was equipped with a magnetic stir bar and charged with 3-(trifluoromethyl)-*N*-(quinolin-8-yl)benzamide (0.158 g, 0.5 mmol),  $\text{CuCO}_3 \cdot \text{Cu}(\text{OH})_2$  (0.012 g, 0.054 mmol),  $\text{K}_2\text{CO}_3$  (0.138 g, 1.0 mmol), and DMF (2.5 mL). The resulting mixture was stirred at room temperature (20 °C) for 5 minutes followed by addition of 4-*tert*-butylphenol (0.075 g, 0.5 mmol) and stirring for an additional 5 minutes at room temperature. The flask was then equipped with a reflux condenser and placed in an oil-bath that had been pre-heated to 110 °C. The reaction was monitored by TLC analysis at regular intervals and removed from the oil bath after full consumption of the amide starting material (6 hours). The resulting dark-brown mixture was allowed to cool to room temperature and dissolved in ethyl acetate (25 mL). The diluted solution was washed with de-ionized water (2× 15 mL), saturated sodium bicarbonate solution (15 mL), and brine (15 mL). The remaining organic portion was dried over sodium sulfate, filtered, and concentrated under reduced pressure. The resulting residue was absorbed on  $\text{SiO}_2$  (10 mL) and subjected to column chromatography on  $\text{SiO}_2$  (150 mL) with toluene (100%) to obtain 0.204 g (88%) the pure product as a white solid.  $R_f = 0.29$  ( $\text{SiO}_2$ , hexanes/ethyl acetate, 10:1). MP = 165 – 166 °C (from 6:1 hexanes/ethyl acetate).  $^1\text{H}$  NMR (500 MHz,  $\text{CDCl}_3$ , ppm)  $\delta$  112.29 (*s*, 1H) 8.99 (*dd*,  $J = 7.5$  Hz,  $J = 1.2$  Hz, 1H) 8.70 (*d*,  $J = 2.3$  Hz, 1H) 8.56 (*dd*,  $J = 4.0$  Hz,  $J = 1.7$  Hz, 1H) 8.13 (*dd*,  $J = 8.0$  Hz,  $J = 1.7$  Hz, 1H) 7.65 (*dd*,  $J = 9.2$  Hz,  $J = 2.3$  Hz, 1H) 7.59 (*t*,  $J = 8.0$  Hz, 1H) 7.52 (*dd*,  $J = 8.0$  Hz,  $J = 1.2$  Hz, 1H) 7.49 (*dt*,  $J = 9.2$  Hz,  $J = 2.3$  Hz, 2H) 7.39 (*dd*,  $J = 8.6$  Hz,  $J = 4.0$  Hz, 1H) 7.23 (*dt*,  $J = 8.6$  Hz,  $J = 1.7$  Hz, 2H) 7.09 (*d*,  $J = 8.6$  Hz, 1H) 1.37 (*s*, 9H)  $^{13}\text{C}$  NMR (100 MHz,  $\text{CDCl}_3$ , ppm)  $\delta$  161.9, 158.6, 152.2, 148.5, 148.3, 139.2, 136.2, 135.3, 130.3, 129.7, 128.1, 127.6, 127.2, 125.4 (*q*,  $J_{\text{C-F}} = 32.9$  Hz), 124.6, 124.0 (*q*,  $J_{\text{C-F}} = 271.0$  Hz), 122.1, 121.7, 119.9, 117.5, 117.4, 34.7, 31.6.  $^{19}\text{F}$  NMR (470 MHz,  $\text{CDCl}_3$ , ppm)  $\delta$  -61.9. FT-IR (neat,  $\text{cm}^{-1}$ )  $\nu$  1666, 1541, 1490, 1327, 1270, 1242, 1166, 1115. HRMS (+ESI): Calculated for  $\text{C}_{27}\text{H}_{24}\text{F}_3\text{N}_2\text{O}_2$  [ $\text{M}+\text{H}$ ] $^+$  465.17840, Found 465.17850.

**Large Scale Synthesis**

A 100 mL round-bottom flask was equipped with a magnetic stir bar and charged with 3-(trifluoromethyl)-*N*-(quinolin-8-yl)benzamide (1.01 g, 3.2 mmol),  $\text{CuCO}_3 \cdot \text{Cu}(\text{OH})_2$  (0.040 g, 0.19 mmol),  $\text{K}_2\text{CO}_3$  (0.88 g, 6.4 mmol), and DMF (16 mL). The resulting mixture was stirred at room temperature (20 °C) for 5 minutes followed by addition of 4-*tert*-butylphenol (0.48 g, 3.2 mmol) and stirring for an additional 5 minutes at room temperature. The flask was then equipped with a reflux condenser and placed in an oil-bath that had been pre-heated to 110 °C. The reaction was monitored by TLC analysis at

regular intervals and removed from the oil bath after full consumption of the amide starting material (10 hours). The resulting dark-brown mixture was allowed to cool to room temperature and dissolved in ethyl acetate (25 mL). The diluted solution was washed with de-ionized water (2×25 mL), saturated sodium bicarbonate solution (25 mL), and brine (25 mL). The remaining organic portion was dried over sodium sulfate, filtered, and concentrated under reduced pressure. The resulting residue was absorbed on SiO<sub>2</sub> (20 mL) and subjected to column chromatography on SiO<sub>2</sub> (400 mL) with toluene (100%) to obtain 1.08 g (73%) of the pure product as a white solid.

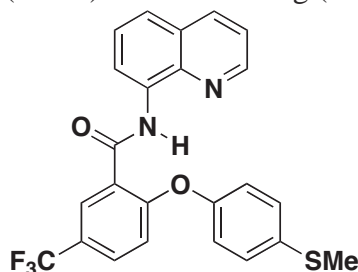

**2-(4-(Methylthio)phenoxy)-5-(trifluoromethyl)-N-(quinolin-8-yl)benzamide (Table 2, Entry 2)**

A 10 mL round-bottom flask was equipped with a magnetic stir bar and charged with 3-(trifluoromethyl)-*N*-(quinolin-8-yl)benzamide (0.158 g, 0.5 mmol), CuCO<sub>3</sub>•Cu(OH)<sub>2</sub> (0.012 g, 0.054 mmol), K<sub>2</sub>CO<sub>3</sub> (0.138 g, 1.0 mmol), and DMF (2.5 mL). The resulting mixture was stirred at room temperature (20 °C) for 5 minutes followed by addition of 4-methylthiophenol (0.070 g, 0.5 mmol) and stirring for an additional 5 minutes at room temperature. The flask was then equipped with a reflux condenser and placed in an oil-bath that had been pre-heated to 110 °C. The reaction was monitored by TLC analysis at regular intervals and removed from the oil bath after full consumption of the amide starting material (2.5 hours). The resulting dark-brown mixture was allowed to cool to room temperature and dissolved in ethyl acetate (25 mL). The diluted solution was washed with de-ionized water (2×15 mL), saturated sodium bicarbonate solution (15 mL), and brine (15 mL). The remaining organic portion was dried over sodium sulfate, filtered, and concentrated under reduced pressure. The resulting residue was absorbed on SiO<sub>2</sub> (10 mL) and subjected to column chromatography on SiO<sub>2</sub> (150 mL) with toluene (100%) to obtain 0.184 g (78%) of the pure product as a white solid. R<sub>f</sub> = 0.47 (SiO<sub>2</sub>, toluene/ethyl acetate, 30:1). MP =155 – 156 °C (from 6:1 hexanes/ethyl acetate). <sup>1</sup>H NMR (500 MHz, CDCl<sub>3</sub>, ppm) δ 12.25 (*s*, 1H) 8.97 (*d*, *J* = 8.0 Hz, 1H) 8.69 (*d*, *J* = 2.3 Hz, 1H) 8.52 (*dd*, *J* = 4.0 Hz, *J* = 1.7 Hz, 1H) 8.09 (*dd*, *J* = 8.6 Hz, *J* = 1.7 Hz, 1H) 7.64 (*dd*, *J* = 8.6 Hz, *J* = 1.72 Hz, 1H) 7.55 (*t*, *J* = 7.45 Hz, 1H) 7.49 (*dd*, *J* = 8.0 Hz, *J* = 1.2 Hz, 1H) 7.37 (*dt*, *J* = 9.2 Hz, *J* = 3.4 Hz, 2H) 7.35 (*d*, *J* = 4.0 Hz, 1H) 7.23 (*dt*, *J* = 9.2 Hz, *J* = 2.3 Hz, 2H) 7.04 (*d*, *J* = 8.6 Hz, 1H) 2.52 (*s*, 3H) <sup>13</sup>C NMR (100 MHz, CDCl<sub>3</sub>, ppm) δ 161.6, 158.2, 152.3, 148.3, 139.0, 136.2, 135.5, 135.1, 130.3, 129.7, 128.6, 128.0, 127.5, 125.6 (*q*, *J*<sub>C-F</sub> = 33.6 Hz), 124.6, 123.9 (*q*, *J*<sub>C-F</sub> = 272.3 Hz), 122.1, 121.7, 121.1, 117.4, 117.3 16.5 <sup>19</sup>F NMR (470 MHz, CDCl<sub>3</sub>, ppm) δ -61.9. FT-IR (neat, cm<sup>-1</sup>) ν 1667, 1542, 1487, 1328, 1268, 1245, 1110. HRMS (+ESI): Calculated for C<sub>24</sub>H<sub>18</sub>F<sub>3</sub>N<sub>2</sub>O<sub>2</sub>S [M+H]<sup>+</sup> 455.10360, Found 455.10350.

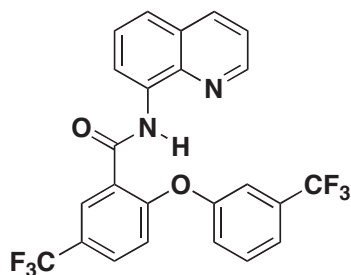

**2-(3-(Trifluoromethyl)phenoxy)-5-(trifluoromethyl)-N-(quinolin-8-yl)benzamide  
(Table 2, Entry 3)**

A 10 mL round-bottom flask was equipped with a magnetic stir bar and charged with 3-(trifluoromethyl)-*N*-(quinolin-8-yl)benzamide (0.158 g, 0.5 mmol),  $\text{CuCO}_3 \cdot \text{Cu}(\text{OH})_2$  (0.012 g, 0.054 mmol),  $\text{K}_2\text{CO}_3$  (0.138 g, 1.0 mmol), and DMF (2.5 mL). The resulting mixture was stirred at room temperature (20 °C) for 5 minutes followed by addition of 3-hydroxybenzotrifluoride (0.081 g, 0.5 mmol) and stirring for an additional 5 minutes at room temperature. The flask was then equipped with a reflux condenser and placed in an oil-bath that had been pre-heated to 110 °C. The reaction was monitored by TLC analysis at regular intervals and removed from the oil bath after full consumption of the amide starting material (6 hours). The resulting dark-brown mixture was allowed to cool to room temperature and dissolved in ethyl acetate (25 mL). The diluted solution was washed with de-ionized water (2×15 mL), saturated sodium bicarbonate solution (15 mL), and brine (15 mL). The remaining organic portion was dried over sodium sulfate, filtered, and concentrated under reduced pressure. The resulting residue was absorbed on  $\text{SiO}_2$  (10 mL) and subjected to column chromatography on  $\text{SiO}_2$  (150 mL) with toluene (100%) to obtain 0.132 g (55%) of the pure product as a white solid.  $R_f = 0.18$  ( $\text{SiO}_2$ , hexanes/ethyl acetate, 10:1). MP =150 – 151 °C (from 6:1 hexanes/ethyl acetate).  $^1\text{H}$  NMR (500 MHz,  $\text{CDCl}_3$ , ppm)  $\delta$  12.10 (*s*, 1H) 8.97 (*dd*,  $J = 7.5$  Hz,  $J = 1.2$  Hz, 1H) 8.72 (*d*,  $J = 1.7$  Hz, 1H) 8.54 (*dd*,  $J = 4.0$  Hz,  $J = 1.7$  Hz, 1H) 8.14 (*dd*,  $J = 8.0$  Hz,  $J = 1.2$ , 1H) 7.73 (*dd*,  $J = 8.6$  Hz,  $J = 2.3$  Hz, 1H), 7.67 (*brs*, 1H) 7.59 (*t*,  $J = 8.0$  Hz, 2H) 7.54 (*d*,  $J = 8.0$  Hz, 2H) 7.41 (*m*, 2H) 7.12 (*d*,  $J = 8.6$  Hz, 1H)  $^{13}\text{C}$  NMR (100 MHz,  $\text{CDCl}_3$ , ppm)  $\delta$  161.3, 156.9, 155.2, 148.2, 139.0, 136.4, 134.9, 133.0 (*q*,  $J_{\text{C-F}} = 34.8$  Hz), 130.9, 130.6, 130.0, 128.1, 127.6, 126.7 (*q*,  $J_{\text{C-F}} = 33.6$  Hz), 125.6, 124.8 (*q*,  $J_{\text{C-F}} = 273.1$  Hz), 124.6 (*q*,  $J_{\text{C-F}} = 273.1$  Hz), 122.9, 122.3, 121.9, 121.8, 118.2, 117.4. The signal for one carbon could not be located.  $^{19}\text{F}$  NMR (470 MHz,  $\text{CDCl}_3$ , ppm)  $\delta$  -62.1, -62.5. HRMS (+ESI): Calculated for  $\text{C}_{24}\text{H}_{15}\text{F}_6\text{N}_2\text{O}_2$   $[\text{M}+\text{H}]^+$  477.10320, Found 477.10300.



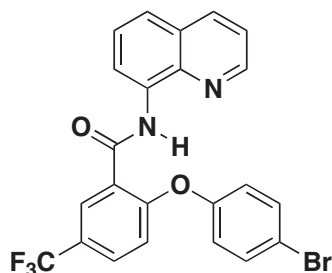

**2-(4-Bromophenoxy)-5-(trifluoromethyl)-N-(quinolin-8-yl)benzamide (Table 2, Entry 4)**

A 10 mL round-bottom flask was equipped with a magnetic stir bar and charged with 3-(trifluoromethyl)-N-(quinolin-8-yl)benzamide (0.158 g, 0.5 mmol),  $\text{CuCO}_3 \cdot \text{Cu}(\text{OH})_2$  (0.012 g, 0.054 mmol),  $\text{K}_2\text{CO}_3$  (0.138 g, 1.0 mmol), and DMF (2.5 mL). The resulting mixture was stirred at room temperature (20 °C) for 5 minutes followed by addition of 4-bromophenol (0.087 g, 0.5 mmol) and stirring for an additional 5 minutes at room temperature. The flask was then equipped with a reflux condenser and placed in an oil-bath that had been pre-heated to 110 °C. The reaction was monitored by TLC analysis at regular intervals and removed from the oil bath after full consumption of the amide starting material (2 hours). The resulting dark-brown mixture was allowed to cool to room temperature and dissolved in ethyl acetate (25 mL). The diluted solution was washed with de-ionized water (2×15 mL), saturated sodium bicarbonate solution (15 mL), and brine (15 mL). The remaining organic portion was dried over sodium sulfate, filtered, and concentrated under reduced pressure. The resulting residue was absorbed on  $\text{SiO}_2$  (10 mL) and subjected to column chromatography on  $\text{SiO}_2$  (150 mL) with toluene (100%) to obtain 0.190 g (78%) of the pure product as a white solid.  $R_f = 0.25$  ( $\text{SiO}_2$ , hexanes/ethyl acetate, 10:1). MP = 196 – 197 °C (from 6:1 hexanes/ethyl acetate).  $^1\text{H}$  NMR (500 MHz,  $\text{CDCl}_3$ , ppm)  $\delta$  12.14 (s, 1H) 8.96 (d,  $J = 7.5$  Hz, 1H) 8.69 (d,  $J = 1.7$  Hz, 1H) 8.52 (dd,  $J = 4.0$  Hz,  $J = 1.2$  Hz, 1H) 8.11 (dd,  $J = 8.6$  Hz,  $J = 1.2$  Hz, 1H) 7.67 (dd,  $J = 8.6$  Hz,  $J = 2.3$  Hz, 1H) 7.59 (d,  $J = 8.6$  Hz, 2H) 7.56 (d,  $J = 7.5$  Hz, 1H) 7.51 (d,  $J = 7.5$  Hz, 1H) 7.38 (dd,  $J = 8.0$  Hz,  $J = 3.7$  Hz, 1H) 7.18 (d,  $J = 9.2$  Hz, 2H) 7.05 (d,  $J = 8.6$  Hz, 1H)  $^{13}\text{C}$  NMR (100 MHz,  $\text{CDCl}_3$ , ppm)  $\delta$  161.4, 157.6, 154.0, 148.3, 139.0, 136.3, 135.0, 133.4, 130.4, 129.8, 128.0, 127.6, 126.2 ( $q$ ,  $J_{\text{C-F}} = 33.6$  Hz), 125.1, 123.8 ( $q$ ,  $J_{\text{C-F}} = 271.1$  Hz), 122.2, 122.0, 121.7, 118.3, 117.8, 117.4  $^{19}\text{F}$  NMR (470 MHz,  $\text{CDCl}_3$ , ppm)  $\delta$  -61.9. FT-IR (neat,  $\text{cm}^{-1}$ )  $\nu$  1668, 1543, 1480, 1336, 1329, 1270, 1248, 1107. HRMS (+ESI): Calculated for  $\text{C}_{23}\text{H}_{15}\text{BrF}_3\text{N}_2\text{O}_2$   $[\text{M}+\text{H}]^+$  489.02430, Found 489.02460.

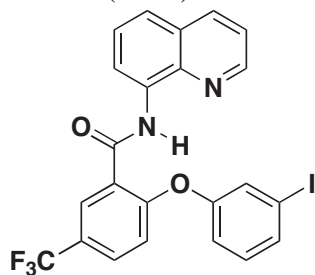

**2-(3-Iodophenoxy)-5-(trifluoromethyl)-N-(quinolin-8-yl)benzamide (Table 2, Entry 5)**

A 10 mL round-bottom flask was equipped with a magnetic stir bar and charged with 3-(trifluoromethyl)-N-(quinolin-8-yl)benzamide (0.158 g, 0.5 mmol),  $\text{CuCO}_3 \cdot \text{Cu}(\text{OH})_2$

(0.012 g, 0.054 mmol), K<sub>2</sub>CO<sub>3</sub> (0.138 g, 1.0 mmol), and DMF (2.5 mL). The resulting mixture was stirred at room temperature (20 °C) for 5 minutes followed by addition of 3-iodophenol (0.110 g, 0.5 mmol) and stirring for an additional 5 minutes at room temperature. The flask was then equipped with a reflux condenser and placed in an oil-bath that had been pre-heated to 110 °C. The reaction was monitored by TLC analysis at regular intervals and removed from the oil bath after full consumption of the amide starting material (2 hours). The resulting dark-brown mixture was allowed to cool to room temperature and dissolved in ethyl acetate (25 mL). The diluted solution was washed with de-ionized water (2×15 mL), saturated sodium bicarbonate solution (15 mL), and brine (15 mL). The remaining organic portion was dried over sodium sulfate, filtered, and concentrated under reduced pressure. The resulting residue was absorbed on SiO<sub>2</sub> (10 mL) and subjected to column chromatography on SiO<sub>2</sub> (150 mL) with toluene (100%) to obtain 0.148 g (56%) of the pure product as a light yellow solid. R<sub>f</sub> = 0.23 (SiO<sub>2</sub>, hexanes/ethyl acetate, 10:1). MP = 160 – 161 °C (from 6:1 hexanes/ethyl acetate). <sup>1</sup>H NMR (500 MHz, CDCl<sub>3</sub>, ppm) δ 12.12 (*s*, 1H) 8.96 (*dd*, *J* = 7.5 Hz, *J* = 1.2 Hz, 1H) 8.70 (*d*, *J* = 2.3 Hz, 1H) 8.59 (*dd*, *J* = 4.6 Hz, *J* = 1.7 Hz, 1H) 8.13 (*dd*, *J* = 8.6 Hz, *J* = 1.7 Hz, 1H) 7.74 (*t*, *J* = 1.7 Hz, 1H) 7.70 (*dd*, *J* = 8.6 Hz, *J* = 2.3 Hz, 1H) 7.62 (*dt*, *J* = 8.0 Hz, *J* = 1.2 Hz, 1H) 7.58 (*t*, *J* = 8.0 Hz, 1H) 7.53 (*dd*, *J* = 8.0 Hz, *J* = 1.2 Hz, 1H) 7.41 (*dd*, *J* = 8.0 Hz, *J* = 4.0 Hz, 1H) 7.24 (*ddd*, *J* = 8.6 Hz, *J* = 2.3 Hz, *J* = 1.2 Hz, 1H) 7.18 (*t*, *J* = 8.0 Hz, 1H) 7.11 (*d*, *J* = 8.6 Hz, 1H) <sup>13</sup>C NMR (100 MHz, CDCl<sub>3</sub>, ppm) δ 161.4, 157.2, 155.3, 148.4, 139.0, 136.3 135.0, 134.4, 131.5, 130.4, 129.9, 129.5, 128.1, 127.6, 126.4 (*q*, *J*<sub>C-F</sub> = 33.6 Hz), 125.2, 123.8 (*q*, *J*<sub>C-F</sub> = 271.1 Hz) 122.2, 121.8, 119.2, 118.2, 117.4, 94.5. <sup>19</sup>F NMR (470 MHz, CDCl<sub>3</sub>, ppm) δ -62.0. FT-IR (neat, cm<sup>-1</sup>) ν 1667, 1543, 1327, 1055, 1033, 1012. HRMS (+ESI): Calculated for C<sub>23</sub>H<sub>15</sub>F<sub>3</sub>N<sub>2</sub>O<sub>2</sub>I [M+H]<sup>+</sup> 535.01250, Found 535.01240.

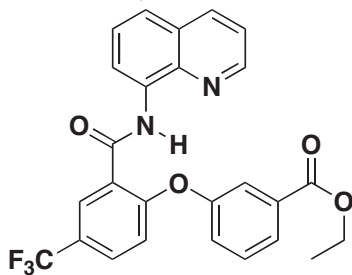

**Ethyl 3-(2-(quinolin-8-ylcarbamoyl)-4-(trifluoromethyl)phenoxy)benzoate (Table 2, Entry 6)**

A 10 mL round-bottom flask was equipped with a magnetic stir bar and charged with 3-(trifluoromethyl)-*N*-(quinolin-8-yl)benzamide (0.158 g, 0.5 mmol), CuCO<sub>3</sub>•Cu(OH)<sub>2</sub> (0.012 g, 0.054 mmol), K<sub>2</sub>CO<sub>3</sub> (0.138 g, 1.0 mmol), and DMF (2.5 mL). The resulting mixture was stirred at room temperature (20 °C) for 5 minutes followed by addition of ethyl 3-hydroxybenzoate (0.083 g, 0.5 mmol) and stirring for an additional 5 minutes at room temperature. The flask was then equipped with a reflux condenser and placed in an oil-bath that had been pre-heated to 110 °C. The reaction was monitored by TLC analysis at regular intervals and removed from the oil bath after full consumption of the amide starting material (2.5 hours). The resulting dark-brown mixture was allowed to cool to room temperature and dissolved in ethyl acetate (25 mL). The diluted solution was washed with de-ionized water (2×15 mL), saturated sodium bicarbonate solution (15

mL), and brine (15 mL). The remaining organic portion was dried over sodium sulfate, filtered, and concentrated under reduced pressure. The resulting residue was absorbed on SiO<sub>2</sub> (10 mL) and subjected to column chromatography on SiO<sub>2</sub> (150 mL) with toluene (100%) to obtain 0.202 g (84%) of the pure product as a light pink solid. *R*<sub>f</sub> = 0.35 (SiO<sub>2</sub>, toluene 100%). MP 128 – 129 °C (from 6:1 hexanes/ethyl acetate). <sup>1</sup>H NMR (500 MHz, CDCl<sub>3</sub>, ppm) δ 12.22 (*s*, 1H) 8.97 (*dd*, *J* = 7.5 Hz, *J* = 1.2 Hz, 1H) 8.72 (*d*, *J* = 2.3 Hz, 1H) 8.58 (*dd*, *J* = 4.0 Hz, *J* = 1.2 Hz, 1H) 8.11 (*dd*, *J* = 8.0 Hz, *J* = 1.7 Hz, 1H) 8.05 (*t*, *J* = 1.7 Hz, 1H) 7.97 (*d*, *J* = 7.5 Hz, 1H) 7.69 (*dd*, *J* = 8.6 Hz, *J* = 2.3 Hz, 1H) 7.57 (*t*, *J* = 8.0 Hz, 1H) 7.55 (*t*, *J* = 8.0 Hz, 1H) 7.52 (*dd*, *J* = 8.0 Hz, *J* = 1.2 Hz, 1H) 7.47 (*dd*, *J* = 8.0 Hz, *J* = 1.7 Hz, 1H) 7.38 (*dd*, *J* = 8.6 Hz, *J* = 4.0 Hz, 1H) 7.09 (*d*, *J* = 8.6 Hz, 1H) 4.41 (*q*, *J* = 7.5 Hz, 2H) 1.41 (*t*, *J* = 6.9 Hz, 3H) <sup>13</sup>C NMR (100 MHz, CDCl<sub>3</sub>, ppm) δ 165.7, 161.5, 157.5, 154.8, 148.4, 139.1, 136.3, 135.1, 133.0, 130.5, 130.3, 129.9, 128.0, 127.6, 126.5, 126.2 (*q*, *J*<sub>C-F</sub> = 33.6 Hz), 125.5, 124.3, 123.8 (*q*, *J*<sub>C-F</sub> = 272.3 Hz) 122.2, 121.7, 121.4, 117.9, 117.4, 61.6, 14.4. <sup>19</sup>F NMR (470 MHz, CDCl<sub>3</sub>, ppm) δ -62.0. FT-IR (neat, cm<sup>-1</sup>) ν 1722, 1671, 1544, 1330, 1271, 1171, 1110. HRMS (+ESI): Calculated for C<sub>26</sub>H<sub>20</sub>F<sub>3</sub>N<sub>2</sub>O<sub>4</sub> [M+H]<sup>+</sup> 481.13750, Found 481.13750.

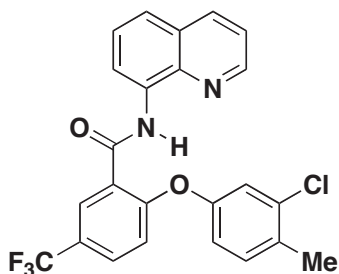

**2-(3-Chloro-4-methylphenoxy)-5-(trifluoromethyl)-N-(quinolin-8-yl)benzamide**  
(Table 2, Entry 7)

A 10 mL round-bottom flask was equipped with a magnetic stir bar and charged with 3-(trifluoromethyl)-N-(quinolin-8-yl)benzamide (0.158 g, 0.5 mmol), CuCO<sub>3</sub>•Cu(OH)<sub>2</sub> (0.012 g, 0.054 mmol), K<sub>2</sub>CO<sub>3</sub> (0.138 g, 1.0 mmol), and DMF (2.5 mL). The resulting mixture was stirred at room temperature (20 °C) for 5 minutes followed by addition of 3-chloro-4-methylphenol (0.071 g, 0.5 mmol) and stirring for an additional 5 minutes at room temperature. The flask was then equipped with a reflux condenser and placed in an oil-bath that had been pre-heated to 110 °C. The reaction was monitored by TLC analysis at regular intervals and removed from the oil bath after full consumption of the amide starting material (2.5 hours). The resulting dark-brown mixture was allowed to cool to room temperature and dissolved in ethyl acetate (25 mL). The diluted solution was washed with de-ionized water (2×15 mL), saturated sodium bicarbonate solution (15 mL), and brine (15 mL). The remaining organic portion was dried over sodium sulfate, filtered, and concentrated under reduced pressure. The resulting residue was absorbed on SiO<sub>2</sub> (10 mL) and subjected to column chromatography on SiO<sub>2</sub> (150 mL) with toluene (100%) to obtain 0.177 g (77%) of the pure product as a white solid. *R*<sub>f</sub> = 0.40 (SiO<sub>2</sub>, toluene 100%). MP = 163 – 164 °C (from 6:1 hexanes/ethyl acetate). <sup>1</sup>H NMR (500 MHz, CDCl<sub>3</sub>, ppm) δ 12.17 (*s*, 1H) 8.97 (*dd*, *J* = 7.45 Hz, *J* = 1.2 Hz, 1H) 8.70 (*d*, *J* = 2.3 Hz, 1H) 8.58 (*dd*, *J* = 4.6 Hz, *J* = 1.7 Hz, 1H) 8.11 (*dd*, *J* = 8.0 Hz, *J* = 1.7 Hz, 1H) 7.67 (*dd*, *J* = 8.6 Hz, *J* = 2.3 Hz, 1H) 7.57 (*t*, *J* = 7.6 Hz, 1H) 7.51 (*dd*, *J* = 8.0, *J* = 1.2 Hz, 1H)

7.39 (*t*, *J* = 5.7 Hz, 1H) 7.39 (*d*, *J* = 4.0 Hz, 1H) 7.31 (*d*, *J* = 8.6 Hz, 1H) 7.09 (*d*, *J* = 8.6 Hz, 1H) 7.08 (*d*, *J* = 8.0 Hz, 1H) 2.41 (*s*, 3H) <sup>13</sup>C NMR (100 MHz, CDCl<sub>3</sub>, ppm) δ 161.5, 157.7, 153.1, 148.4, 139.1, 136.3, 135.4, 135.1, 133.3, 132.0, 130.4 129.8, 128.0, 127.6, 126.0 (*q*, *J*<sub>C-F</sub> = 33.6 Hz), 124.9, 123.8 (*q*, *J*<sub>C-F</sub> = 272.3 Hz), 122.2, 121.8, 121.3, 118.4, 117.7, 117.4, 19.6. <sup>19</sup>F NMR (470 MHz, CDCl<sub>3</sub>, ppm) δ -61.9. FT-IR (neat, cm<sup>-1</sup>) ν 1668, 1542, 1486, 1336, 1328, 1270, 1108. HRMS (+ESI): Calculated for C<sub>24</sub>H<sub>17</sub>ClF<sub>3</sub>N<sub>2</sub>O<sub>2</sub> [M+H]<sup>+</sup> 457.09250, Found 457.09250.

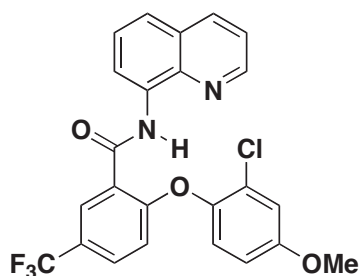

**2-(2-Chloro-4-methoxyphenoxy)-5-(trifluoromethyl)-N-(quinolin-8-yl)benzamide (Table 2, Entry 8)**

A 10 mL round-bottom flask was equipped with a magnetic stir bar and charged with 3-(trifluoromethyl)-N-(quinolin-8-yl)benzamide (0.158 g, 0.5 mmol), CuCO<sub>3</sub>•Cu(OH)<sub>2</sub> (0.012 g, 0.054 mmol), K<sub>2</sub>CO<sub>3</sub> (0.138 g, 1.0 mmol), and DMF (2.5 mL). The resulting mixture was stirred at room temperature (20 °C) for 5 minutes followed by addition of 2-chloro-4-methoxyphenol (0.079 g, 0.5 mmol) and stirring for an additional 5 minutes at room temperature. The flask was then equipped with a reflux condenser and placed in an oil-bath that had been pre-heated to 110 °C. The reaction was monitored by TLC analysis at regular intervals and removed from the oil bath after full consumption of the amide starting material (2.5 hours). The resulting dark-brown mixture was allowed to cool to room temperature and dissolved in ethyl acetate (25 mL). The diluted solution was washed with de-ionized water (2×15 mL), saturated sodium bicarbonate solution (15 mL), and brine (15 mL). The remaining organic portion was dried over sodium sulfate, filtered, and concentrated under reduced pressure. The resulting residue was absorbed on SiO<sub>2</sub> (10 mL) and subjected to column chromatography on SiO<sub>2</sub> (150 mL) with toluene (100%) to obtain 0.184 g (78%) of the pure product as a white solid. R<sub>f</sub> = 0.42 (SiO<sub>2</sub>, hexanes/ethyl acetate, 6:1). MP = 158 – 159 °C (from 6:1 hexanes/ethyl acetate). <sup>1</sup>H NMR (500 MHz, CDCl<sub>3</sub>, ppm) δ 12.24 (*s*, 1H) 8.99 (*dd*, *J* = 7.5 Hz, *J* = 1.2 Hz, 1H) 8.67 (*d*, *J* = 2.3 Hz, 1H) 8.53 (*dd*, *J* = 4.0 Hz, *J* = 1.7 Hz, 1H) 8.13 (*dd*, *J* = 8.0 Hz, *J* = 1.7 Hz, 1H) 7.63 (*dd*, *J* = 8.6 Hz, *J* = 2.3 Hz, 1H) 7.60 (*t*, *J* = 7.5, 1H) 7.53 (*dd*, *J* = 8.0 Hz, *J* = 1.2 Hz, 1H) 7.37 (*dd*, *J* = 8.0 Hz, *J* = 4.0 Hz, 1H) 7.28 (*d*, *J* = 9.2 Hz, 1H) 7.12 (*d*, *J* = 2.9 Hz, 1H) 6.94 (*dd*, *J* = 9.2 Hz, *J* = 3.4 Hz, 1H) 6.80 (*d*, *J* = 8.6 Hz, 1H) 3.87 (*s*, 3H) <sup>13</sup>C NMR (100 MHz, CDCl<sub>3</sub>, ppm) δ 161.8, 158.4, 158.0, 148.3, 143.1, 139.1, 136.2, 135.3, 130.3, 129.7, 128.0, 127.9, 127.5, 125.35 (*q*, *J*<sub>C-F</sub> = 33.6 Hz), 124.0, 123.9 (*q*, *J*<sub>C-F</sub> = 273.5 Hz) 123.8, 122.0, 121.6, 117.3, 116.1, 115.4, 114.3, 56.0. <sup>19</sup>F NMR (470 MHz, CDCl<sub>3</sub>, ppm) δ -61.8. FT-IR (neat, cm<sup>-1</sup>) ν 1668, 1544, 1487, 1327, 1266, 1211, 1113. HRMS (+ESI): Calculated for C<sub>24</sub>H<sub>17</sub>ClF<sub>3</sub>N<sub>2</sub>O<sub>3</sub> [M+H]<sup>+</sup> 473.08740, Found 473.08740.

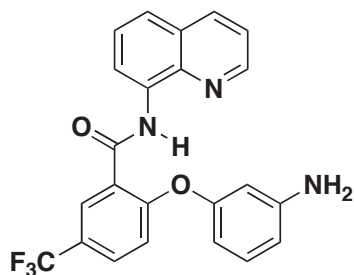

**2-(3-Aminophenoxy)-5-(trifluoromethyl)-N-(quinolin-8-yl)benzamide (Table 2, Entry 9)**

A 10 mL round-bottom flask was equipped with a magnetic stir bar and charged with 3-(trifluoromethyl)-N-(quinolin-8-yl)benzamide (0.158 g, 0.5 mmol),  $\text{CuCO}_3 \cdot \text{Cu}(\text{OH})_2$  (0.012 g, 0.054 mmol),  $\text{K}_2\text{CO}_3$  (0.138 g, 1.0 mmol), and DMF (2.5 mL). The resulting mixture was stirred at room temperature (20 °C) for 5 minutes followed by addition of 3-aminophenol (0.109 g, 1.0 mmol) and stirring for an additional 5 minutes at room temperature. The flask was then equipped with a reflux condenser and placed in an oil-bath that had been pre-heated to 120 °C. The reaction was monitored by TLC analysis at regular intervals and removed from the oil bath after full consumption of the amide starting material (6 hours). The resulting dark-brown mixture was allowed to cool to room temperature and dissolved in ethyl acetate (25 mL). The diluted solution was washed with de-ionized water (2×15 mL), saturated sodium bicarbonate solution (15 mL), and brine (15 mL). The remaining organic portion was dried over sodium sulfate, filtered, and concentrated under reduced pressure. The resulting residue was absorbed on  $\text{SiO}_2$  (10 mL) and subjected to column chromatography on  $\text{SiO}_2$  (150 mL) with toluene (100%) to obtain 0.121 g (57%) the pure product as a light tan solid.  $R_f = 0.21$  ( $\text{SiO}_2$ , 4:1 hexanes/ethyl acetate) MP 181 – 182 °C (from 6:1 hexanes/ethyl acetate).  $^1\text{H}$  NMR (500 MHz,  $\text{CDCl}_3$ , ppm)  $\delta$  12.27 (*s*, 1H) (*dd*,  $J = 7.5$  Hz,  $J = 1.2$  Hz, 1H) 8.68 (*d*,  $J = 2.3$  Hz, 1H) 8.56 (*dd*,  $J = 4.0$  Hz,  $J = 1.7$  Hz, 1H) 8.10 (*dd*,  $J = 8.0$  Hz,  $J = 1.7$  Hz, 1H) 7.64 (*dd*,  $J = 8.6$  Hz,  $J = 2.3$  Hz, 1H) 7.56 (*t*,  $J = 8.0$  Hz, 1H) 7.50 (*dd*,  $J = 8.0$  Hz,  $J = 1.2$  Hz, 1H) 7.36 (*dd*,  $J = 8.6$  Hz,  $J = 4.6$  Hz, 1H) 7.23 (*t*,  $J = 8.6$  Hz, 1H) 7.11 (*d*,  $J = 8.6$  Hz, 1H) 6.67 (*dd*,  $J = 7.5$  Hz,  $J = 1.7$  Hz, 1H) 6.59 (*d*,  $J = 4.6$  Hz, 1H) 6.58 (*d*,  $J = 1.7$  Hz, 1H) 3.85 (*s*, 2H)  $^{13}\text{C}$  NMR (100 MHz,  $\text{CDCl}_3$ , ppm)  $\delta$  161.8, 158.4, 155.8, 148.5, 148.3, 139.1, 136.2, 135.2, 130.9, 130.1, 129.7, 128.0, 127.5, 125.4 (*q*,  $J_{\text{C-F}} = 33.6$  Hz), 124.5 123.9 (*q*,  $J_{\text{C-F}} = 272.3$  Hz) 122.0, 121.7, 117.9, 117.4, 112.1, 110.2, 106.9.  $^{19}\text{F}$  NMR (470 MHz,  $\text{CDCl}_3$ , ppm)  $\delta$  -61.8. FT-IR (neat,  $\text{cm}^{-1}$ )  $\nu$  1664, 1540, 1490, 1275, 1146, 1110. HRMS (+ESI): Calculated for  $\text{C}_{23}\text{H}_{17}\text{F}_3\text{N}_3\text{O}_2$   $[\text{M}+\text{H}]^+$  424.12670, Found 424.12770.

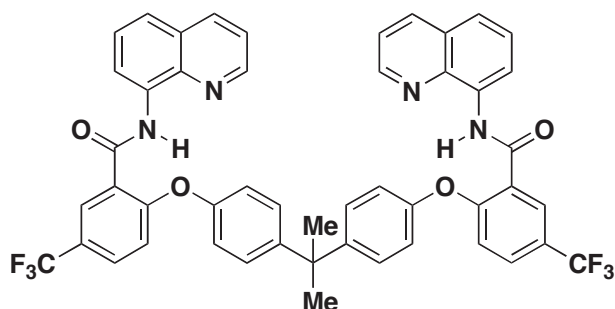

### Compound 2

A 10 mL round-bottom flask was equipped with a magnetic stir bar and charged with 3-(trifluoromethyl)-*N*-(quinolin-8-yl)benzamide (0.158 g, 0.5 mmol),  $\text{CuCO}_3 \cdot \text{Cu}(\text{OH})_2$  (0.012 g, 0.054 mmol),  $\text{K}_2\text{CO}_3$  (0.138 g, 1.0 mmol), and DMF (2.5 mL). The resulting mixture was stirred at room temperature (20 °C) for 5 minutes followed by addition of bisphenol-A (0.057 g, 0.25 mmol) and stirring for an additional 5 minutes at room temperature. The flask was then equipped with a reflux condenser and placed in an oil-bath that had been pre-heated to 110 °C. The reaction was monitored by TLC analysis at regular intervals and removed from the oil bath after full consumption of the amide starting material (12 hours). The resulting dark-brown mixture was allowed to cool to room temperature and dissolved in ethyl acetate (25 mL). The diluted solution was washed with de-ionized water (2×15 mL), saturated sodium bicarbonate solution (15 mL), and brine (15 mL). The remaining organic portion was dried over sodium sulfate, filtered, and concentrated under reduced pressure. The resulting residue was absorbed on  $\text{SiO}_2$  (10 mL) and subjected to column chromatography on  $\text{SiO}_2$  (150 mL) with toluene/ethyl acetate (30:1) to obtain 0.142 g (66%) the pure product as a tan solid.  $R_f$  = 0.35 ( $\text{SiO}_2$ , hexanes/ethyl acetate, 6:1). MP = 258 – 259 °C (from 1:1 hexanes/ethyl acetate).  $^1\text{H}$  NMR (500 MHz,  $\text{CDCl}_3$ , ppm)  $\delta$  12.20 (s, 2H) 8.98 (d,  $J$  = 7.5 Hz, 2H) 8.69 (d,  $J$  = 1.7 Hz, 2H) 8.50 (dd,  $J$  = 4.0 Hz,  $J$  = 1.7 Hz, 2H) 8.09 (dd,  $J$  = 8.6 Hz,  $J$  = 1.7 Hz, 2H) 7.66 (dd,  $J$  = 8.6 Hz,  $J$  = 2.3 Hz, 2H) 7.58 (t,  $J$  = 8.0 Hz, 2H) 7.51 (d,  $J$  = 7.5 Hz, 2H) 7.36 (d,  $J$  = 8.6 Hz, 4H) 7.31 (dd,  $J$  = 8.0 Hz,  $J$  = 4.0 Hz, 2H) 7.22 (d,  $J$  = 9.2 Hz, 4H) 7.12 (d,  $J$  = 8.6 Hz, 2H) 1.78 (s, 6H)  $^{13}\text{C}$  NMR (100 MHz,  $\text{CDCl}_3$ , ppm)  $\delta$  161.8, 158.2, 152.8, 148.2, 147.6, 139.1, 136.3, 135.2, 130.3, 129.7, 128.6, 128.1, 127.7, 125.7 (q,  $J_{\text{C-F}}$  = 33.6 Hz), 125.0, 123.9 (q,  $J_{\text{C-F}}$  = 272.3 Hz) 122.1, 121.6, 119.8, 117.9, 117.5, 42.7, 31.1.  $^{19}\text{F}$  NMR (470 MHz,  $\text{CDCl}_3$ , ppm)  $\delta$  -61.9. FT-IR (neat,  $\text{cm}^{-1}$ )  $\nu$  1667, 1536, 1492, 1328, 1270, 1241, 1165, 1119. HRMS (+ESI): HRMS (+ESI): Calculated for  $\text{C}_{49}\text{H}_{34}\text{F}_6\text{N}_4\text{O}_4\text{Na}$   $[\text{M}+\text{Na}]^+$  879.23760, Found 879.23810.

### General Etherification Procedure Employing Aliphatic Alcohols

A 10 mL round-bottom flask was equipped with a magnetic stir bar and charged with 3-(trifluoromethyl)-*N*-(quinolin-8-yl)benzamide (0.158 g, 0.5 mmol),  $\text{CuCO}_3 \cdot \text{Cu}(\text{OH})_2$  (0.012 g, 0.054 mmol), tetramethylguanidine (0.115 g, 1.0 mmol), and pyridine (2.0 mL). The resulting mixture was stirred at room temperature (20 °C) for 5 minutes followed by addition of 5 equivalents of alcohol and stirring for an additional 5 minutes at room temperature. The flask was then equipped with a reflux condenser and placed in an oil-bath that had been pre-heated to 110 °C. The reaction was monitored by TLC analysis at regular intervals and removed from the oil bath only after the starting amide was no

longer visible. The resulting dark-brown mixture was allowed to cool to room temperature and dissolved in ethyl acetate (25 mL). The diluted solution was washed with de-ionized water (2×15 mL), saturated sodium bicarbonate solution (15 mL), and brine (15 mL). The remaining organic portion was dried over sodium sulfate, filtered, and concentrated under reduced pressure. The resulting residue was absorbed on SiO<sub>2</sub> (10 mL) and subjected to column chromatography on SiO<sub>2</sub> to give the pure product.

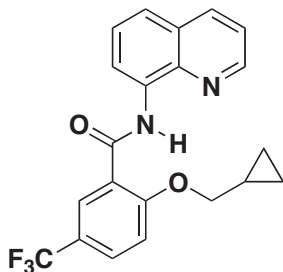

**2-(Cyclopropylmethoxy)-5-(trifluoromethyl)-N-(quinolin-8-yl)benzamide (Table 3, Entry 1)**

A 10 mL round-bottom flask was equipped with a magnetic stir bar and charged with 3-(trifluoromethyl)-N-(quinolin-8-yl)benzamide (0.158 g, 0.5 mmol), CuCO<sub>3</sub>•Cu(OH)<sub>2</sub> (0.012 g, 0.054 mmol), tetramethylguanidine (0.115 g, 1.0 mmol), and pyridine (2.0 mL). The resulting mixture was stirred at room temperature (20 °C) for 5 minutes followed by addition of cyclopropanemethanol (0.180 g, 2.5 mmol) and stirring for an additional 5 minutes at room temperature. The flask was then equipped with a reflux condenser and placed in an oil-bath that had been pre-heated to 110 °C. The reaction was monitored by TLC analysis at regular intervals and removed from the oil bath after full consumption of the amide starting material (12 hours). The resulting dark-brown mixture was allowed to cool to room temperature and dissolved in ethyl acetate (25 mL). The diluted solution was washed with de-ionized water (2×15 mL), saturated sodium bicarbonate solution (15 mL), and brine (15 mL). The remaining organic portion was dried over sodium sulfate, filtered, and concentrated under reduced pressure. The resulting residue was absorbed on SiO<sub>2</sub> (10 mL) and subjected to column chromatography on SiO<sub>2</sub> (150 mL) with hexane/ethyl acetate (10:1) to obtain 0.145 g (75%) the pure product as a white solid. R<sub>f</sub> = 0.21 (SiO<sub>2</sub>, hexanes/ethyl acetate, 8:1). MP = 154 – 155 °C (from 6:1 hexanes/ethyl acetate). <sup>1</sup>H NMR (500 MHz, CDCl<sub>3</sub>, ppm) δ 12.10 (*s*, 1H) 9.06 (*dd*, *J* = 7.5 Hz, *J* = 1.2 Hz, 1H) 8.74 (*dd*, *J* = 4.0 Hz, *J* = 1.7 Hz, 1H) 8.65 (*d*, *J* = 2.3 Hz, 1H) 8.16 (*dd*, *J* = 8.0 Hz, *J* = 1.7 Hz, 1H) 7.69 (*dd*, *J* = 8.6 Hz, *J* = 2.3 Hz, 1H) 7.59 (*t*, *J* = 8.0 Hz, 1H) 7.54 (*dd*, *J* = 8.0 Hz, *J* = 1.2 Hz, 1H) 7.44 (*dd*, *J* = 8.0 Hz, *J* = 4.0 Hz, 1H) 7.12 (*d*, *J* = 8.6 Hz, 1H) 4.22 (*d*, *J* = 6.9 Hz, 2H) 1.64 (*m*, 1H) 0.66 (*q*, *J* = 9.2 Hz, 2H) 0.48 (*q*, *J* = 5.7 Hz, 2H) <sup>13</sup>C NMR (100 MHz, CDCl<sub>3</sub>, ppm) δ 162.6, 159.3, 148.0, 139.3, 136.4, 135.6, 130.3, 129.9, 128.2, 127.6, 124.2 (*q*, *J*<sub>C-F</sub> = 272.3 Hz), 123.6 (*q*, *J*<sub>C-F</sub> = 33.6 Hz) 123.2, 122.1, 121.6, 118.0, 113.1, 75. 2, 10.2, 4.1. <sup>19</sup>F NMR (470 MHz, CDCl<sub>3</sub>, ppm) δ -61.6. FT-IR (neat, cm<sup>-1</sup>) ν 1659, 1536, 1340, 1278, 1113, 1055, 1032, 1012. HRMS (+ESI): Calculated for C<sub>21</sub>H<sub>18</sub>F<sub>3</sub>N<sub>2</sub>O<sub>2</sub> [M+H]<sup>+</sup> 387.13150, Found 387.13240.

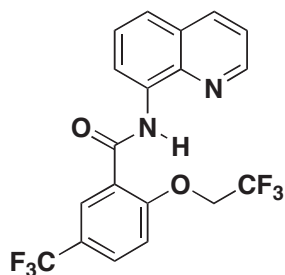

**2-(2,2,2-Trifluoroethoxy)-5-(trifluoromethyl)-N-(quinolin-8-yl)benzamide (Table 3, Entry 2)**

A 20 mL vial affixed with a pressure-relief cap and silicon/TFE septa was equipped with a magnetic stir bar and charged with 3-(trifluoromethyl)-N-(quinolin-8-yl)benzamide (0.158 g, 0.5 mmol),  $\text{CuCO}_3 \cdot \text{Cu}(\text{OH})_2$  (0.012 g, 0.054 mmol), tetramethylguanidine (0.115 g, 1.0 mmol), and pyridine (2.0 mL). The vial was then purged with oxygen for 30 seconds and allowed to stir at room temperature (20 °C) for 10 minutes. Addition of 2,2,2-trifluoroethanol (0.250 g, 0.19 mL, 2.5 mmol) was followed by a second 30-second purge with oxygen and an additional 10-minute stir at room temperature. The vial was then placed in an oil-bath that had been pre-heated to 110 °C and the reaction was assessed by TLC analysis after 8 hours. After TLC the vial was once again charged with oxygen and returned to 110 °C for an additional 8 hours. The resulting dark-brown mixture was allowed to cool to room temperature and dissolved in ethyl acetate (25 mL). The diluted solution was washed with de-ionized water (2×15 mL), saturated sodium bicarbonate solution (15 mL), and brine (15 mL). The remaining organic portion was dried over sodium sulfate, filtered, and concentrated under reduced pressure. The resulting residue was absorbed on  $\text{SiO}_2$  (10 mL) and subjected to column chromatography on  $\text{SiO}_2$  (150 mL) with hexane/ethyl acetate (6:1) to obtain 0.151 g (73%) of the pure product as a white solid.  $R_f = 0.19$  ( $\text{SiO}_2$ , hexanes/ethyl acetate, 8:1). MP = 138 – 139 °C (from 6:1 hexanes/ethyl acetate).  $^1\text{H}$  NMR (500 MHz,  $\text{CDCl}_3$ , ppm)  $\delta$  11.69 (*s*, 1H) 8.97 (*dd*,  $J = 7.5$  Hz,  $J = 1.7$  Hz, 1H) 8.79 ( $J = 4.0$  Hz,  $J = 1.7$  Hz, 1H) 8.60 ( $J = 1.7$  Hz, 1H) 8.14 (*dd*,  $J = 8.0$  Hz,  $J = 1.7$  Hz, 1H) 7.73 (*dd*,  $J = 8.6$  Hz,  $J = 2.3$  Hz, 1H) 7.57 (*t*,  $J = 8.0$  Hz, 1H) 7.53 (*dd*,  $J = 8.0$  Hz,  $J = 1.7$  Hz, 1H) 7.44 (*dd*,  $J = 8.0$  Hz,  $J = 4.0$  Hz, 1H) 7.14 (*d*,  $J = 8.6$  Hz, 1H) 4.76 (*q*,  $J_{\text{H-F}}$  8.0 Hz, 2H)  $^{13}\text{C}$  NMR (100 MHz,  $\text{CDCl}_3$ , ppm)  $\delta$  161.5, 157.4, 148.4, 139.0, 136.3, 135.0, 130.6, 130.1, 128.1, 127.4, 125.9 (*q*,  $J_{\text{C-F}} = 33.6$  Hz), 124.6, 123.8 (*q*,  $J_{\text{C-F}} = 272.3$  Hz), 123.0 (*q*,  $J_{\text{C-F}} = 279.5$  Hz), 122.4, 121.8, 117.6, 113.7, 67.2. (*q*,  $J_{\text{C-F}} = 37.2$  Hz)  $^{19}\text{F}$  NMR (470 MHz,  $\text{CDCl}_3$ , ppm)  $\delta$  -62.0, -72.7 (*t*,  $J_{\text{H-F}} = 8.7$  Hz). FT-IR (neat,  $\text{cm}^{-1}$ )  $\nu$  1663, 1547, 1329, 1264, 1171, 1146, 1118. HRMS (+ESI): Calculated for  $\text{C}_{19}\text{H}_{13}\text{F}_6\text{N}_2\text{O}_2$   $[\text{M}+\text{H}]^+$  415.08760, Found 415.08860.



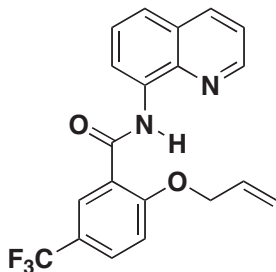

**2-(Allyloxy)-5-(trifluoromethyl)-N-(quinolin-8-yl)benzamide (Table 3, Entry 3)**

A 10 mL round-bottom flask was equipped with a magnetic stir bar and charged with 3-(trifluoromethyl)-N-(quinolin-8-yl)benzamide (0.158 g, 0.5 mmol),  $\text{CuCO}_3 \cdot \text{Cu}(\text{OH})_2$  (0.012 g, 0.054 mmol), tetramethylguanidine (0.115 g, 1.0 mmol), and pyridine (2.0 mL). The resulting mixture was stirred at room temperature (20 °C) for 5 minutes followed by addition of allyl alcohol (0.145 g, 2.5 mmol) and stirring for an additional 5 minutes at room temperature. The flask was then equipped with a reflux condenser and placed in an oil-bath that had been pre-heated to 110 °C. The reaction was monitored by TLC analysis at regular intervals and removed from the oil bath after full consumption of the amide starting material (16 hours). The resulting dark-brown mixture was allowed to cool to room temperature and dissolved in ethyl acetate (25 mL). The diluted solution was washed with de-ionized water (2×15 mL), saturated sodium bicarbonate solution (15 mL), and brine (15 mL). The remaining organic portion was dried over sodium sulfate, filtered, and concentrated under reduced pressure. The resulting residue was absorbed on  $\text{SiO}_2$  (10 mL) and subjected to column chromatography on  $\text{SiO}_2$  (150 mL) with hexane/ethyl acetate (6:1) to obtain 0.127 g (68%) of the pure product as a clear oil which solidified after some time under vacuum.  $R_f = 0.38$  ( $\text{SiO}_2$ , toluene/ethyl acetate, 30:1). MP = 101 – 102 °C (from 6:1 hexanes/ethyl acetate).  $^1\text{H}$  NMR (500 MHz,  $\text{CDCl}_3$ , ppm)  $\delta$  12.09 (*s*, 1H) 7.45 (*dd*,  $J = 7.5$  Hz,  $J = 1.2$  Hz, 1H) 8.78 (*dd*,  $J = 4.0$  Hz,  $J = 1.7$  Hz, 1H) 8.64 (*d*,  $J = 2.3$  Hz, 1H) 8.13 (*dd*,  $J = 8.0$  Hz,  $J = 1.7$  Hz, 1H) 7.67 (*dd*,  $J = 8.6$  Hz,  $J = 2.3$  Hz, 1H) 7.57 (*t*,  $J = 8.0$  Hz, 1H) 7.51 (*dd*,  $J = 8.0$  Hz,  $J = 1.2$  Hz, 1H) 7.43 (*dd*,  $J = 8.6$  Hz,  $J = 4.6$  Hz, 1H) 7.09 (*d*,  $J = 8.6$  Hz, 1H) 6.37 (*ddt*,  $J = 17.2$  Hz,  $J = 10.3$  Hz,  $J = 5.7$  Hz, 1H) 5.50 (*dd*,  $J = 17.2$  Hz,  $J = 1.2$  Hz, 1H) 5.40 (*dd*,  $J = 10.3$  Hz,  $J = 1.2$  Hz, 1H) 4.93 (*d*,  $J = 5.7$  Hz, 2H)  $^{13}\text{C}$  NMR (100 MHz,  $\text{CDCl}_3$ , ppm)  $\delta$  162.3, 158.9, 148.1, 139.2, 136.3, 135.5, 132.5, 130.3, 129.9, 128.1, 127.6, 125.2, 124.1 (*q*,  $J_{\text{C-F}} = 271.1$  Hz), 123.8 (*q*,  $J_{\text{C-F}} = 33.6$  Hz) 122.0, 121.7, 119.1, 117.7, 113.1, 71.1.  $^{19}\text{F}$  NMR (470 MHz,  $\text{CDCl}_3$ , ppm)  $\delta$  -61.7. FT-IR (neat,  $\text{cm}^{-1}$ )  $\nu$  1662, 1539, 1329, 1272, 1146, 1111. HRMS (+ESI): Calculated for  $\text{C}_{20}\text{H}_{16}\text{F}_3\text{N}_2\text{O}_2$   $[\text{M}+\text{H}]^+$  373.11580, Found 373.11620.

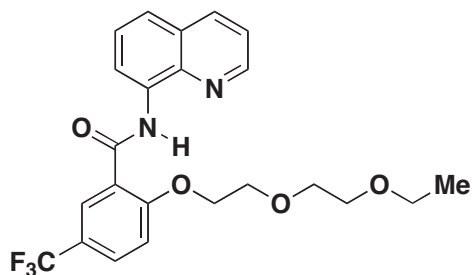

**2-(2-(2-Ethoxyethoxy)ethoxy)-5-(trifluoromethyl)-N-(quinolin-8-yl)benzamide  
(Table 3, Entry 4)**

A 10 mL round-bottom flask was equipped with a magnetic stir bar and charged with 3-(trifluoromethyl)-N-(quinolin-8-yl)benzamide (0.158 g, 0.5 mmol),  $\text{CuCO}_3 \cdot \text{Cu}(\text{OH})_2$  (0.012 g, 0.054 mmol), tetramethylguanidine (0.115 g, 1.0 mmol), and pyridine (2.0 mL). The resulting mixture was stirred at room temperature (20 °C) for 5 minutes followed by addition of carbitol (0.335 g, 2.5 mmol) and stirring for an additional 5 minutes at room temperature. The flask was then equipped with a reflux condenser and placed in an oil-bath that had been pre-heated to 110 °C. The reaction was monitored by TLC analysis at regular intervals and removed from the oil bath after full consumption of the amide starting material (16 hours). The resulting dark-brown mixture was allowed to cool to room temperature and dissolved in ethyl acetate (25 mL). The diluted solution was washed with de-ionized water (2×15 mL), saturated sodium bicarbonate solution (15 mL), and brine (15 mL). The remaining organic portion was dried over sodium sulfate, filtered, and concentrated under reduced pressure. The resulting residue was absorbed on  $\text{SiO}_2$  (10 mL) and subjected to column chromatography on  $\text{SiO}_2$  (150 mL) with toluene/ethyl acetate (10:1) to obtain 0.162 g (72%) of the pure product as a clear oil which solidified after some time under vacuum.  $R_f = 0.21$  ( $\text{SiO}_2$ , toluene/ethyl acetate, 10:1). MP = 103 – 104 °C (from 6:1 hexanes/ethyl acetate).  $^1\text{H}$  NMR (500 MHz,  $\text{CDCl}_3$ , ppm)  $\delta$  11.85 (s, 1H) 9.00 (dd,  $J = 7.5$  Hz,  $J = 1.2$  Hz, 1H) 8.80 (dd,  $J = 4.0$  Hz,  $J = 1.7$  Hz, 1H) 8.59 (d,  $J = 2.3$  Hz, 1H) 8.10 (dd,  $J = 8.0$  Hz,  $J = 1.7$  Hz, 1H) 7.64 (dd,  $J = 8.6$  Hz,  $J = 2.3$  Hz, 1H) 7.53 (t,  $J = 8.0$  Hz, 1H) 7.47 (dd,  $J = 8.0$  Hz,  $J = 1.2$  Hz, 1H) 7.40 (dd,  $J = 8.0$  Hz,  $J = 4.0$  Hz, 1H) 7.11 (d,  $J = 8.6$  Hz, 1H) 4.52 (t,  $J = 5.7$  Hz, 2H) 4.19 (t,  $J = 5.7$  Hz, 2H) 3.58 (t,  $J = 4.6$  Hz, 2H) 3.40 (t,  $J = 4.6$  Hz, 2H) 3.35 (q,  $J = 6.9$  Hz, 2H) 1.08 (t,  $J = 6.9$  Hz, 3H) ( $^{13}\text{C}$  NMR (100 MHz,  $\text{CDCl}_3$ , ppm)  $\delta$  162.3, 159.2, 148.1, 139.1, 136.5, 135.5, 130.2, 130.0, 128.2, 127.6, 125.2, 123.8 (q,  $J_{\text{C-F}} = 32.4$  Hz), 123.0, 122.1, 122.0 (q,  $J_{\text{C-F}} = 271.1$  Hz) 117.9, 113.3, 71.0, 69.8, 69.4, 69.2, 66.7, 15.2.  $^{19}\text{F}$  NMR (470 MHz,  $\text{CDCl}_3$ , ppm)  $\delta$  -61.6. FT-IR (neat,  $\text{cm}^{-1}$ )  $\nu$  1533, 1275, 1112, 1055, 1032, 1021, 1009. HRMS (+ESI): Calculated for  $\text{C}_{23}\text{H}_{24}\text{F}_3\text{N}_2\text{O}_4$   $[\text{M}+\text{H}]^+$  449.16830, Found 449.16950.

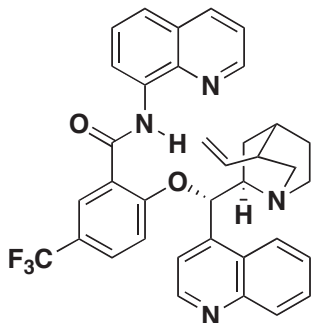

**2-((*S*)-(Quinolin-4-yl)((*2R*)-8-vinylquinuclidin-2-yl)methoxy)-5-(trifluoromethyl)-*N*-(quinolin-8-yl)benzamide (Table 3, Entry 5)**

A 10 mL round-bottom flask was equipped with a magnetic stir bar and charged with 3-(trifluoromethyl)-*N*-(quinolin-8-yl)benzamide (0.158 g, 0.5 mmol),  $\text{CuCO}_3 \cdot \text{Cu}(\text{OH})_2$  (0.012 g, 0.054 mmol), tetramethylguanidine (0.115 g, 1.0 mmol), and pyridine (6.0 mL). The resulting mixture was stirred at room temperature (20 °C) for 5 minutes followed by addition of cinchonine (0.736 g, 2.5 mmol) and stirring for an additional 5 minutes at room temperature. The flask was then equipped with a reflux condenser and placed in an oil-bath that had been pre-heated to 110 °C. The reaction was monitored by TLC analysis at regular intervals and removed from the oil bath after full consumption of the amide starting material (14 hours). The resulting dark-brown mixture was allowed to cool to room temperature and dissolved in ethyl acetate (25 mL). The diluted solution was washed with de-ionized water (2×15 mL), saturated sodium bicarbonate solution (15 mL), and brine (15 mL). The remaining organic portion was dried over sodium sulfate, filtered, and concentrated under reduced pressure. The resulting residue was absorbed on  $\text{SiO}_2$  (10 mL) and subjected to column chromatography on  $\text{SiO}_2$  (150 mL) with ethyl acetate (5% triethylamine) to obtain 0.259 g (85%) of the pure product as a yellow oil.  $R_f = 0.36$  ( $\text{SiO}_2$ , ethyl acetate/triethylamine, 95:5).  $^1\text{H}$  NMR (500 MHz,  $\text{CDCl}_3$ , ppm)  $\delta$  11.96 (*s*, 1H), 9.16 (*dd*,  $J = 7.5$  Hz,  $J = 1.7$  Hz, 1H) 8.98 (*d*,  $J = 4.0$  Hz, 1H) 8.94 (*dd*,  $J = 4.0$  Hz,  $J = 1.7$  Hz, 1H) 8.55 (*d*,  $J = 2.3$  Hz, 1H) 8.48 (*d*,  $J = 8.0$  Hz, 1H) 8.30 (*dd*,  $J = 8.0$  Hz,  $J = 1.7$  Hz, 1H) 8.22 (*d*,  $J = 8.0$  Hz, 1H) 8.18 (*d*,  $J = 4.6$  Hz, 1H) 7.79 (*t*,  $J = 7.5$  Hz, 1H) 7.67 (*m*, 3H) 7.56 (*dd*,  $J = 8.6$  Hz,  $J = 4.6$  Hz, 1H) 7.45 (*dd*,  $J = 8.6$  Hz,  $J = 2.3$  Hz, 1H) 6.86 (*d*,  $J = 8.6$  Hz, 1H) 6.07 (*d*,  $J = 8.0$  Hz, 1H) 5.82 (*ddd*,  $J = 17.2$  Hz,  $J = 10.3$  Hz,  $J = 7.5$  Hz, 1H) 4.95 (*d*,  $J = 17.2$  Hz, 1H) 4.88 (*d*,  $J = 10.3$  Hz, 1H) 3.98 (*q*,  $J = 8.6$  Hz, 1H) 2.91 (*m*, 2H) 2.71 (*m*, 1H) 2.63 (*m*, 1H) 2.18 (*q*,  $J = 8.6$  Hz, 1H) 1.78 (*m*, 1H) 1.70 (*m*, 1H) 1.57 (*s*, 1H) 1.37 (*t*,  $J = 10.9$  Hz, 1H) 1.15 (*q*,  $J = 12.0$  Hz, 1H)  $^{13}\text{C}$  NMR (100 MHz,  $\text{CDCl}_3$ , ppm)  $\delta$  162.6, 158.0, 150.6, 148.6, 147.6, 146.0, 139.8, 139.2, 137.1, 135.3, 131.2, 130.3, 120.1, 129.6, 128.4, 128.0, 127.5, 126.5, 124.2 (*q*,  $J_{\text{C-F}} = 32.9$  Hz), 123.9 (*q*,  $J_{\text{C-F}} = 272.0$  Hz) 123.8, 122.6, 122.4, 122.0, 119.0, 118.2, 115.0, 113.7, 62.4, 50.0, 49.6, 39.8, 29.8, 27.6, 26.4, 25.7.  $^{19}\text{F}$  NMR (470 MHz,  $\text{CDCl}_3$ , ppm)  $\delta$  -61.9. HRMS (+ESI): Calculated for  $\text{C}_{36}\text{H}_{32}\text{F}_3\text{N}_4\text{O}_2$  [ $\text{M}+\text{H}$ ] $^+$  609.24720, Found 609.24780.

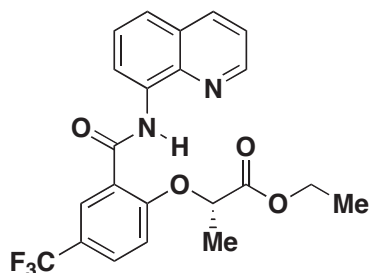

**(S)-Ethyl 2-(2-(quinolin-8-ylcarbamoyl)-4-(trifluoromethyl)phenoxy)propanoate (Table 3, Entry 6)**

A 10 mL round-bottom flask was equipped with a magnetic stir bar and charged with 3-(trifluoromethyl)-*N*-(quinolin-8-yl)benzamide (0.158 g, 0.5 mmol),  $\text{CuCO}_3 \cdot \text{Cu}(\text{OH})_2$  (0.012 g, 0.054 mmol), tetramethylguanidine (0.115 g, 1.0 mmol), and pyridine (6.0 mL). The resulting mixture was stirred at room temperature (20 °C) for 5 minutes followed by addition of ethyl-(L)-lactate (0.295 g, 2.5 mmol) and stirring for an additional 5 minutes at room temperature. The flask was then equipped with a reflux condenser and placed in an oil-bath that had been pre-heated to 110 °C. The reaction was monitored by TLC analysis at regular intervals and removed from the oil bath after full consumption of the amide starting material (16 hours). The resulting dark-brown mixture was allowed to cool to room temperature and dissolved in ethyl acetate (25 mL). The diluted solution was washed with de-ionized water (2×15 mL), saturated sodium bicarbonate solution (15 mL), and brine (15 mL). The remaining organic portion was dried over sodium sulfate, filtered, and concentrated under reduced pressure. The resulting residue was absorbed on  $\text{SiO}_2$  (10 mL) and subjected to column chromatography on  $\text{SiO}_2$  (150 mL) with ethyl acetate/hexanes (10:1 to 4:1) to obtain 0.084 g (39%) of the pure product as a faint pink solid.  $R_f = 0.20$  ( $\text{SiO}_2$ , 8:1 hexanes/ethyl acetate). MP 159 – 160 °C (from 6:1 hexanes/ethyl acetate).  $^1\text{H}$  NMR (500 MHz,  $\text{CDCl}_3$ , ppm)  $\delta$  11.89 (s, 1H) 9.07 (dd,  $J = 7.5$  Hz,  $J = 1.2$  Hz, 1H) 8.76 (dd,  $J = 4.0$  Hz,  $J = 1.7$  Hz, 1H) 8.65 (d,  $J = 1.7$  Hz, 1H) 8.17 (dd,  $J = 8.0$  Hz,  $J = 1.7$  Hz, 1H) 7.69 (dd,  $J = 8.6$  Hz,  $J = 2.3$  Hz, 1H) 7.59 (t,  $J = 8.0$  Hz, 1H) 7.55 (dd,  $J = 8.6$  Hz,  $J = 1.2$  Hz, 1H) 7.45 (dd,  $J = 8.6$  Hz,  $J = 4.6$  Hz, 1H) 7.00 (d,  $J = 8.6$  Hz, 1H) 5.17 (q,  $J = 6.9$  Hz, 1H) 4.18 (m, 2H) 2.01 (d,  $J = 6.9$  Hz, 3H) 1.15 (t,  $J = 7.5$  Hz, 3H)  $^{13}\text{C}$  NMR (100 MHz,  $\text{CDCl}_3$ , ppm)  $\delta$  170.8, 162.4, 158.1, 147.9, 139.2, 136.5, 135.5, 130.7, 129.8, 128.2, 127.7, 124.5 (q,  $J_{\text{C-F}} = 36.0$  Hz), 124.0 (q,  $J_{\text{C-F}} = 273.5$  Hz), 123.9, 122.2, 121.7, 118.0, 113.0, 74.3, 61.9, 18.6, 14.1.  $^{19}\text{F}$  NMR (470 MHz,  $\text{CDCl}_3$ , ppm)  $\delta$  -61.8. FT-IR (neat,  $\text{cm}^{-1}$ )  $\nu$ . 1743, 1668, 1533, 1324, 1274, 1210, 1147, 1107. HRMS (+ESI): Calculated for  $\text{C}_{22}\text{H}_{20}\text{F}_3\text{N}_2\text{O}_4$   $[\text{M}+\text{H}]^+$  433.13700, Found 433.13750.

**General Etherification Procedure for Amides**

A 10 mL round-bottom flask was charged with amide, (0.5 mmol, 1.0 equiv),  $\text{CuCO}_3 \cdot \text{Cu}(\text{OH})_2$  (0.054 mmol, 0.12 eq), base (1.0 mmol, 2.0 eq) and DMF (2.5 mL). The resulting mixture was stirred at room temperature (20 °C) for 5 minutes followed by addition of 4-*tert*-butylphenol (0.5 mmol, 1 equiv) and stirring for an additional 5 minutes at room temperature. The flask was then equipped with a reflux condenser and placed in an oil-bath that had been pre-heated to between (70-110) °C. The reaction was monitored by TLC analysis at regular intervals and removed from the oil bath only after

the starting amide was no longer visible. The resulting dark-brown mixture was allowed to cool to room temperature and dissolved in ethyl acetate (25 mL). The diluted solution was washed with de-ionized water (2×15 mL), saturated sodium bicarbonate solution (15 mL), and brine (15 mL). The remaining organic portion was dried over sodium sulfate, filtered, and concentrated under reduced pressure. The resulting residue was dry-absorbed on silica and purified by column chromatography to give the pure product.

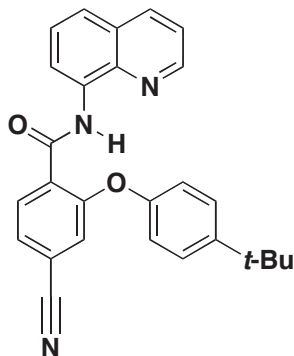

**2-(4-*tert*-Butylphenoxy)-4-cyano-*N*-(quinolin-8-yl)benzamide (Table 4, Entry 1)**

A 10 mL round-bottom flask was equipped with a magnetic stir bar and charged with 4-(cyano)-*N*-(quinolin-8-yl)benzamide (0.137 g, 0.5 mmol), CuCO<sub>3</sub>•Cu(OH)<sub>2</sub> (0.012 g, 0.054 mmol), KOAc (0.098 g, 1.0 mmol), and DMF (2.5 mL). The resulting mixture was stirred at room temperature (20 °C) for 5 minutes followed by addition of 4-*tert*-butylphenol (0.075 g, 0.5 mmol) and stirring for an additional 5 minutes at room temperature. The flask was then equipped with a reflux condenser and placed in an oil-bath that had been pre-heated to 70 °C. The reaction was monitored by TLC analysis at regular intervals and removed from the oil bath after full consumption of the amide starting material (12 hours). The resulting dark-brown mixture was allowed to cool to room temperature and dissolved in ethyl acetate (25 mL). The diluted solution was washed with de-ionized water (2×15 mL), saturated sodium bicarbonate solution (15 mL), and brine (15 mL). The remaining organic portion was dried over sodium sulfate, filtered, and concentrated under reduced pressure. The resulting residue was absorbed on SiO<sub>2</sub> (10 mL) and subjected to column chromatography on SiO<sub>2</sub> (150 mL) with hexane/ethyl acetate (6:1) to obtain 0.116 g (55%) the pure product as a white solid. R<sub>f</sub> = 0.24 (SiO<sub>2</sub>, hexanes/ethyl acetate, 6:1). MP = 207 – 208 °C (from 6:1 hexanes/ethyl acetate). <sup>1</sup>H NMR (500 MHz, CDCl<sub>3</sub>, ppm) δ 12.26 (*s*, 1H) 8.96 (*dd*, *J* = 7.5 Hz, *J* = 1.2 Hz, 1H) 8.56 (*dd*, *J* = 4.6 Hz, *J* = 1.7 Hz, 1H) 8.46 (*t*, *J* = 8.0 Hz, 1H) 8.13 (*dd*, *J* = 8.6 Hz, *J* = 1.7 Hz, 1H) 7.59 (*t*, *J* = 8.6 Hz, 1H) 7.54 (*dd*, *J* = 8.0 Hz, *J* = 1.2 Hz, 1H) 7.51 (*d*, *J* = 8.6 Hz, 2H) 7.48 (*dd*, *J* = 8.0 Hz, *J* = 1.2 Hz, 1H) 7.39 (*dd*, *J* = 8.0 Hz, *J* = 4.0 Hz, 1H) 7.25 (*d*, *J* = 1.2 Hz, 1H) 7.21 (*d*, *J* = 8.6 Hz, 2H) 1.39 (*s*, 9H) <sup>13</sup>C NMR (100 MHz, CDCl<sub>3</sub>, ppm) δ 161.5, 156.4, 151.9, 148.9, 148.4, 139.1, 136.3, 135.0, 133.4, 128.3, 128.0, 127.5, 127.4, 126.2, 122.3, 121.8, 120.5, 119.9, 117.8, 117.5, 115.9, 34.7, 31.6. FT-IR (neat, cm<sup>-1</sup>) ν 1656, 1536, 1505, 1485, 1253. HRMS (+ESI): Calculated for C<sub>27</sub>H<sub>24</sub>N<sub>3</sub>O<sub>2</sub> [M+H]<sup>+</sup> 422.18630, Found 428.18650.

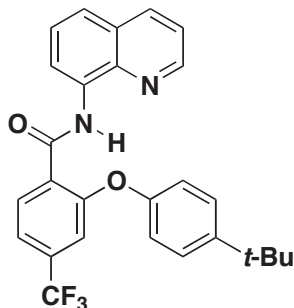

**2-(4-*tert*-Butylphenoxy)-4-(trifluoromethyl)-*N*-(quinolin-8-yl)benzamide (Table 4, Entry 2)**

A 10 mL round-bottom flask was equipped with a magnetic stir bar and charged with 4-(trifluoromethyl)-*N*-(quinolin-8-yl)benzamide (0.158 g, 0.5 mmol),  $\text{CuCO}_3 \cdot \text{Cu}(\text{OH})_2$  (0.012 g, 0.054 mmol), KOAc (0.098 g, 1.0 mmol), and DMF (2.5 mL). The resulting mixture was stirred at room temperature (20 °C) for 5 minutes followed by addition of 4-*tert*-butylphenol (0.075 g, 0.5 mmol) and stirring for an additional 5 minutes at room temperature. The flask was then equipped with a reflux condenser and placed in an oil-bath that had been pre-heated to 90 °C. The reaction was monitored by TLC analysis at regular intervals and removed from the oil bath after full consumption of the amide starting material (12 hours). The resulting dark-brown mixture was allowed to cool to room temperature and dissolved in ethyl acetate (25 mL). The diluted solution was washed with de-ionized water (2×15 mL), saturated sodium bicarbonate solution (15 mL), and brine (15 mL). The remaining organic portion was dried over sodium sulfate, filtered, and concentrated under reduced pressure. The resulting residue was absorbed on  $\text{SiO}_2$  (10 mL) and subjected to column chromatography on  $\text{SiO}_2$  (150 mL) with toluene/ethyl acetate (100:1) to obtain 0.172 g (74%) the pure product as a faintly yellow solid.  $R_f = 0.40$  ( $\text{SiO}_2$ , hexanes/ethyl acetate, 8:1). MP 181 – 182 °C (from 6:1 hexanes/ethyl acetate).  $^1\text{H}$  NMR (500 MHz,  $\text{CDCl}_3$ , ppm)  $\delta$  12.25 (s, 1H) 8.98 (dd,  $J = 7.5$  Hz,  $J = 1.2$  Hz, 1H) 8.57 (dd,  $J = 4.0$  Hz,  $J = 1.2$  Hz, 1H) 8.50 (d,  $J = 8.0$  Hz, 1H) 8.11 (dd,  $J = 8.6$  Hz,  $J = 1.7$  Hz, 1H) 7.57 (t,  $J = 8.0$  Hz, 1H) 7.52 (d,  $J = 1.2$  Hz, 1H) 7.50 (m, 1H) 7.48 (d,  $J = 9.2$  Hz, 2H) 7.38 (dd,  $J = 8.6$  Hz,  $J = 5.6$  Hz, 1H) 7.29 (s, 1H) 7.21 (d,  $J = 8.6$  Hz, 2H) 1.37 (s, 9H)  $^{13}\text{C}$  NMR (100 MHz,  $\text{CDCl}_3$ , ppm)  $\delta$  162.0, 156.0, 152.6, 148.3, 148.2, 139.1, 136.2, 135.2, 134.5 (q,  $J_{\text{C-F}} = 32.4$  Hz), 133.3, 128.0, 127.7, 127.2, 123.4 (q,  $J_{\text{C-F}} = 272.3$  Hz) 122.3, 121.7, 119.8, 119.3, 117.4, 114.8, 34.6, 31.6. The signal for one carbon could not be located.  $^{19}\text{F}$  NMR (470 MHz,  $\text{CDCl}_3$ , ppm)  $\delta$  -62.8. FT-IR (neat,  $\text{cm}^{-1}$ )  $\nu$  1667, 1543, 1326, 1056, 1032, 1011. HRMS (+ESI): Calculated for  $\text{C}_{27}\text{H}_{24}\text{F}_3\text{N}_2\text{O}_2$  [M+H] $^+$  465.17840, Found 465.17880.

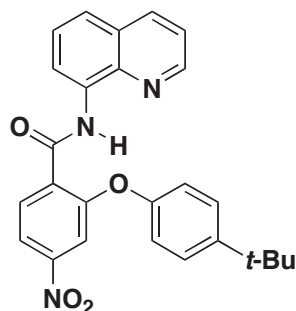

**2-(4-*tert*-Butylphenoxy)-4-nitro-*N*-(quinolin-8-yl)benzamide (Table 4, Entry 3)**

A 10 mL round-bottom flask was equipped with a magnetic stir bar and charged with 4-(nitro)-*N*-(quinolin-8-yl)benzamide (0.147 g, 0.5 mmol),  $\text{CuCO}_3 \cdot \text{Cu}(\text{OH})_2$  (0.012 g, 0.054 mmol), KOAc (0.098 g, 1.0 mmol), and DMF (2.5 mL). The resulting mixture was stirred at room temperature (20 °C) for 5 minutes followed by addition of 4-*tert*-butylphenol (0.075 g, 0.5 mmol) and stirring for an additional 5 minutes at room temperature. The flask was then equipped with a reflux condenser and placed in an oil-bath that had been pre-heated to 90 °C. The reaction was monitored by TLC analysis at regular intervals and removed from the oil bath after full consumption of the amide starting material (12 hours). The resulting dark-brown mixture was allowed to cool to room temperature and dissolved in ethyl acetate (25 mL). The diluted solution was washed with de-ionized water (2×15 mL), saturated sodium bicarbonate solution (15 mL), and brine (15 mL). The remaining organic portion was dried over sodium sulfate, filtered, and concentrated under reduced pressure. The resulting residue was absorbed on  $\text{SiO}_2$  (10 mL) and subjected to column chromatography on  $\text{SiO}_2$  (150 mL) with hexane/ethyl acetate (6:1) to obtain 0.130 g (59%) the pure product.  $R_f = 0.42$  ( $\text{SiO}_2$ , hexanes/ethyl acetate, 6:1). MP = 208 – 209 °C (from 2:1 hexanes/ethyl acetate).  $^1\text{H}$  NMR (500 MHz,  $\text{CDCl}_3$ , ppm)  $\delta$  12.29 (*s*, 1H) 8.97 (*dd*,  $J = 7.5$  Hz,  $J = 1.2$  Hz, 1H) 8.57 (*dd*,  $J = 4.0$  Hz,  $J = 1.2$  Hz, 1H) 8.54 (*d*,  $J = 8.6$  Hz, 1H) 8.14 (*d*,  $J = 6.9$  Hz, 1H) 8.03 (*dt*,  $J = 8.6$  Hz,  $J = 1.7$  Hz, 1H) 7.85 (*d*,  $J = 2.3$  Hz, 1H) 7.59 (*t*,  $J = 8.0$  Hz, 1H) 7.55 (*d*,  $J = 7.5$  Hz, 1H) 7.51 (*d*,  $J = 8.6$  Hz, 2H) 7.41 (*dd*,  $J = 8.0$  Hz,  $J = 4.0$  Hz, 1H) 7.24 (*d*,  $J = 8.6$  Hz, 2H) 1.39 (*s*, 9H)  $^{13}\text{C}$  NMR (100 MHz,  $\text{CDCl}_3$ , ppm)  $\delta$  161.3, 156.5, 152.0, 150.4, 148.9, 148.4, 139.1, 136.3, 135.0, 133.8, 129.7, 128.1, 127.6, 127.5, 122.4, 121.8, 119.7, 117.6, 117.5, 112.3, 34.7, 31.6. FT-IR (neat,  $\text{cm}^{-1}$ )  $\nu$  1667, 1529, 1242. HRMS (+ESI): Calculated for  $\text{C}_{26}\text{H}_{23}\text{N}_3\text{O}_4\text{Na}$   $[\text{M}+\text{Na}]^+$  464.15810, Found 464.15790.

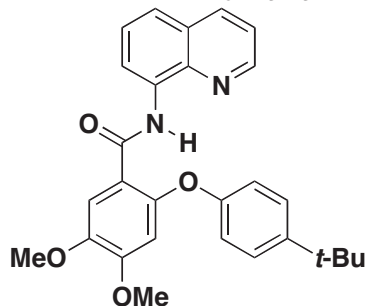

**2-(4-*tert*-Butylphenoxy)-4,5-dimethoxy-*N*-(quinolin-8-yl)benzamide (Table 4, Entry 4)**

A 10 mL round-bottom flask was equipped with a magnetic stir bar and charged with 3,4-(dimethoxy)-*N*-(quinolin-8-yl)benzamide (0.154 g, 0.5 mmol),  $\text{CuCO}_3 \cdot \text{Cu}(\text{OH})_2$  (0.012 g,

0.054 mmol), K<sub>3</sub>PO<sub>4</sub> (0.212 g, 1.0 mmol), and DMF (2.5 mL). The resulting mixture was stirred at room temperature (20 °C) for 5 minutes followed by addition of 4-*tert*-butylphenol (0.075 g, 0.5 mmol) and stirring for an additional 5 minutes at room temperature. The flask was then equipped with a reflux condenser and placed in an oil-bath that had been pre-heated to 110 °C. The reaction was monitored by TLC analysis at regular intervals and removed from the oil bath after full consumption of the amide starting material (12 hours). The resulting dark-brown mixture was allowed to cool to room temperature and dissolved in ethyl acetate (25 mL). The diluted solution was washed with de-ionized water (2×15 mL), saturated sodium bicarbonate solution (15 mL), and brine (15 mL). The remaining organic portion was dried over sodium sulfate, filtered, and concentrated under reduced pressure. The resulting residue was absorbed on SiO<sub>2</sub> (10 mL) and subjected to column chromatography on SiO<sub>2</sub> (150 mL) with toluene/ethyl acetate (30:1 to 10:1) to obtain 0.131 g (57%) of the pure product. R<sub>f</sub> = 0.35 (SiO<sub>2</sub>, hexanes/ethyl acetate, 6:1). MP = 199 – 200 °C (from 2:1 hexanes/ethyl acetate). <sup>1</sup>H NMR (500 MHz, CDCl<sub>3</sub>, ppm) δ 12.18 (*s*, 1H) 8.96 (*dd*, *J* = 7.5 Hz, *J* = 1.2 Hz, 1H) 8.61 (*dd*, *J* = 4.0 Hz, *J* = 1.7 Hz, 1H) 8.07 (*dd*, *J* = 8.6 Hz, *J* = 1.7 Hz, 1H) 7.90 (*s*, 1H) 7.53 (*t*, *J* = 8.0 Hz, 1H) 7.45 (*dd*, *J* = 8.0 Hz, *J* = 1.2 Hz, 1H) 7.37 (*d*, *J* = 9.2 Hz, 2H) 7.36 (*m*, 1H) 7.13 (*d*, *J* = 9.2 Hz, 2H) 6.61 (*s*, 1H) 4.01 (*s*, 3H) 3.81 (*s*, 3H) 1.31 (*s*, 9H) <sup>13</sup>C NMR (100 MHz, CDCl<sub>3</sub>, ppm) δ 163.0, 154.7, 152.7, 149.2, 148.0, 146.4, 145.6, 139.2, 136.1, 135.7, 128.0, 127.5, 126.6, 121.5, 121.4, 117.7, 117.4, 117.0, 113.0, 103.6, 56.4, 56.3, 34.4, 31.6. FT-IR (neat, cm<sup>-1</sup>) ν 1660, 1509, 1484, 1272, 1214. HRMS (+ESI): Calculated for C<sub>28</sub>H<sub>29</sub>N<sub>2</sub>O<sub>4</sub> [M+H]<sup>+</sup> 457.21220, Found 457.21190.

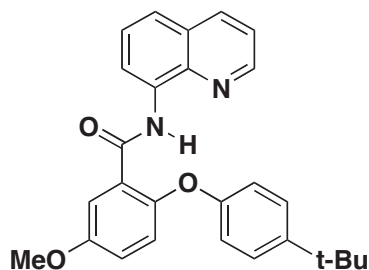

**2-(4-*tert*-Butylphenoxy)-5-methoxy-*N*-(quinolin-8-yl)benzamide (Table 4, Entry 5)**

A 10 mL round-bottom flask was equipped with a magnetic stir bar and charged with 3,4-(dimethoxy)-*N*-(quinolin-8-yl)benzamide (0.154 g, 0.5 mmol), CuCO<sub>3</sub>•Cu(OH)<sub>2</sub> (0.012 g, 0.054 mmol), K<sub>3</sub>PO<sub>4</sub> (0.212 g, 1.0 mmol), and DMF (2.5 mL). The resulting mixture was stirred at room temperature (20 °C) for 5 minutes followed by addition of 4-*tert*-butylphenol (0.075 g, 0.5 mmol) and stirring for an additional 5 minutes at room temperature. The flask was then equipped with a reflux condenser and placed in an oil-bath that had been pre-heated to 110 °C. The reaction was monitored by TLC analysis at regular intervals and removed from the oil bath after full consumption of the amide starting material (12 hours). The resulting dark-brown mixture was allowed to cool to room temperature and dissolved in ethyl acetate (25 mL). The diluted solution was washed with de-ionized water (2×15 mL), saturated sodium bicarbonate solution (15 mL), and brine (15 mL). The remaining organic portion was dried over sodium sulfate, filtered, and concentrated under reduced pressure. The resulting residue was absorbed on SiO<sub>2</sub> (10 mL) and subjected to column chromatography on SiO<sub>2</sub> (150 mL) with



toluene/ethyl acetate (30:1 to 10:1) to obtain 0.116 g (54%) of the pure product.  $R_f = 0.26$  ( $\text{SiO}_2$ , hexanes/ethyl acetate, 6:1). MP = 133 – 134 °C (from 2:1 hexanes/ethyl acetate).  $^1\text{H}$  NMR (500 MHz,  $\text{CDCl}_3$ , ppm)  $\delta$  12.26 (s, 1H) 8.98 (dd,  $J = 8.0$  Hz,  $J = 1.7$  Hz, 1H) 8.63 (dd,  $J = 4.0$  Hz,  $J = 1.7$  Hz, 1H) 8.11 (dd,  $J = 8.0$  Hz,  $J = 1.7$  Hz, 1H) 7.91 (t,  $J = 1.7$  Hz, 1H) 7.56 (t,  $J = 8.0$  Hz, 1H) 7.49 (dd,  $J = 8.6$  Hz,  $J = 1.7$  Hz, 1H) 7.39 (dd,  $J = 8.0$  Hz,  $J = 4.0$  Hz, 1H) 7.36 (d,  $J = 8.6$  Hz, 2H) 7.12 (d,  $J = 9.2$  Hz, 2H) 7.03 (d, 2H) 3.91 (s, 3H) 1.31 (s, 9H)  $^{13}\text{C}$  NMR (100 MHz,  $\text{CDCl}_3$ , ppm)  $\delta$  163.1, 155.8, 154.7, 149.0, 148.2, 146.5, 139.3, 136.1, 135.6, 128.1, 127.5, 126.6, 126.0, 121.8, 121.6, 121.1, 120.3, 118.2, 117.3, 114.8, 56.0, 34.4, 31.6. FT-IR (neat,  $\text{cm}^{-1}$ )  $\nu$  1652, 1535, 1486, 1217. HRMS (+ESI): Calculated for  $\text{C}_{27}\text{H}_{27}\text{N}_2\text{O}_3$   $[\text{M}+\text{H}]^+$  427.20160, Found 427.20270.

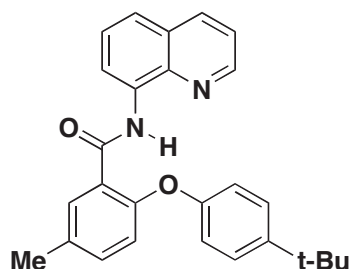

**2-(4-*tert*-Butylphenoxy)-5-methyl-*N*-(quinolin-8-yl)benzamide (Table 4, Entry 6)**

A 100 mL round-bottom flask was equipped with a magnetic stir bar and charged with 3-(methoxy)-*N*-(quinolin-8-yl)benzamide (1.34 g, 5.0 mmol),  $\text{CuCO}_3 \cdot \text{Cu}(\text{OH})_2$  (0.110 g, 0.50 mmol),  $\text{K}_3\text{PO}_4$  (2.12 g, 1.0 mmol), and DMF (25 mL). The resulting mixture was stirred at room temperature (20 °C) for 5 minutes followed by addition of 4-*tert*-butylphenol (0.758 g, 0.5 mmol) and stirring for an additional 5 minutes at room temperature. The flask was then equipped with a reflux condenser and placed in an oil-bath that had been pre-heated to 110 °C. The reaction was monitored by TLC analysis at regular intervals and removed from the oil bath after full consumption of the amide starting material (12 hours). The resulting dark-brown mixture was allowed to cool to room temperature and dissolved in ethyl acetate (150 mL). The diluted solution was washed with de-ionized water (2×100 mL), saturated sodium bicarbonate solution (100 mL), and brine (100 mL). The remaining organic portion was dried over sodium sulfate, filtered, and concentrated under reduced pressure. The resulting residue was absorbed on  $\text{SiO}_2$  (30 mL) and subjected to column chromatography on  $\text{SiO}_2$  (500 mL) with hexane/ethyl acetate (12:1) to obtain 1.25 g (60%) of the pure product.  $R_f = 0.34$  ( $\text{SiO}_2$ , hexanes/ethyl acetate, 12:1). MP = 136 – 137 °C (from 2:1 hexanes/ethyl acetate).  $^1\text{H}$  NMR (500 MHz,  $\text{CDCl}_3$ , ppm)  $\delta$  12.22 (s, 1H) 9.00 (dd,  $J = 7.5$  Hz,  $J = 1.2$  Hz, 1H) 8.61 (dd,  $J = 4.0$  Hz,  $J = 1.7$  Hz, 1H) 8.19 (d,  $J = 1.7$  Hz, 1H) 8.10 (dd,  $J = 8.0$  Hz,  $J = 1.7$  Hz, 1H) 7.56 (t,  $J = 8.0$  Hz, 1H) 7.48 (dd,  $J = 8.0$  Hz,  $J = 1.2$  Hz, 1H) 7.39 (d,  $J = 9.2$  Hz, 2H) 7.37 (dd,  $J = 8.0$  Hz, 4.0 Hz, 1H) 7.25 (dd,  $J = 6.3$  Hz, 1.7 Hz, 1H) 7.16 (d,  $J = 9.2$  Hz, 2H) 6.96 (d,  $J = 8.0$  Hz, 1H) 2.42 (s, 3H) 1.33 (s, 9H)  $^{13}\text{C}$  NMR (100 MHz,  $\text{CDCl}_3$ , ppm)  $\delta$  163.5, 154.0, 153.4, 148.2, 146.8, 139.2, 136.1, 135.7, 133.6, 133.3, 132.5, 128.0, 127.6, 126.7, 124.6, 121.6, 121.5, 118.8, 118.7, 117.2, 34.5, 31.6, 20.8. FT-IR (neat,  $\text{cm}^{-1}$ )  $\nu$  1661, 1533, 1486, 1236. HRMS (+ESI): Calculated for  $\text{C}_{27}\text{H}_{27}\text{N}_2\text{O}_2$   $[\text{M}+\text{H}]^+$  411.20670, Found 411.20710.

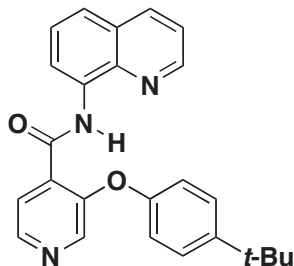

**3-(4-*tert*-Butylphenoxy)-*N*-(quinolin-8-yl)pyridine-4-carboxamide (Table 4, Entry 7)**

A 10 mL round-bottom flask was equipped with a magnetic stir bar and charged with *N*-(quinolin-8-yl)isonicotinamide (0.125 g, 0.5 mmol),  $\text{CuCO}_3 \cdot \text{Cu}(\text{OH})_2$  (0.012 g, 0.054 mmol), KOAc (0.098 g, 1.0 mmol), and DMF (2.5 mL). The resulting mixture was stirred at room temperature (20 °C) for 5 minutes followed by addition of 4-*tert*-butylphenol (0.225 g, 1.5 mmol) and stirring for an additional 5 minutes at room temperature. The flask was then equipped with a reflux condenser and placed in an oil-bath that had been pre-heated to 90 °C. The reaction was monitored by TLC analysis at regular intervals and removed from the oil bath after full consumption of the amide starting material (9 hours). The resulting dark-brown mixture was allowed to cool to room temperature and dissolved in ethyl acetate (25 mL). The diluted solution was washed with de-ionized water (2×15 mL), saturated sodium bicarbonate solution (15 mL), and brine (15 mL). The remaining organic portion was dried over sodium sulfate, filtered, and concentrated under reduced pressure. The resulting residue was absorbed on  $\text{SiO}_2$  (10 mL) and subjected to column chromatography on  $\text{SiO}_2$  (150 mL) with hexane/ethyl acetate (6:1 to 5:1) to obtain 0.102 g (51%) the pure product as a light yellow oil.  $R_f = 0.17$  ( $\text{SiO}_2$ , hexanes/ethyl acetate, 6:1). MP 169 – 170 °C (from 6:1 hexanes/ethyl acetate).  $^1\text{H}$  NMR (500 MHz,  $\text{CDCl}_3$ , ppm)  $\delta$  12.17 (*s*, 1H) 8.93 (*dd*,  $J = 7.5$  Hz,  $J = 1.2$  Hz, 1H) 8.54 (*dd*,  $J = 4.6$  Hz,  $J = 1.7$  Hz, 1H) 8.52 (*d*,  $J = 5.2$  Hz, 1H) 8.44 (*s*, 1H) 8.17 (*d*,  $J = 4.6$  Hz, 1H) 8.04 (*dd*,  $J = 8.6$  Hz,  $J = 1.7$  Hz, 1H) 7.50 (*t*,  $J = 8.0$  Hz, 1H) 7.45 (*dd*,  $J = 8.6$  Hz,  $J = 1.2$  Hz, 1H) 7.43 (*d*,  $J = 8.6$  Hz, 2H) 7.32 (*dd*,  $J = 8.0$  Hz,  $J = 4.0$  Hz, 1H) 7.18 (*d*,  $J = 8.6$  Hz, 2H) 1.32 (*s*, 9H)  $^{13}\text{C}$  NMR (100 MHz,  $\text{CDCl}_3$ , ppm)  $\delta$  161.0, 153.0, 150.8, 148.3, 147.8, 144.9, 141.5, 138.9, 136.1, 134.8 130.9, 127.8, 127.3, 127.0, 124.5, 122.3, 121.6, 118.7, 117.4, 34.5, 31.5. 1663, 1542, 1507, 1483, 1223. HRMS (+ESI): Calculated for  $\text{C}_{25}\text{H}_{23}\text{N}_3\text{O}_2\text{Na}$   $[\text{M}+\text{Na}]^+$  420.16820, Found 420.16890.

**Di-phenoxylation of *N*-(quinolin-8-yl)isonicotinamide.**

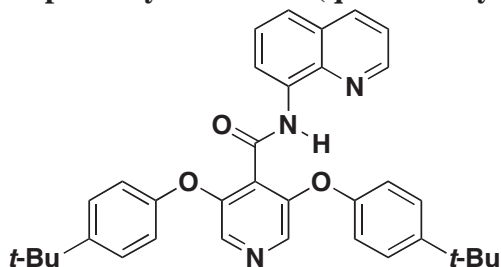

**3,5-bis(4-*tert*-Butylphenoxy)-*N*-(quinolin-8-yl)pyridine-4-carboxamide (Table 4, Entry 6)**

A 10 mL round-bottom flask was equipped with a magnetic stir bar and charged with *N*-(quinolin-8-yl)isonicotinamide (0.125 g, 0.5 mmol),  $\text{CuCO}_3 \cdot \text{Cu}(\text{OH})_2$  (0.012 g, 0.054

mmol), K<sub>3</sub>PO<sub>4</sub> (0.424 g, 2.0 mmol), and DMF (2.5 mL). The resulting mixture was stirred at room temperature (20 °C) for 5 minutes followed by addition of 4-*tert*-butylphenol (0.225 g, 1.5 mmol) and stirring for an additional 5 minutes at room temperature. The flask was then equipped with a reflux condenser and placed in an oil-bath that had been pre-heated to 110 °C. The reaction was monitored by TLC analysis at regular intervals and removed from the oil bath after full consumption of the amide starting material (9 hours). The resulting dark-brown mixture was allowed to cool to room temperature and dissolved in ethyl acetate (25 mL). The diluted solution was washed with de-ionized water (2×15 mL), saturated sodium bicarbonate solution (15 mL), and brine (15 mL). The remaining organic portion was dried over sodium sulfate, filtered, and concentrated under reduced pressure. The resulting residue was absorbed on SiO<sub>2</sub> (10 mL) and subjected to column chromatography on SiO<sub>2</sub> (150 mL) with hexane/ethyl acetate (10:1 to 5:1) to obtain 0.130 g (47%) the pure product as a light yellow oil. R<sub>f</sub> = 0.47 (SiO<sub>2</sub>, hexanes/ethyl acetate, 10:1). <sup>1</sup>H NMR (500 MHz, CDCl<sub>3</sub>, ppm) δ 10.42 (*s*, 1H) 8.83 (*dd*, *J* = 6.3 Hz, *J* = 1.7 Hz, 1H) 8.74 (*dd*, *J* = 4.0 Hz, *J* = 1.2 Hz, 1H) 8.11 (*s*, 2H) 8.08 (*d*, *J* = 8.0 Hz, 1H) 7.47 (*t*, *J* = 6.9 Hz, 2H) 7.38 (*dd*, *J* = 8.0 Hz, *J* = 3.9 Hz, 1H) 7.34 (*d*, *J* = 8.6 Hz, 4H) 7.11 (*d*, *J* = 8.6 Hz, 4H) 1.27 (*s*, 18H) <sup>13</sup>C NMR (100 MHz, CDCl<sub>3</sub>, ppm) δ 160.2, 153.7, 151.5, 148.2, 147.5, 138.3, 136.3, 135.1, 134.1, 127.8, 127.3, 126.8, 126.3, 122.2, 121.6, 118.9, 117.0, 34.4, 31.4. HRMS (+ESI): Calculated for C<sub>35</sub>H<sub>36</sub>N<sub>3</sub>O<sub>3</sub> [M+H]<sup>+</sup> 546.27510, Found 546.27460.

### Phenoxylation of Picolinamide

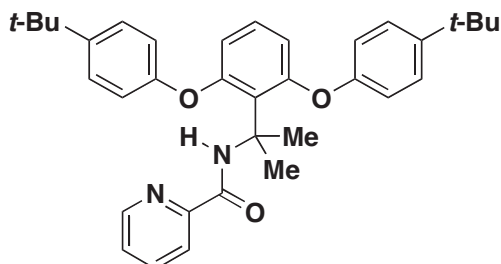

### *N*-(2-(2,6-bis(4-*tert*-Butylphenoxy)phenyl)propan-2-yl)picolinamide (Compound 3)

A 10 mL round-bottom flask was equipped with a magnetic stir bar and charged with *N*-(2-phenylpropan-2-yl)picolinamide (0.120 g, 0.5 mmol), CuCO<sub>3</sub>•Cu(OH)<sub>2</sub> (0.012 g, 0.054 mmol), K<sub>3</sub>PO<sub>4</sub> (0.424 g, 2.0 mmol), and DMF (2.5 mL). The resulting mixture was stirred at room temperature (20 °C) for 5 minutes followed by addition of 4-*tert*-butylphenol (0.150 g, 1.0 mmol) and stirring for an additional 5 minutes at room temperature. The flask was then equipped with a reflux condenser and placed in an oil-bath that had been pre-heated to 130 °C. The reaction was monitored by TLC analysis at regular intervals and removed from the oil bath after full consumption of the amide starting material (8 hours). The resulting dark-brown mixture was allowed to cool to room temperature and dissolved in ethyl acetate (25 mL). The diluted solution was washed with de-ionized water (2×15 mL), saturated sodium bicarbonate solution (15 mL), and brine (15 mL). The remaining organic portion was dried over sodium sulfate, filtered, and concentrated under reduced pressure. The resulting residue was absorbed on

SiO<sub>2</sub> (10 mL) and subjected to column chromatography on SiO<sub>2</sub> (150 mL) with hexane/ethyl acetate (10:1 to 6:1) to obtain 0.130 g (48%) of the pure product as a light tan oil. *R*<sub>f</sub> = 0.37 (SiO<sub>2</sub>, hexanes/ethyl acetate, 10:1). <sup>1</sup>H NMR (500 MHz, CDCl<sub>3</sub>, ppm) δ 8.75 (*s*, 1H) 8.23 (*d*, *J* = 4.6 Hz, 1H) 8.04 (*d*, *J* = 8.0 Hz, 1H) 7.69 (*td*, *J* = 8.0 Hz, *J* = 1.7 Hz, 1H) 7.21 (*m*, 1H) 7.19 (*d*, *J* = 9.2 Hz, 4H) 7.05 (*t*, *J* = 8.0 Hz, 1H) 6.90 (*d*, *J* = 8.6 Hz, 4H) 6.68 (*d*, *J* = 8.0 Hz, 2H) 2.05 (*s*, 6H) 1.26 (*s*, 18H) <sup>13</sup>C NMR (100 MHz, CDCl<sub>3</sub>, ppm) δ 162.8, 156.2, 155.6, 150.7, 147.5, 145.0, 136.8, 129.0, 127.7, 126.3, 125.4, 121.5, 117.7, 116.9, 55.2, 34.2, 31.6, 29.9. HRMS (+ESI): Calculated for C<sub>35</sub>H<sub>40</sub>N<sub>3</sub>O<sub>3</sub>Na [M+Na]<sup>+</sup> 559.29310, Found 559.29370.

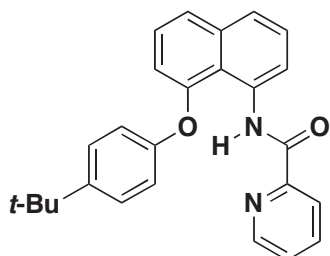

***N*-(1-(4-*tert*-butylphenoxy)naphthalen-8-yl)picolinamide (Compound 4)**

A 10 mL round-bottom flask was equipped with a magnetic stir bar and charged with *N*-(naphthalen-8-yl)picolinamide (0.160 g, 0.5 mmol), CuCO<sub>3</sub>•Cu(OH)<sub>2</sub> (0.012 g, 0.054 mmol), K<sub>3</sub>PO<sub>4</sub> (0.212 g, 1.0 mmol), and DMF (2.5 mL). The resulting mixture was stirred at room temperature (20 °C) for 5 minutes followed by addition of 4-*tert*-butylphenol (0.075 g, 0.5 mmol) and stirring for an additional 5 minutes at room temperature. The flask was then equipped with a reflux condenser and placed in an oil-bath that had been pre-heated to 110 °C. The reaction was monitored by TLC analysis at regular intervals and removed from the oil bath after full consumption of the amide starting material (6 hours). The resulting dark-brown mixture was allowed to cool to room temperature and dissolved in ethyl acetate (25 mL). The diluted solution was washed with de-ionized water (2×15 mL), saturated sodium bicarbonate solution (15 mL), and brine (15 mL). The remaining organic portion was dried over sodium sulfate, filtered, and concentrated under reduced pressure. The resulting residue was absorbed on SiO<sub>2</sub> (10 mL) and subjected to column chromatography on SiO<sub>2</sub> (150 mL) with hexane/ethyl acetate (6:1) to obtain 0.159 g (70%) of the pure product as a beige solid. *R*<sub>f</sub> = 0.28 (SiO<sub>2</sub>, hexanes/ethyl acetate, 8:1). MP = 135 – 136 °C (from 6:1 hexanes/ethyl acetate). <sup>1</sup>H NMR (500 MHz, CDCl<sub>3</sub>, ppm) δ 13.08 (*s*, 1H) 9.07 (*dd*, *J* = 8.0 Hz, *J* = 1.2 Hz, 1H) 8.26 (*m*, 2H) 7.79 (*td*, *J* = 7.5 Hz, *J* = 1.7 Hz, 1H) 7.63 (*d*, *J* = 7.5 Hz, 1H) 7.57 (*t*, *J* = 8.0 Hz, 2H) 7.41 (*d*, *J* = 9.2 Hz, 2H) 7.31 (*m*, 2H) 7.16 (*d*, *J* = 8.6 Hz, 2H) 6.97 (*d*, *J* = 8.6 Hz, 1H) 1.35 (*s*, 9H) <sup>13</sup>C NMR (100 MHz, CDCl<sub>3</sub>, ppm) δ 162.7, 154.4, 154.1, 150.6, 147.8, 146.9, 137.3, 136.6, 134.7, 126.9, 126.5, 126.0, 125.7, 124.0, 123.9, 122.1, 119.5, 117.8, 116.9, 113.7, 34.4, 31.6. FT-IR (neat, cm<sup>-1</sup>) ν 1681, 1540, 1497, 1227. HRMS (+ESI): Calculated for C<sub>26</sub>H<sub>25</sub>N<sub>2</sub>O<sub>2</sub> [M+H]<sup>+</sup> 397.19110, Found 397.19220.

### Large Scale Synthesis

A 100 mL round-bottom flask was equipped with a magnetic stir bar and charged with *N*-(naphthalen-8-yl)picolinamide (1.24 g, 5.0 mmol),  $\text{CuCO}_3 \cdot \text{Cu}(\text{OH})_2$  (0.124 g, 0.56 mmol),  $\text{K}_3\text{PO}_4$  (2.12 g, 10.0 mmol), and DMF (25 mL). The resulting mixture was stirred at room temperature (20 °C) for 5 minutes followed by addition of 4-*tert*-butylphenol (0.758 g, 5.0 mmol) and stirring for an additional 5 minutes at room temperature. The flask was then equipped with a reflux condenser and placed in an oil-bath that had been pre-heated to 110 °C. The reaction was monitored by TLC analysis at regular intervals and removed from the oil bath after full consumption of the amide starting material (12 hours). The resulting dark-brown mixture was allowed to cool to room temperature and dissolved in ethyl acetate (100 mL). The diluted solution was washed with de-ionized water (2×25 mL), saturated sodium bicarbonate solution (25 mL), and brine (25 mL). The remaining organic portion was dried over sodium sulfate, filtered, and concentrated under reduced pressure. The resulting residue was absorbed on  $\text{SiO}_2$  (20 mL) and subjected to column chromatography on  $\text{SiO}_2$  (400 mL) with hexane/ethyl acetate (6:1) to obtain 1.98 g (73%) of the pure product as a beige solid.

### Cleavage of Picolinamide Auxiliary

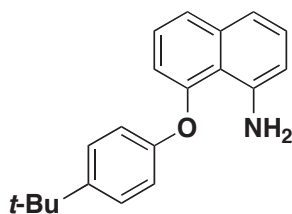

### 8-(4-*tert*-Butylphenoxy)naphthalen-1-amine (Compound 5)

A 50 mL pressure-bomb equipped with a magnetic stir bar was charged with *N*-(1-(4-*tert*-butylphenoxy)naphthalen-8-yl)picolinamide (1.38 g, 3.48 mmol), NaOH (1.39 g, 34.8 mmol) and 15 mL of a 10:1 mixture of ethanol and water. The vessel was sealed and placed in an oil bath, which had been that had been pre-heated to 130 °C, for 8 hours. After cooling to room temperature, the reaction mixture was diluted with de-ionized water (30 mL) and extracted with  $\text{CH}_2\text{Cl}_2$  (4×40 mL). The combined organic portions were dried over sodium sulfate, filtered, and concentrated under reduced pressure. The resulting residue was absorbed on  $\text{SiO}_2$  (30 mL) and subjected to column chromatography on  $\text{SiO}_2$  (300 mL) with toluene/ethyl acetate (30:1) to obtain 1.01 g (88%) of the pure product as a beige solid.  $R_f = 0.47$  ( $\text{SiO}_2$ , toluene/ethyl acetate, 30:1). MP = 126 – 127 °C (from 6:1 hexanes/ethyl acetate).  $^1\text{H}$  NMR (500 MHz,  $\text{CDCl}_3$ , ppm)  $\delta$  7.49 (*d*,  $J = 8.0$  Hz, 1H) 7.42 (*d*,  $J = 8.6$  Hz, 2H) 7.22 (*m*, 3H) 7.03 (*d*,  $J = 8.6$  Hz, 2H) 6.68 (*d*,  $J = 7.5$  Hz, 1H) 6.62 (*d*,  $J = 7.6$  Hz, 1H) 5.22 (*s*, 2H) 1.33 (*s*, 9H)  $^{13}\text{C}$  NMR (100 MHz,  $\text{CDCl}_3$ , ppm)  $\delta$  155.9, 154.3, 147.0, 144.1, 137.5, 127.3, 127.0, 125.7, 123.7, 119.4, 117.4, 116.4, 112.3, 110.2, 34.5, 31.6. FT-IR (neat,  $\text{cm}^{-1}$ )  $\nu$  1593, 1578, 1504, 1396, 1231. HRMS (+ESI): Calculated for  $\text{C}_{20}\text{H}_{22}\text{NO}$   $[\text{M}+\text{H}]^+$  292.16960, Found 292.16870.

## Cleavage of 8-Aminoquinoline Auxiliary

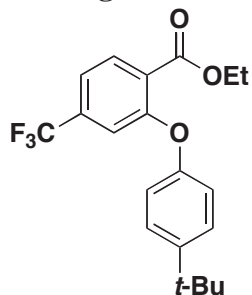

### 2-(4-*tert*-Butylphenoxy)-4-(trifluoromethyl)benzoic acid Ethyl Ester (Compound 6)

A 2-dram screw-cap vial was equipped with a magnetic stir bar and charged with 2-(4-*tert*-butylphenoxy)-5-(trifluoromethyl)-*N*-(quinolin-8-yl)benzamide (0.116 g, 0.25 mmol). Sequential addition of NaOH (0.150 g, 3.75 mmol) and ethanol (1.0 mL) resulted in a tan suspension. The suspension was heated at 120 °C for 24 hours giving a light-yellow mixture. After cooling to room temperature (22 °C) the solution was diluted with 25 mL of ethyl acetate and washed with 1M HCl (4×20 mL). The combined aqueous layers were washed with ethyl acetate (4×25 mL) and the organic portions were collected and dried over Na<sub>2</sub>SO<sub>4</sub>. Rotary evaporation resulted in isolation of 0.084 g (91%) of product as a yellow oil.  $R_f = 0.27$  (SiO<sub>2</sub>, hexane/ethyl acetate, 12:1). <sup>1</sup>H NMR (500 MHz, CDCl<sub>3</sub>, ppm)  $\delta$  8.42 (*d*,  $J = 1.7$  Hz, 1H) 7.89 (*dd*,  $J = 9.2$  Hz,  $J = 2.3$  Hz, 1H) 7.24 (*d*,  $J = 8.6$  Hz, 2H) 7.14 (*d*,  $J = 8.6$  Hz, 1H) 6.82 (*d*,  $J = 8.6$  Hz, 1H) 4.36 (*q*,  $J = 7.5$  Hz, 2H) 1.58 (*t*,  $J = 6.9$  Hz, 3H) 1.28 (*s*, 9H) <sup>13</sup>C NMR (100 MHz, CDCl<sub>3</sub>, ppm)  $\delta$  165.2, 159.9, 153.5, 143.3, 132.1, 131.1, 126.4 124.5 (*q*,  $J_{C-F} = 33.6$  Hz), 123.6 (*q*,  $J_{C-F} = 271.1$  Hz) 118.2, 114.9, 113.2, 66.7, 34.1, 31.6, 14.6. <sup>19</sup>F NMR (470 MHz, CDCl<sub>3</sub>, ppm)  $\delta$  -62.0.

## Control Experiment

### Standard Conditions Without Copper Catalyst.

A 4-dram screw-cap vial was equipped with a magnetic stir bar and charged with 3-(trifluoromethyl)-*N*-(quinolin-8-yl)benzamide (0.032 g, 0.1 mmol), K<sub>2</sub>CO<sub>3</sub> (0.028 g, 0.2 mmol), and DMF (1 mL). The resulting mixture was stirred at room temperature (20 °C) for 5 minutes. 4-*tert*-butylphenol (0.030 g, 0.2 mmol) was added and the vial was allowed to stir for 5 minutes at room temperature. The vial was placed in a reaction block that had been pre-heated to 110 °C for 12 hours. The resulting mixture was allowed to cool to room temperature then dissolved in 15 mL of ethyl acetate. The diluted solution was washed with de-ionized water (2×10 mL), saturated sodium bicarbonate solution (10 mL), and brine (10 mL). The remaining organic portion was dried over sodium sulfate, filtered through a pad of celite®, and concentrated under reduced pressure. After drying under vacuum for 12 hours 0.1 eq of 1,3,5-trimethoxybenzene was added as an internal standard and the yield was determined by NMR spectroscopy. No detectable amount of product was observed.

## References:

- 1: Tran, L. D.; Roane, J.; Daugulis, O. *Angew. Chem. Int. Ed.* **2013**, *52*, 6043.
- 2: Truong, T; Klimovica, K.; Daugulis, O. *J. Am. Chem. Soc.* **2013**, *135*, 9342.
- 3: Tran, L. D.; Popov, I.; Daugulis, O. *J. Am. Chem. Soc.* **2012**, *134*, 18237.
- 4: Lehao, H.; Qian, L.; Chen, W.; Chenze, Q. *J. Org. Chem.* **2013**, *78*, 3030.

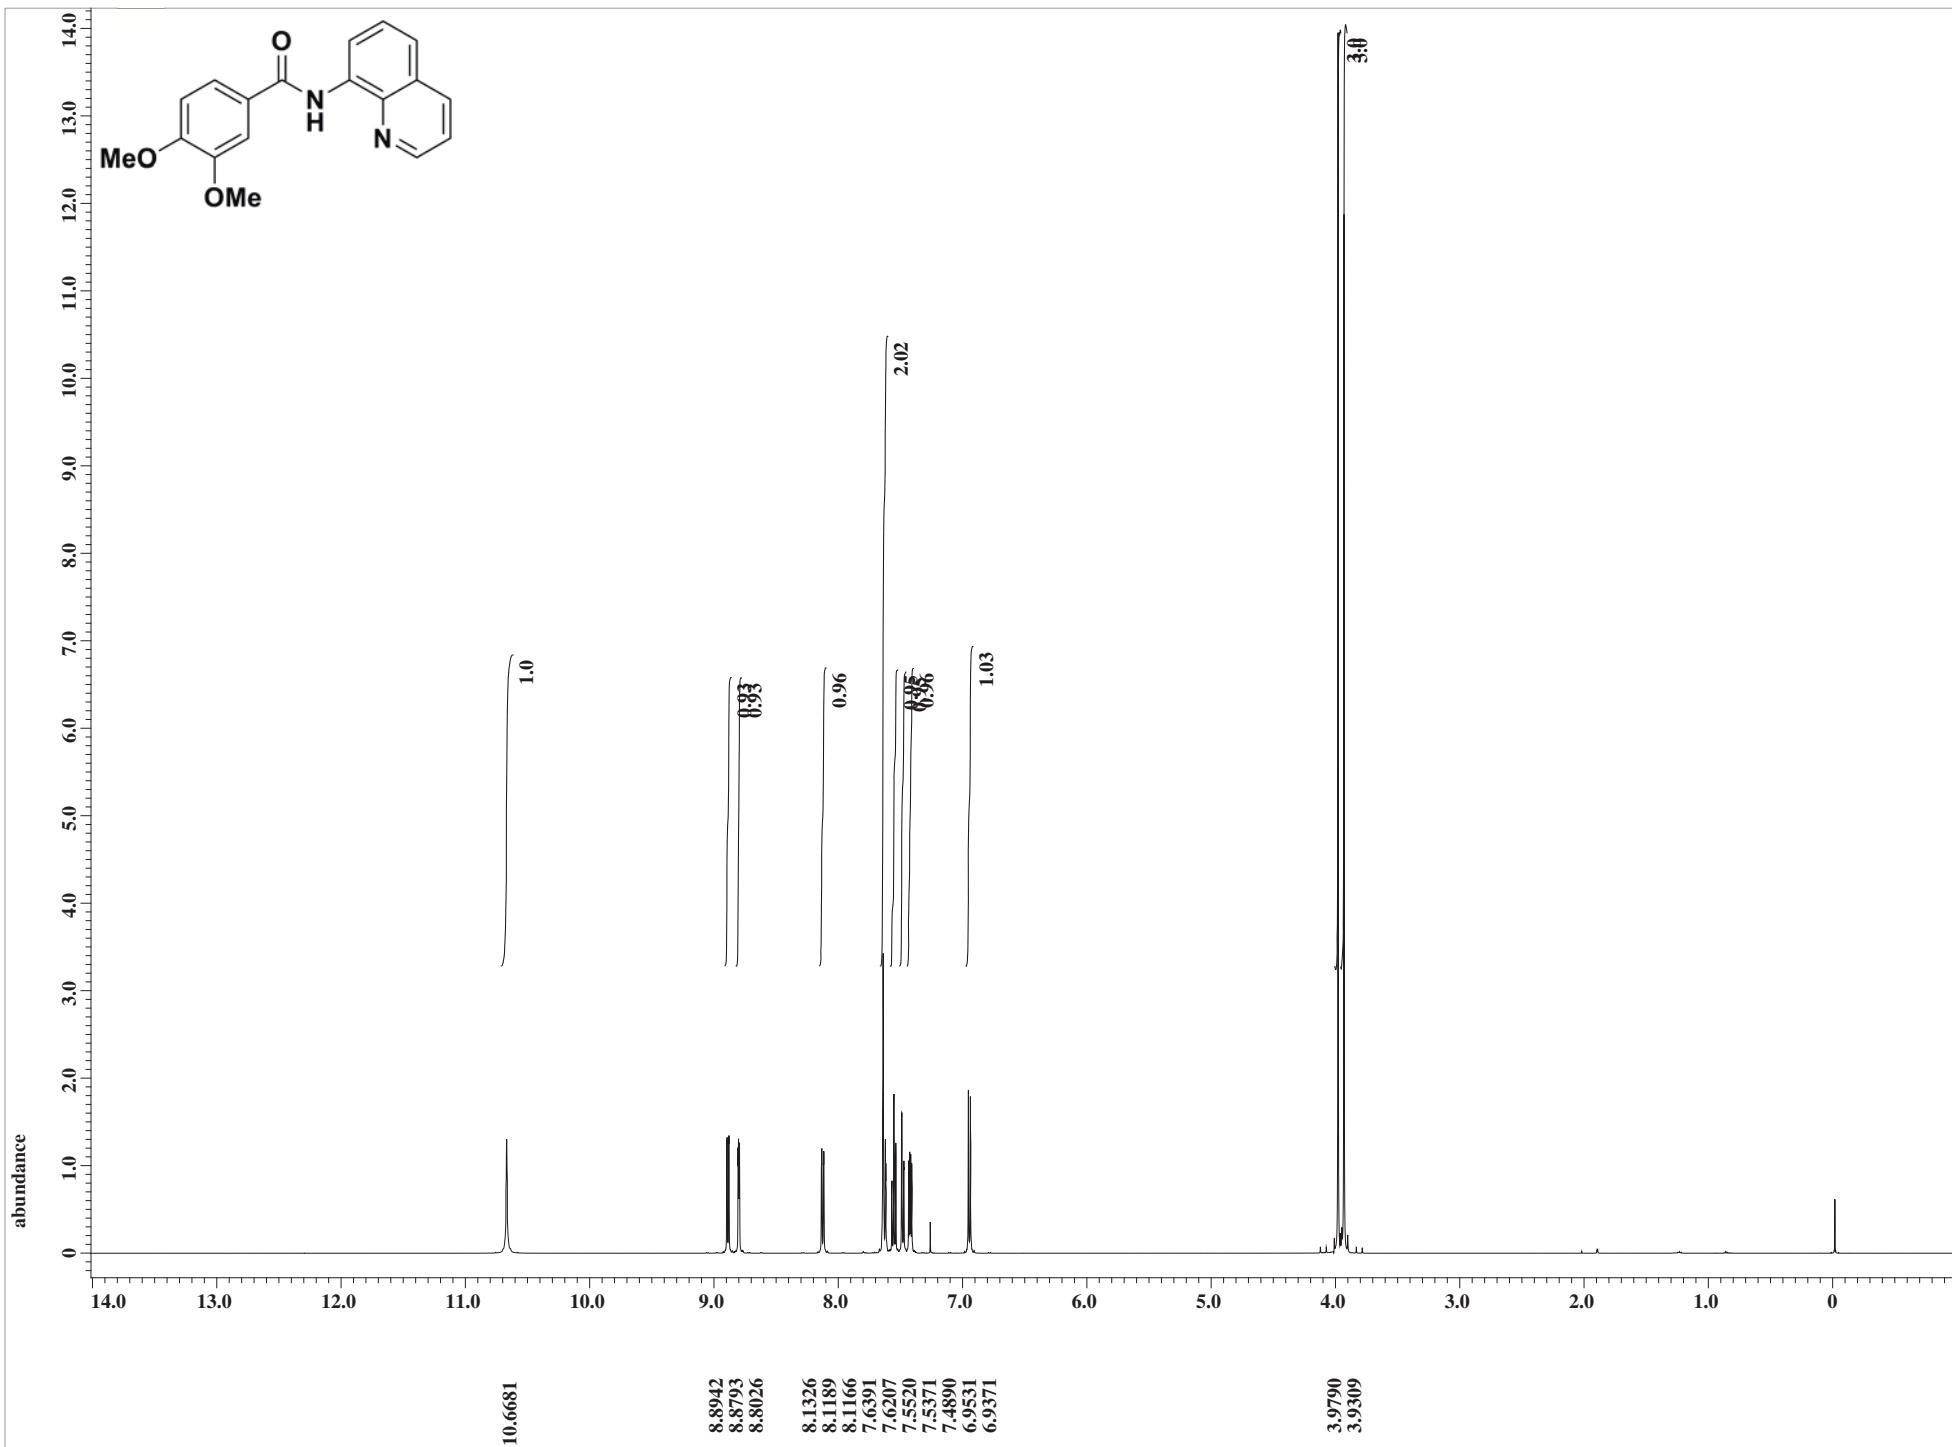

X : parts per Million : 1H

S32



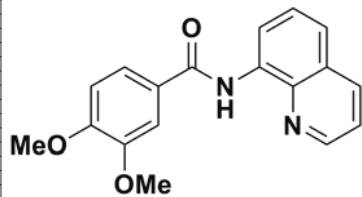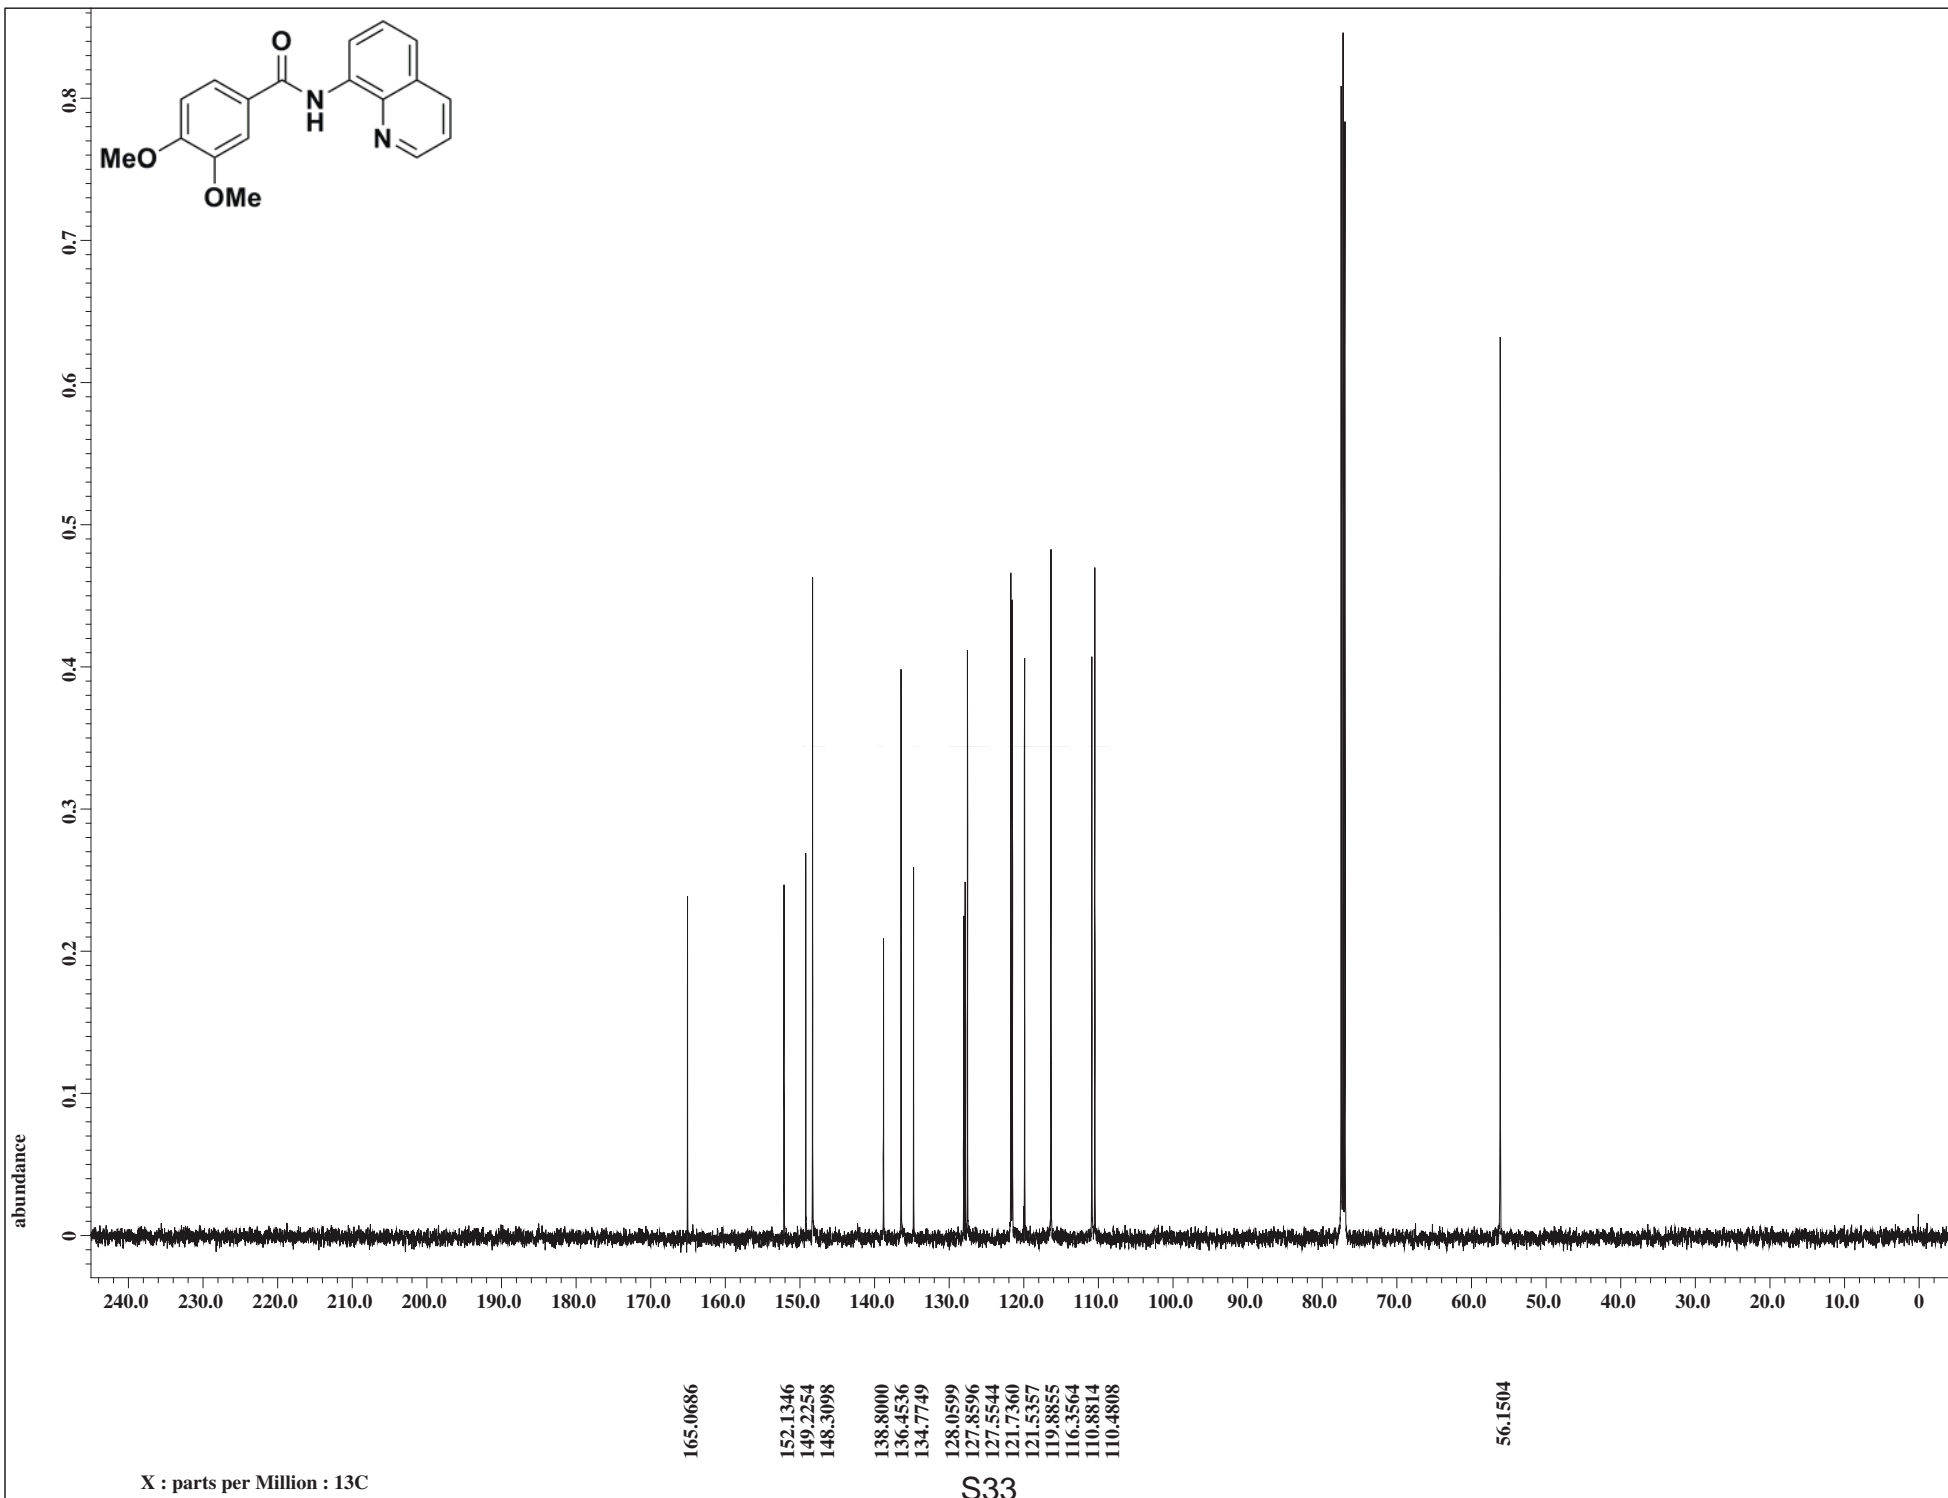

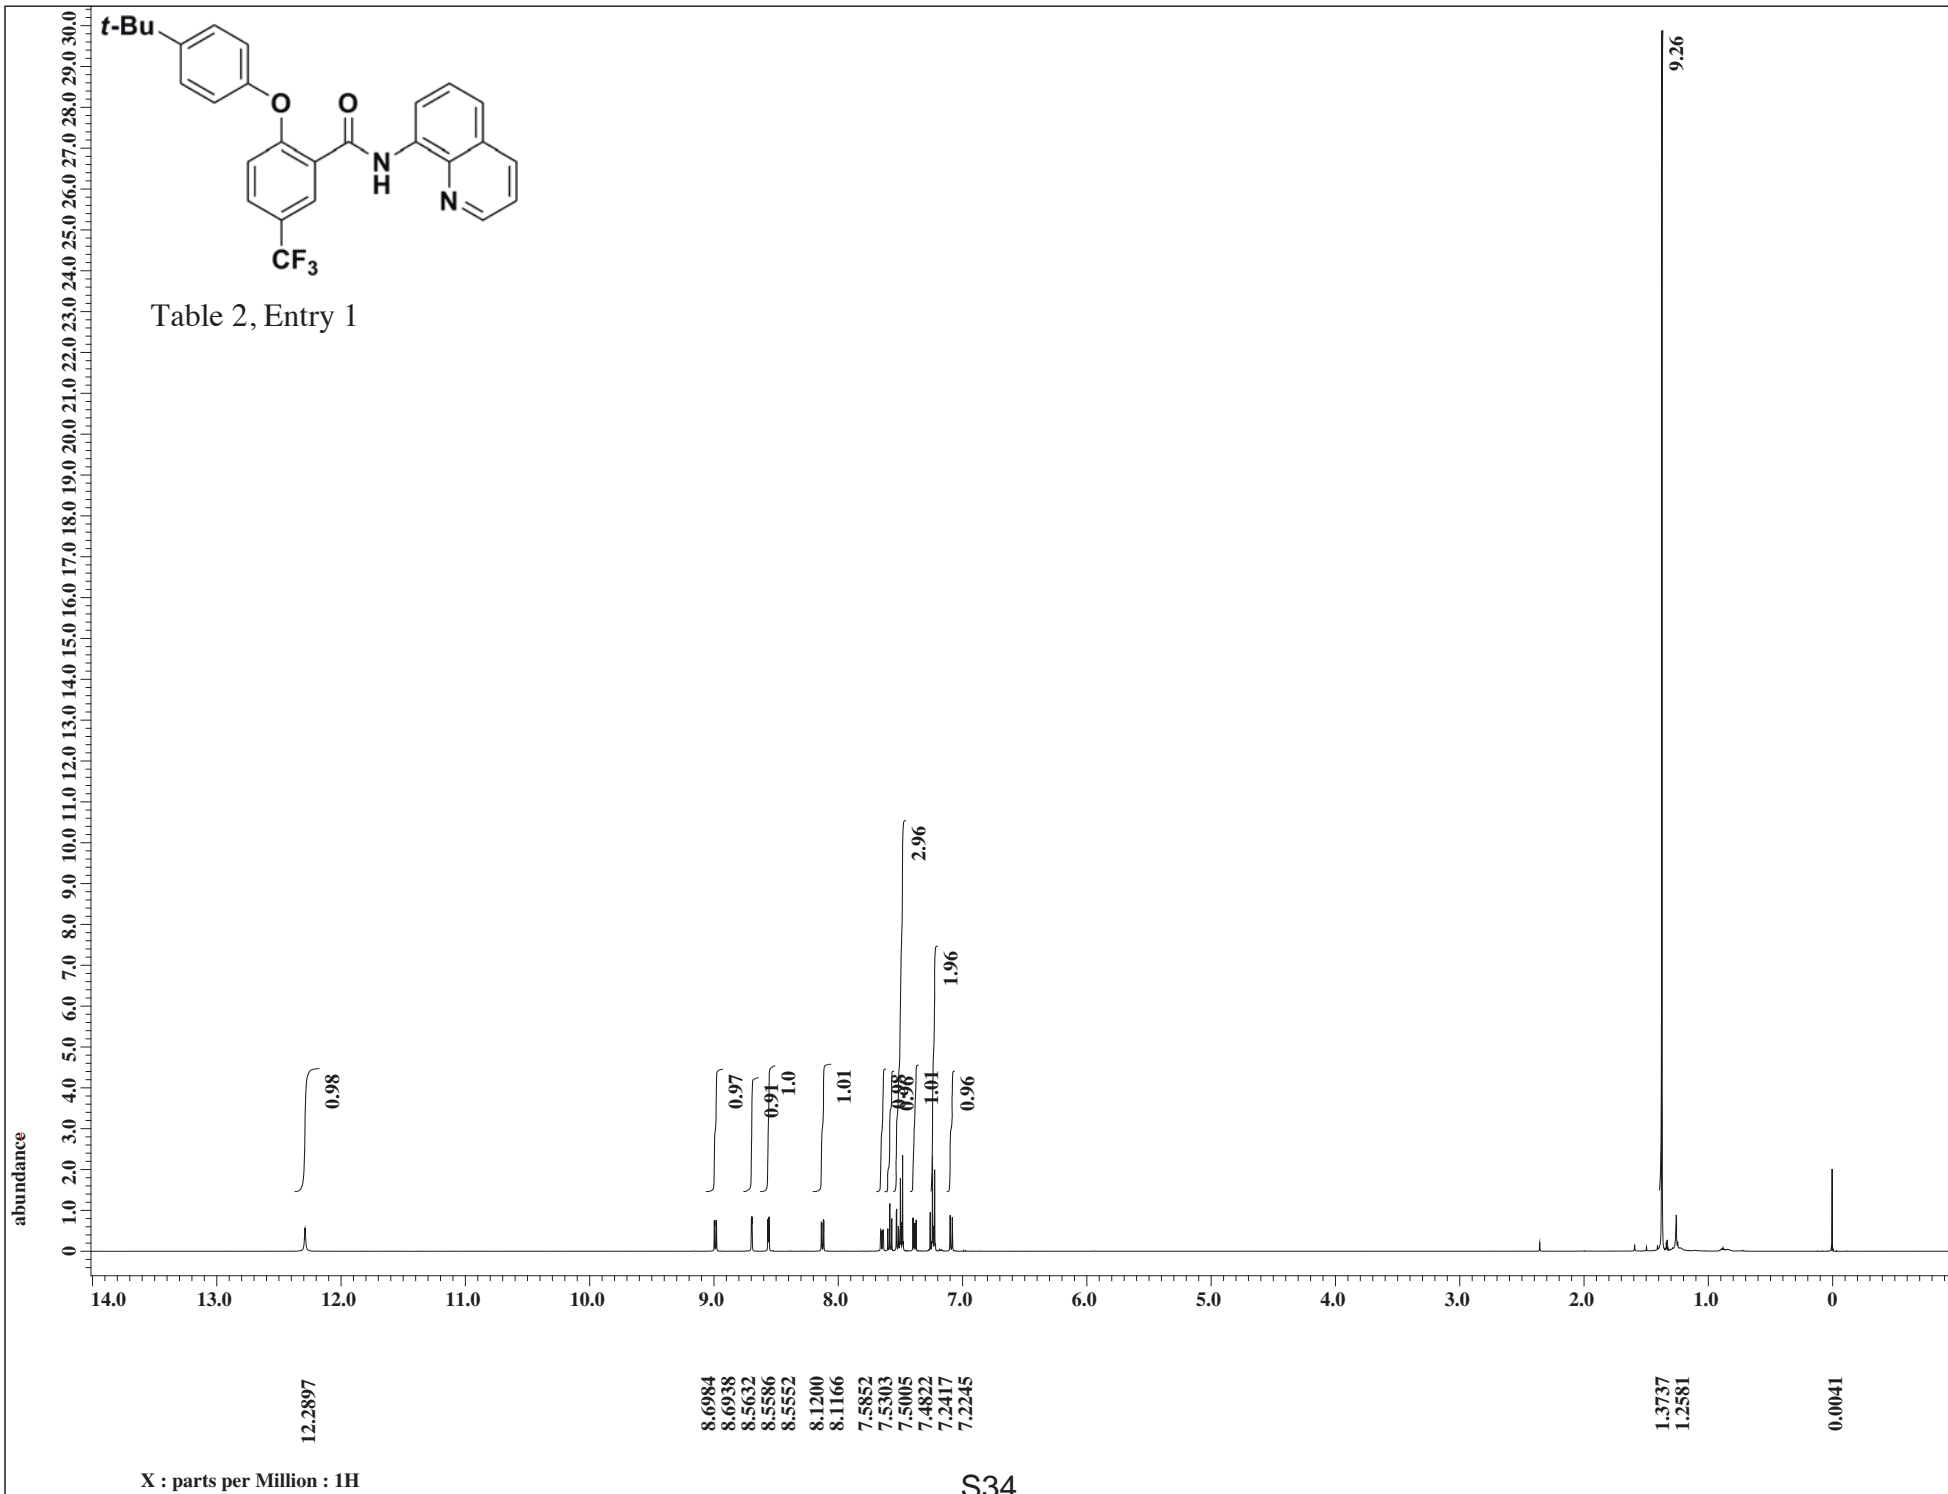

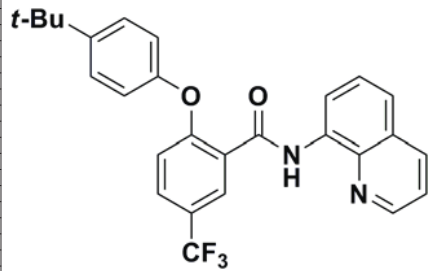

Table 2, Entry 1

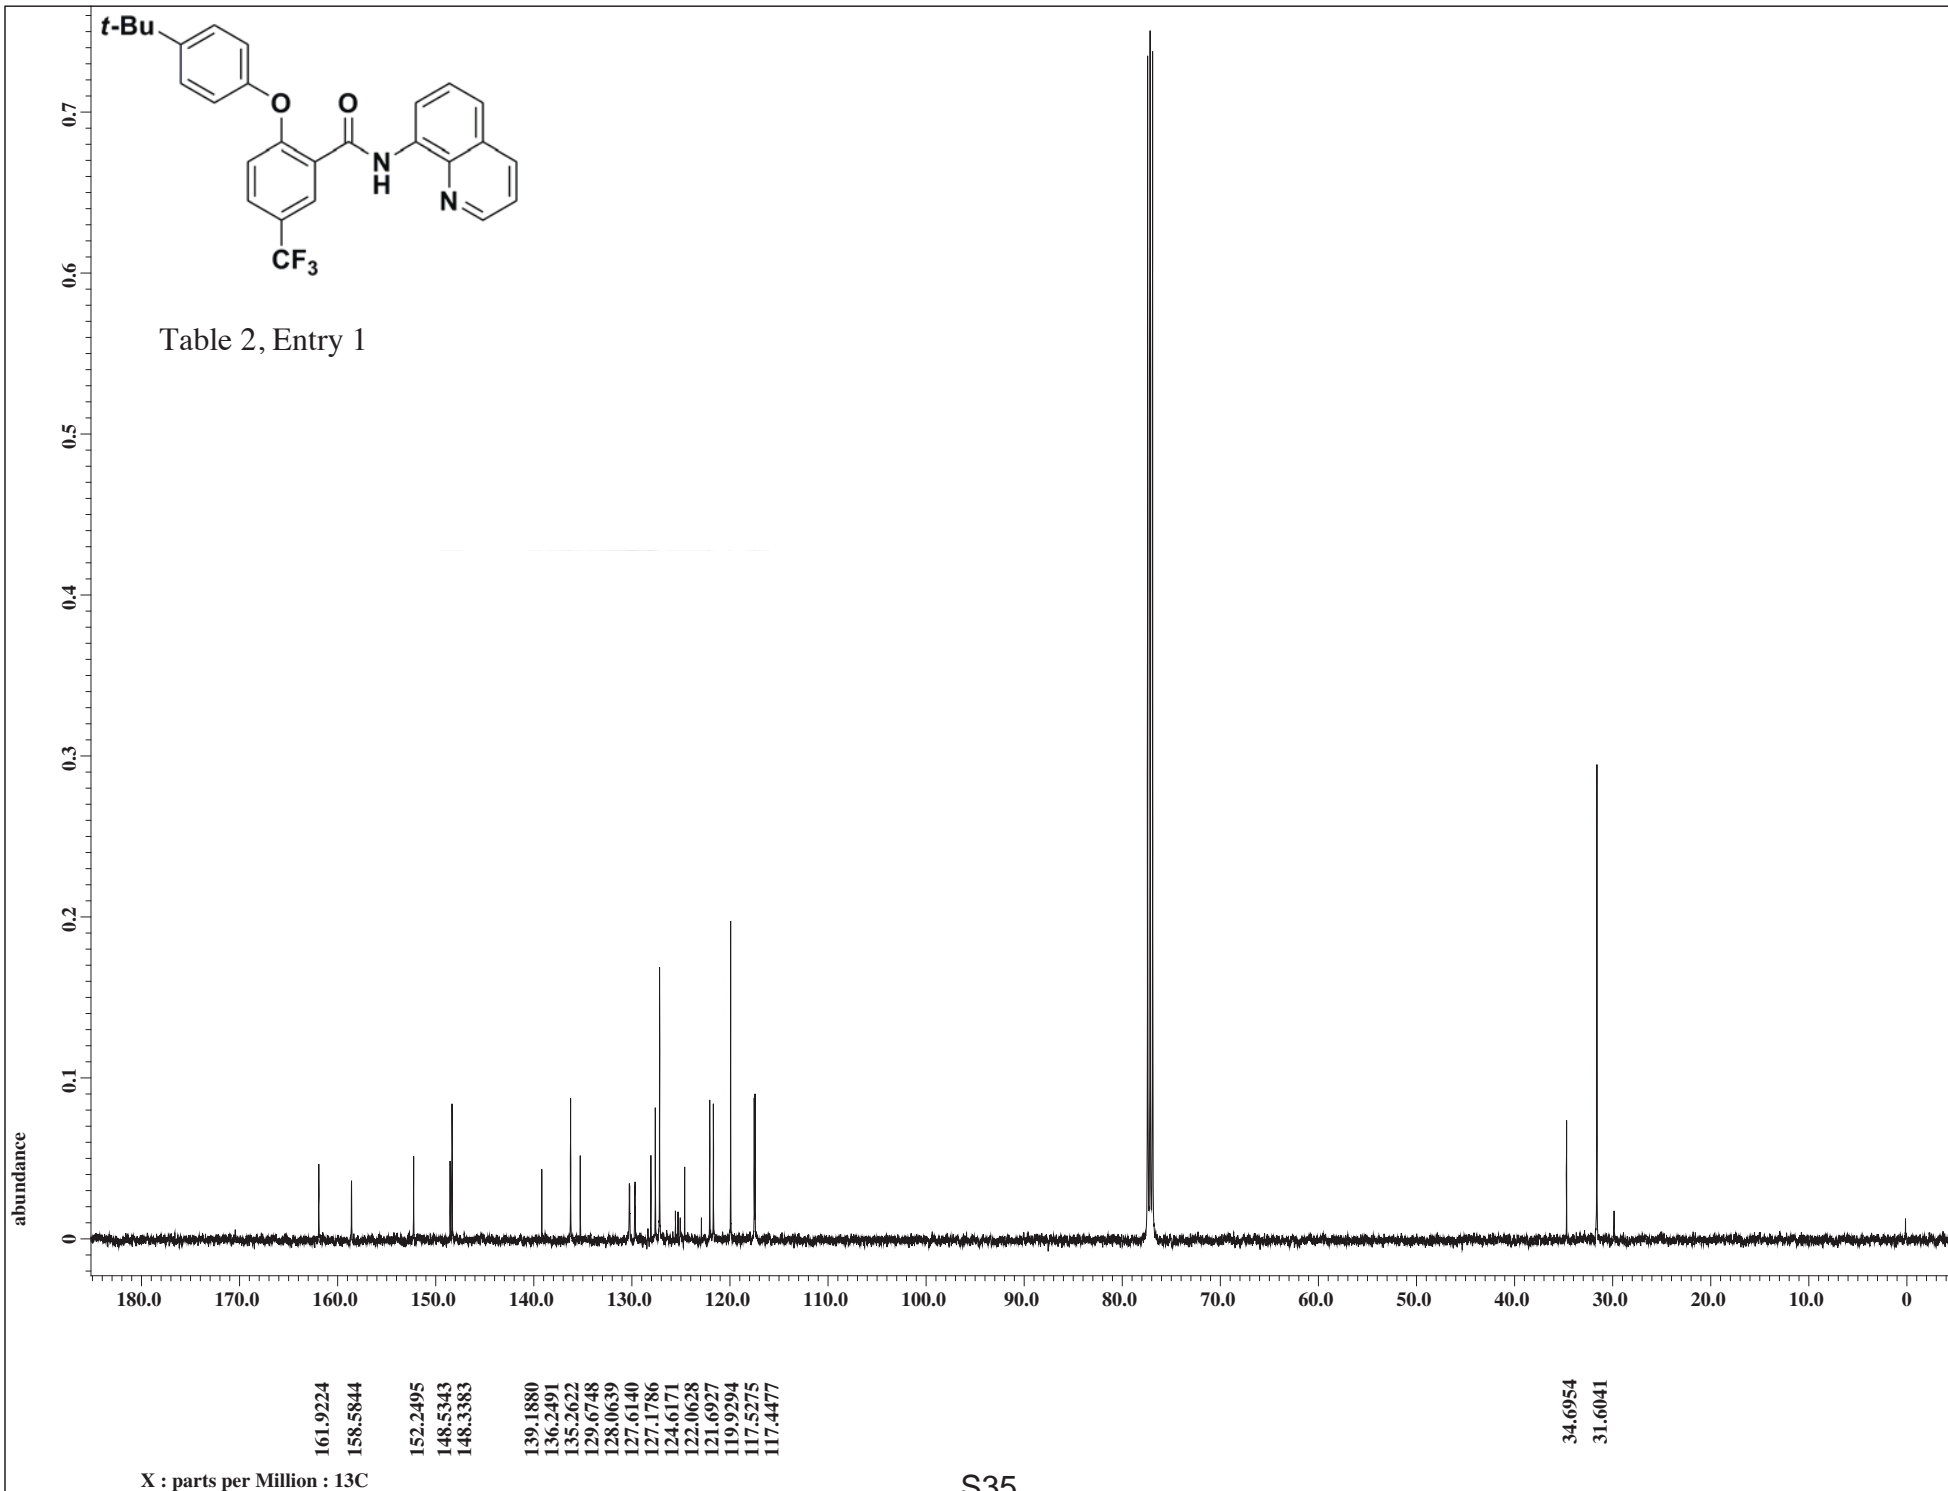

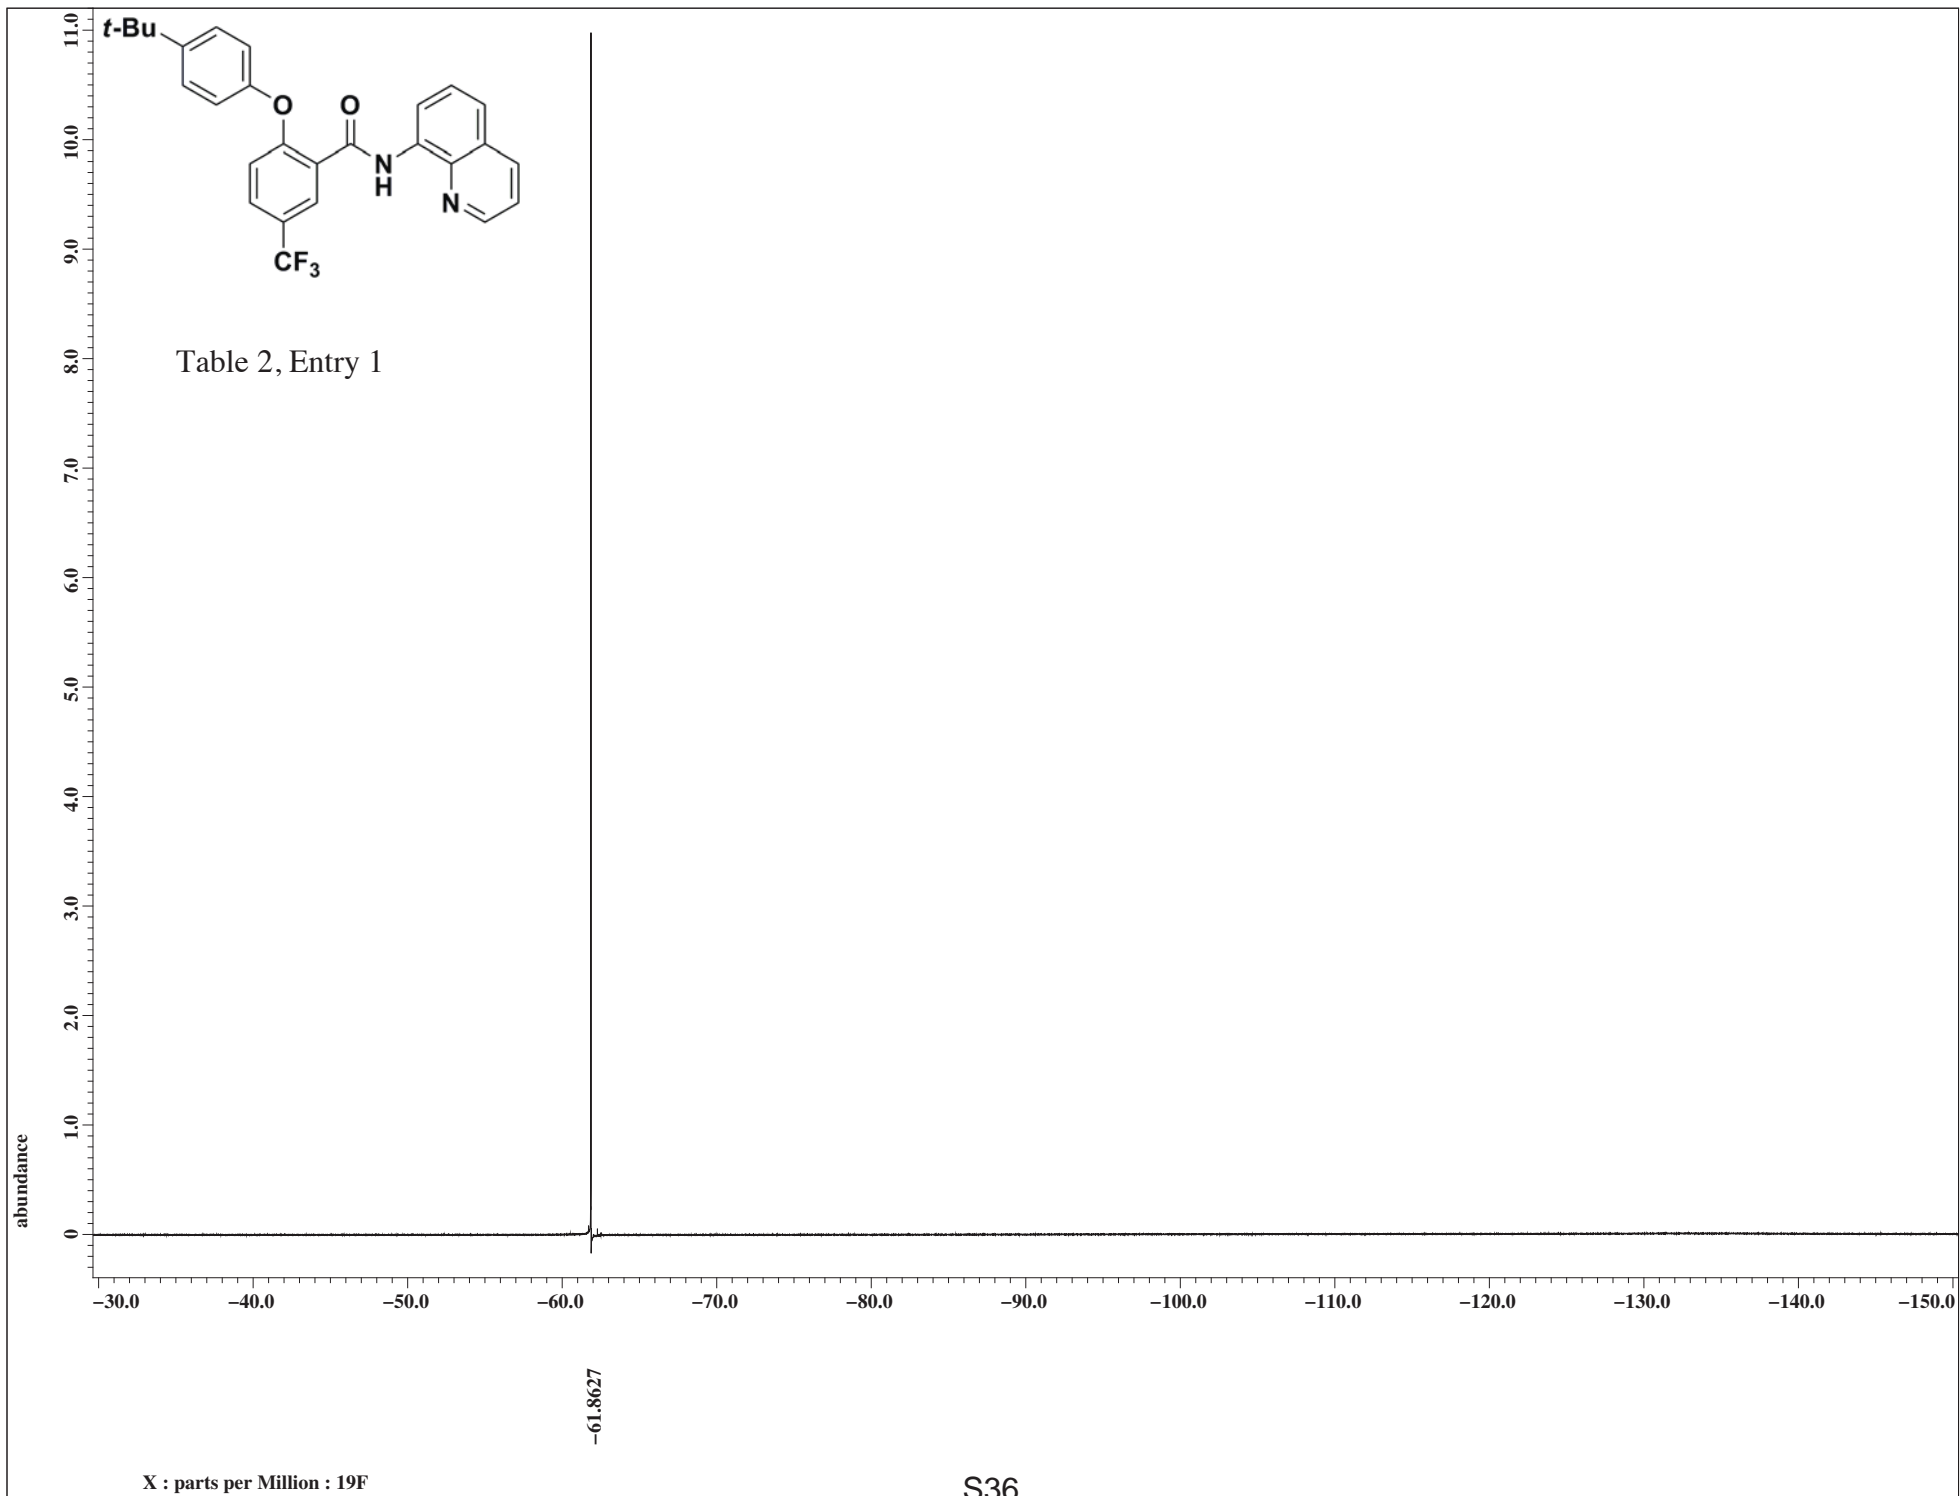

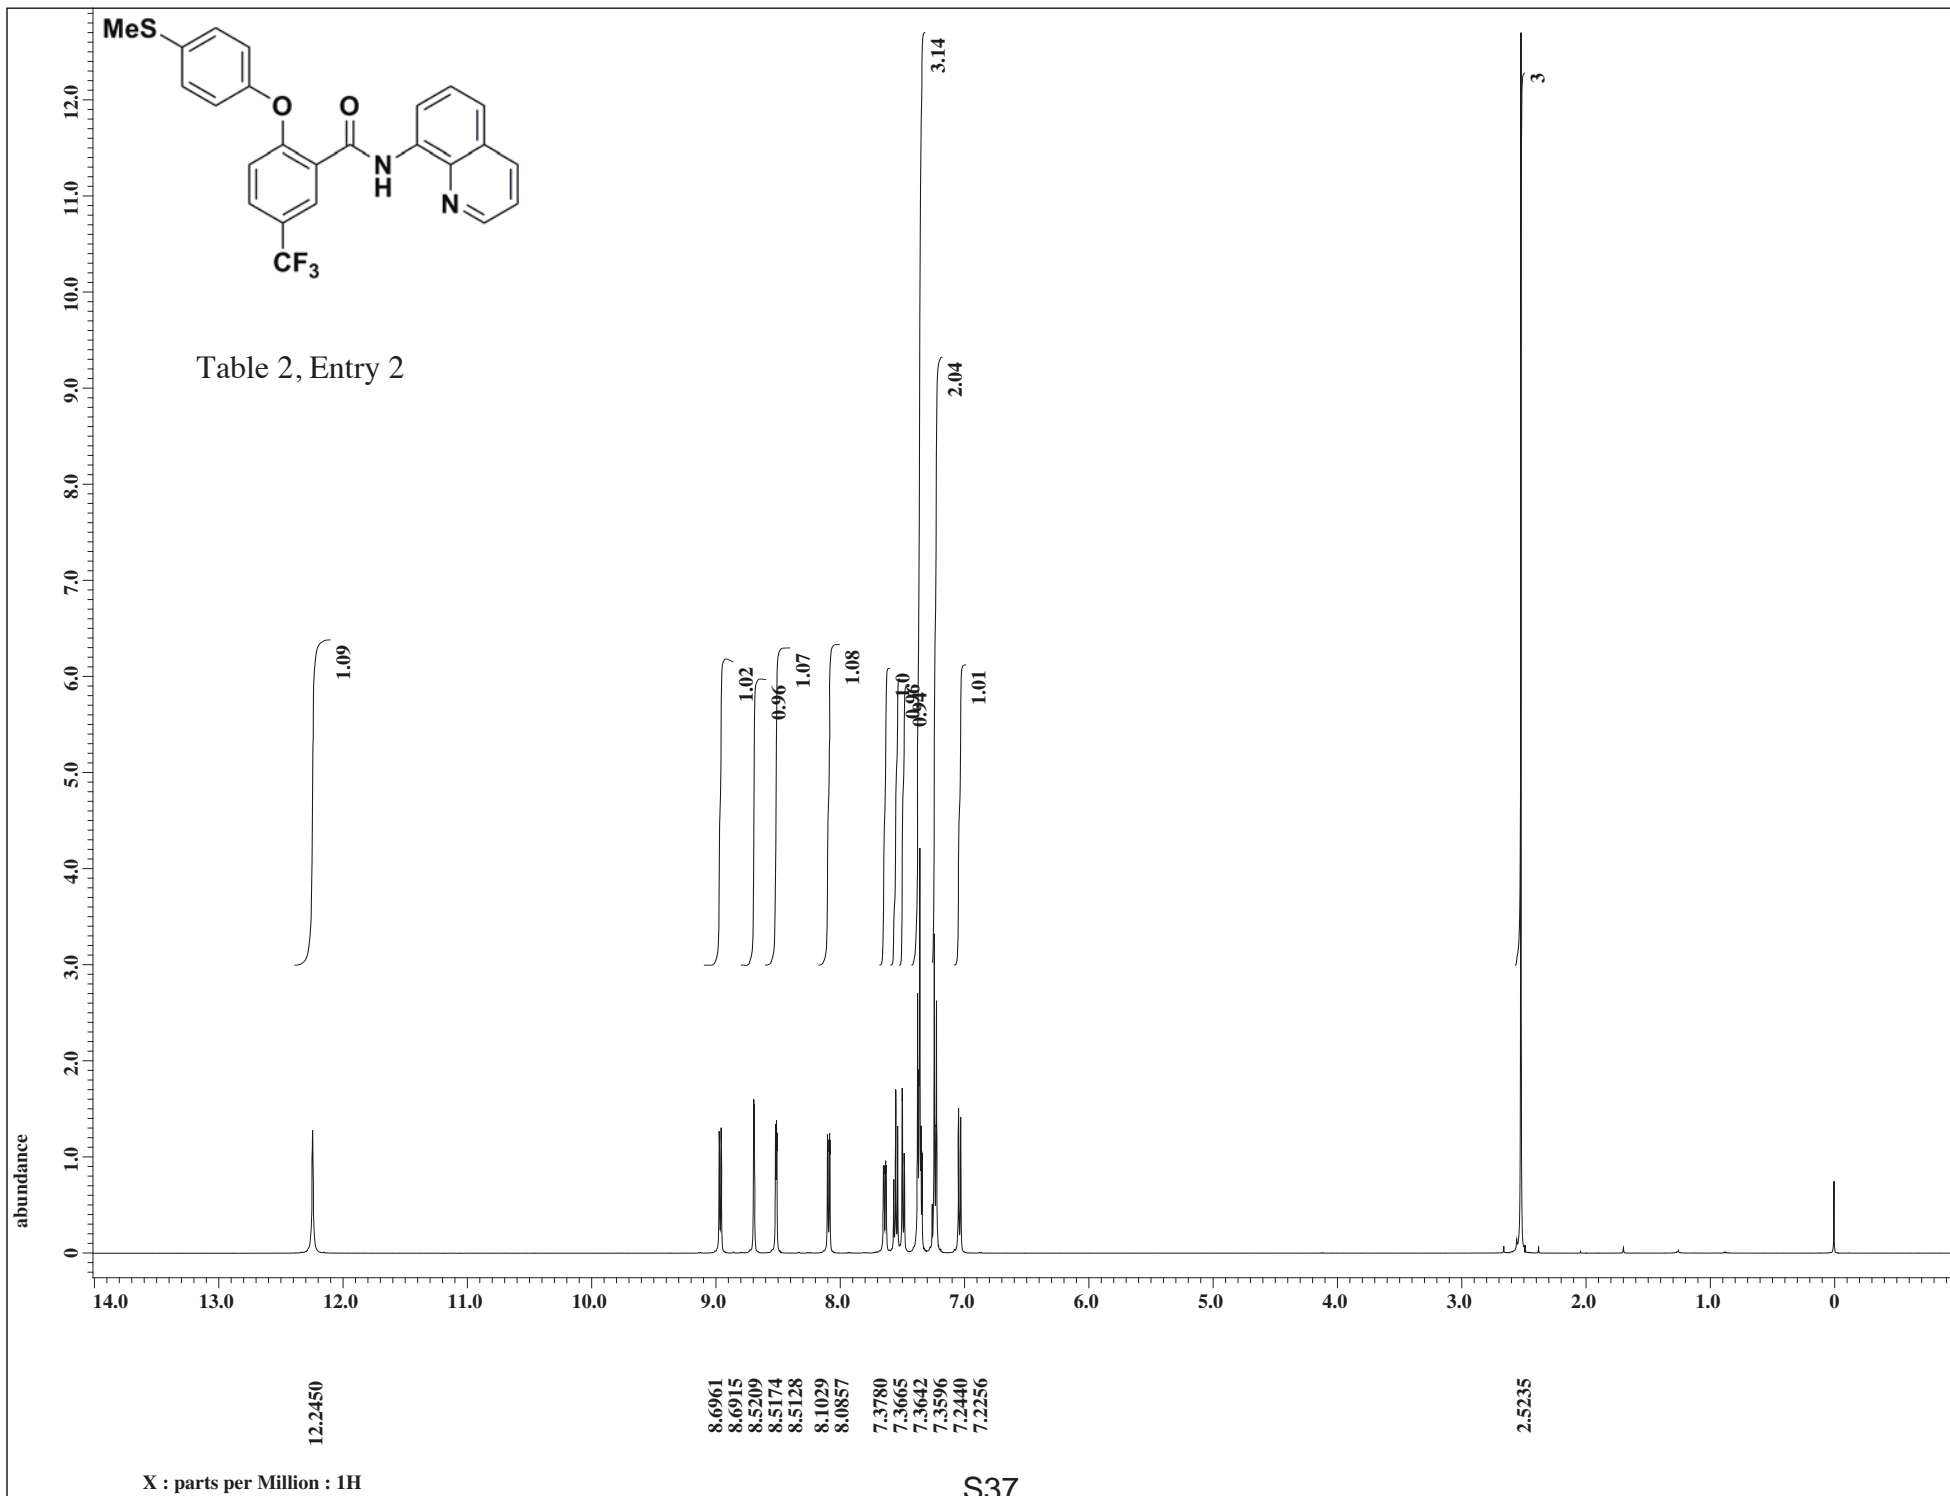

X : parts per Million : 1H

S37

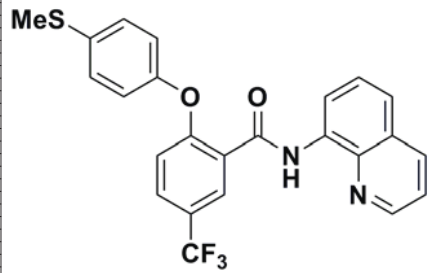

Table 2, Entry 2

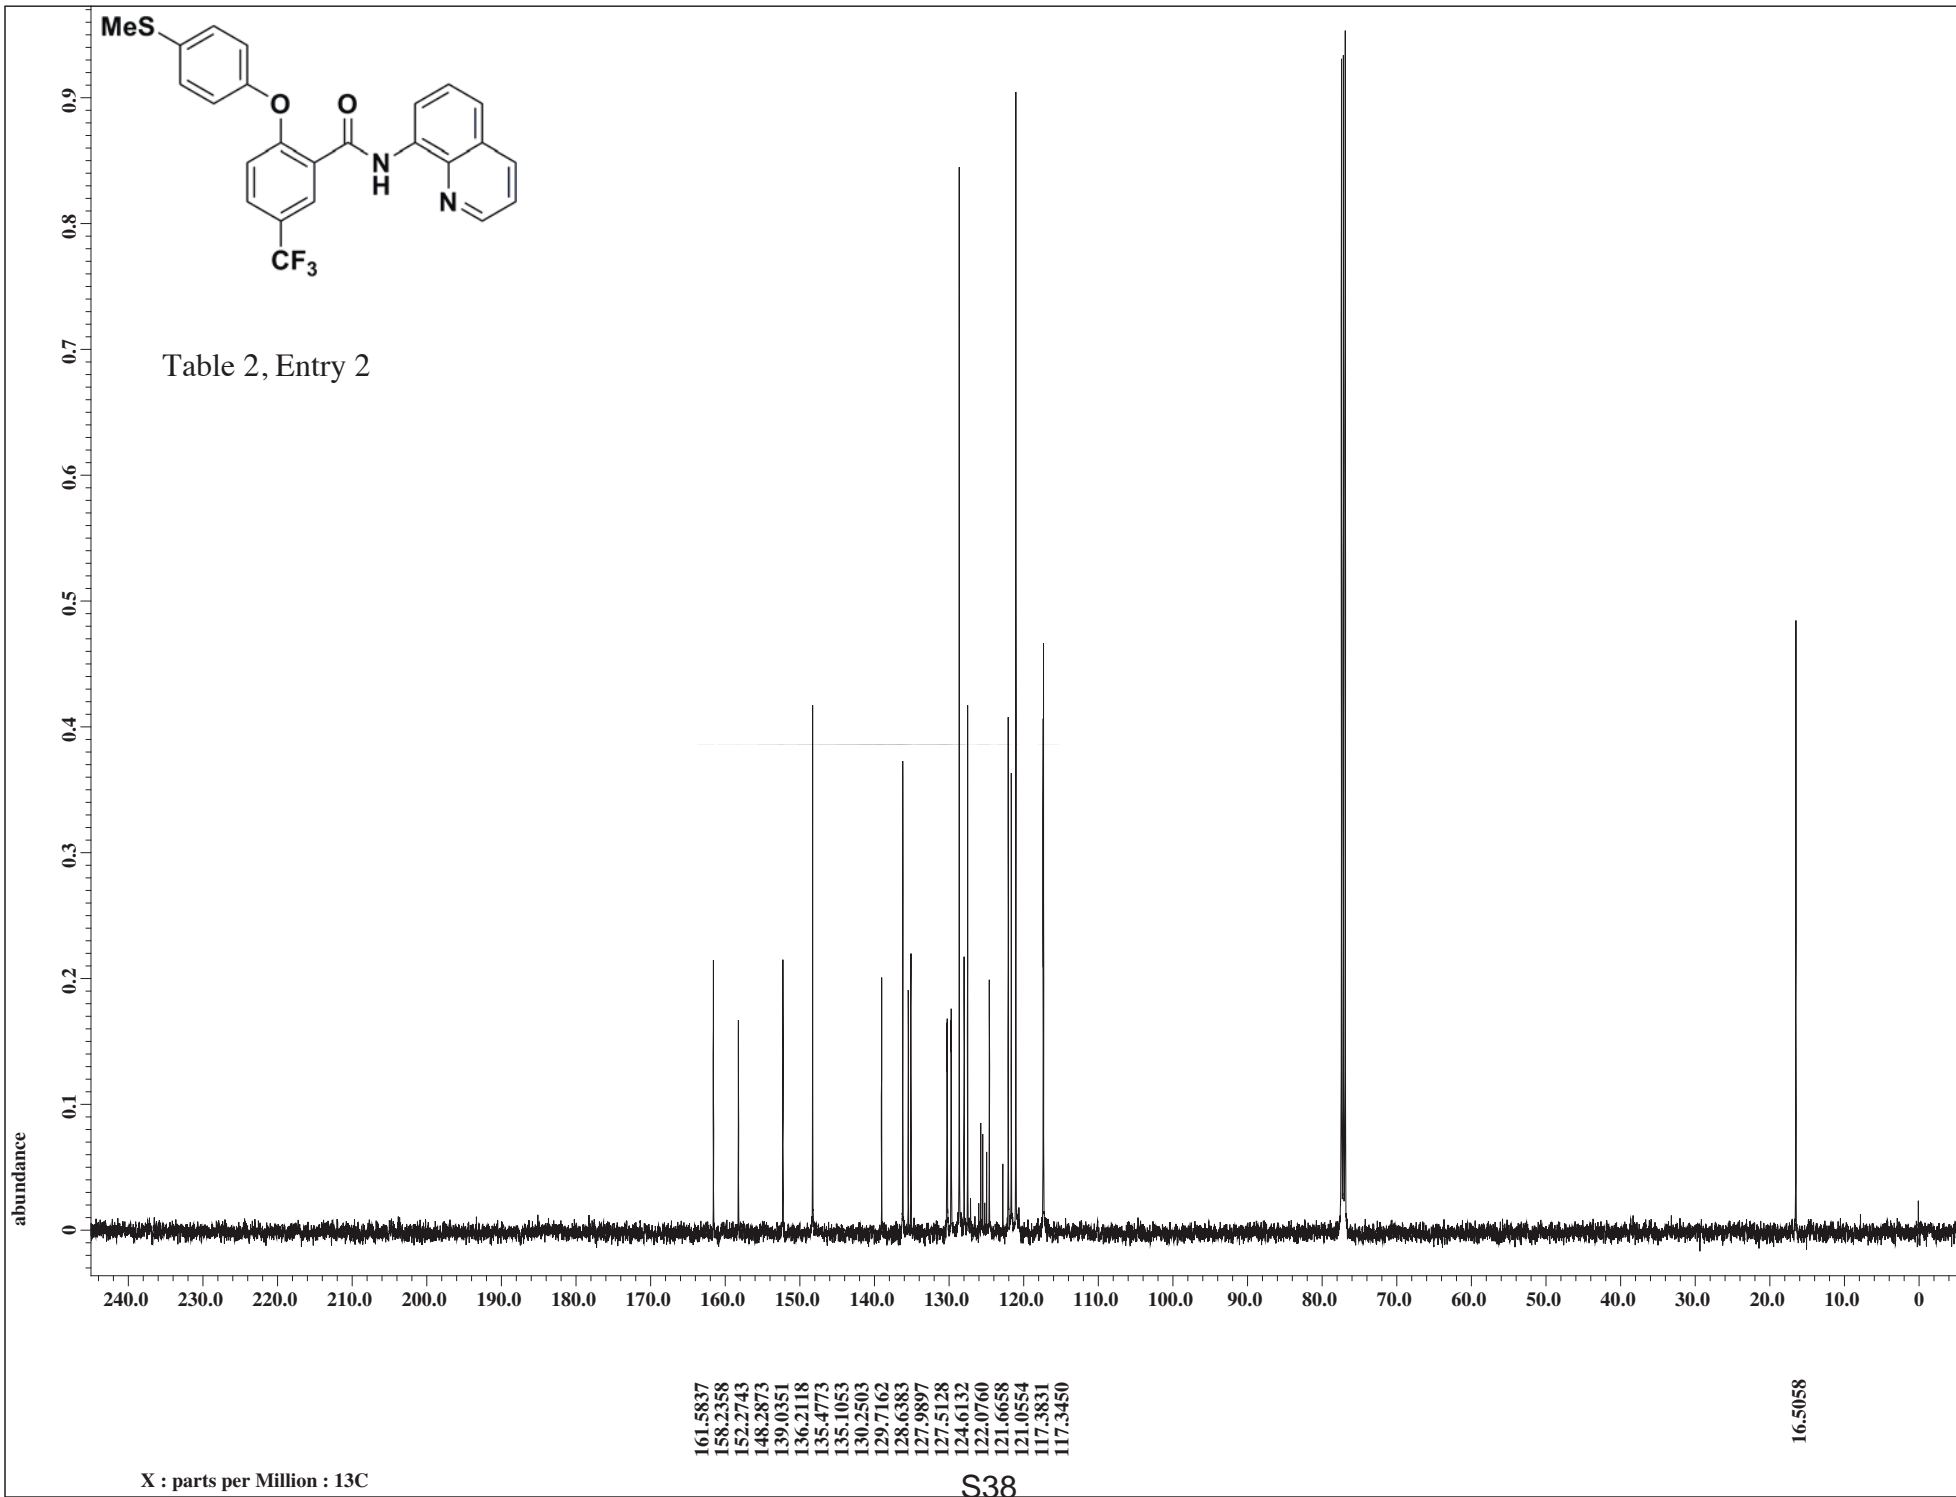

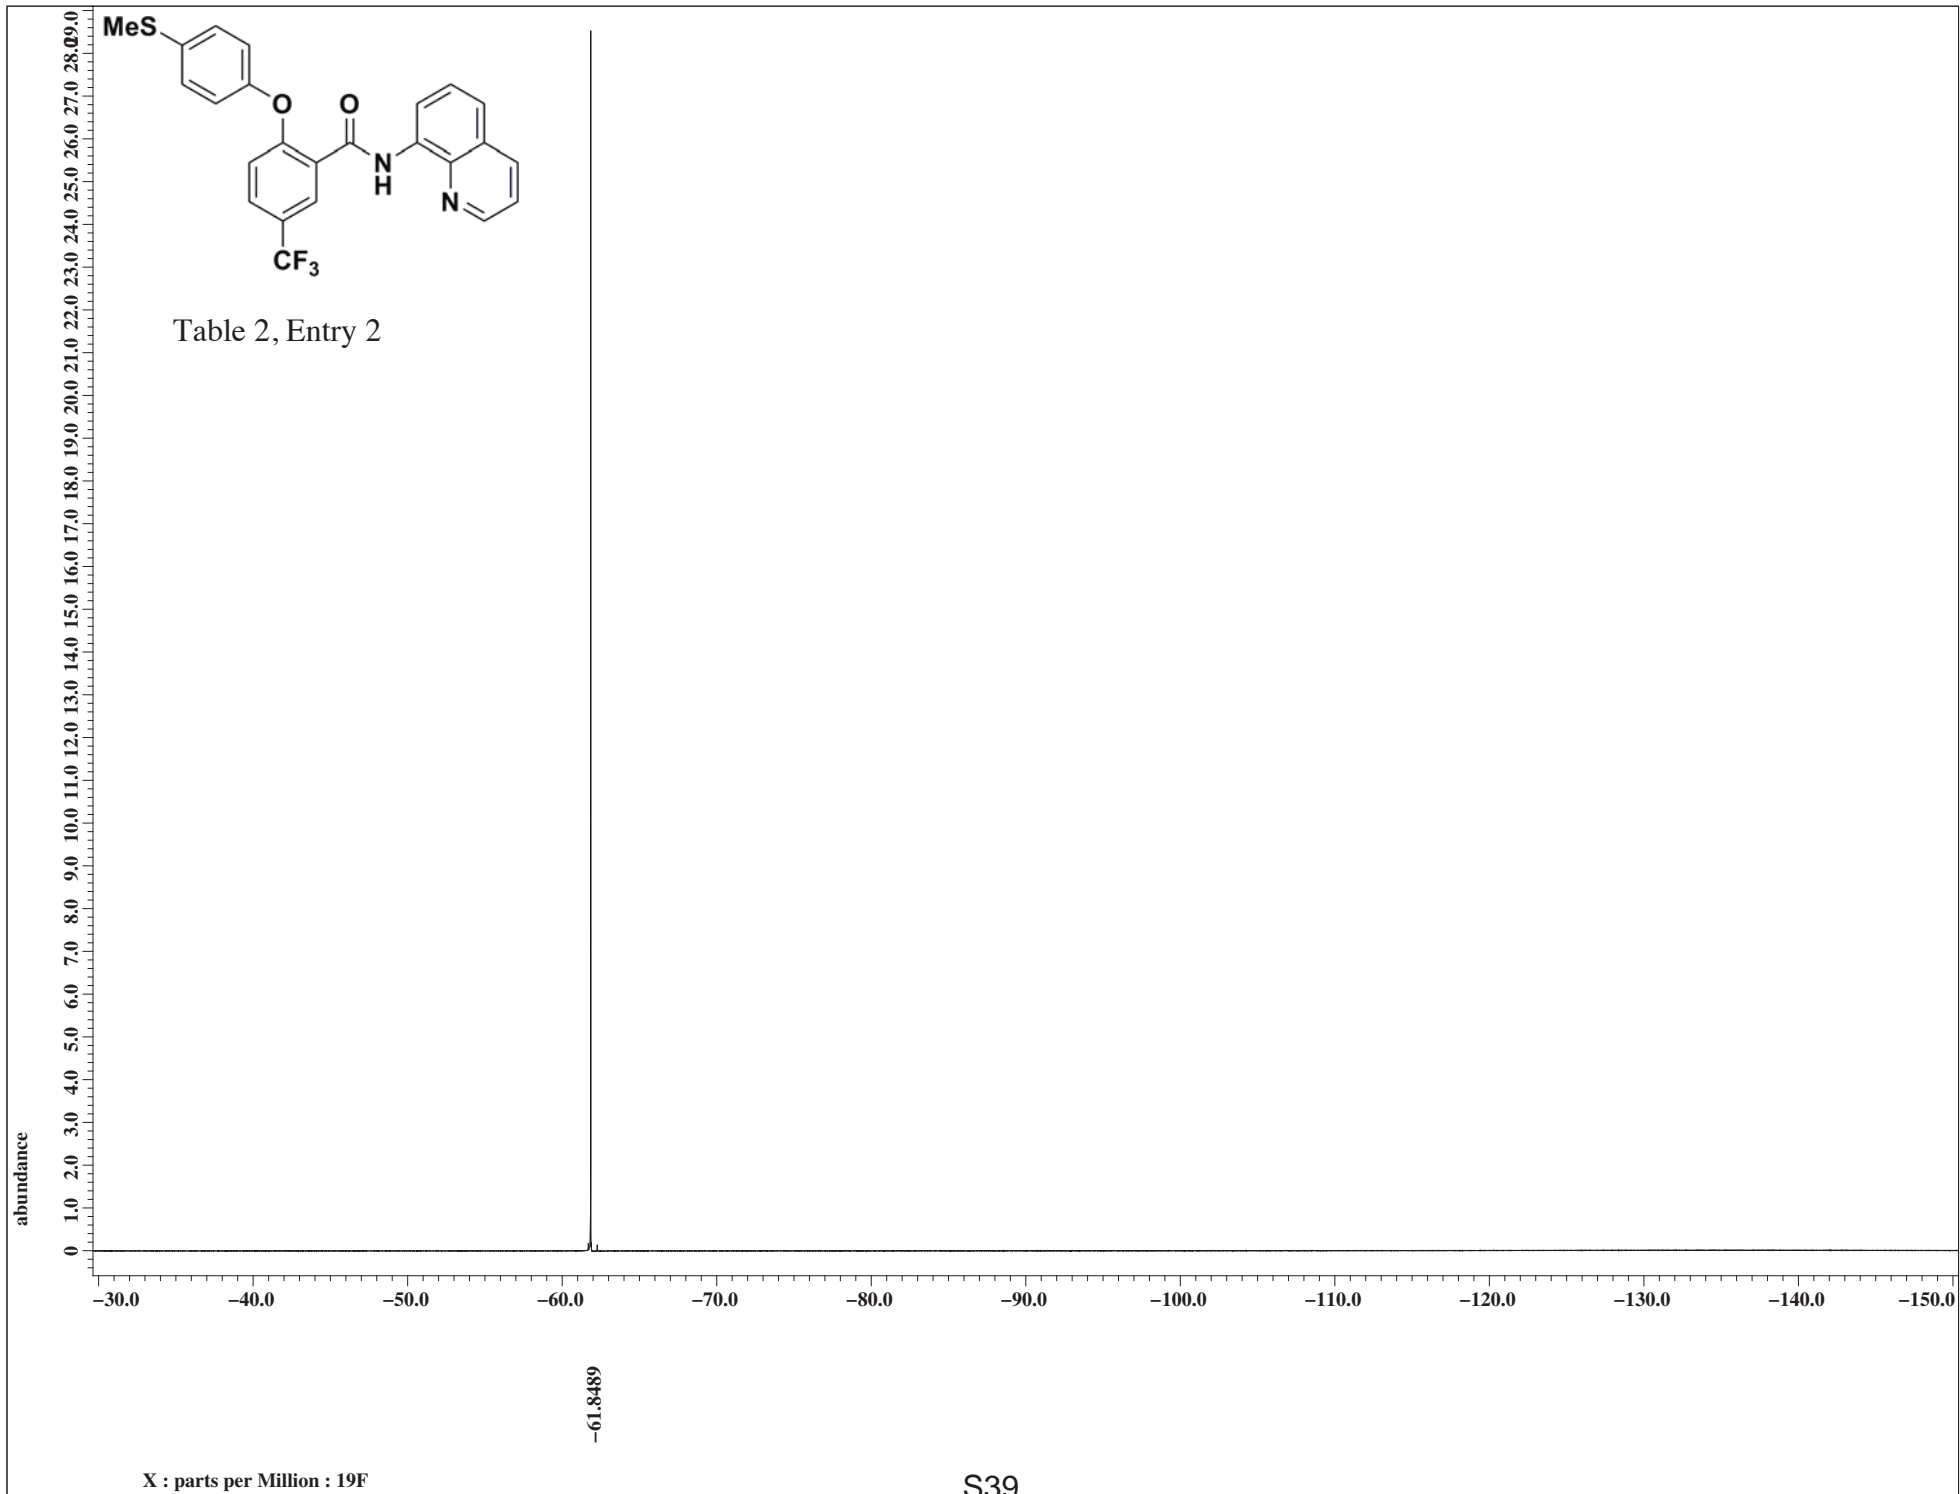

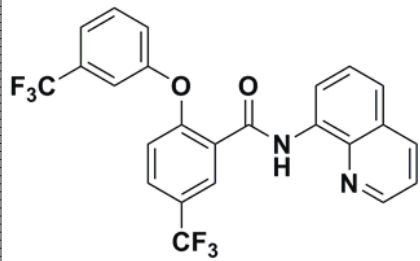

Table 2, Entry 3

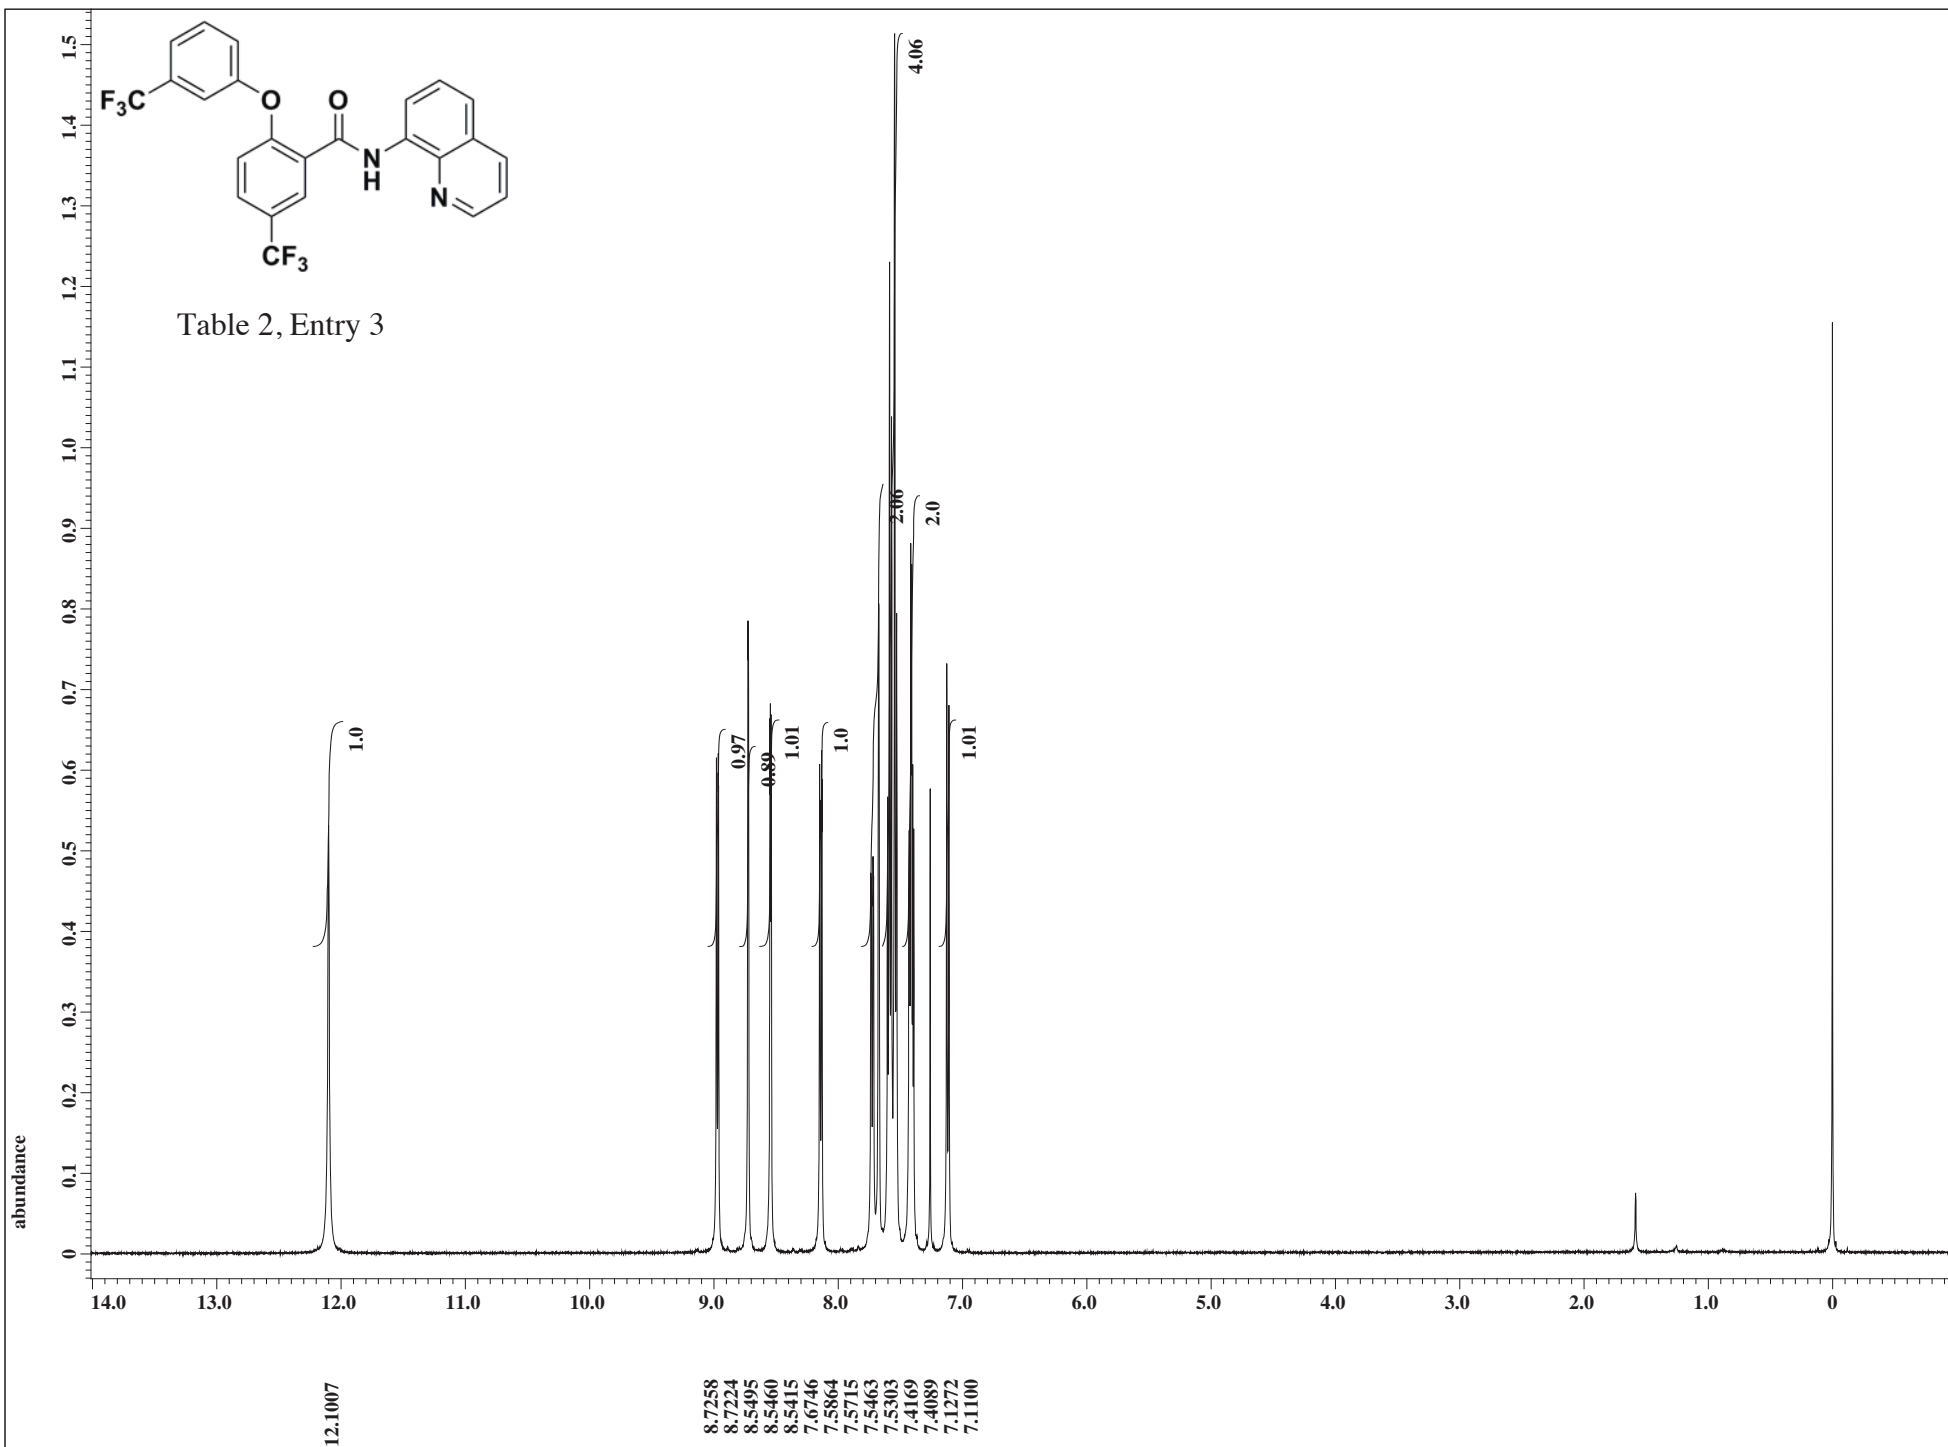

X : parts per Million : 1H

S40



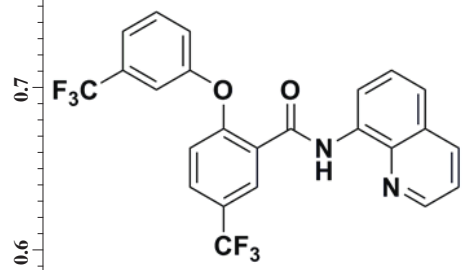

Table 2, Entry 3

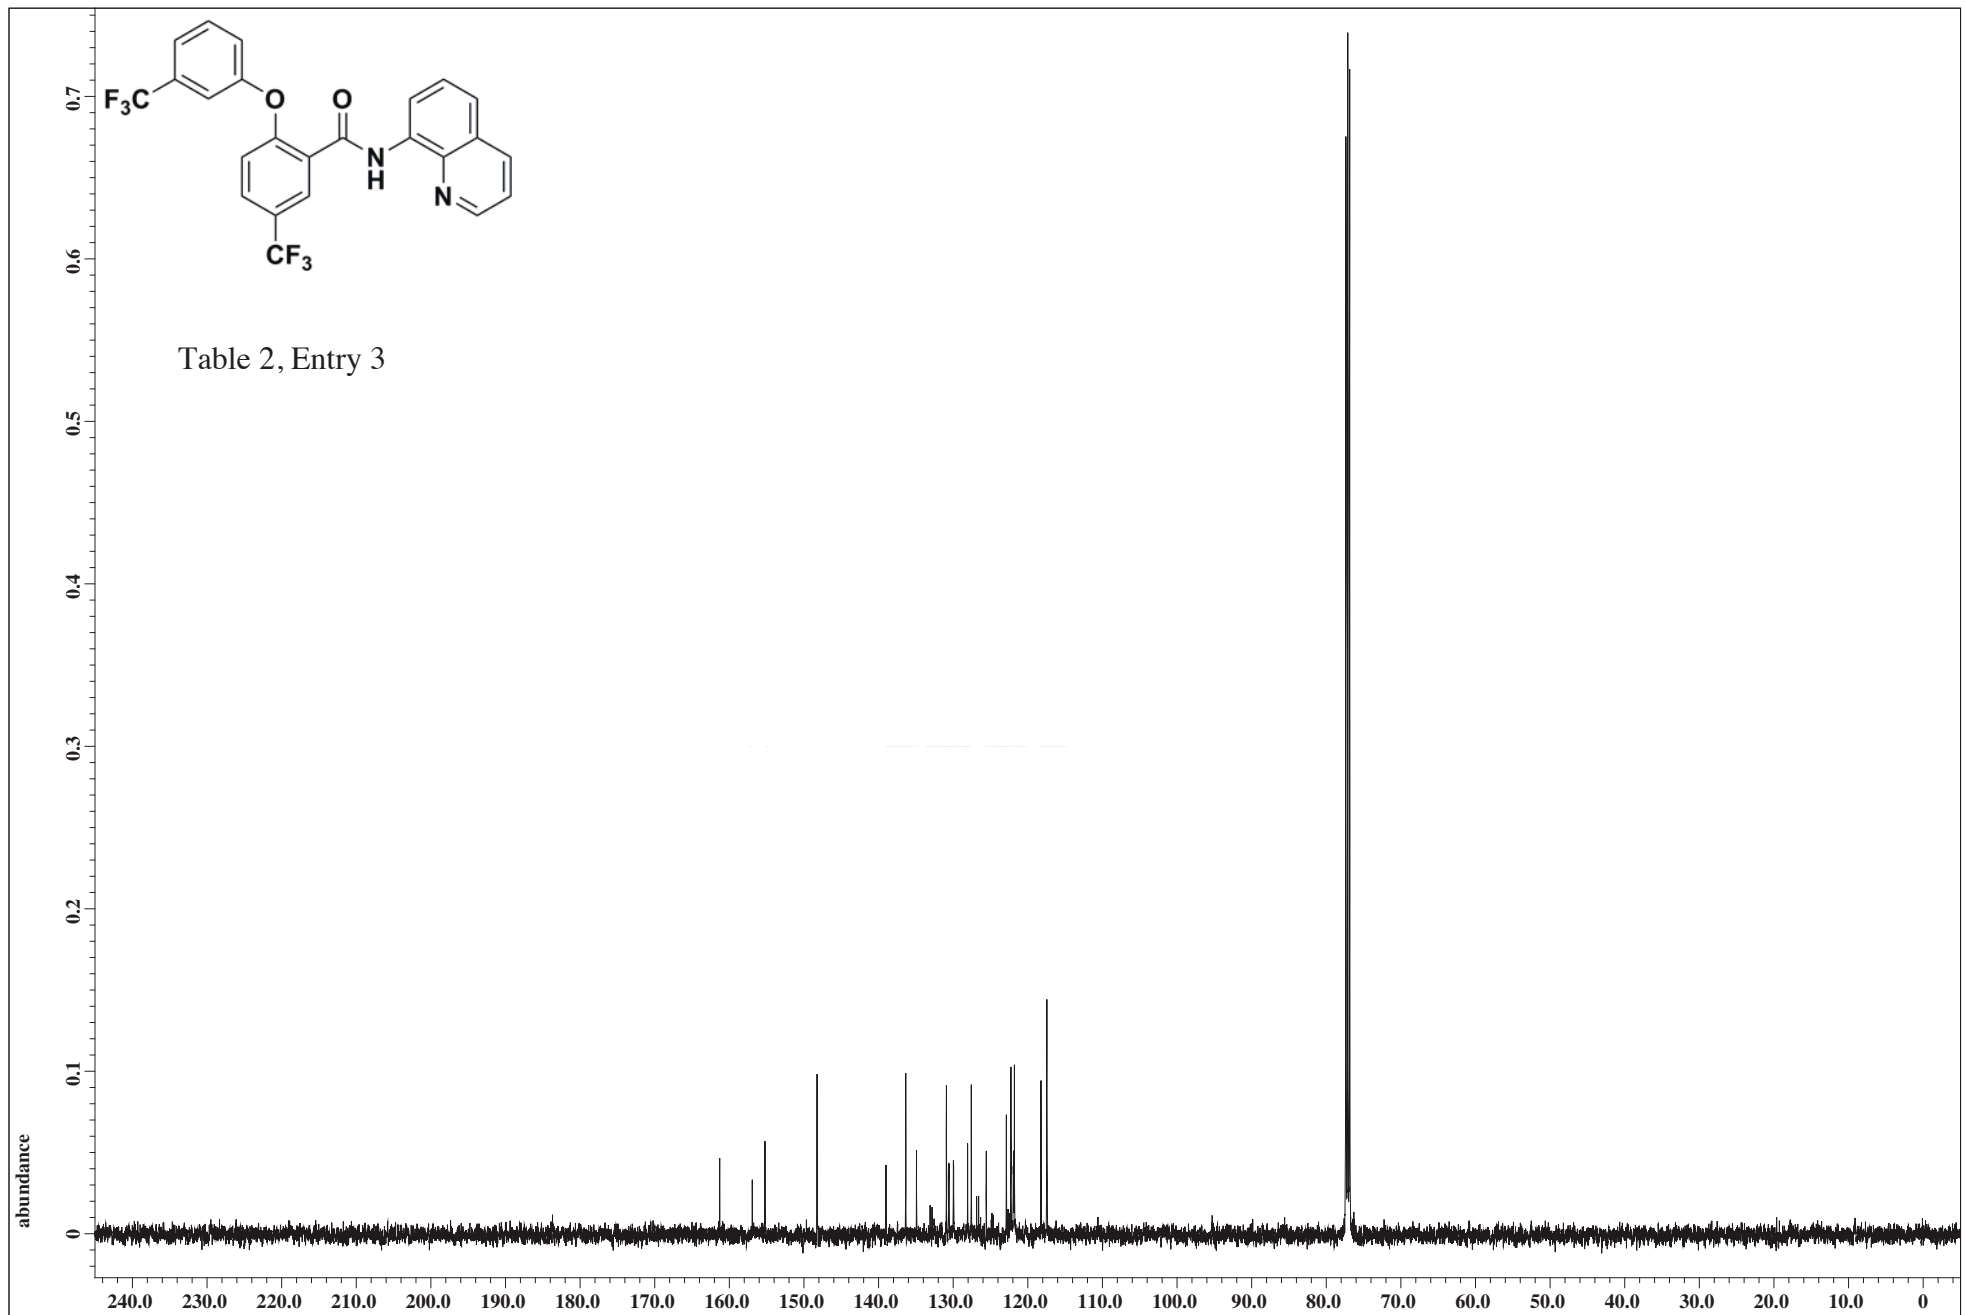

- 161.2914
- 156.9229
- 155.2250
- 148.2430
- 136.3582
- 134.9179
- 130.9023
- 128.0694
- 127.5734
- 122.8710
- 122.2606
- 121.7932
- 118.2354
- 117.4437

X : parts per Million : 13C

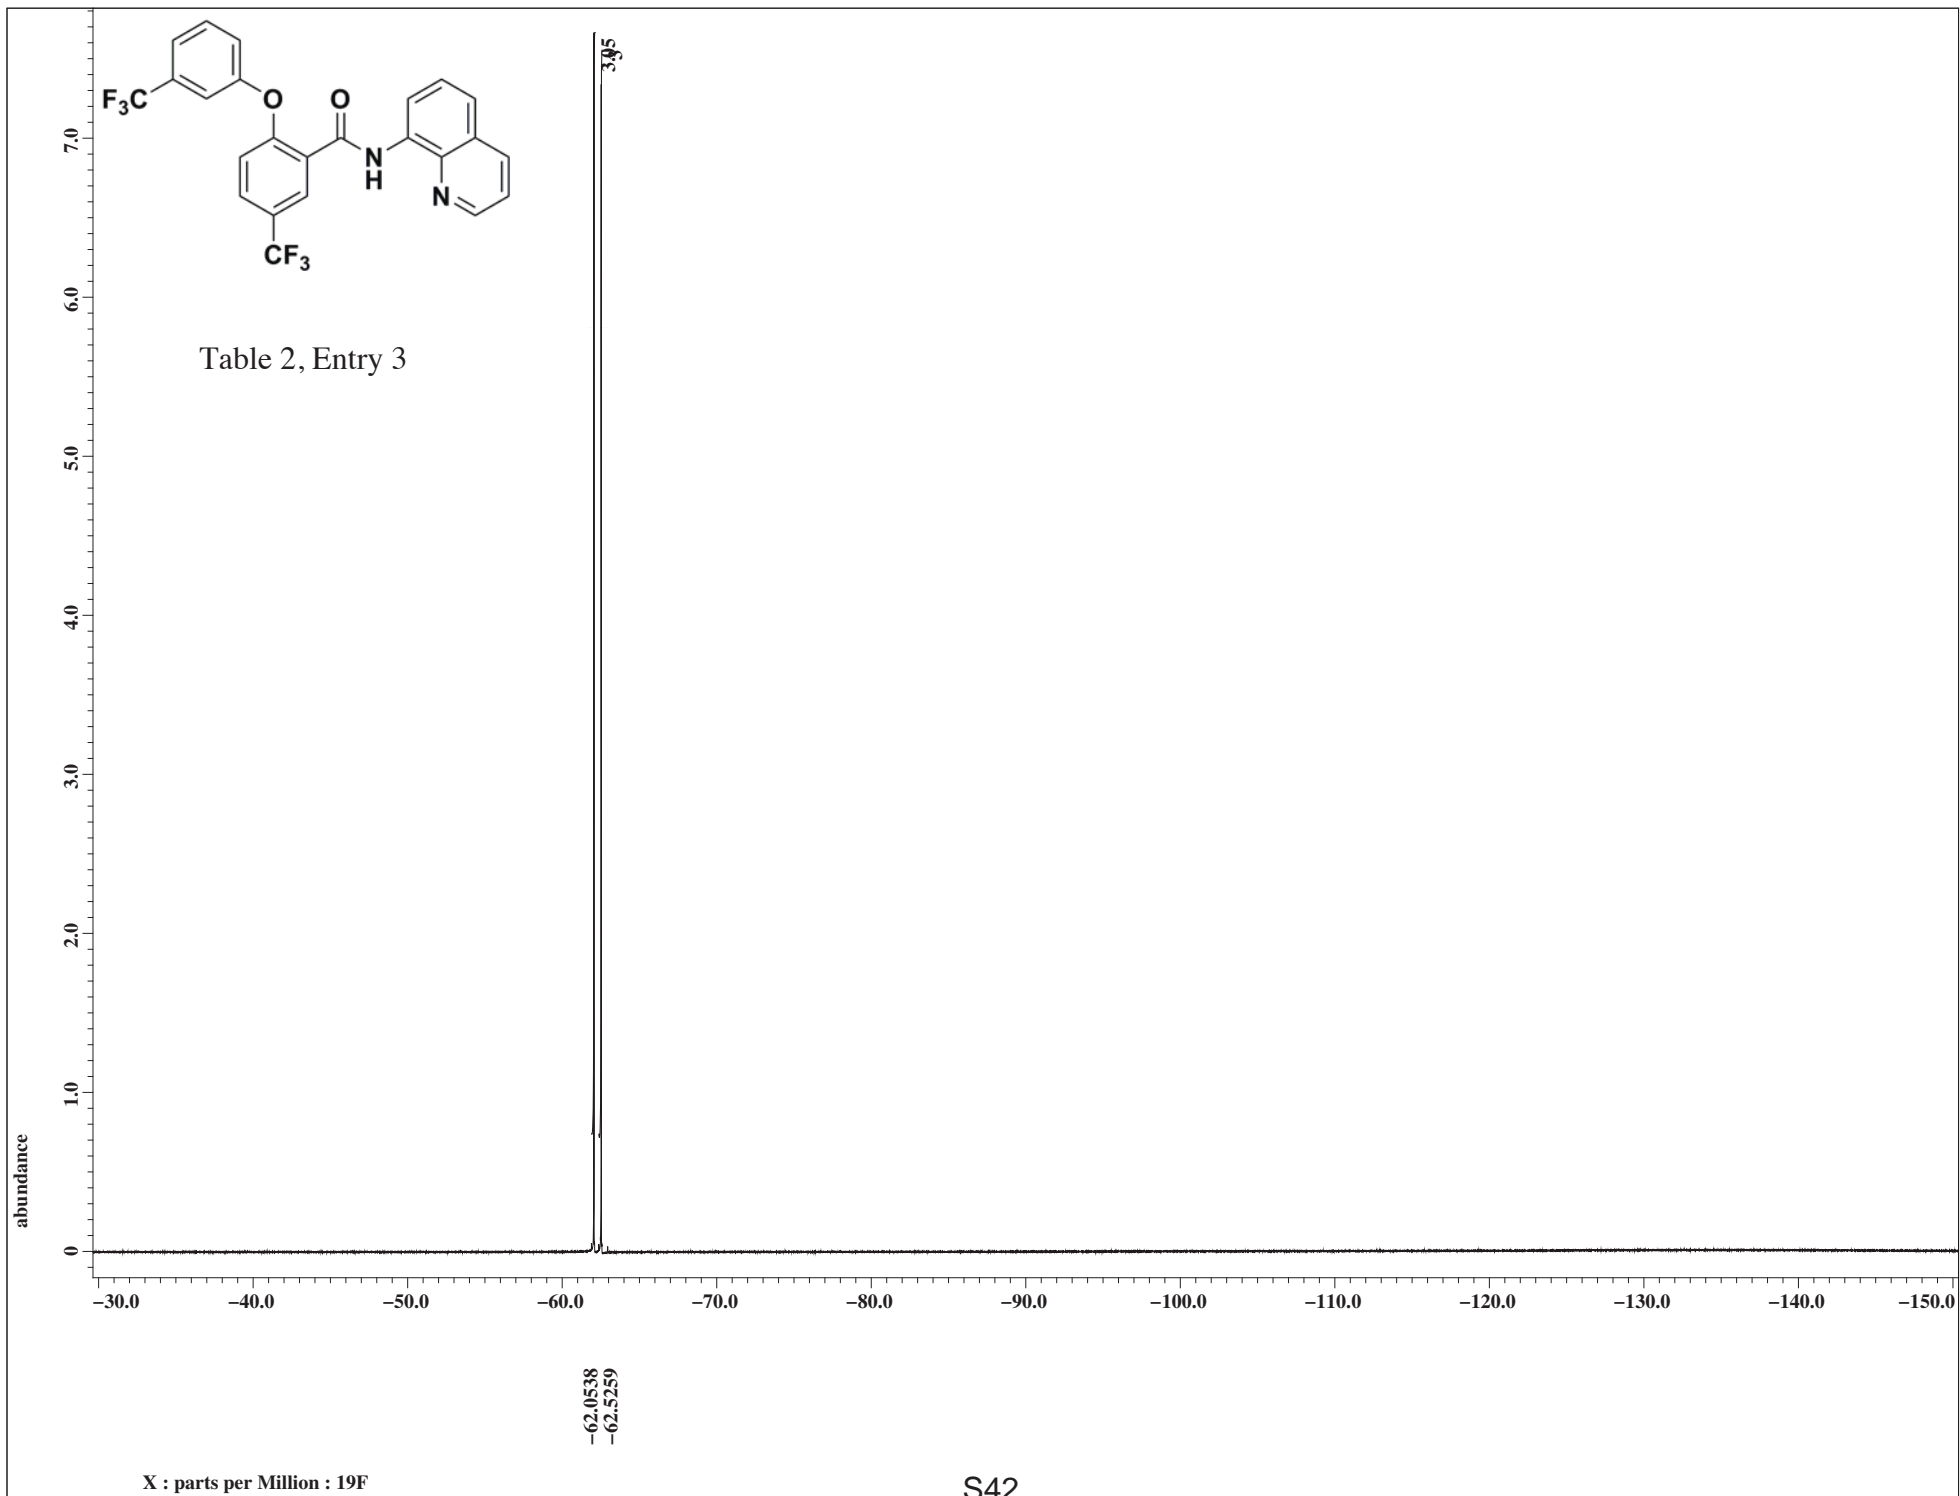

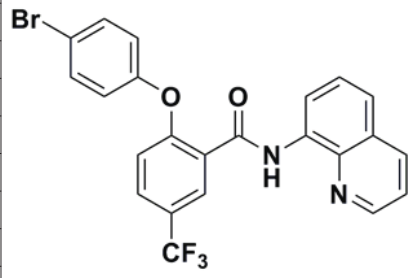

Table 2, Entry 4

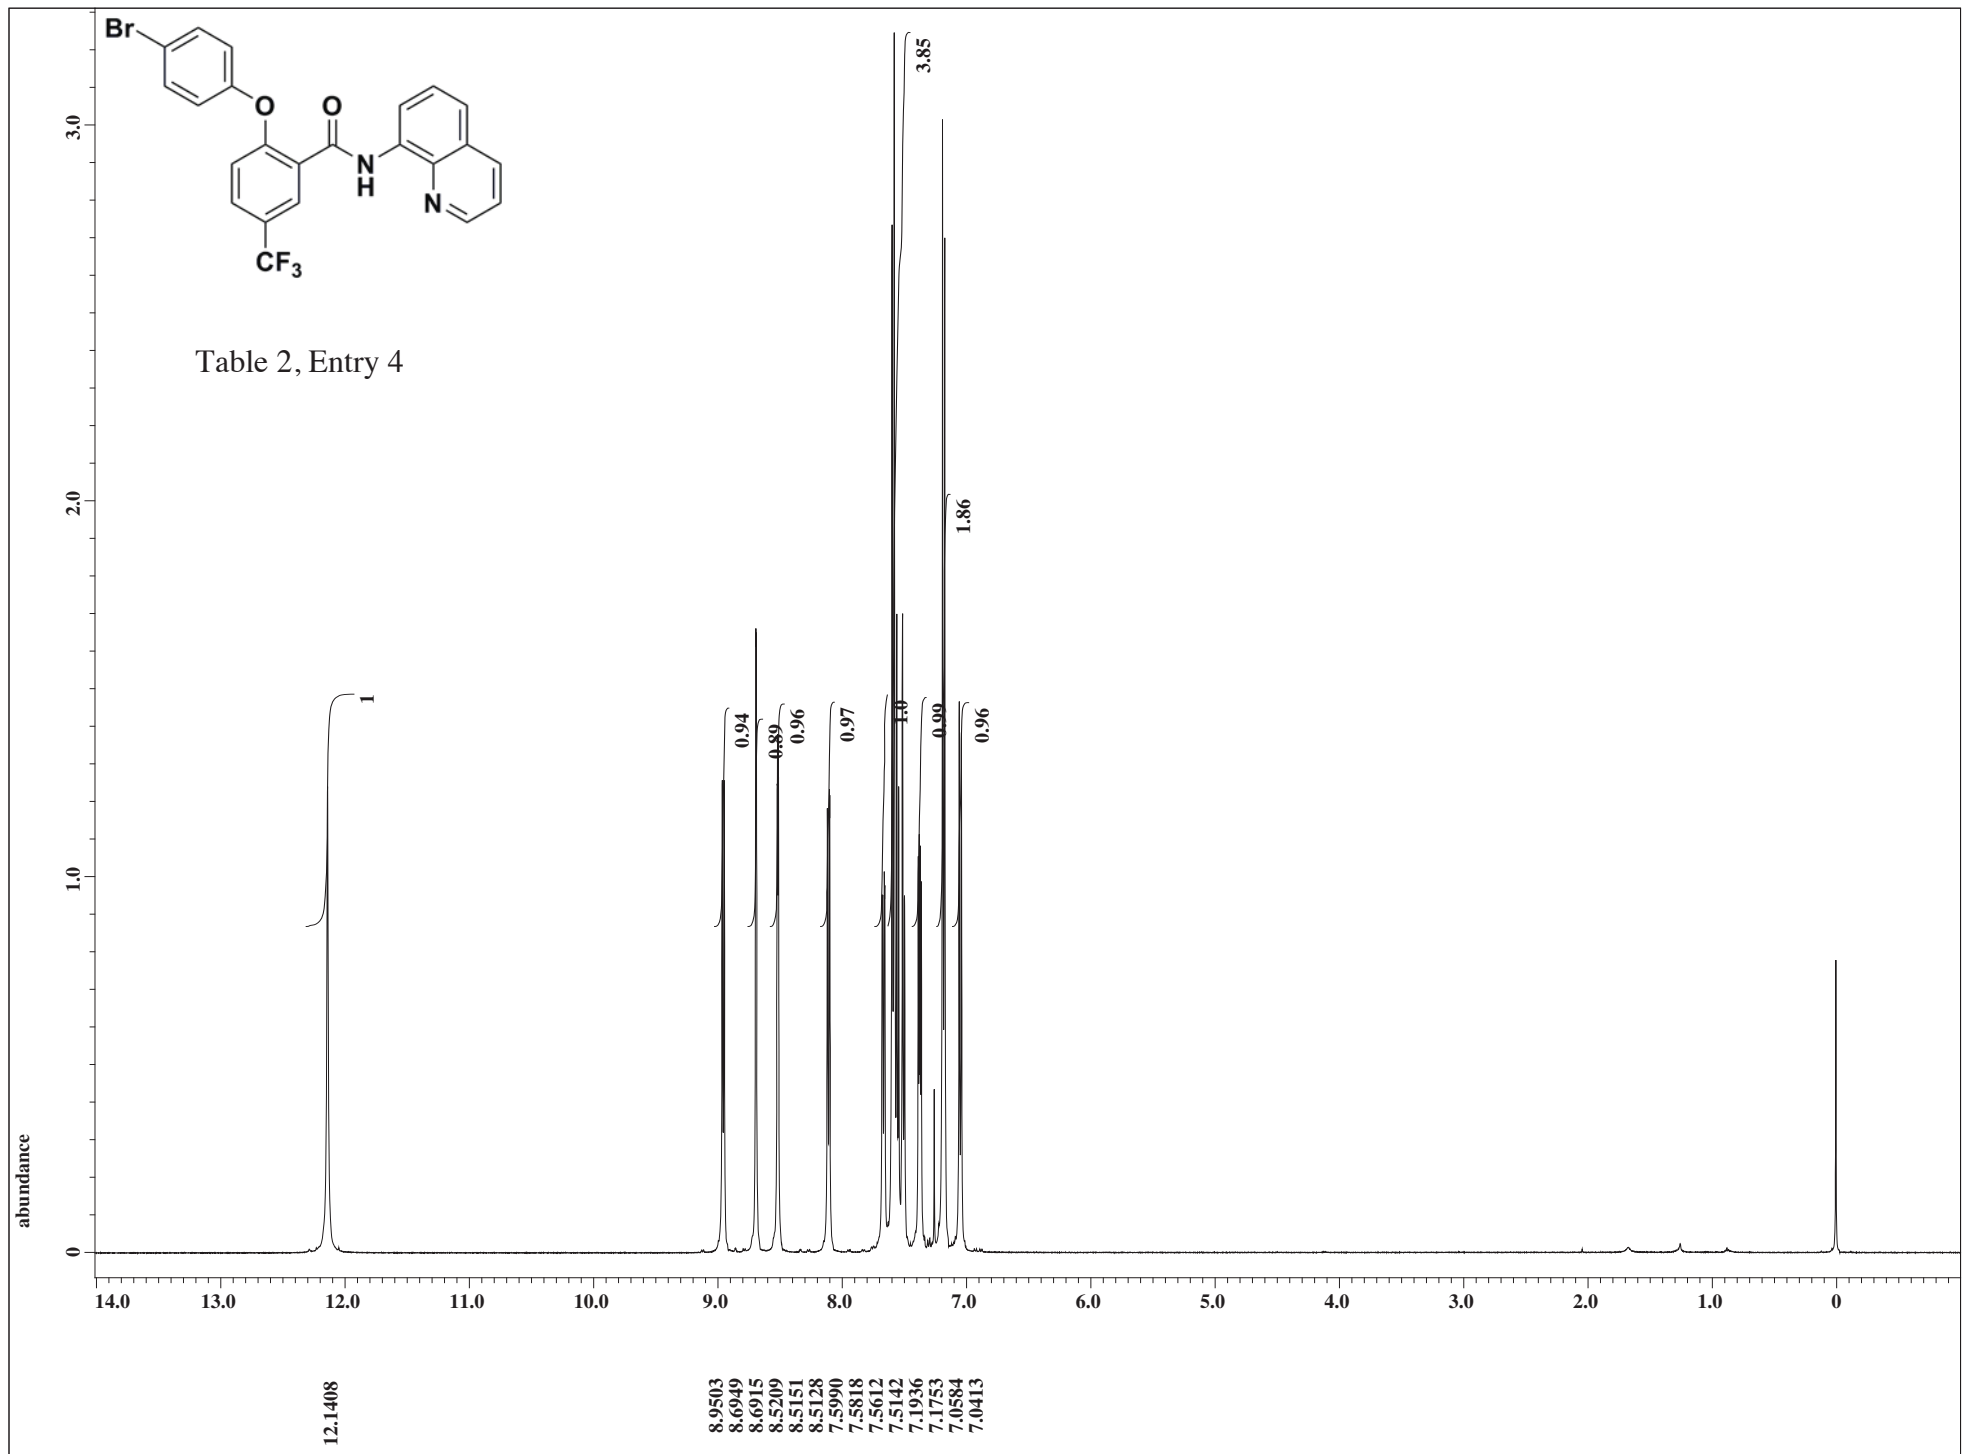

X : parts per Million : 1H

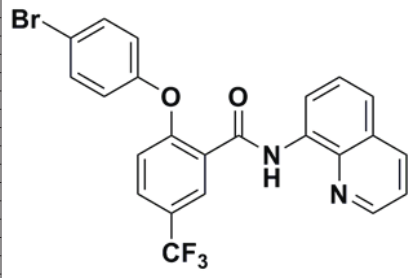

Table 2, Entry 4

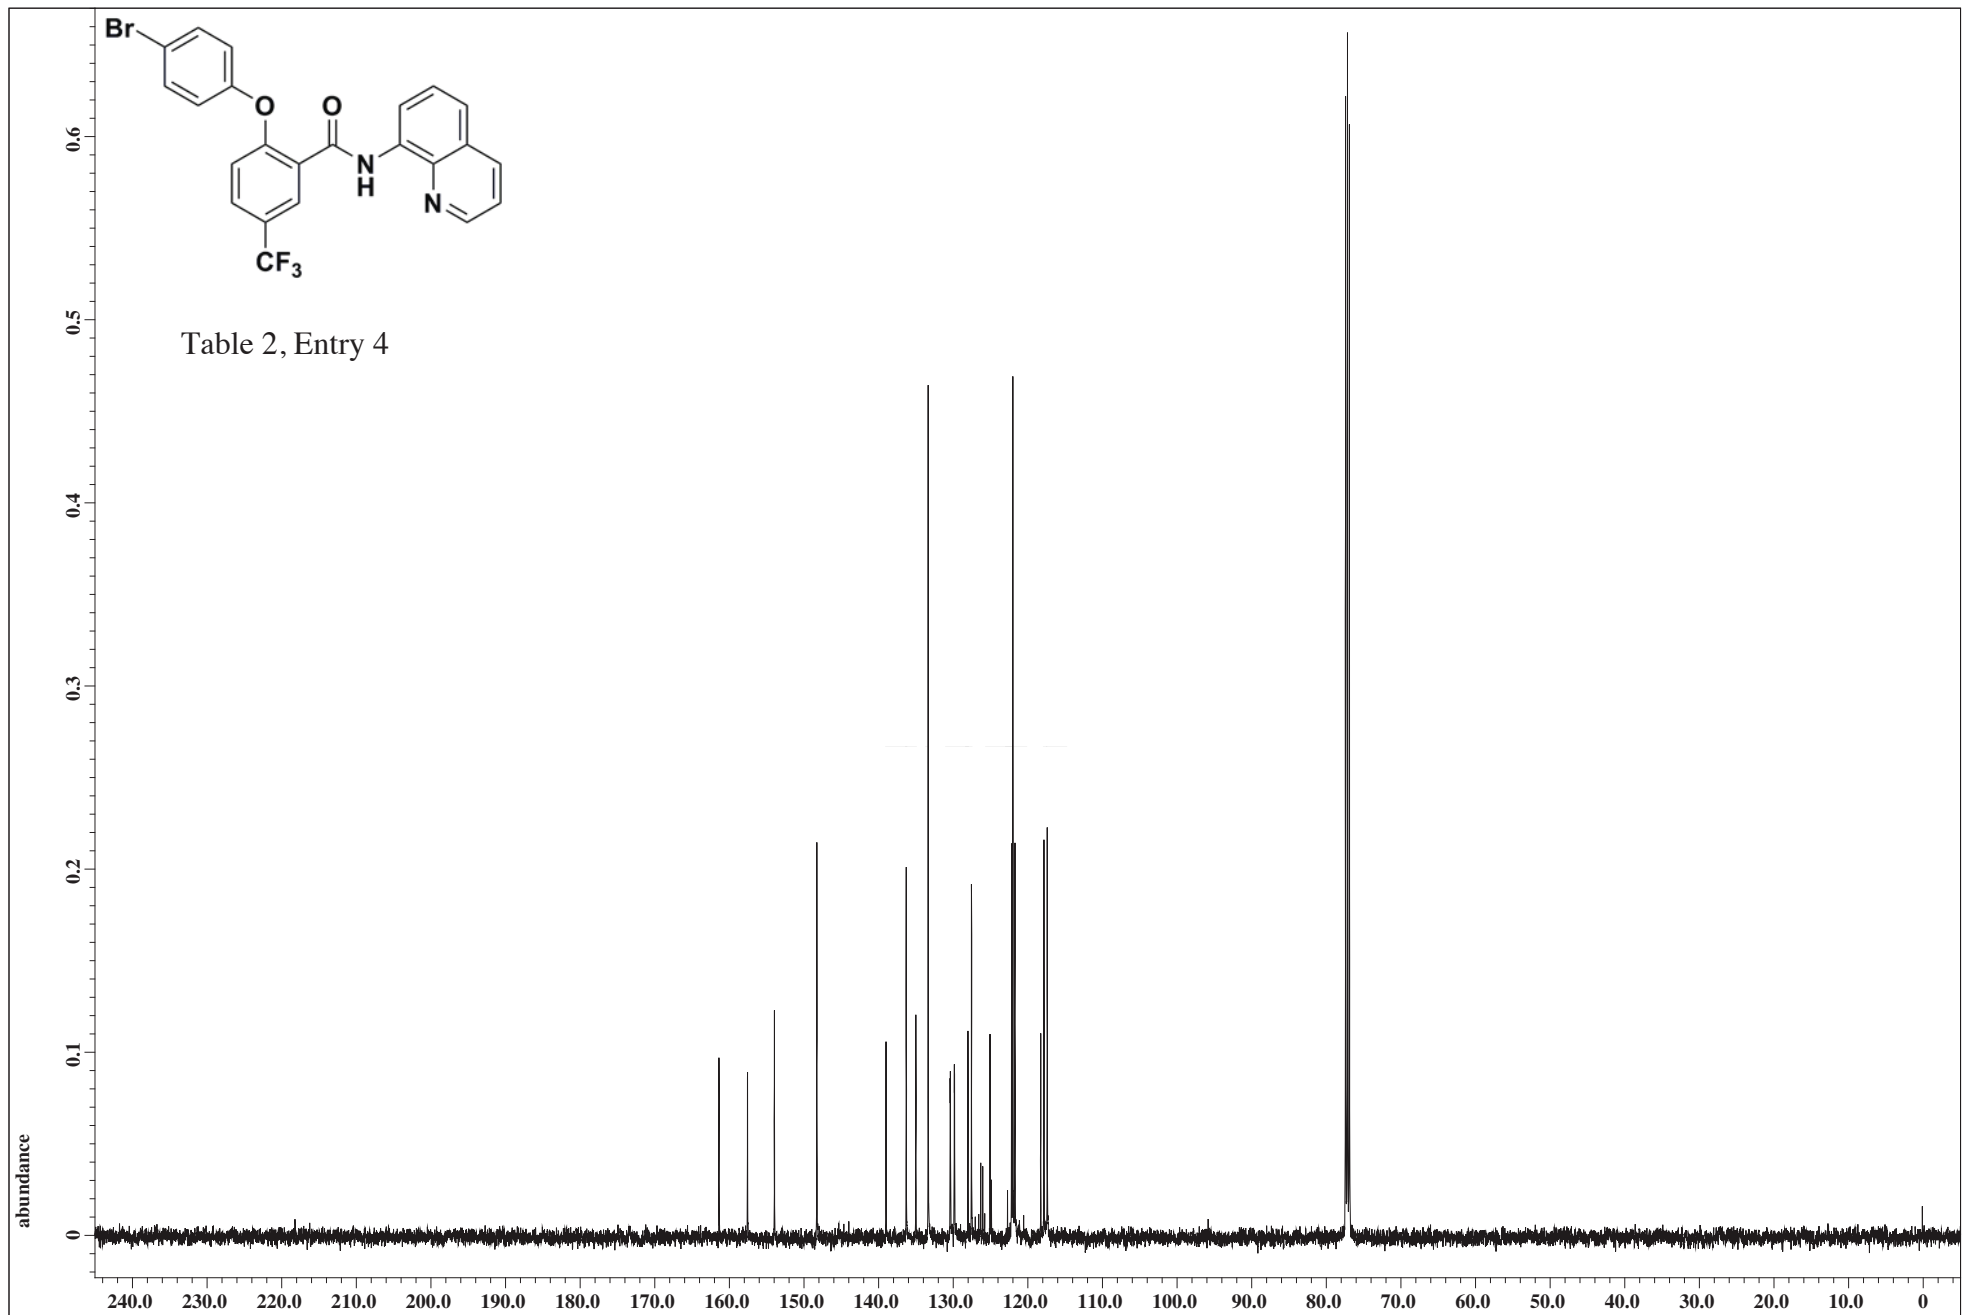

- 161.4025
- 157.5681
- 153.9626
- 148.2778
- 136.2976
- 135.0100
- 133.3598
- 128.0279
- 127.5605
- 122.1809
- 122.0092
- 121.7231
- 117.8410
- 117.4022

X : parts per Million : 13C

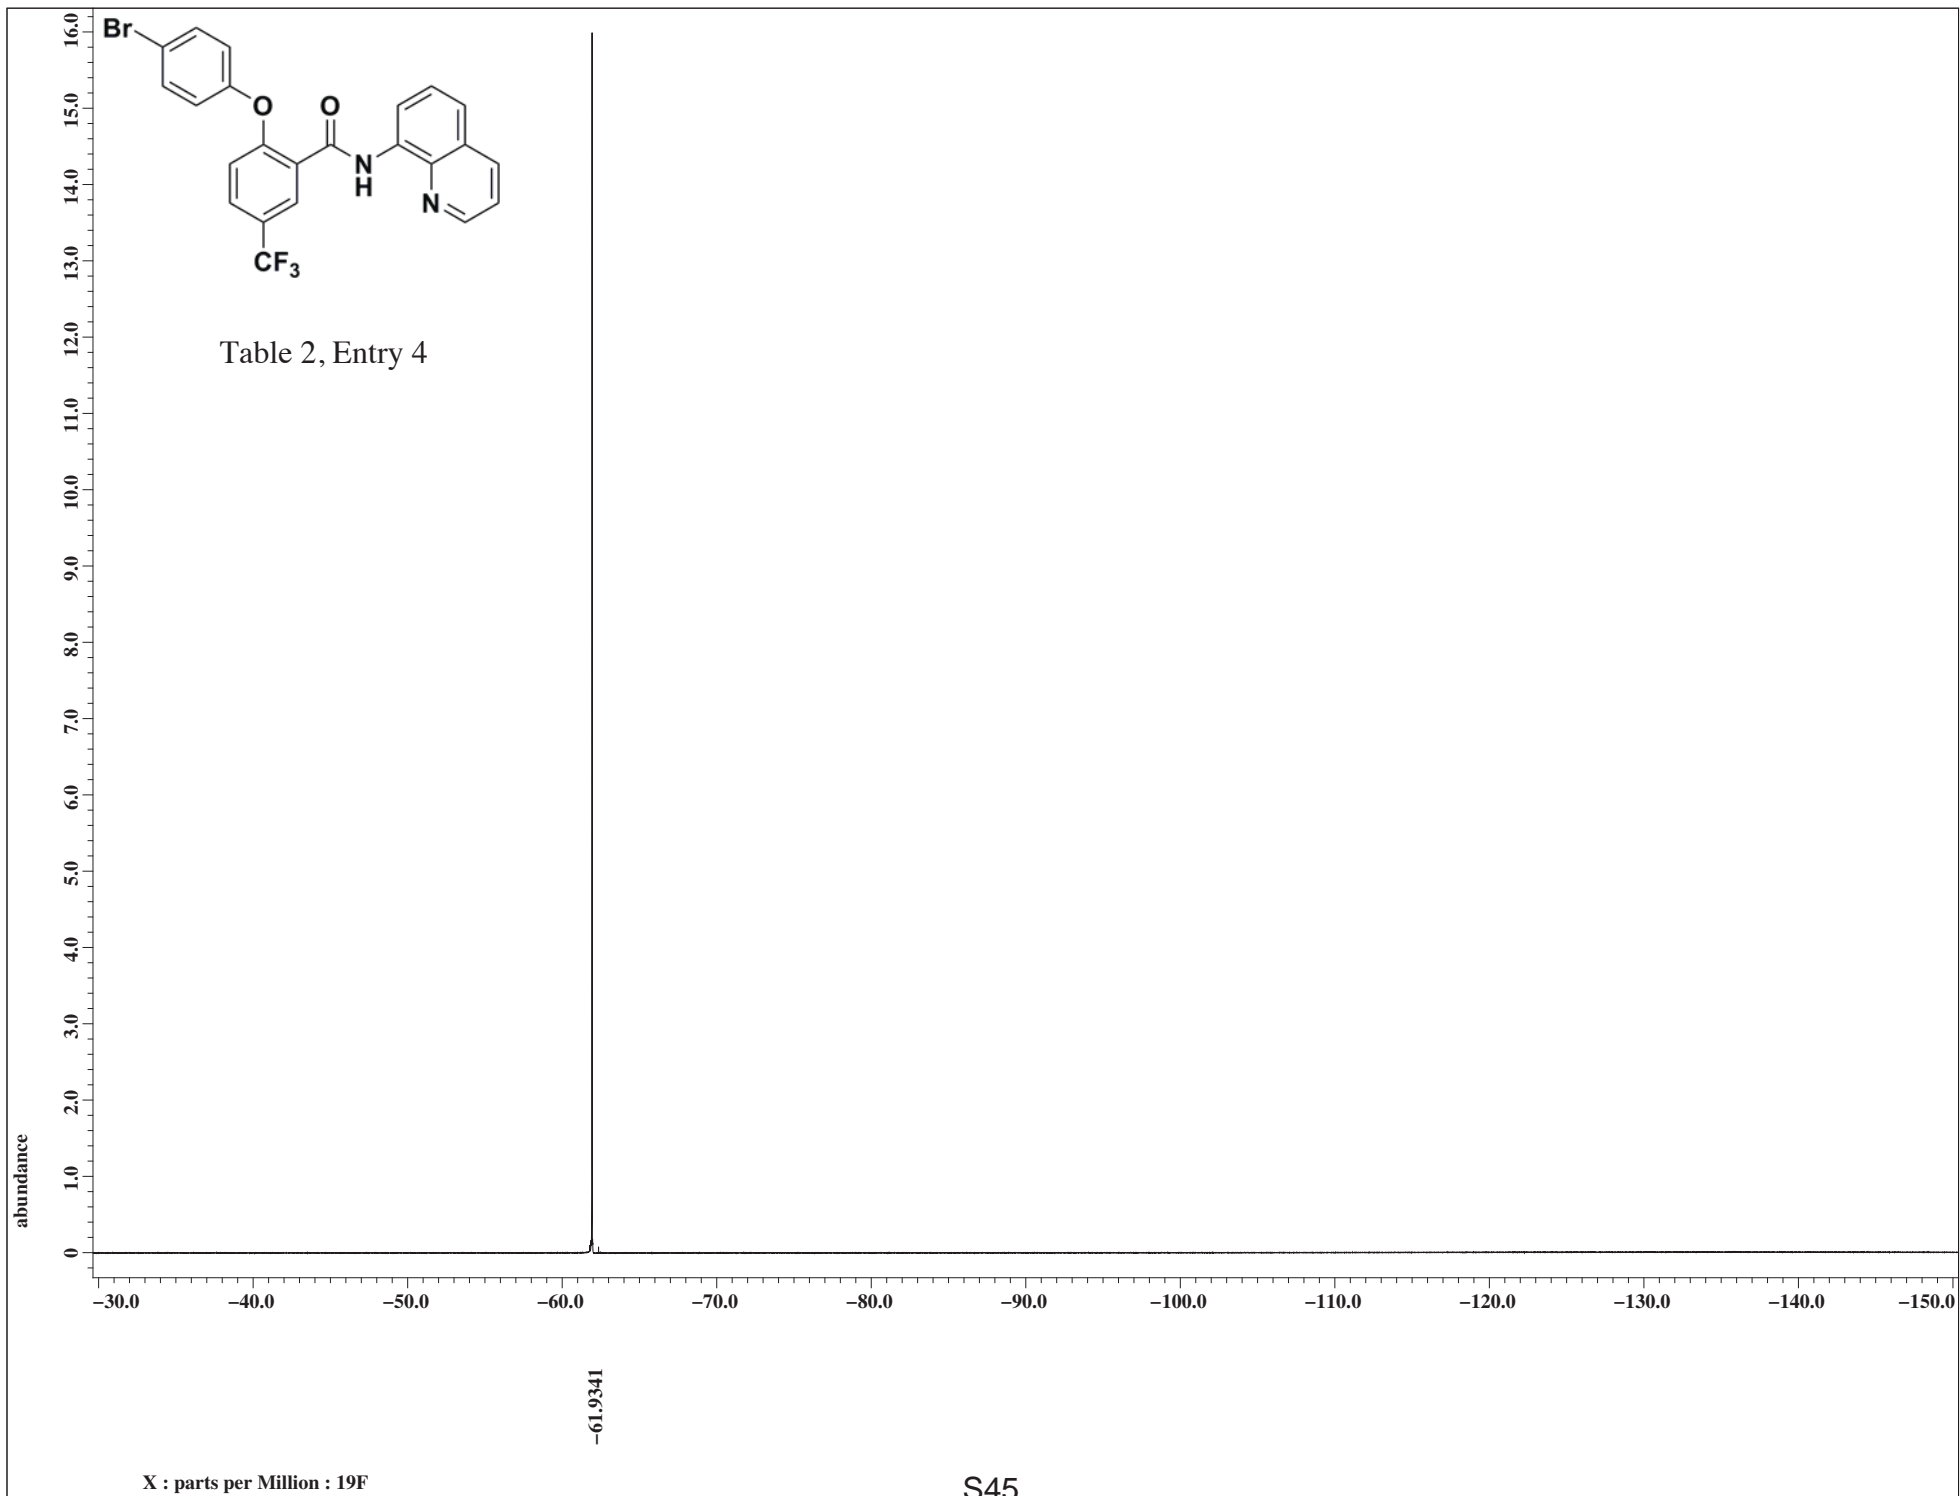

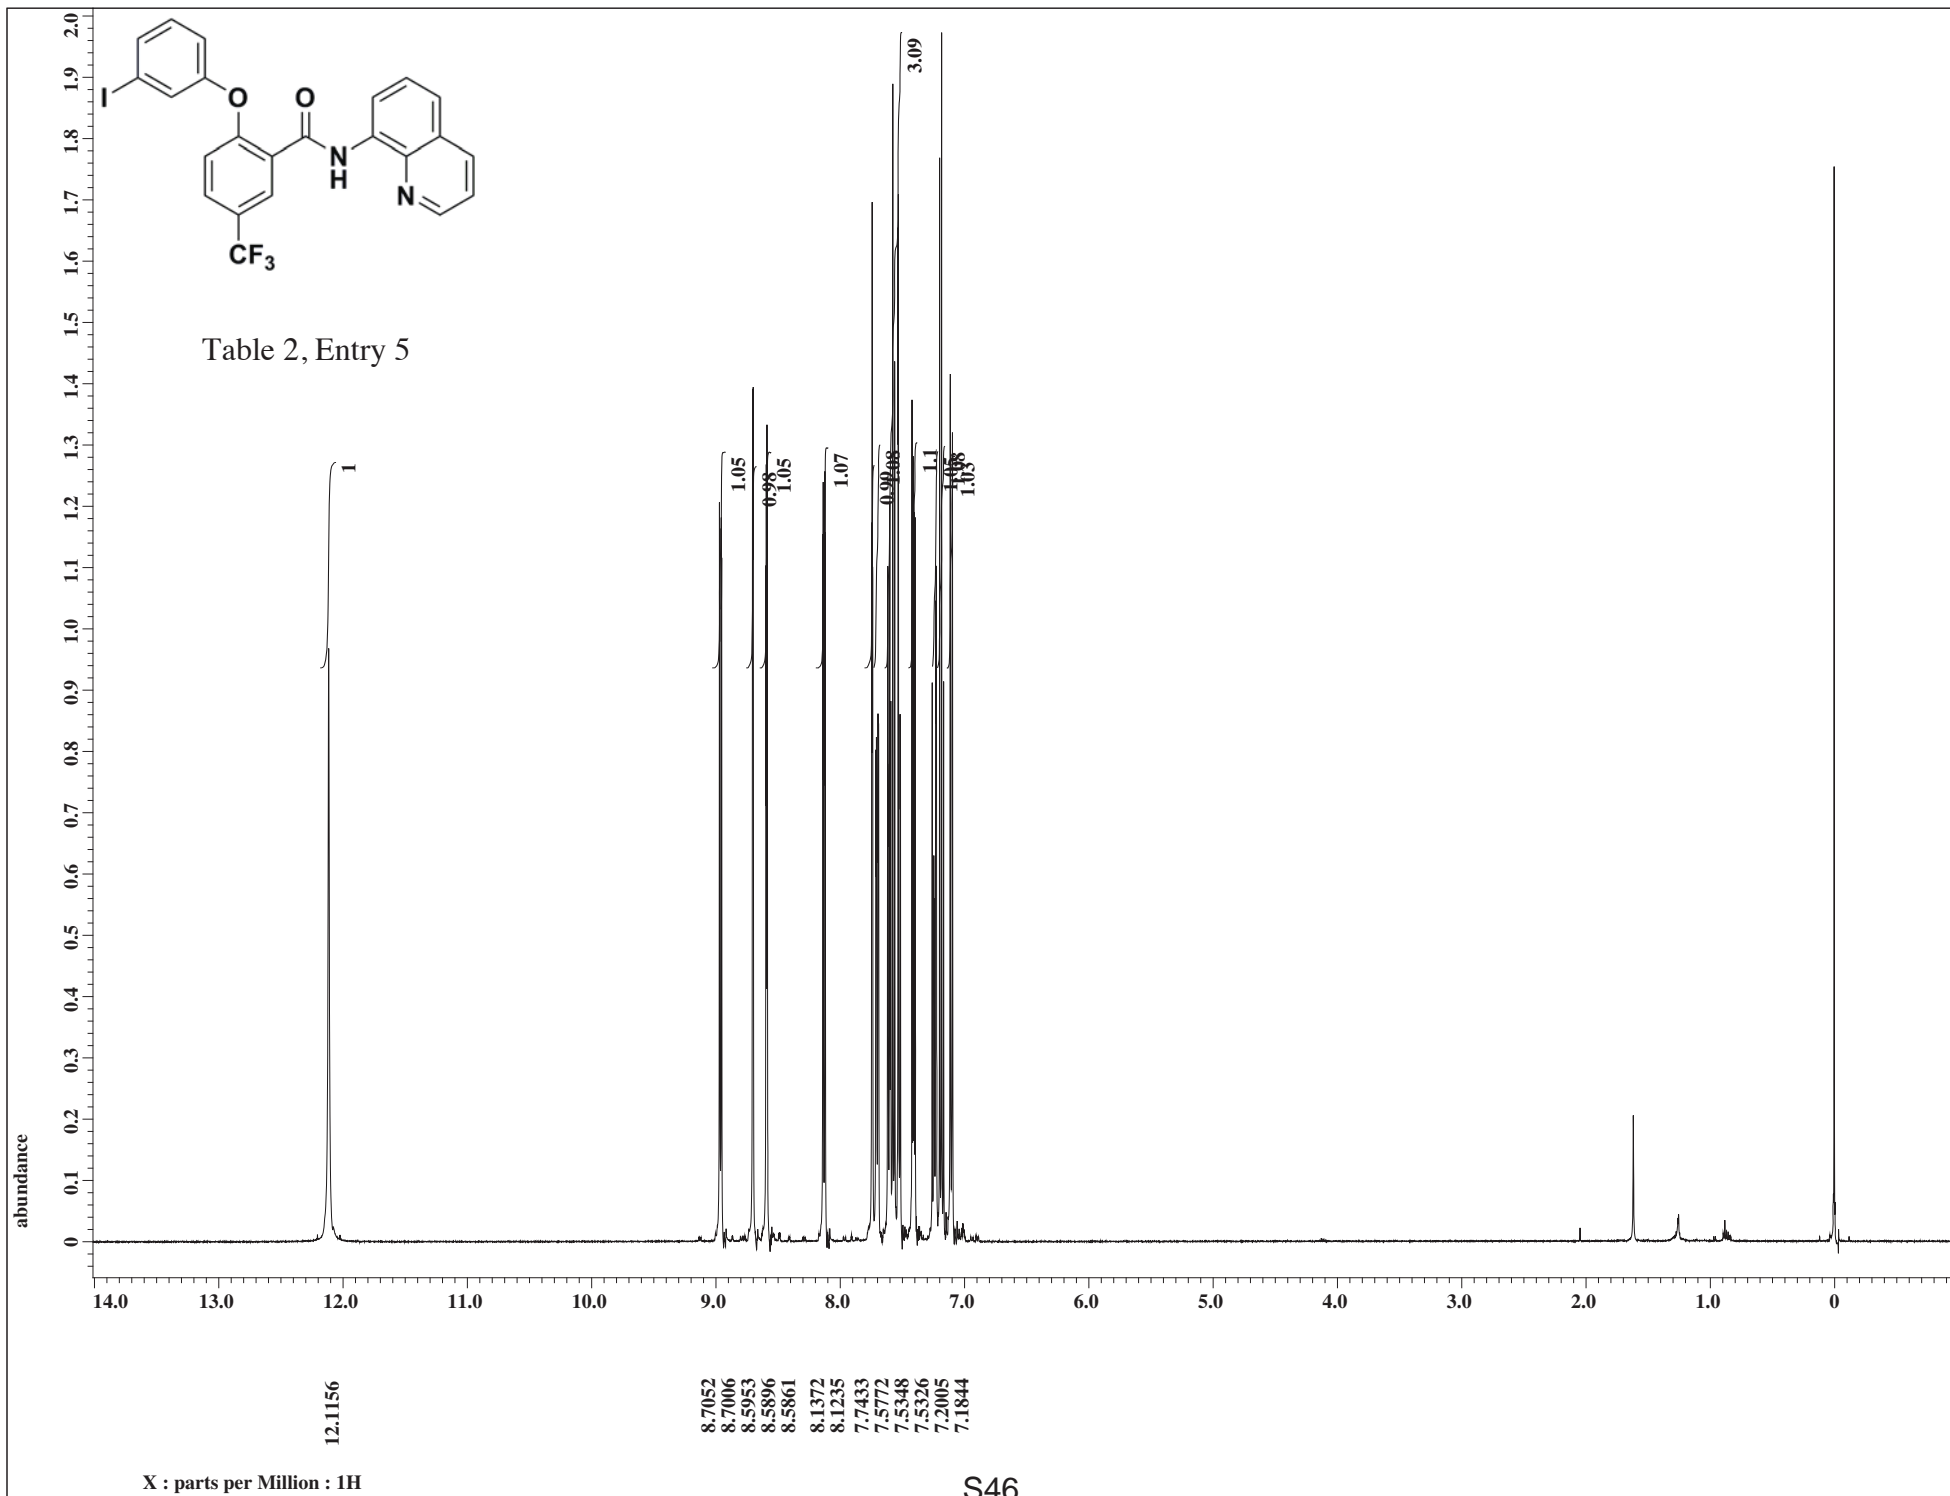

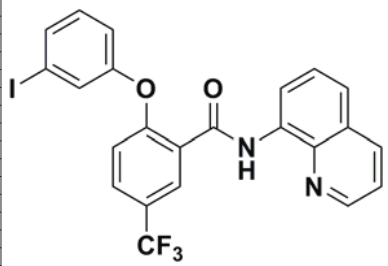

Table 2, Entry 5

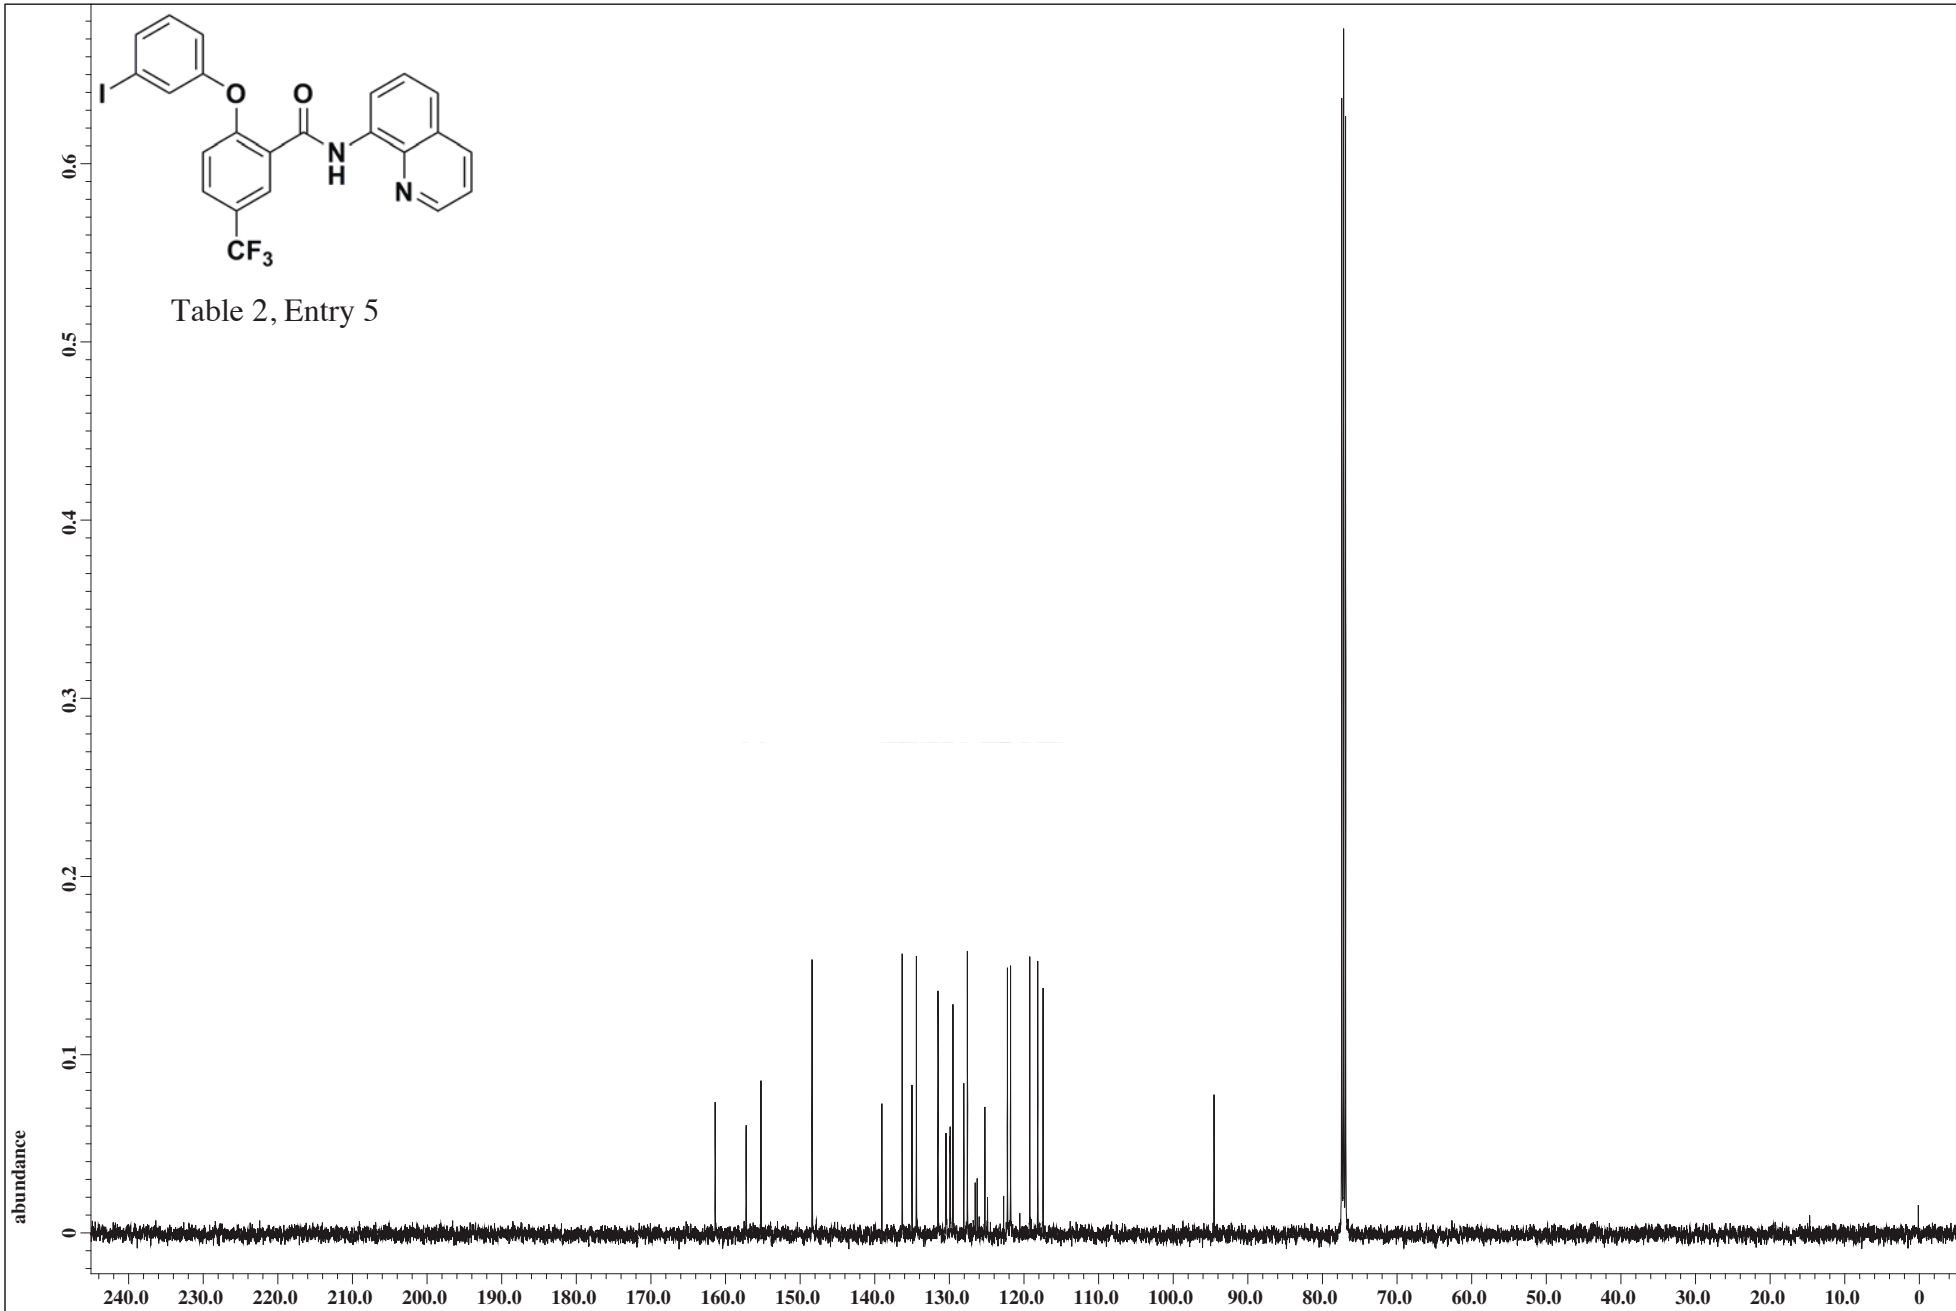

- 161.3931
- 157.2344
- 155.2504
- 148.4019
- 136.3264
- 134.4187
- 131.5286
- 129.5256
- 127.5893
- 122.2192
- 121.7995
- 119.2242
- 118.1559
- 117.4405
- 94.5294

X : parts per Million : 13C

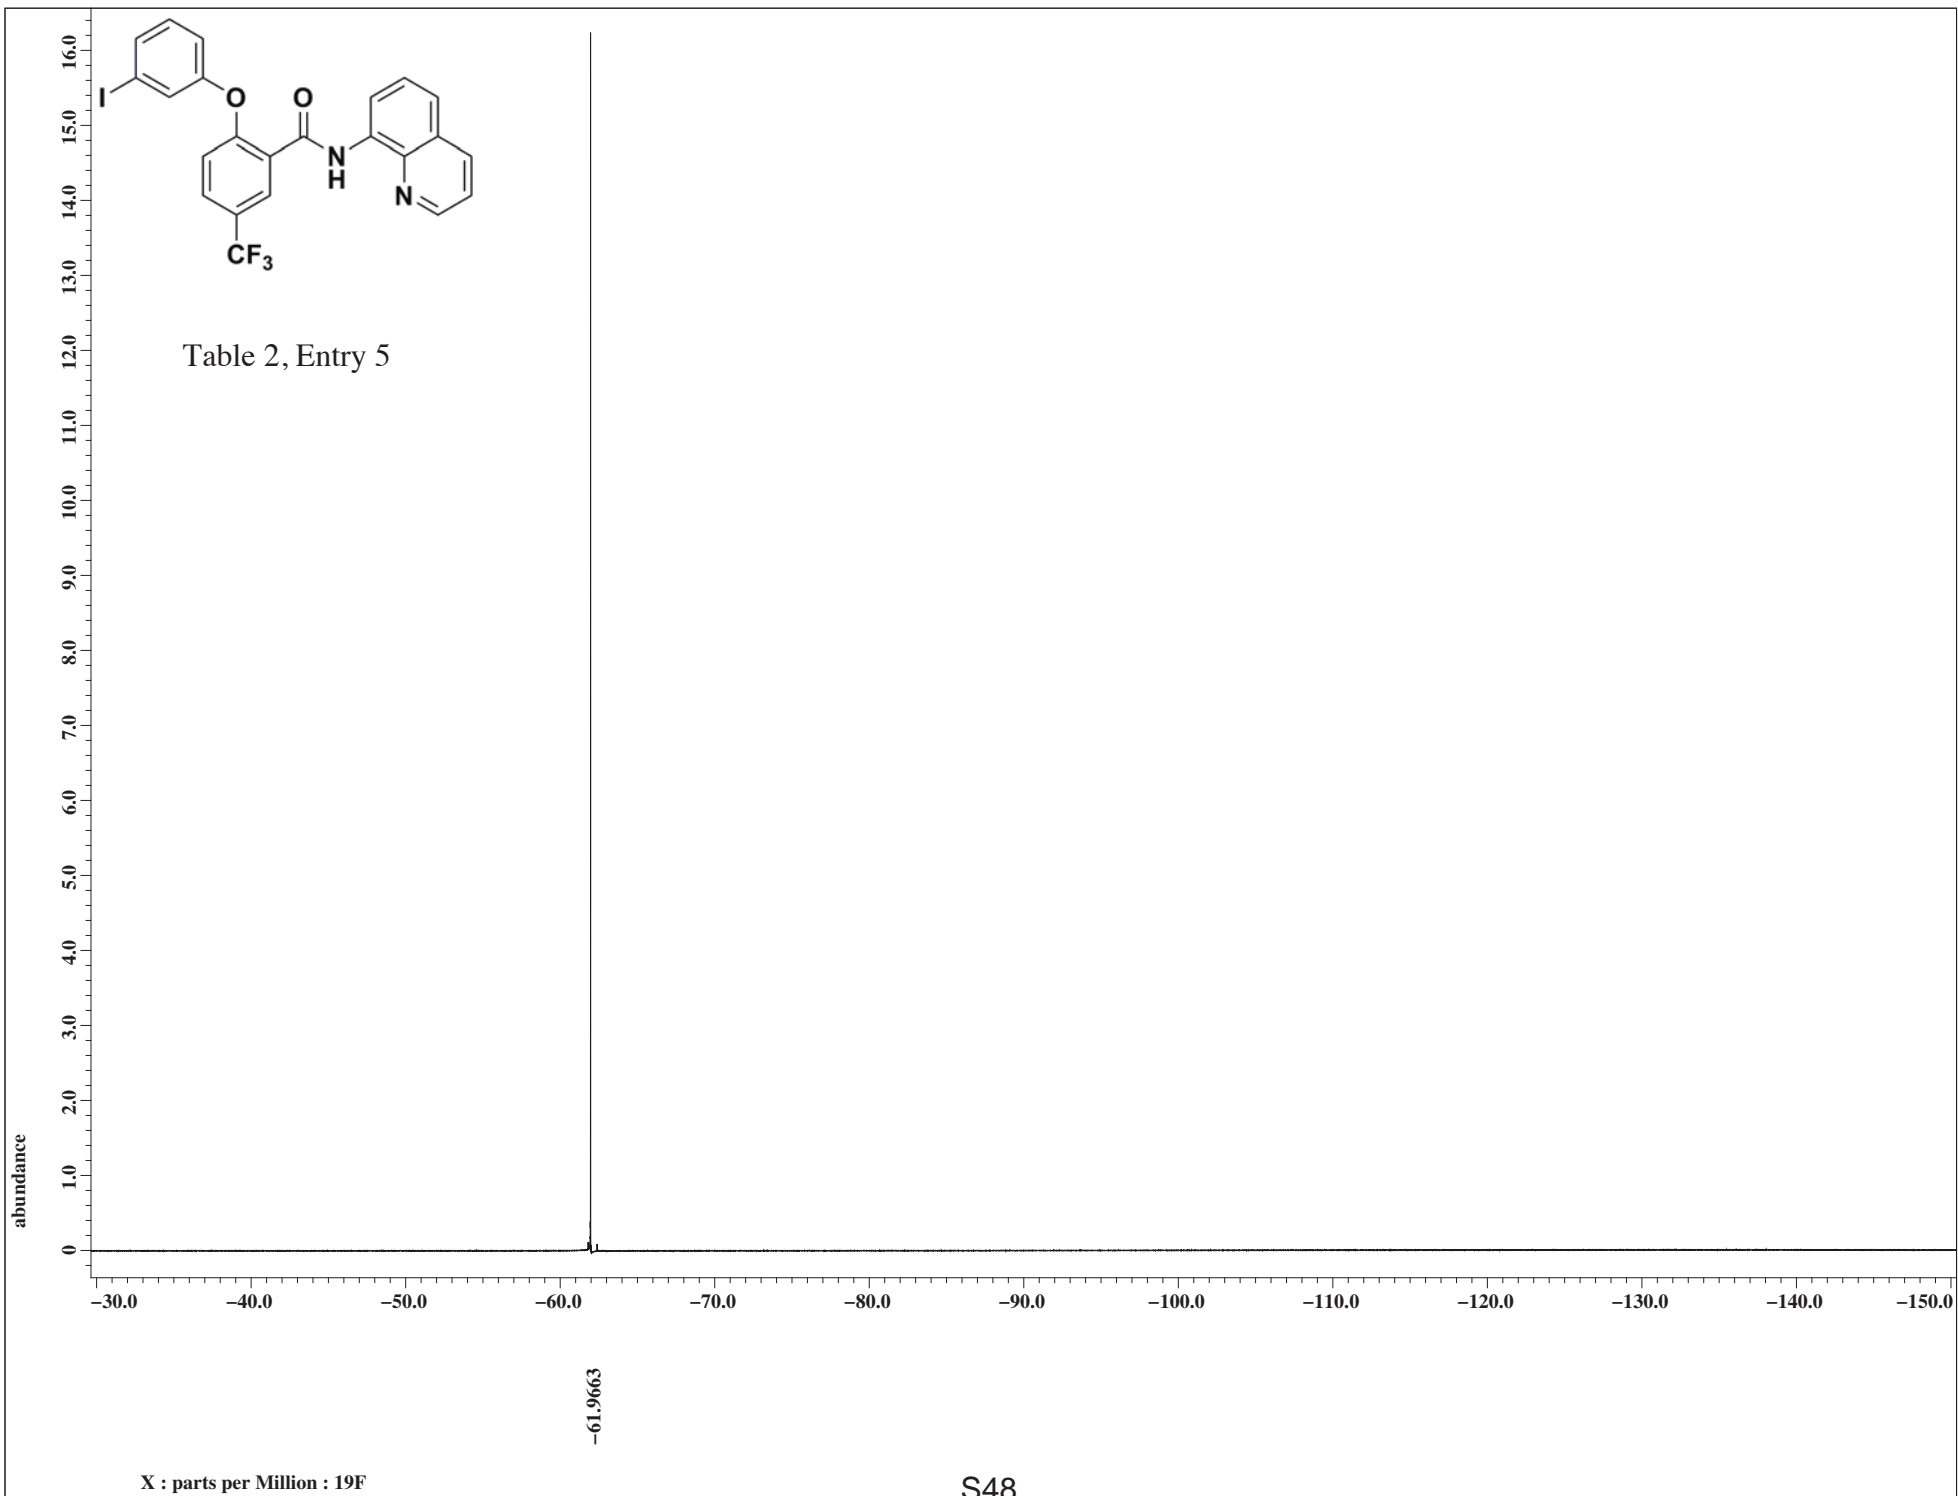



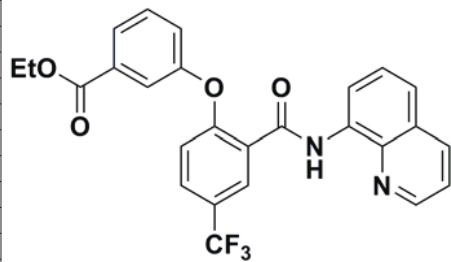

Table 2, Entry 6

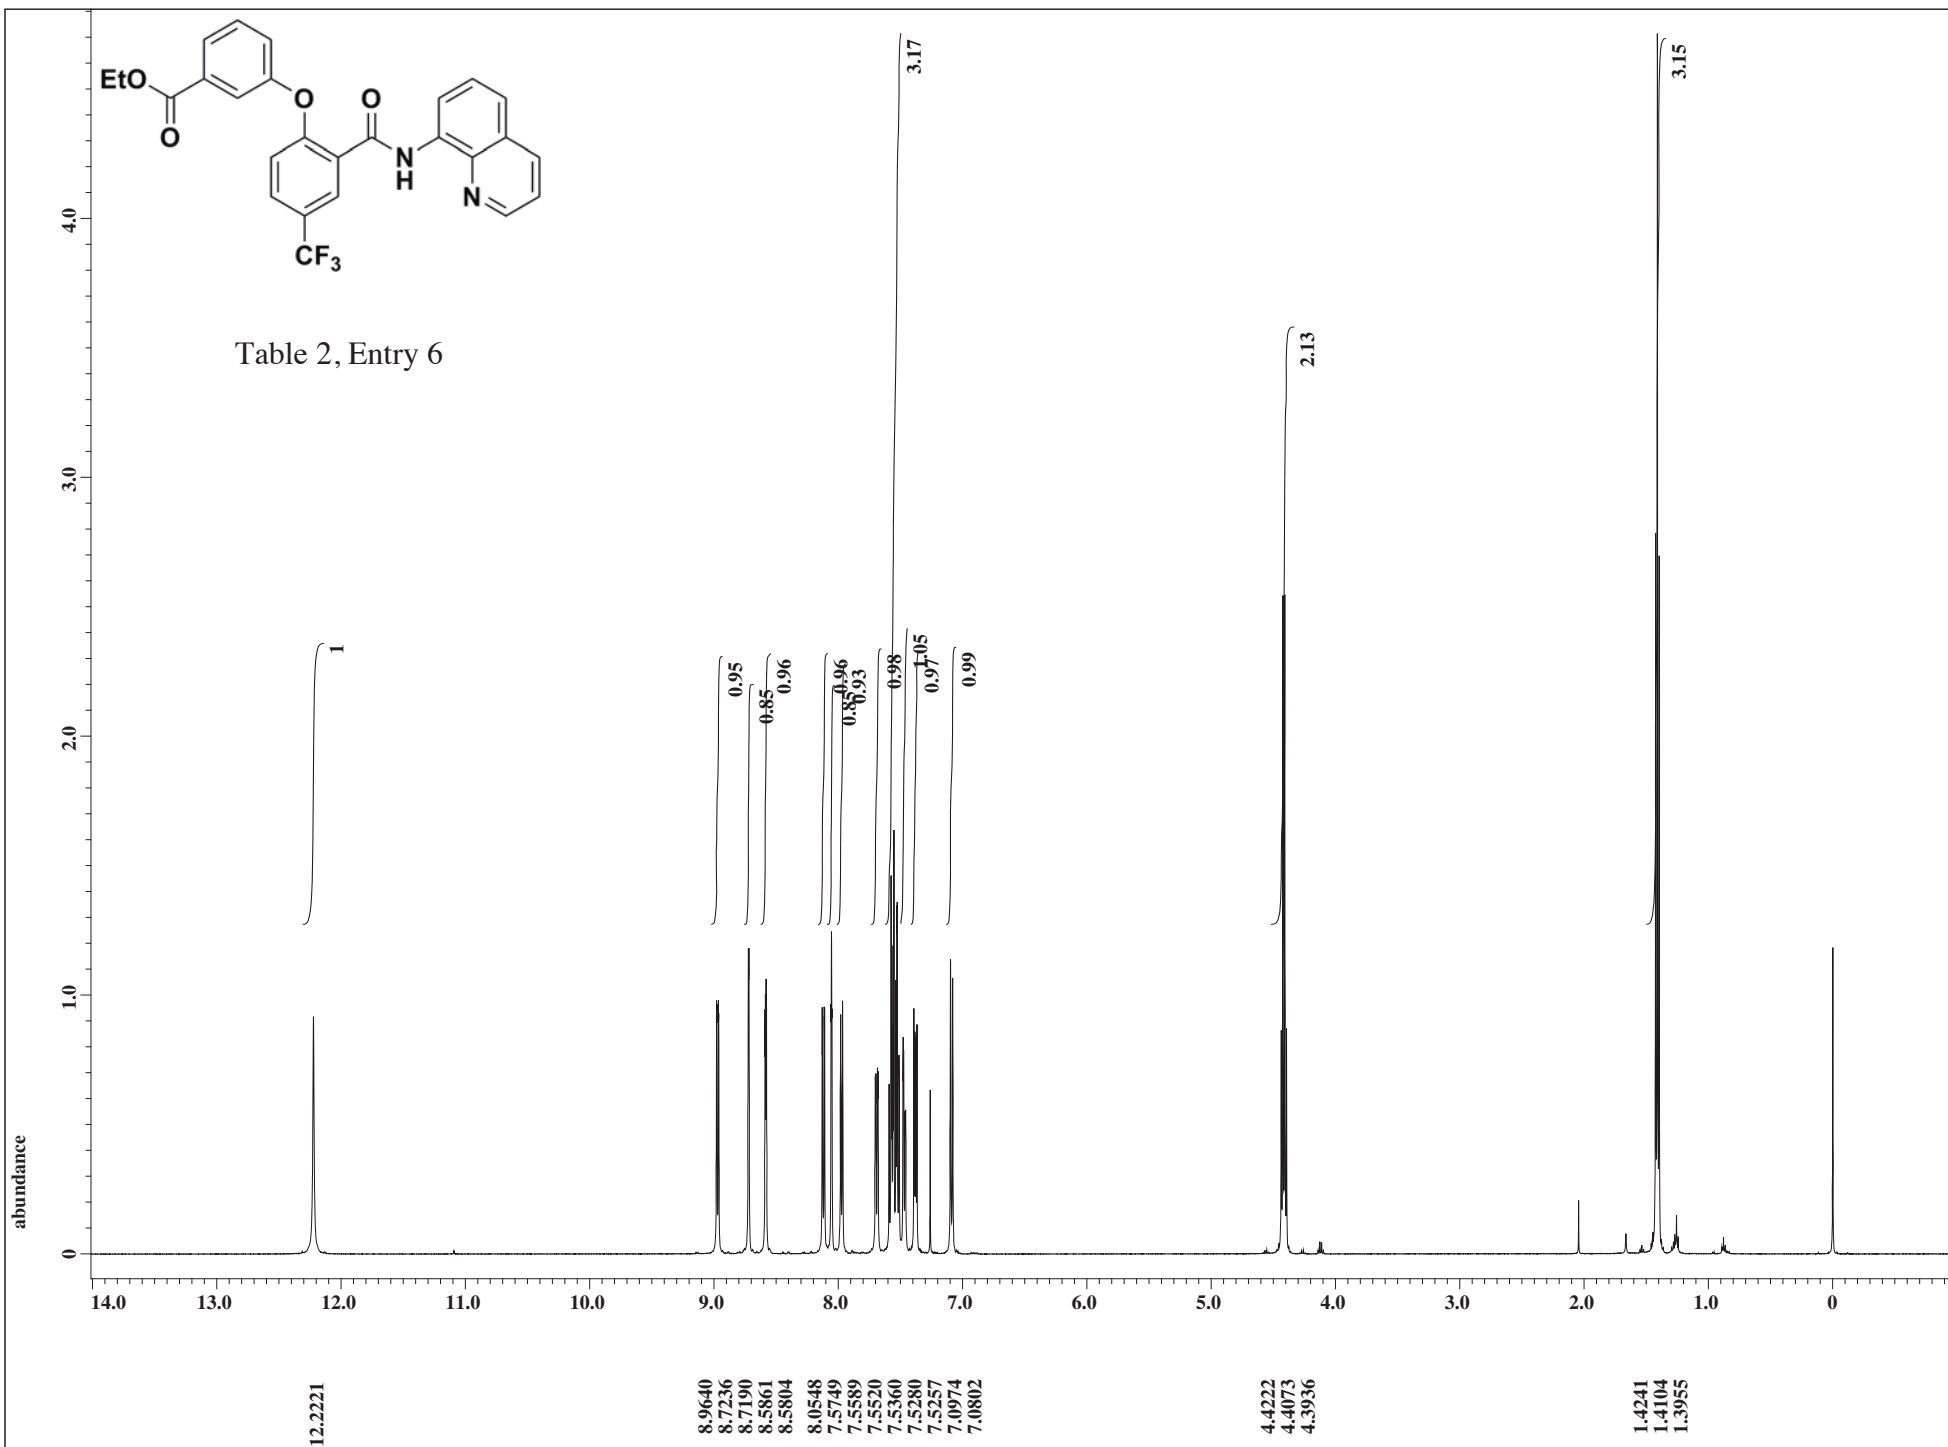

X : parts per Million : 1H

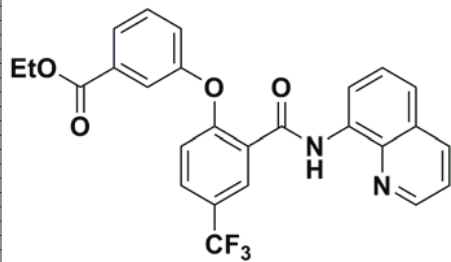

Table 2, Entry 6

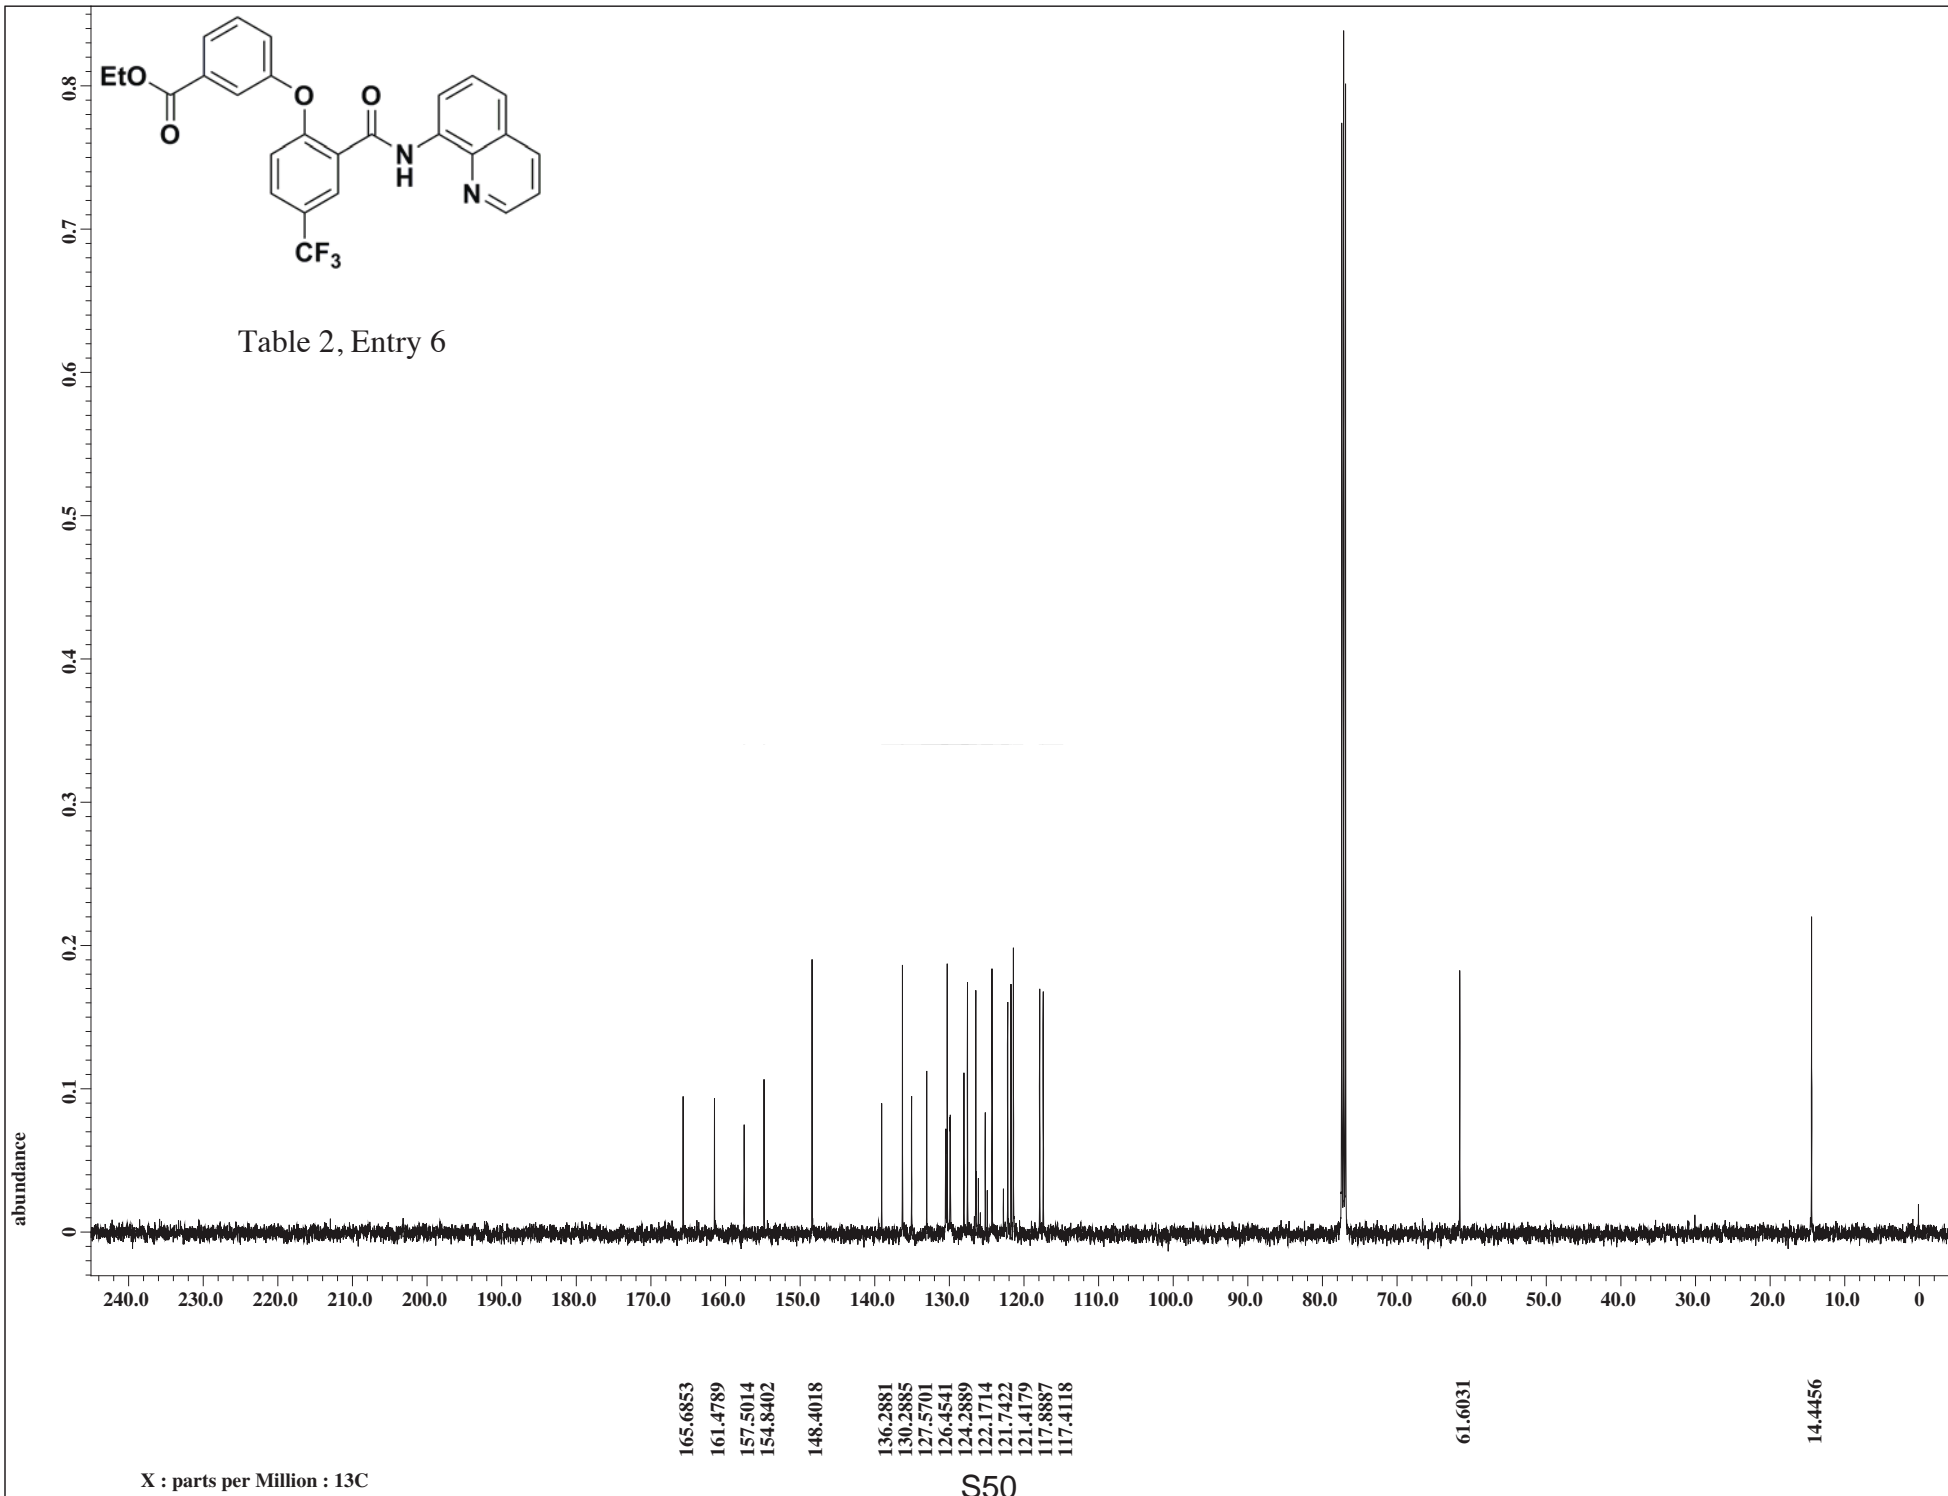

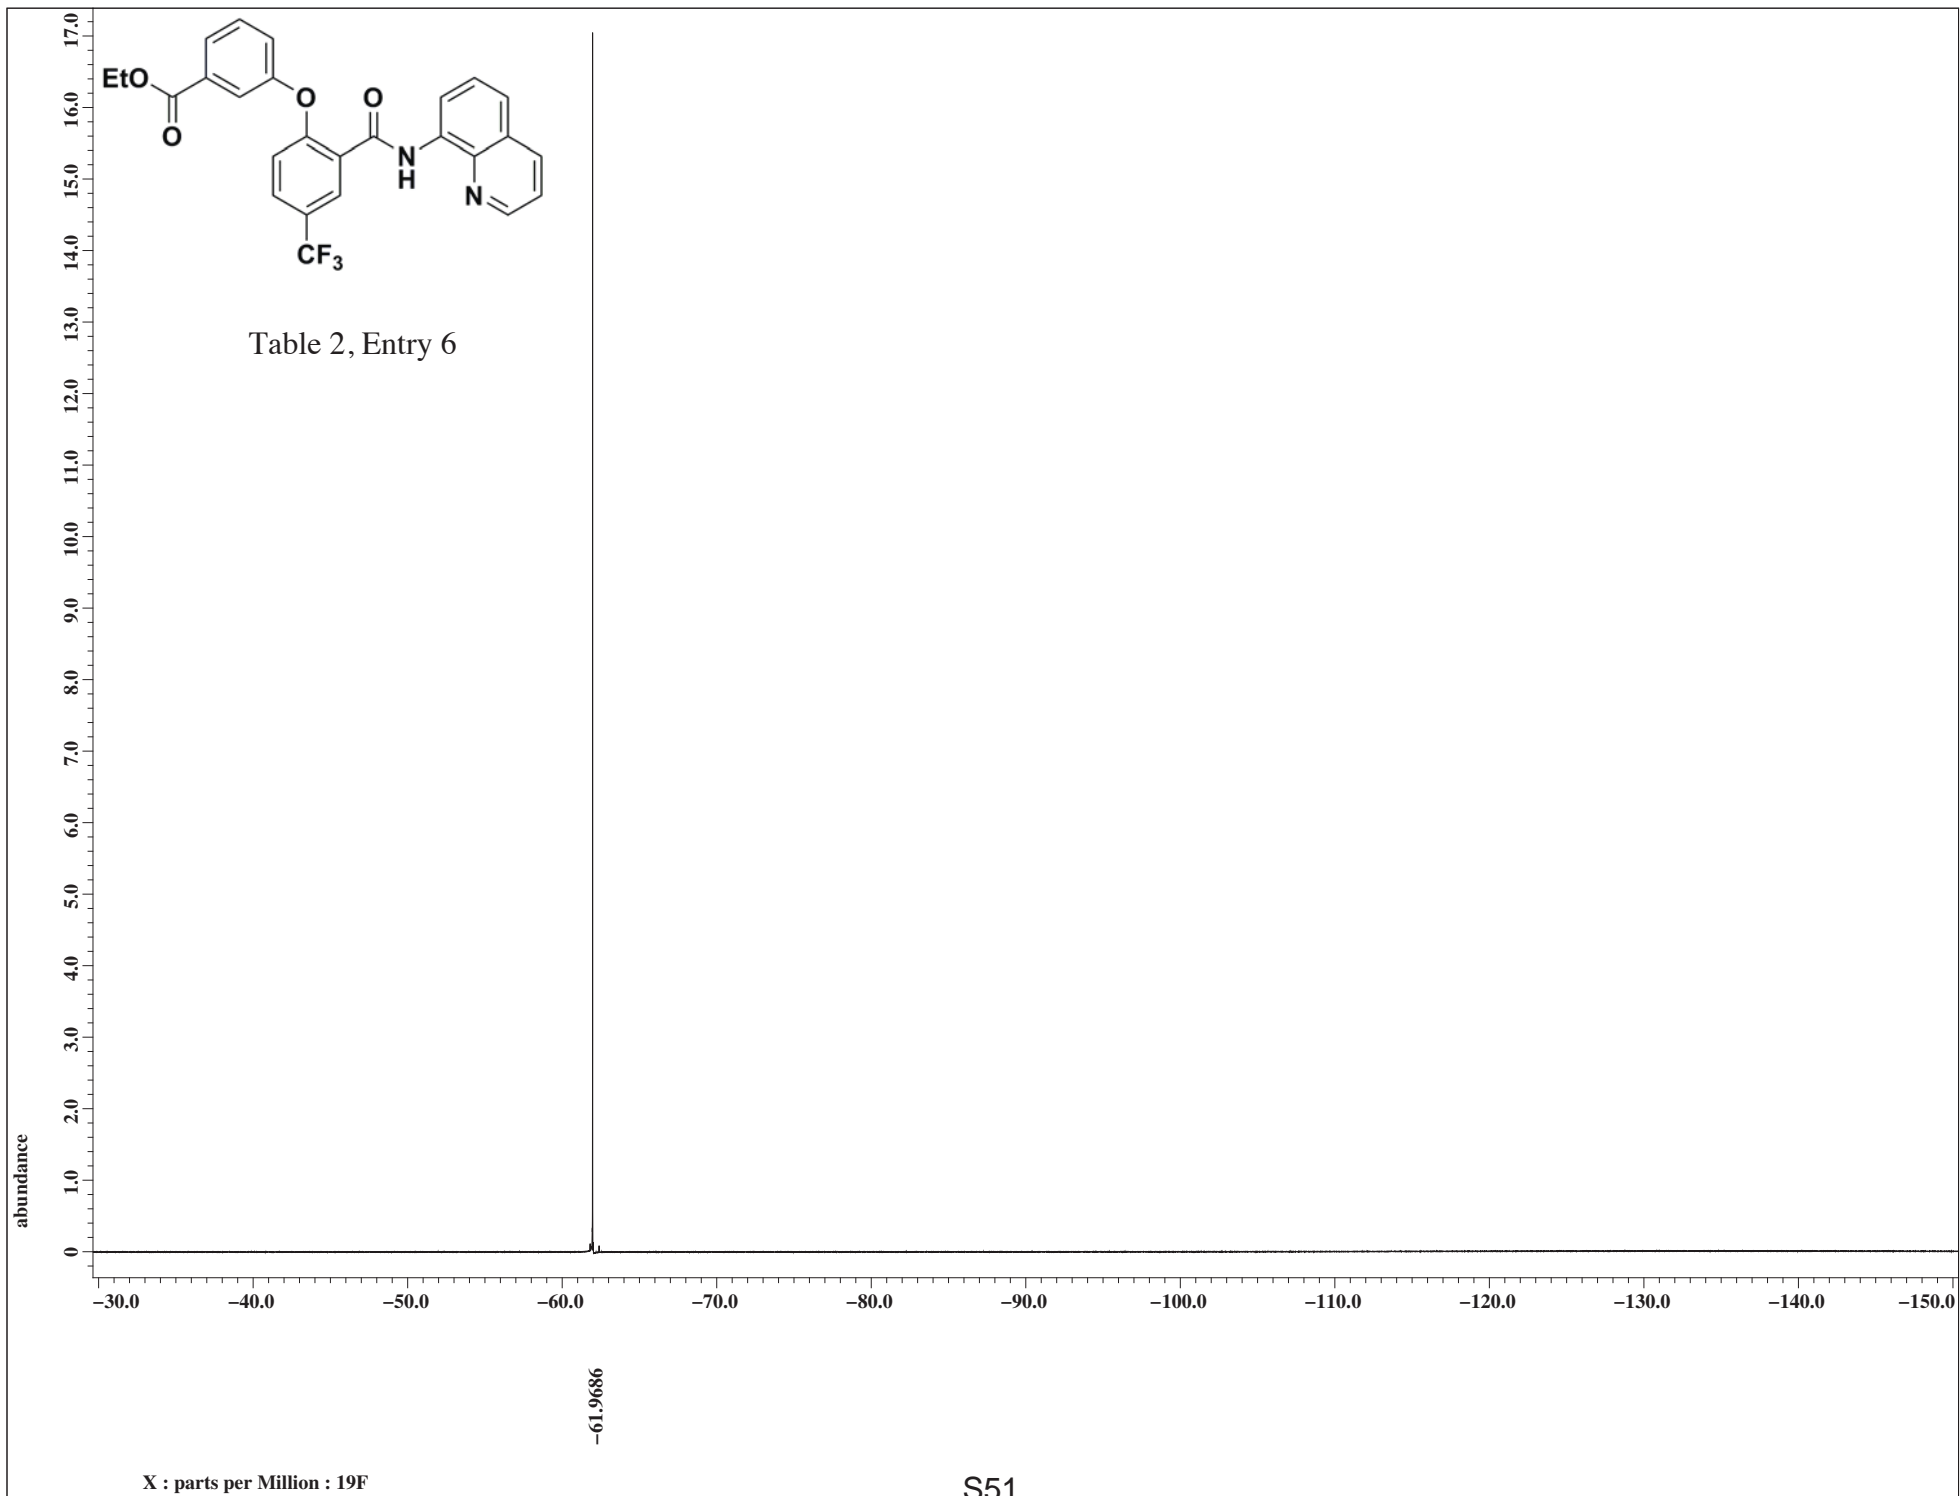

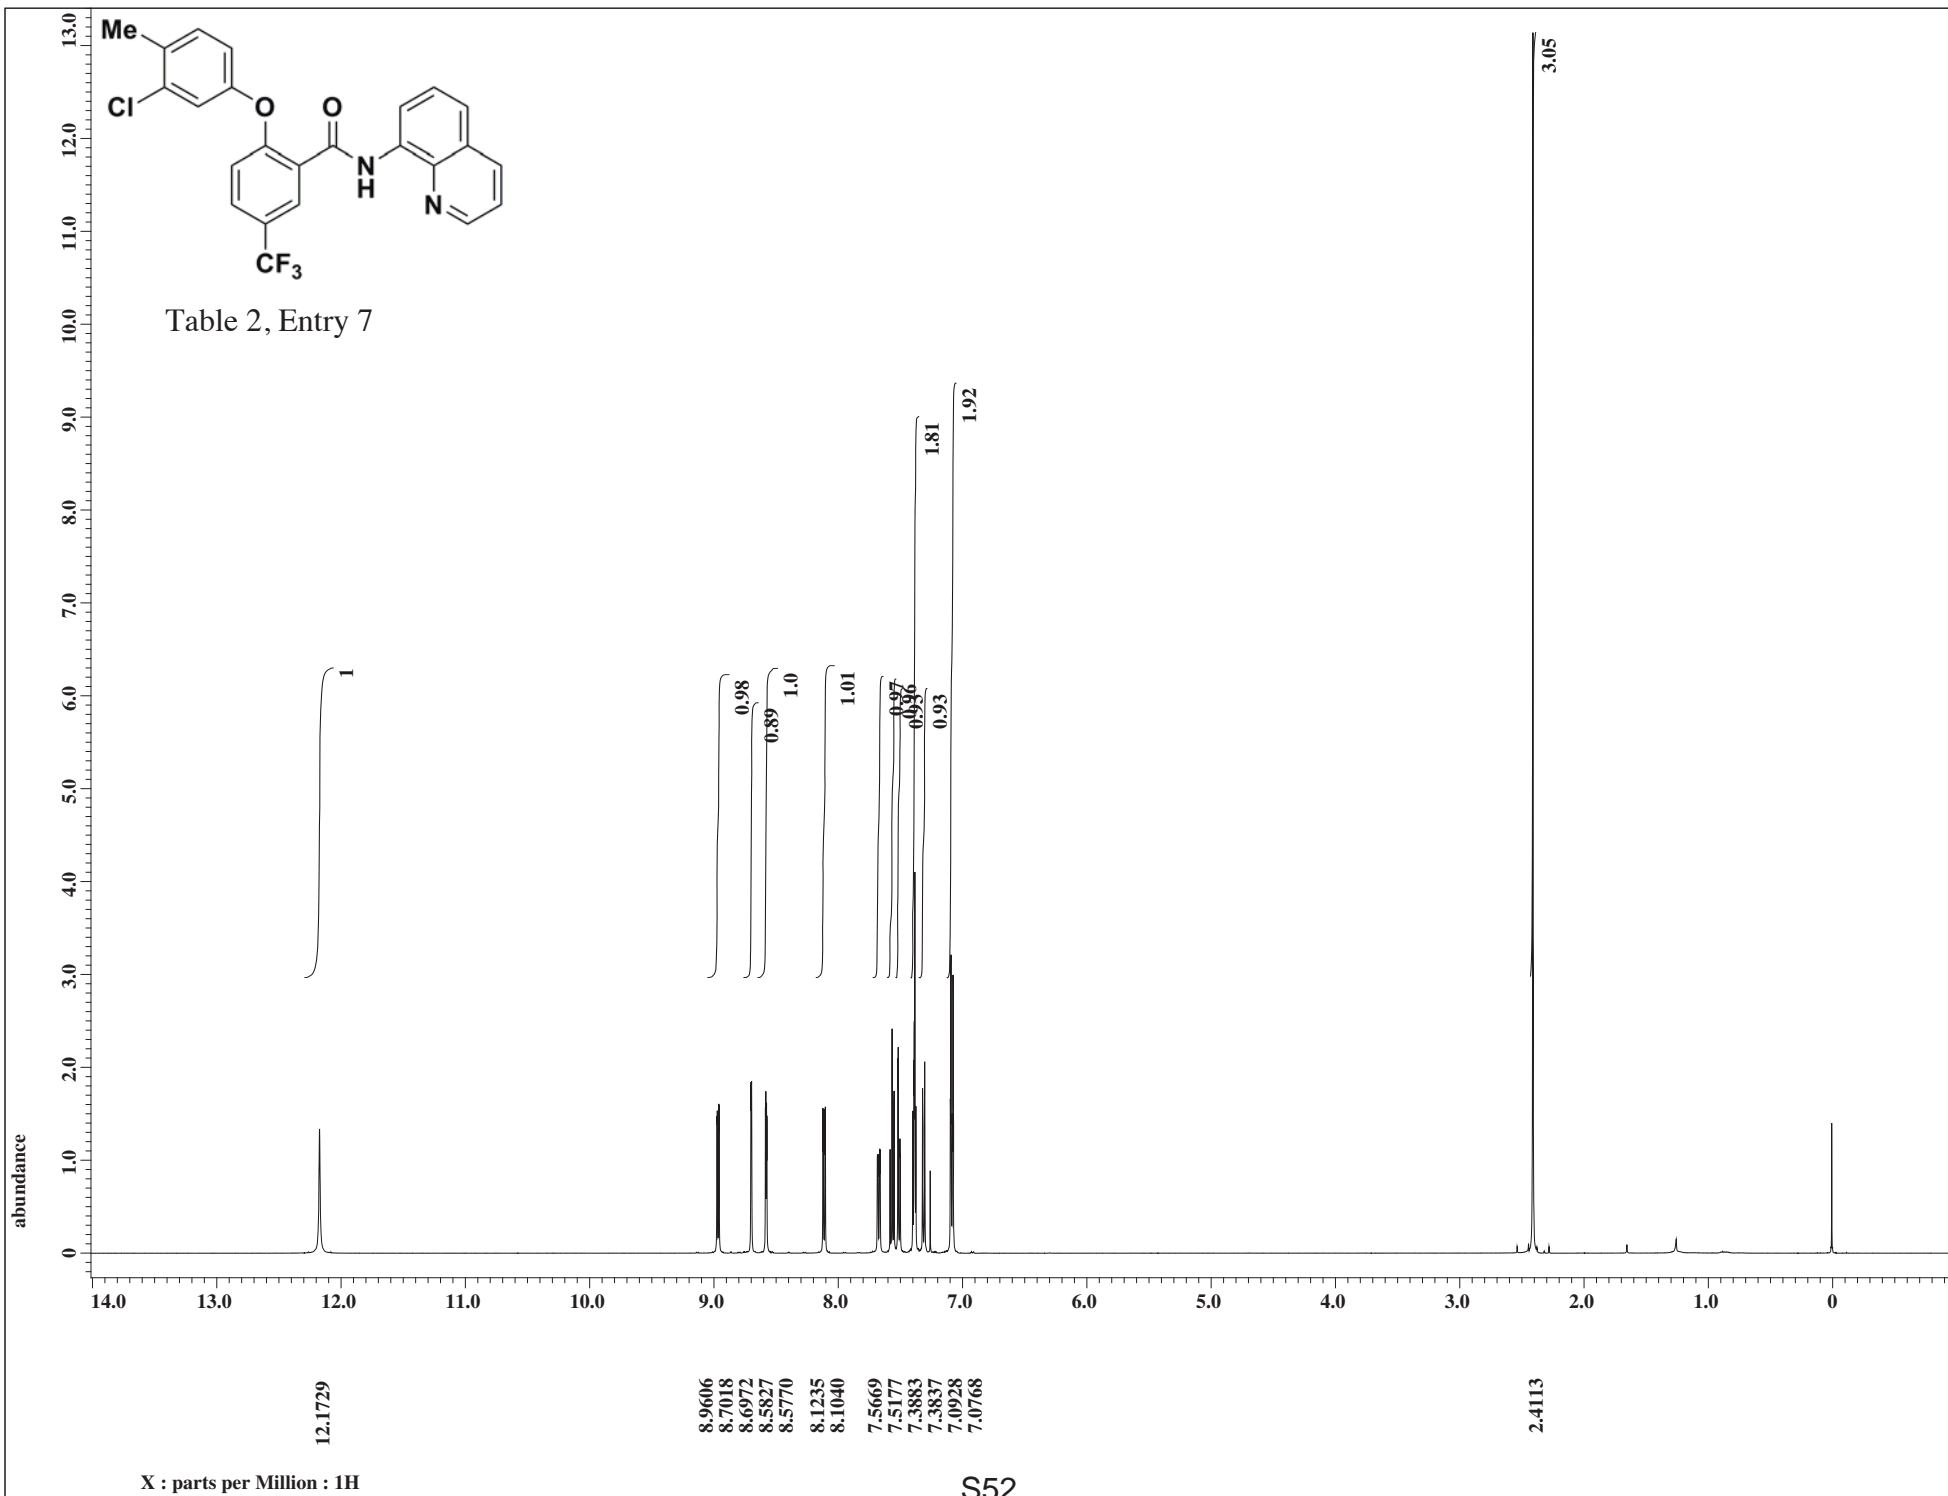

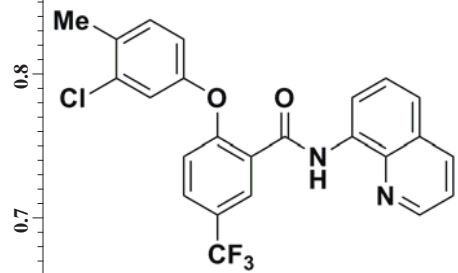

Table 2, Entry 7

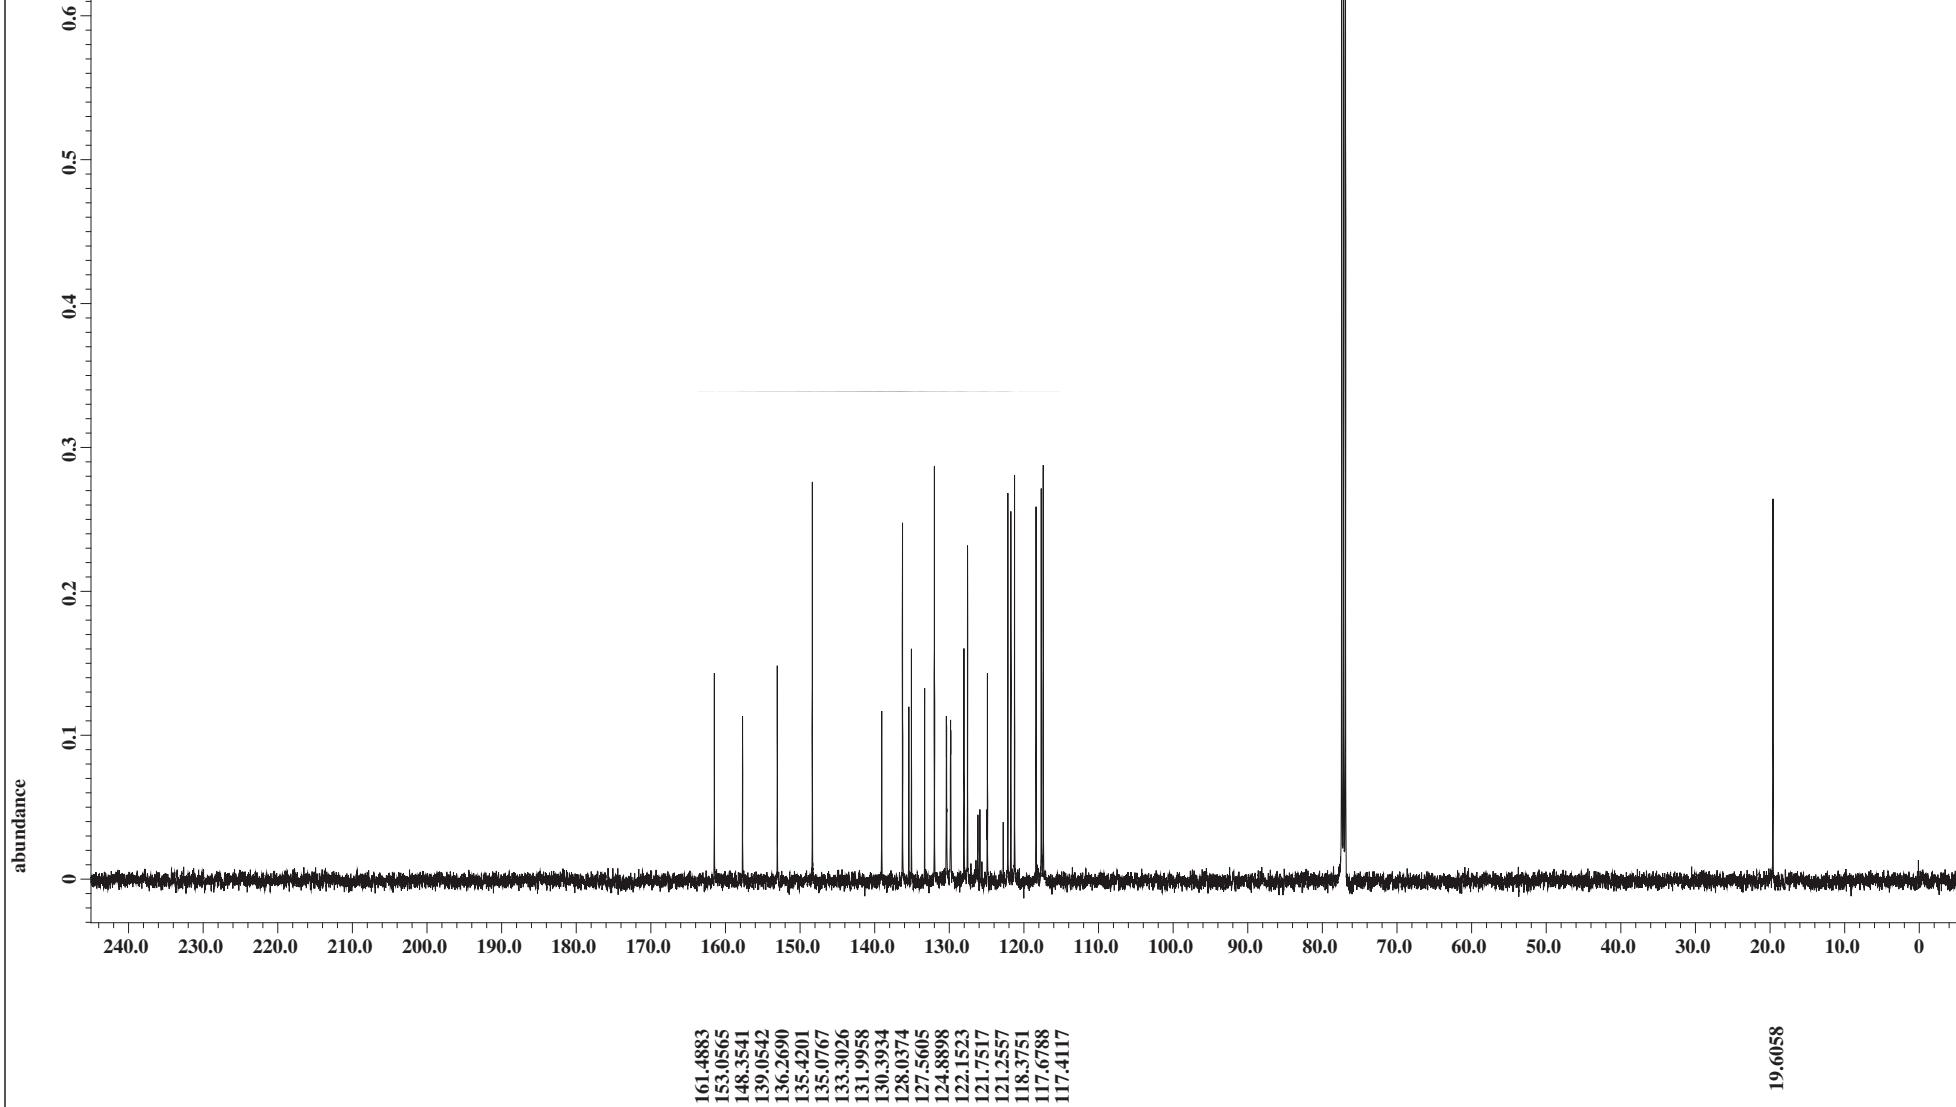

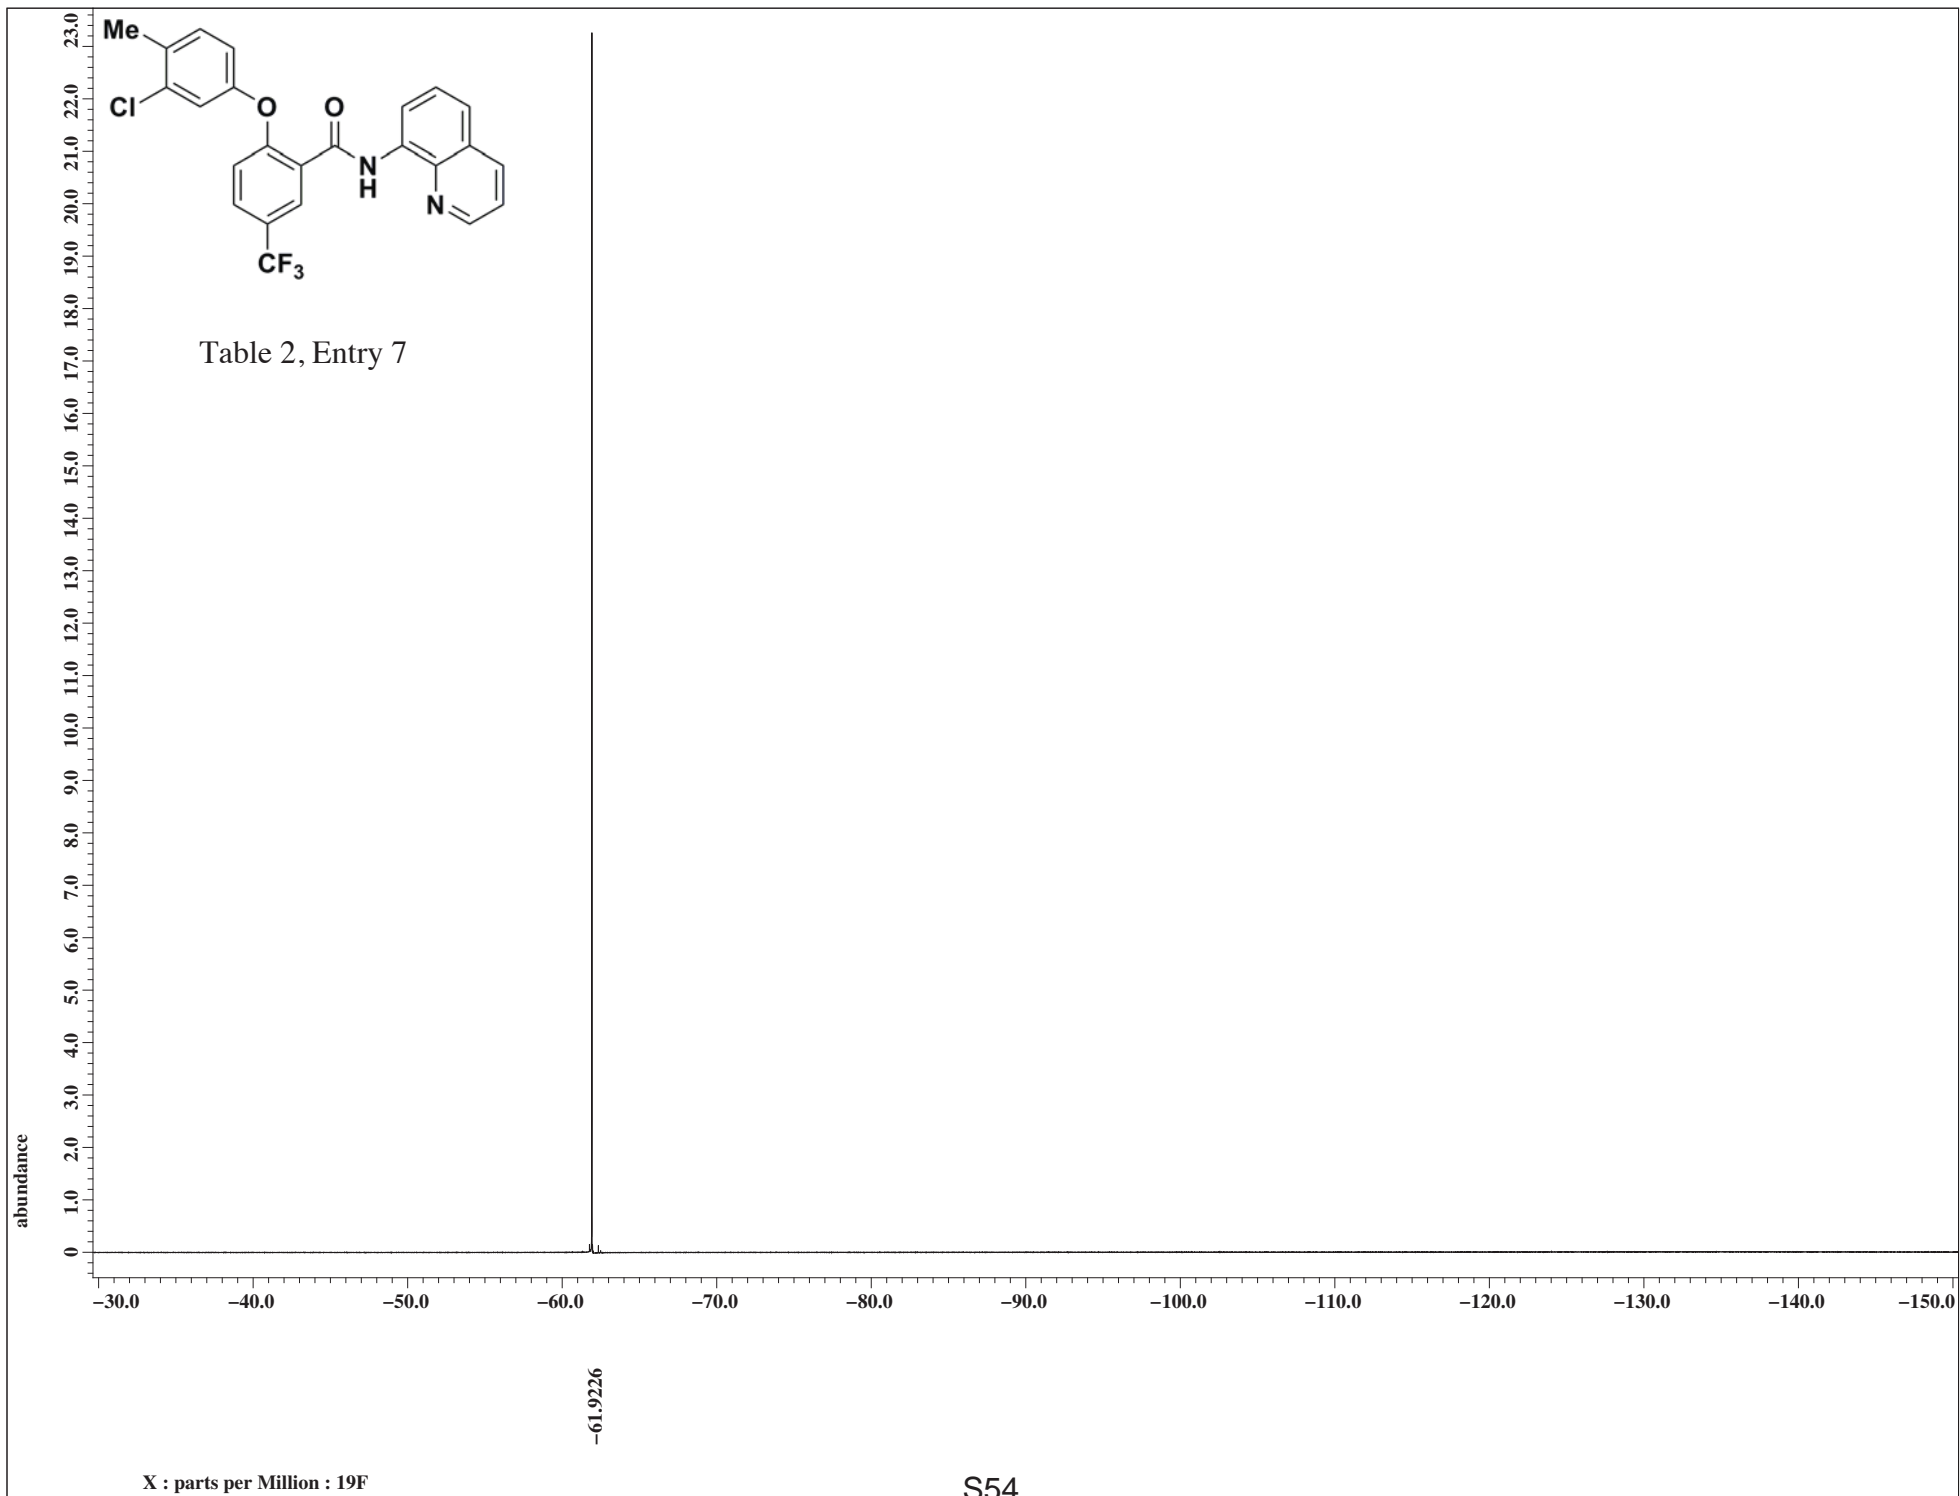

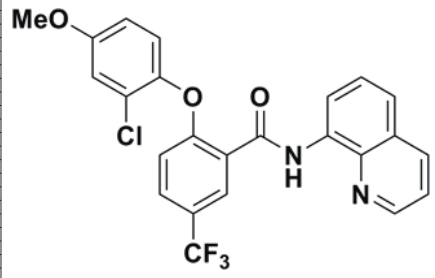

Table 2, Entry 8

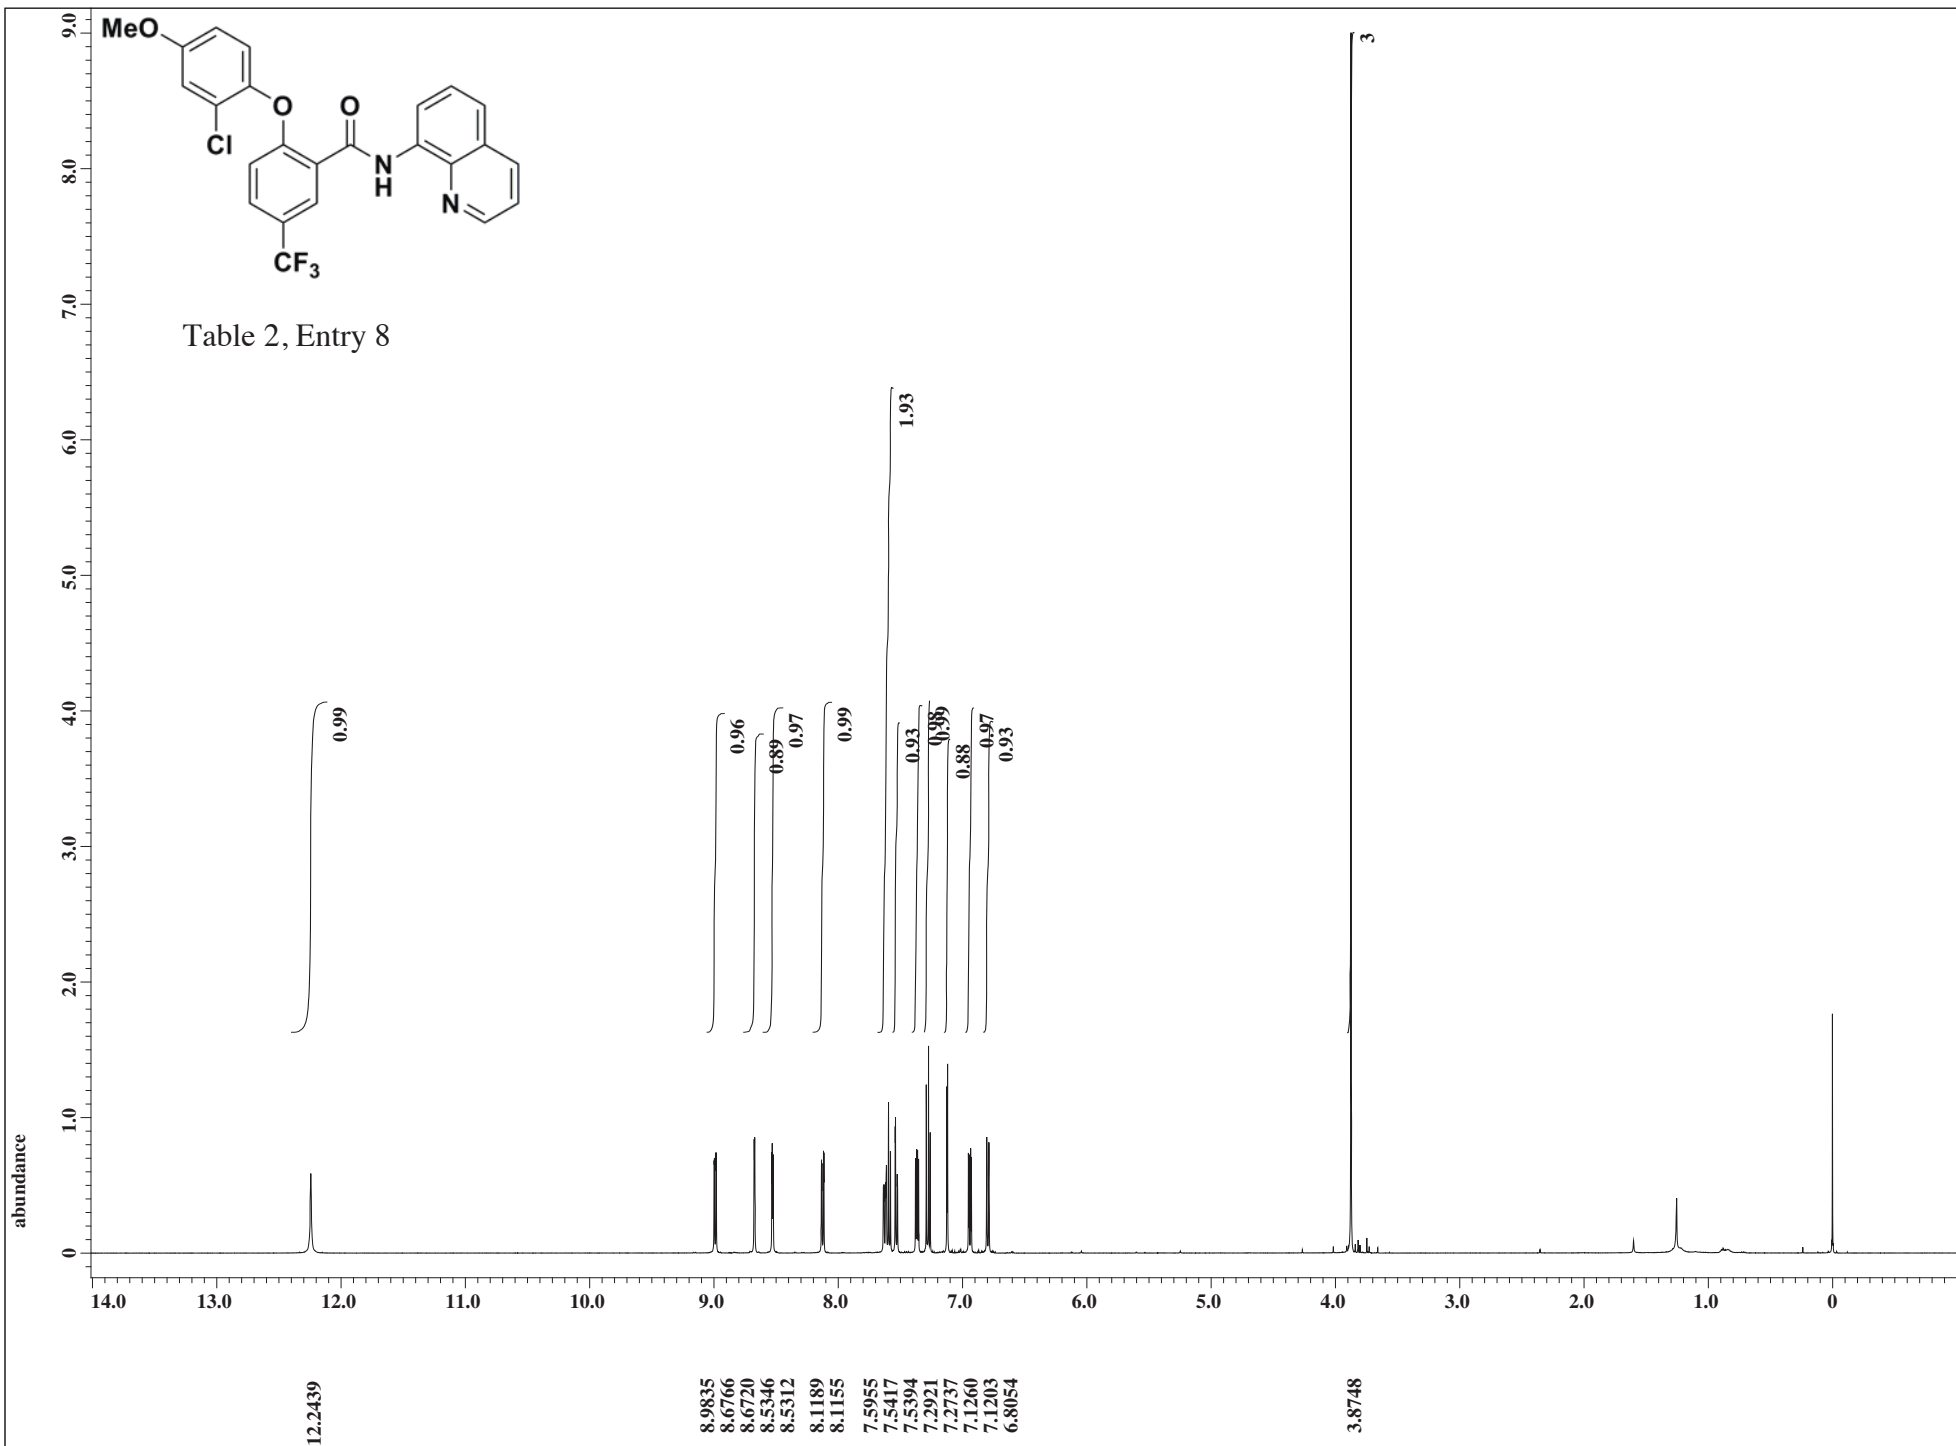

X : parts per Million : 1H

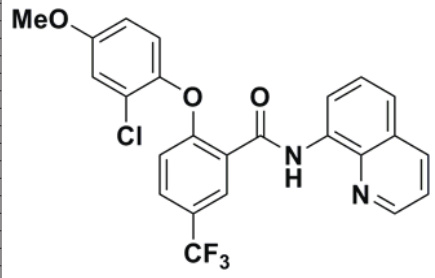

Table 2, Entry 8

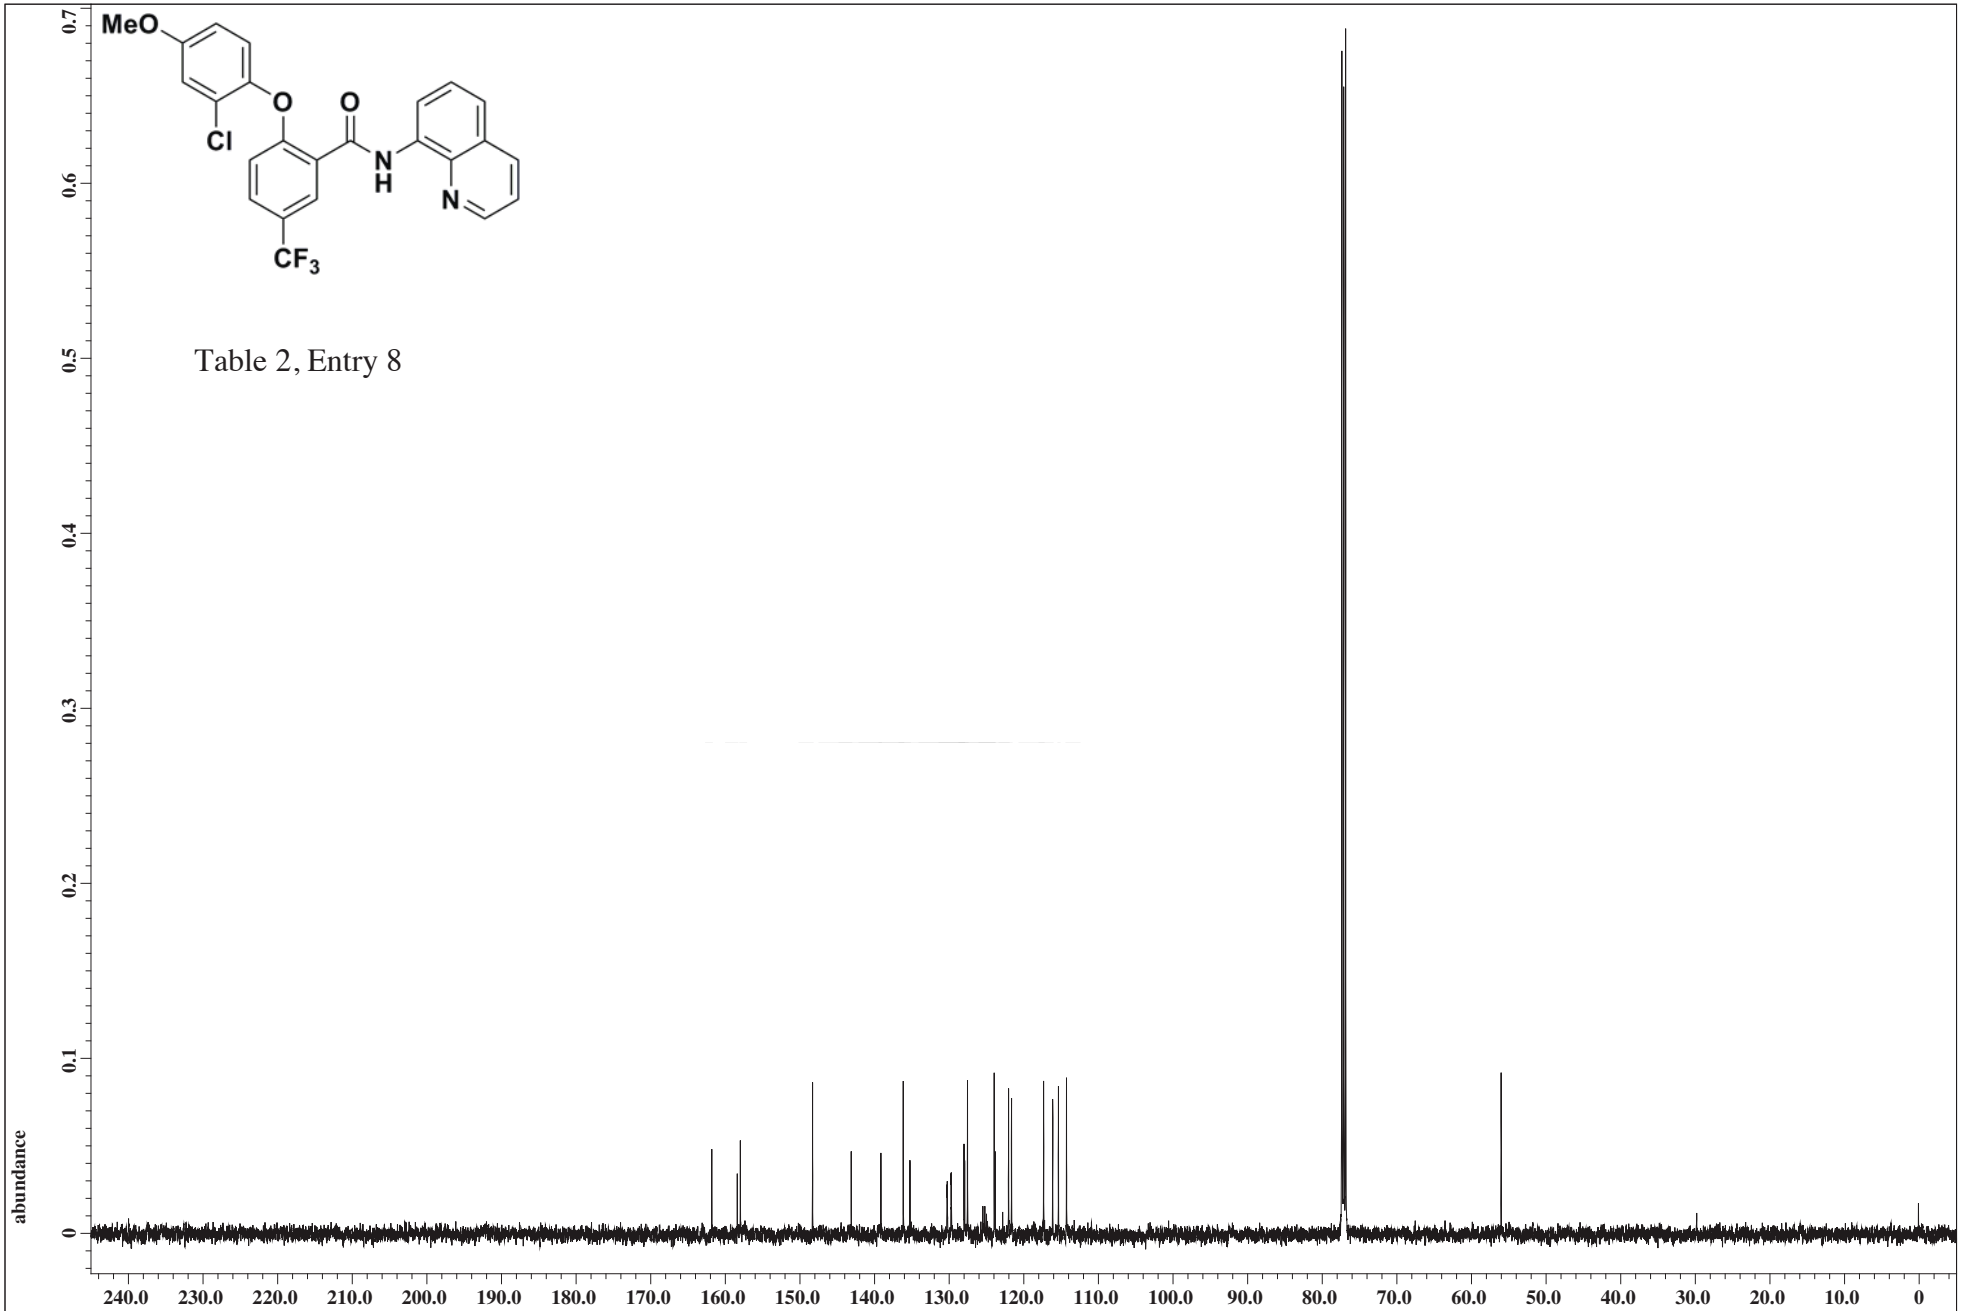

- 161.8160
- 158.4013
- 157.9911
- 148.3098
- 143.1304
- 139.1530
- 136.1579
- 135.2613
- 128.0122
- 127.5448
- 123.9679
- 123.8439
- 122.0412
- 121.6406
- 117.3483
- 116.1370
- 115.3548
- 114.2770

56.0265

X : parts per Million : 13C

S56



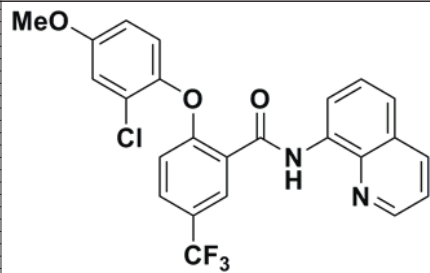

Table 2, Entry 8

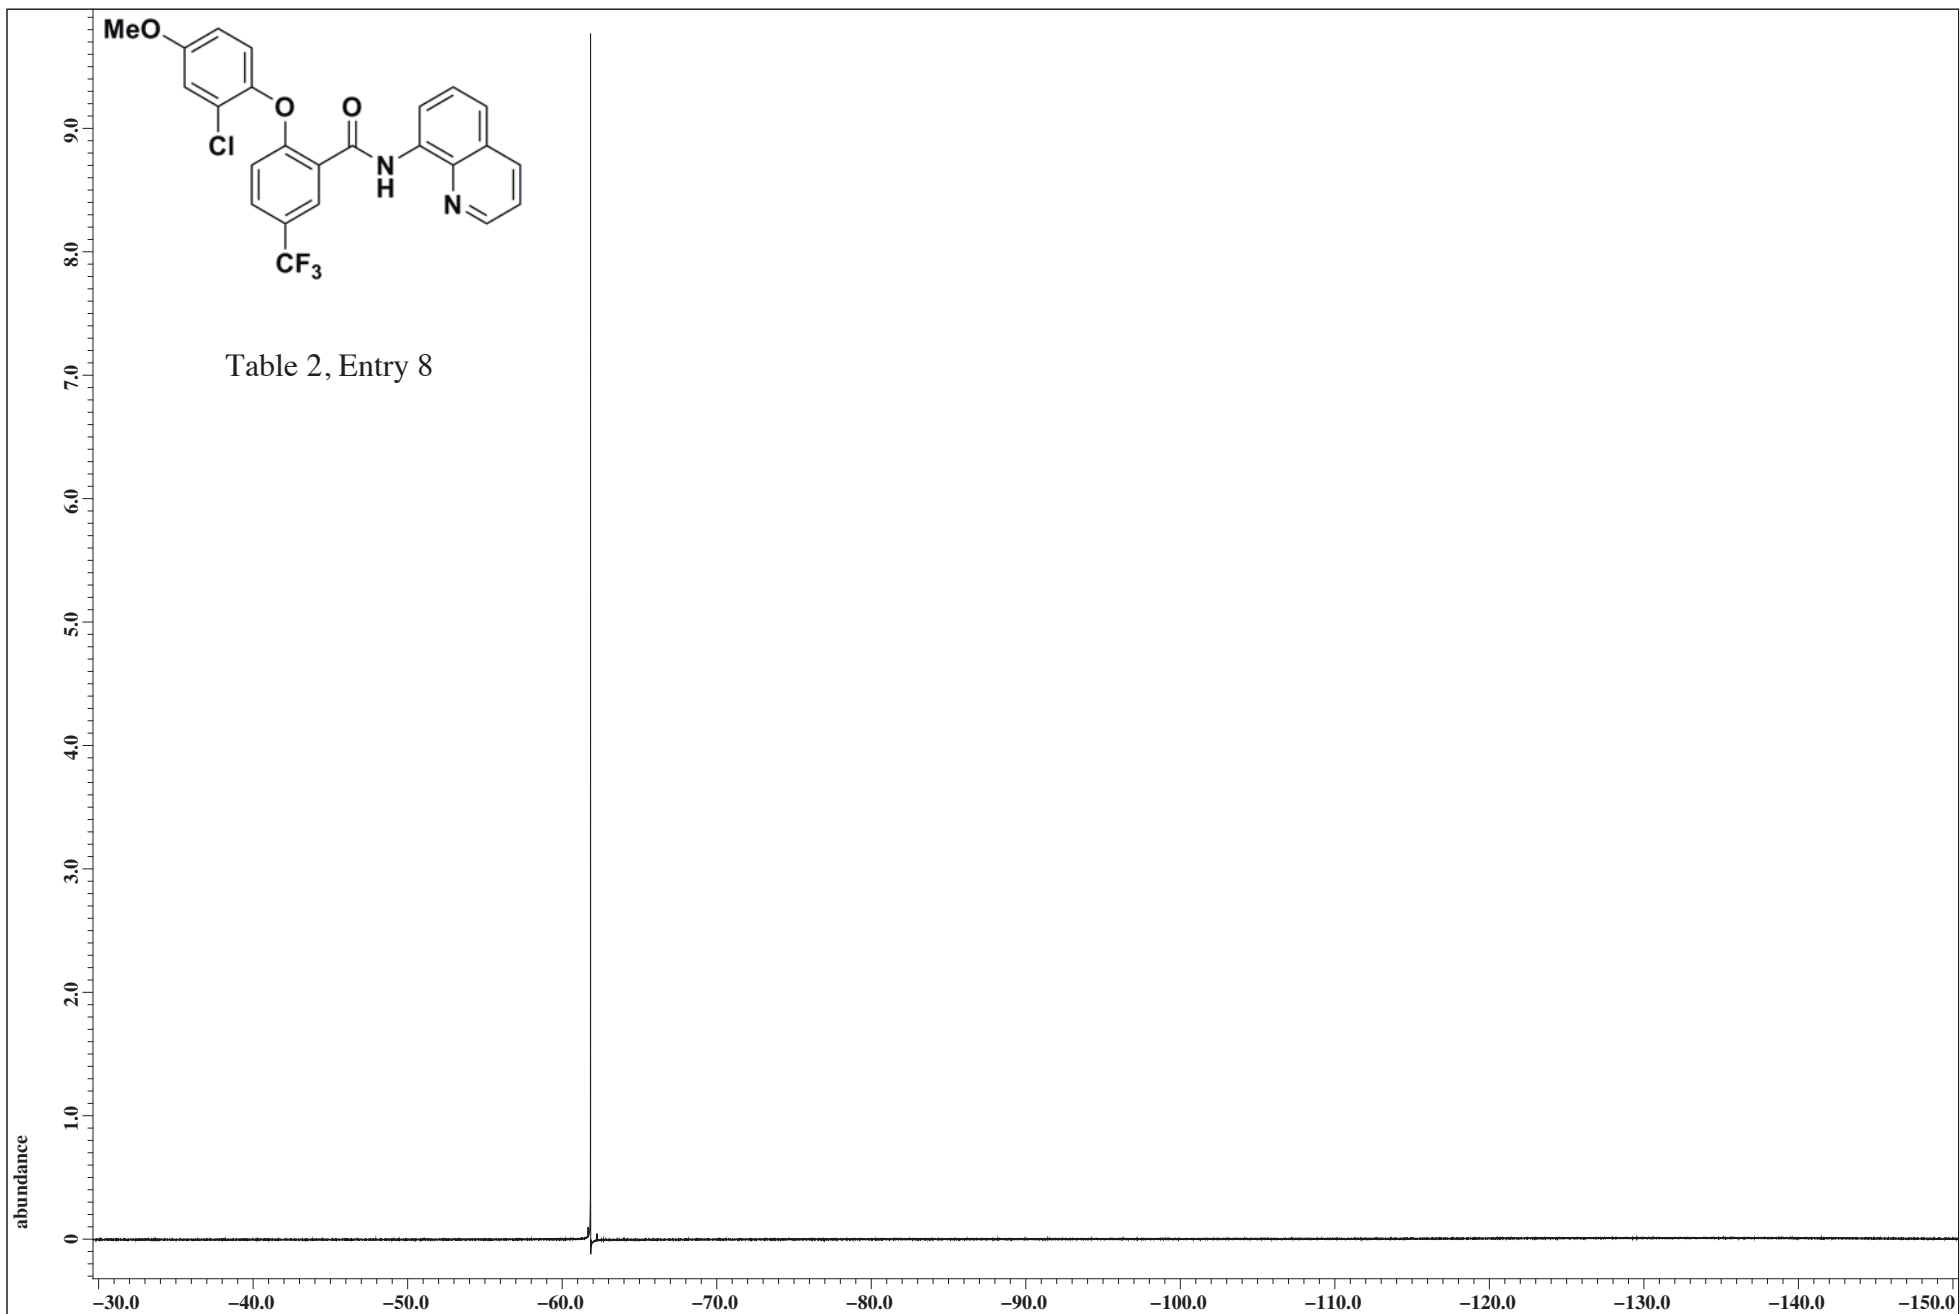

-61.8351

X : parts per Million : 19F

S57

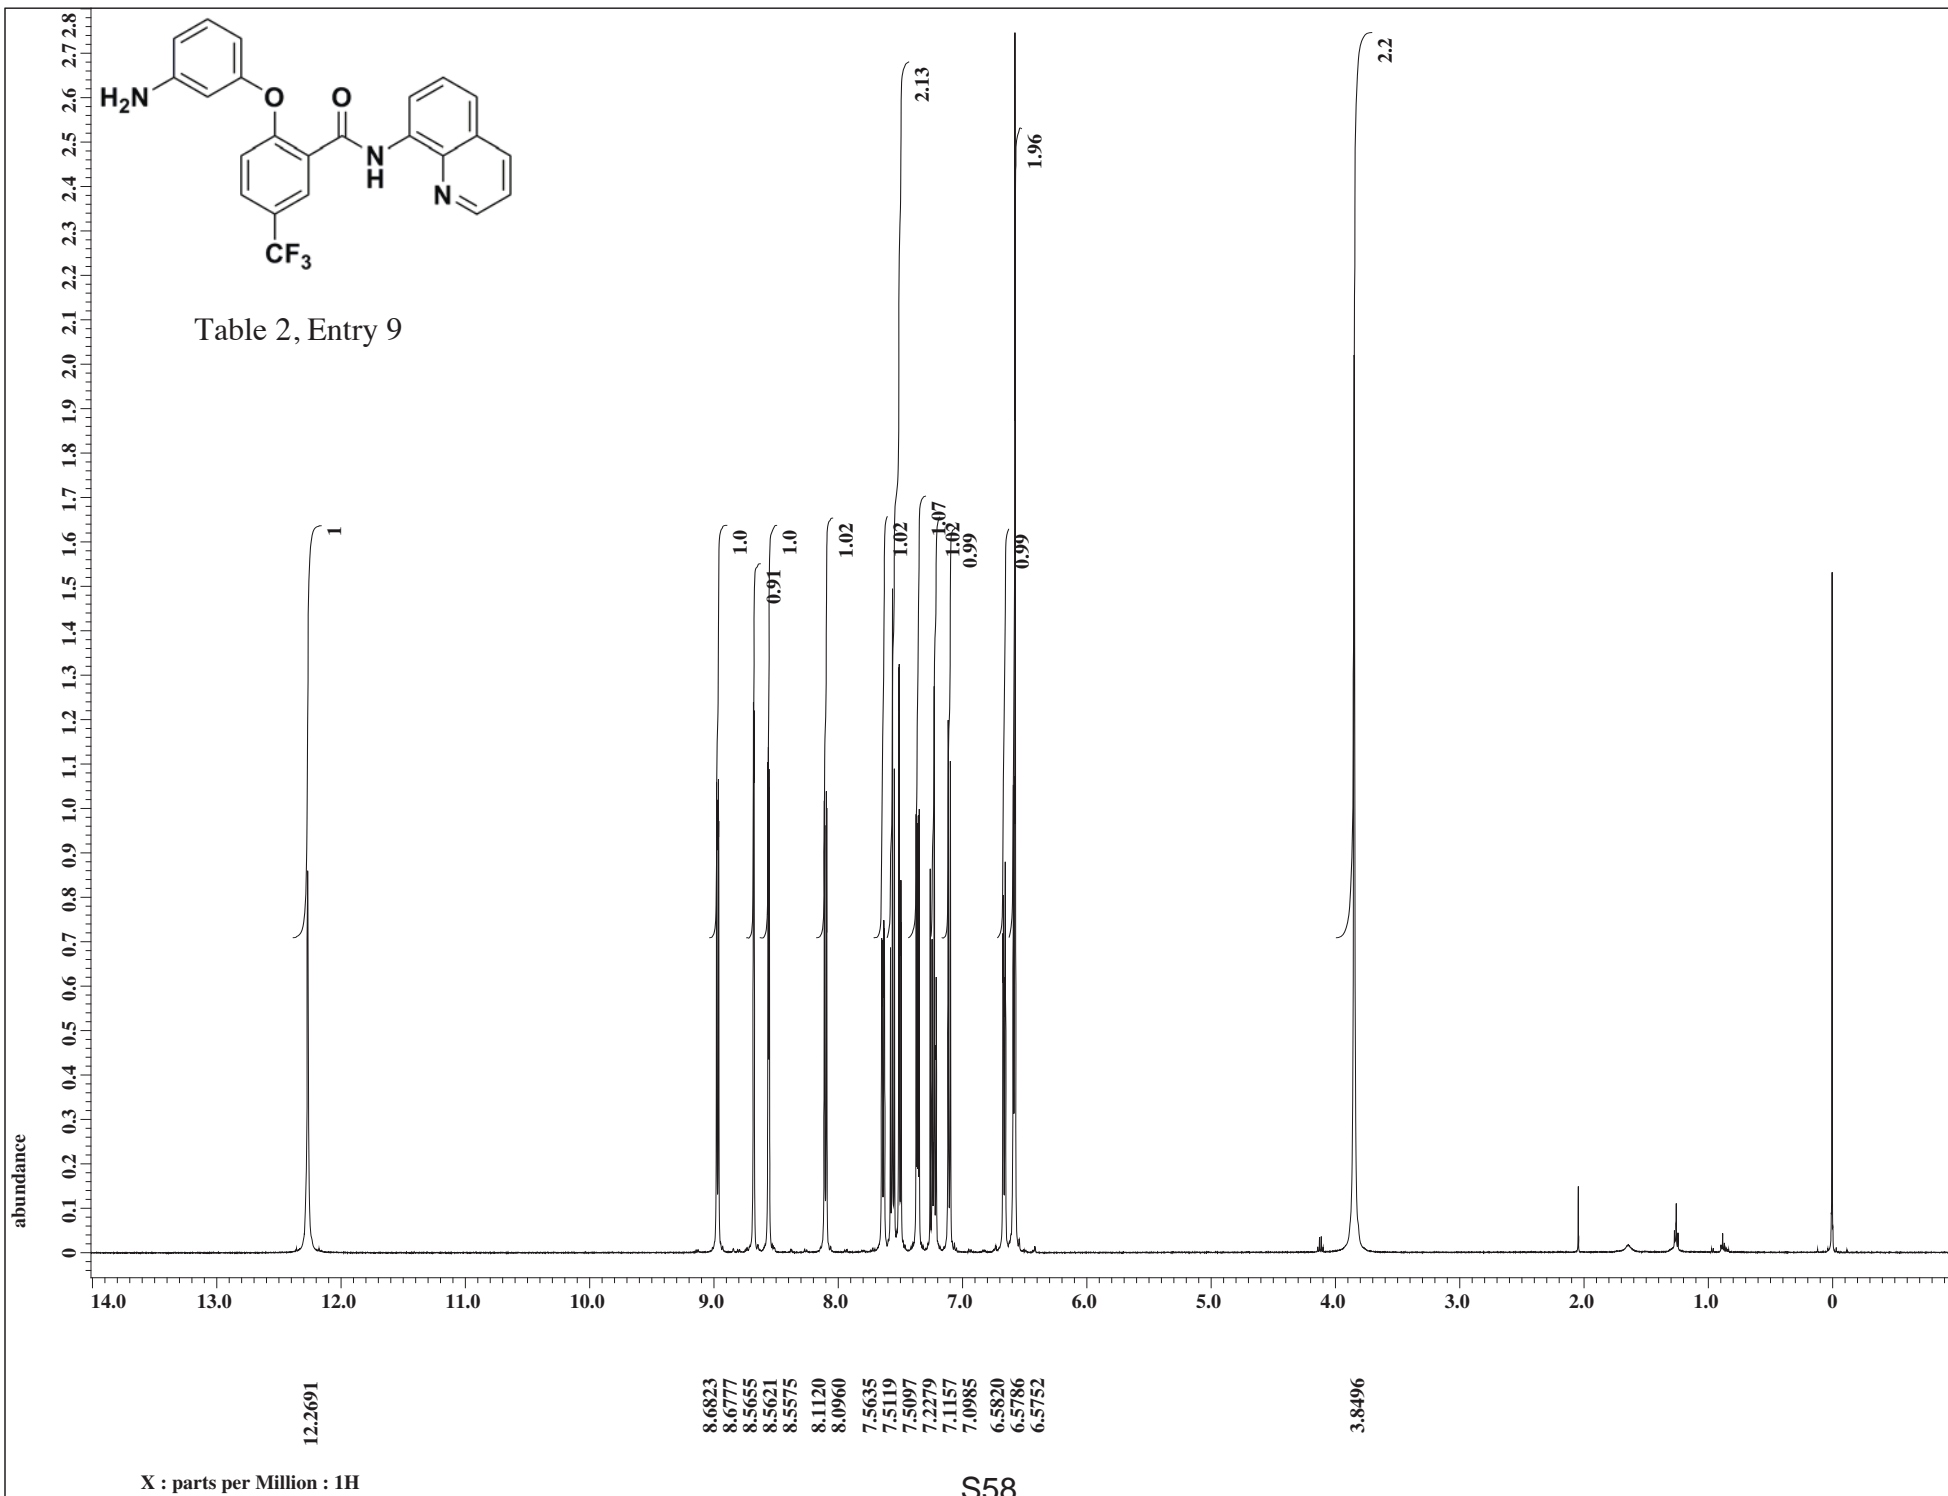

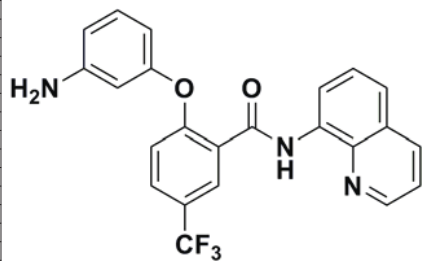

Table 2, Entry 9

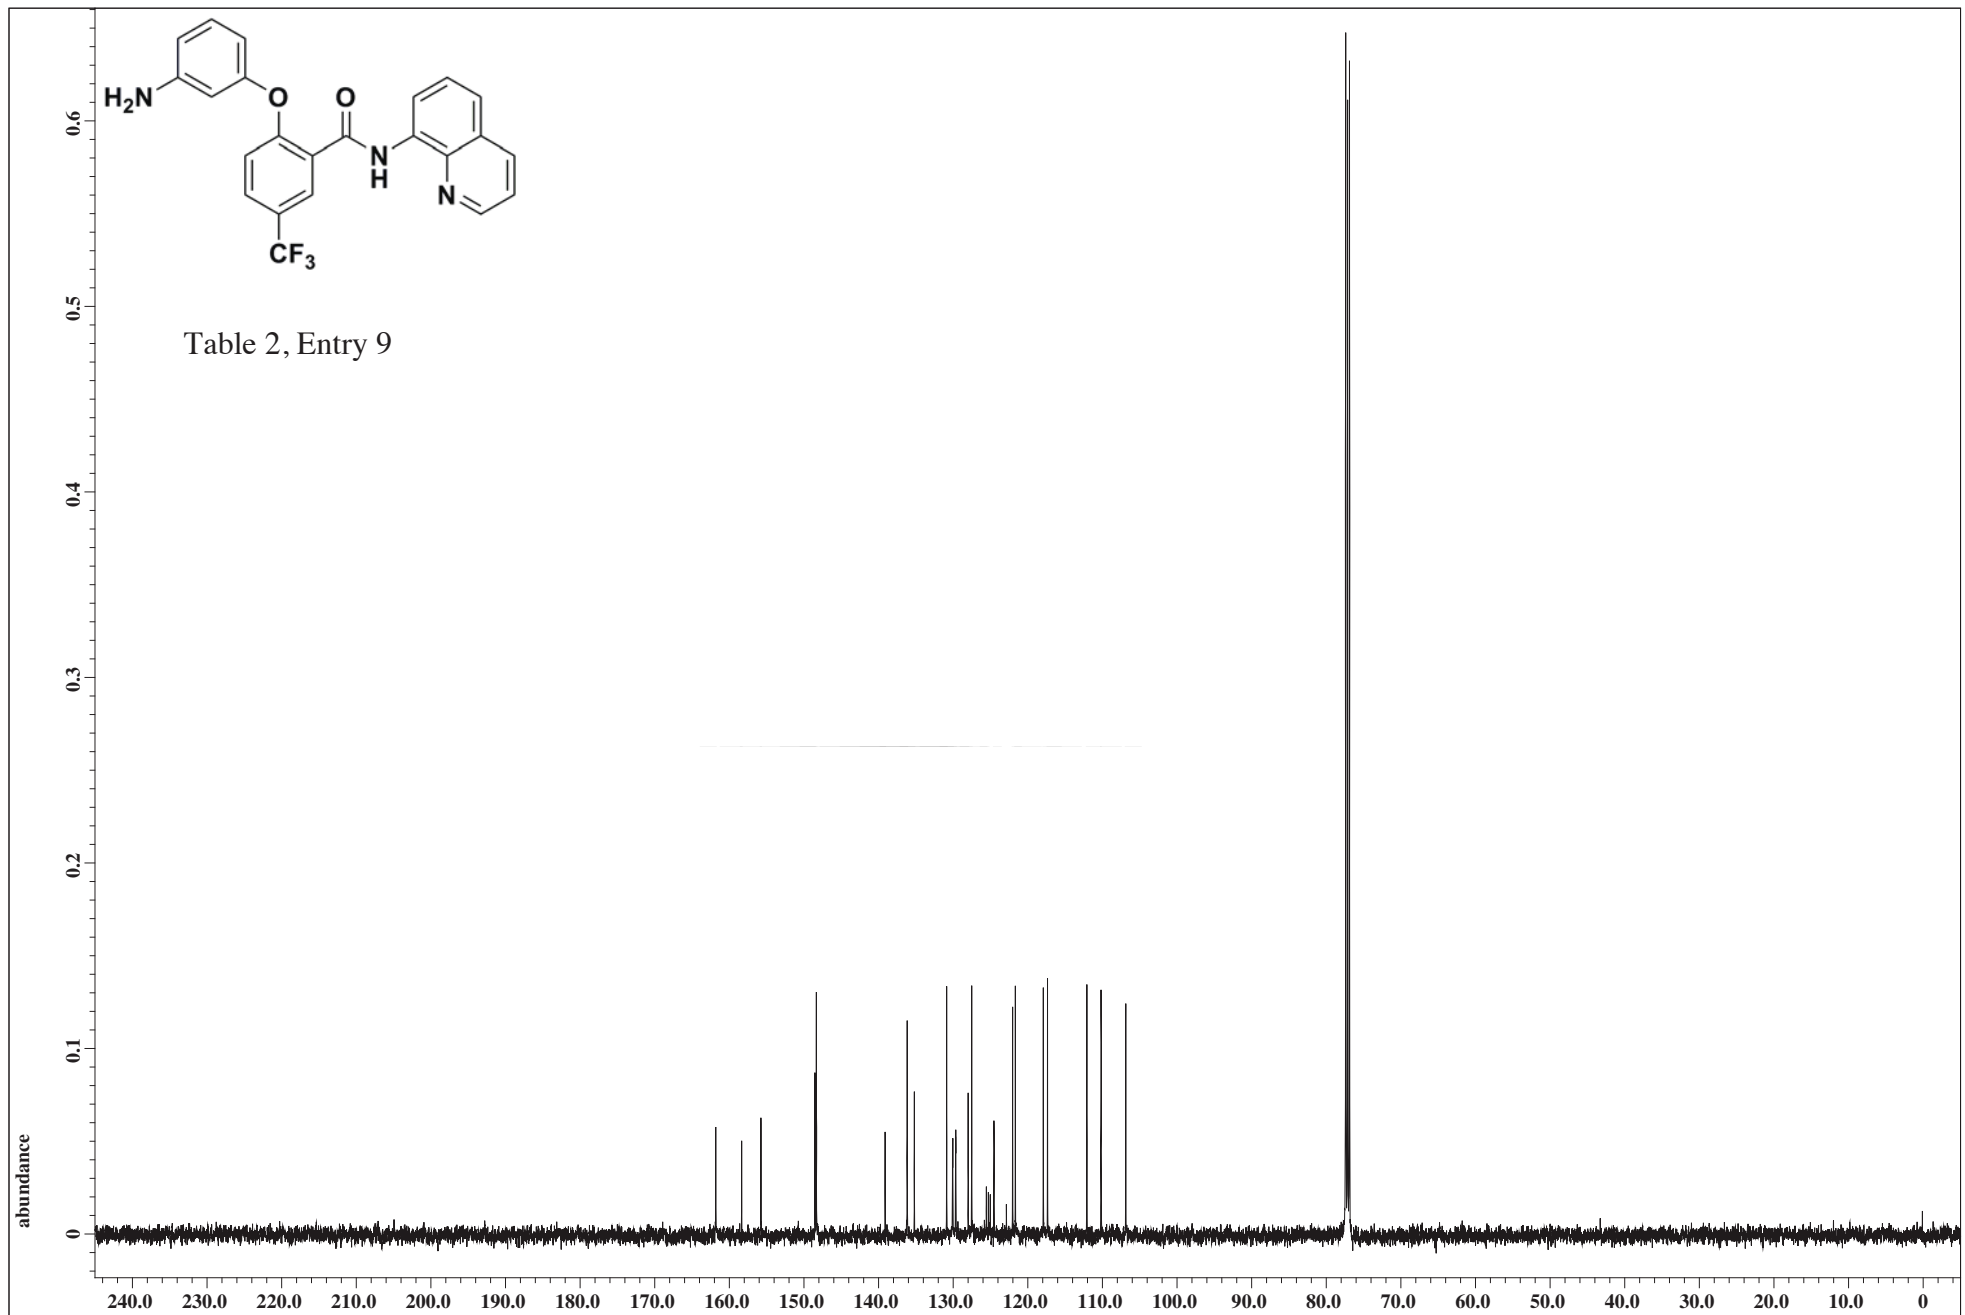

- 161.8160
- 158.3536
- 155.7687
- 148.5387
- 148.3384
- 139.1243
- 136.1675
- 135.2041
- 130.8737
- 130.0534
- 129.6528
- 127.9931
- 127.5162
- 125.5513
- 125.2842
- 124.5402
- 122.0317
- 121.6692
- 117.9206
- 117.3579
- 112.0832
- 110.1851
- 106.8657

X : parts per Million : 13C

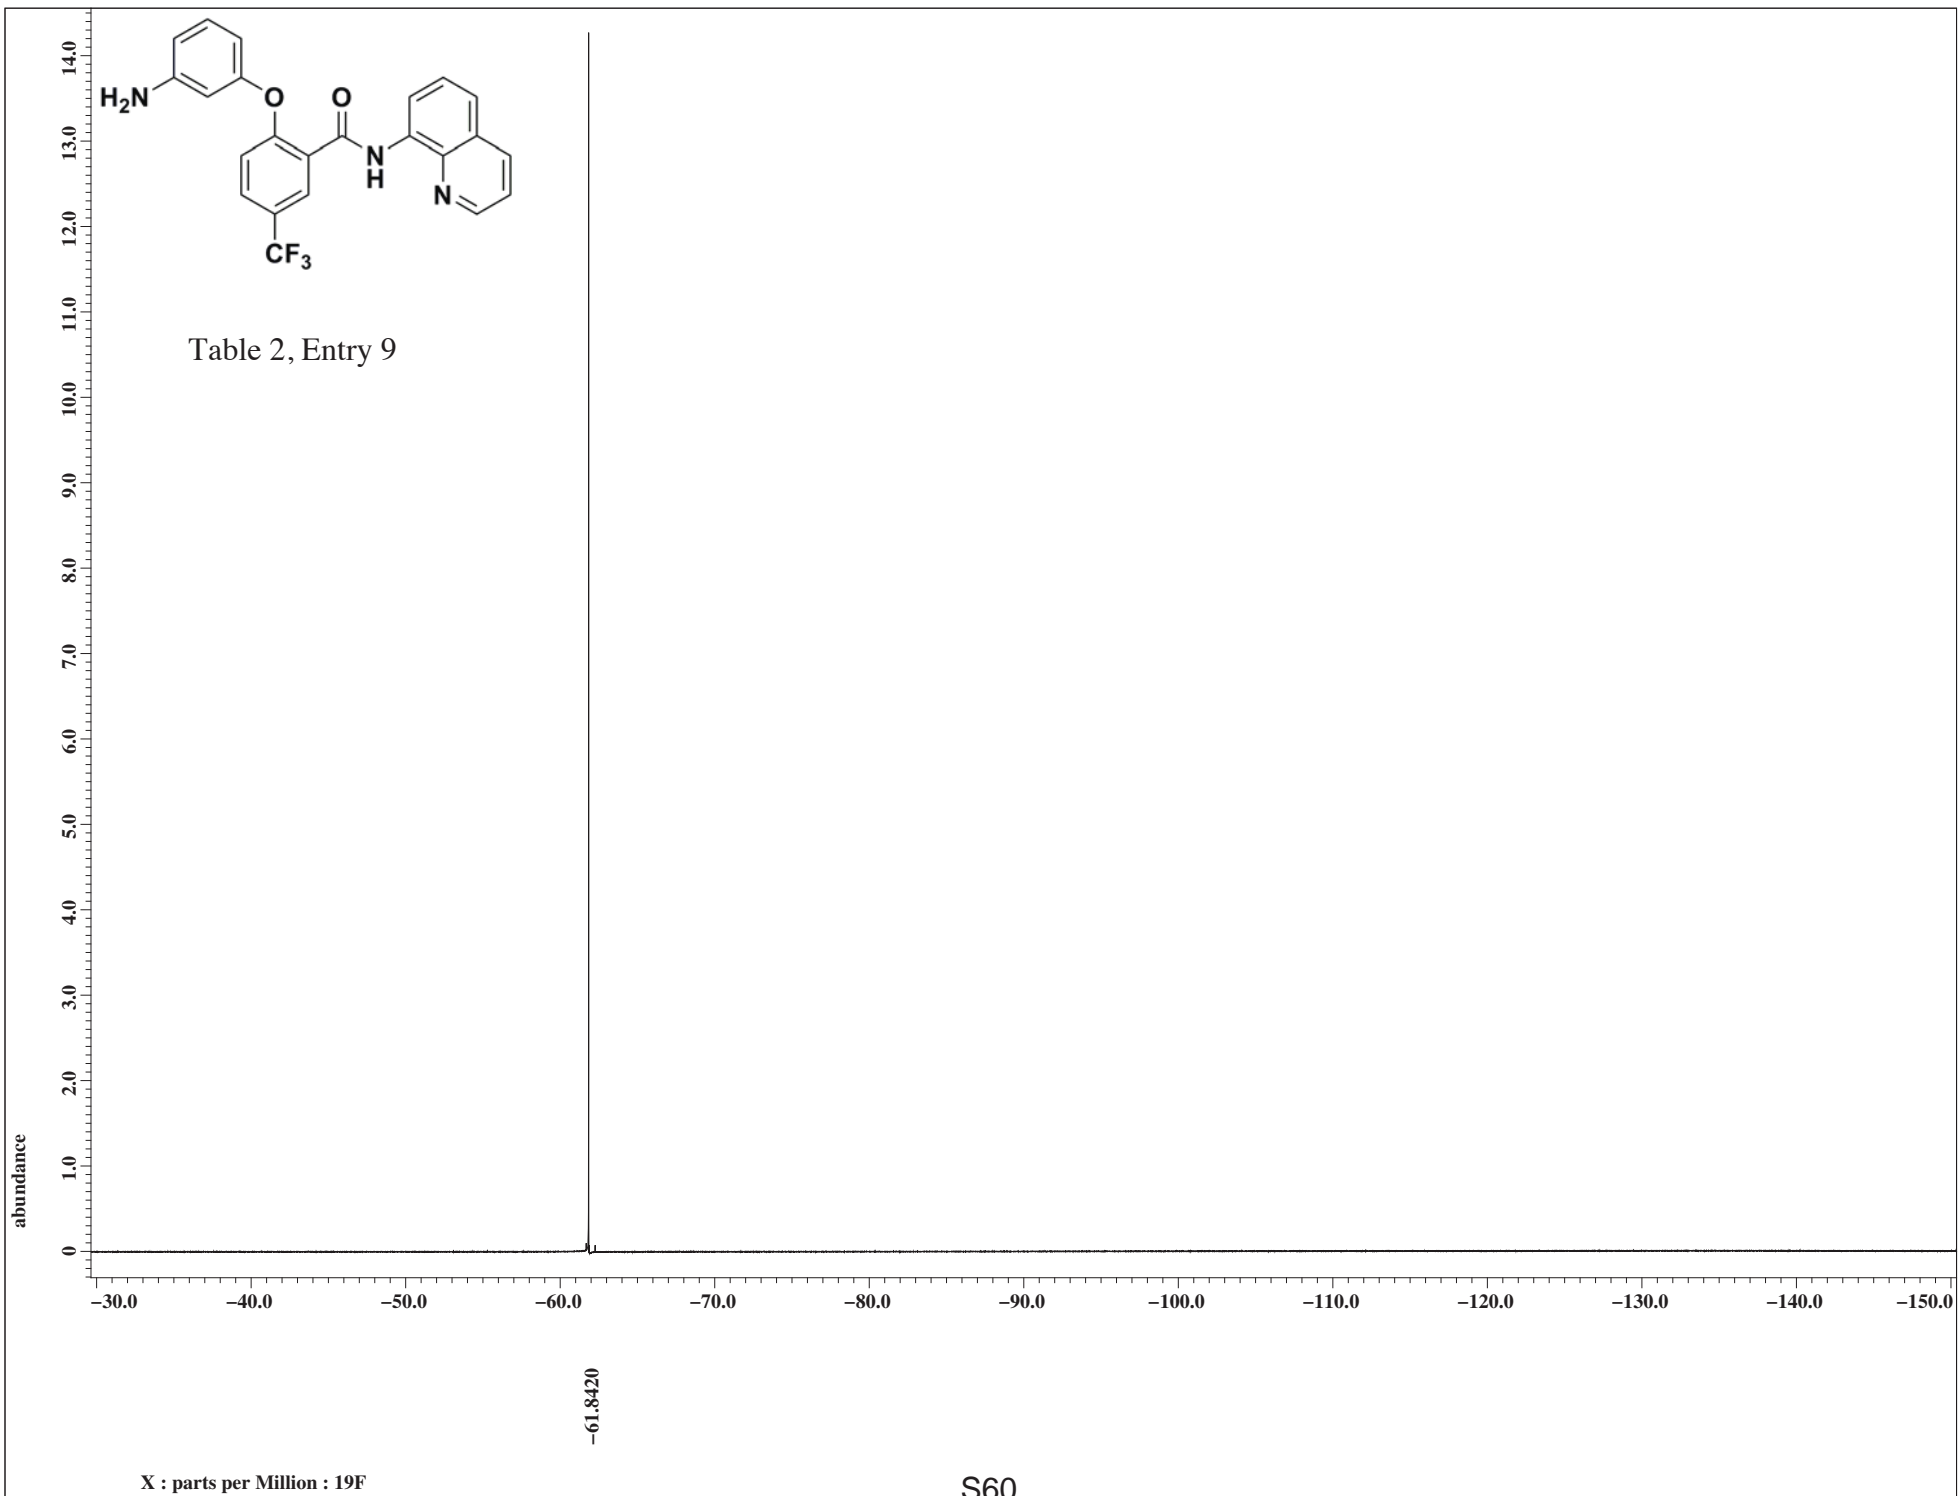

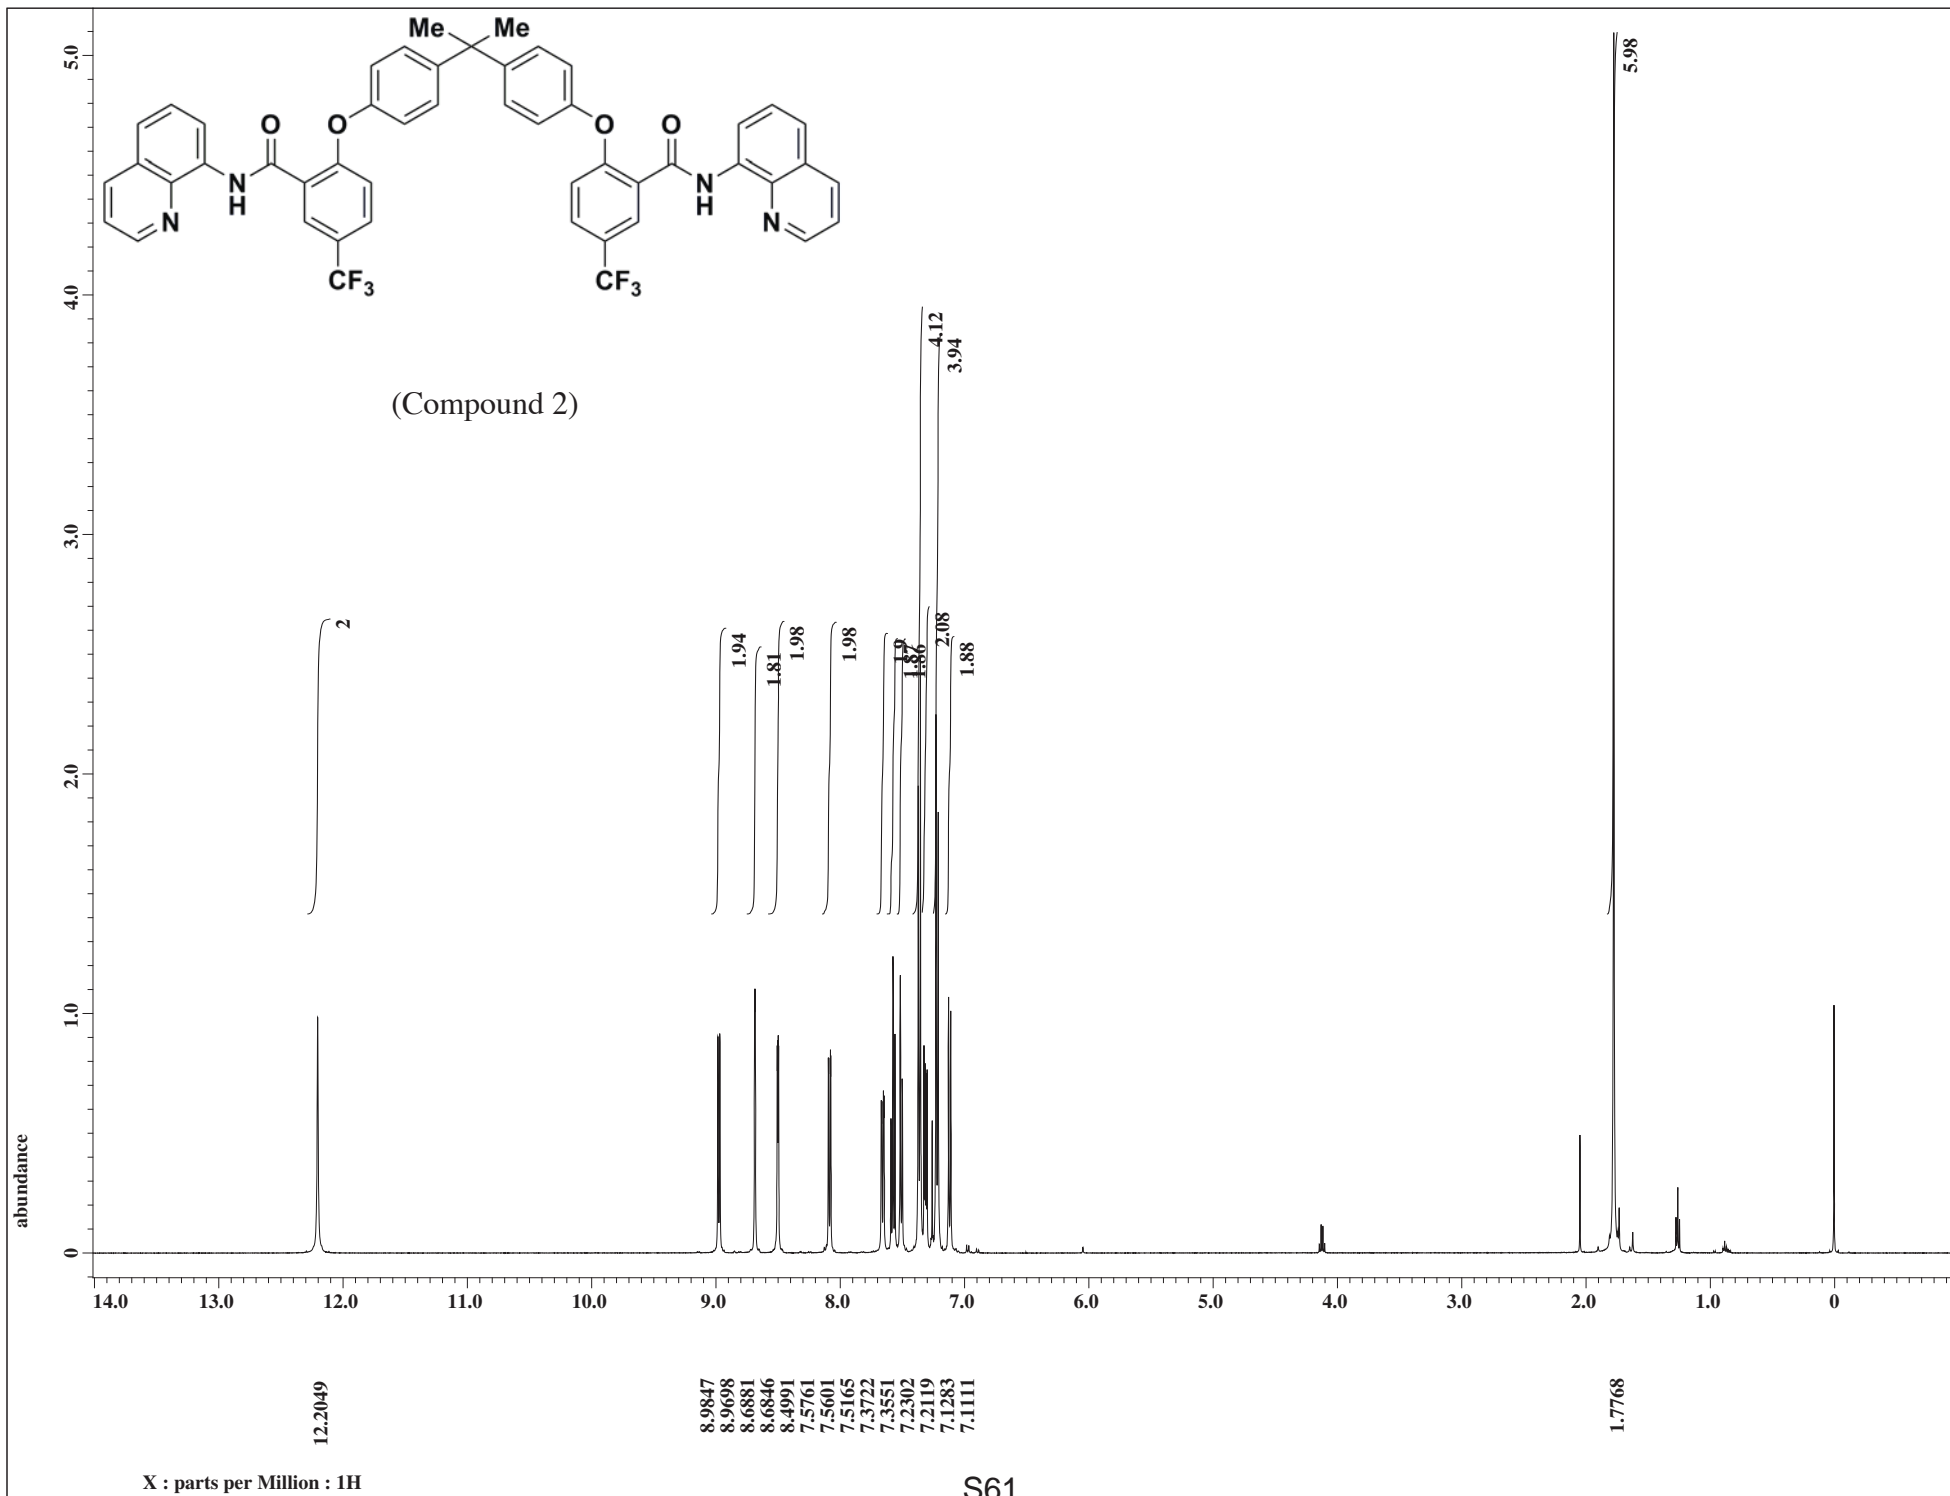

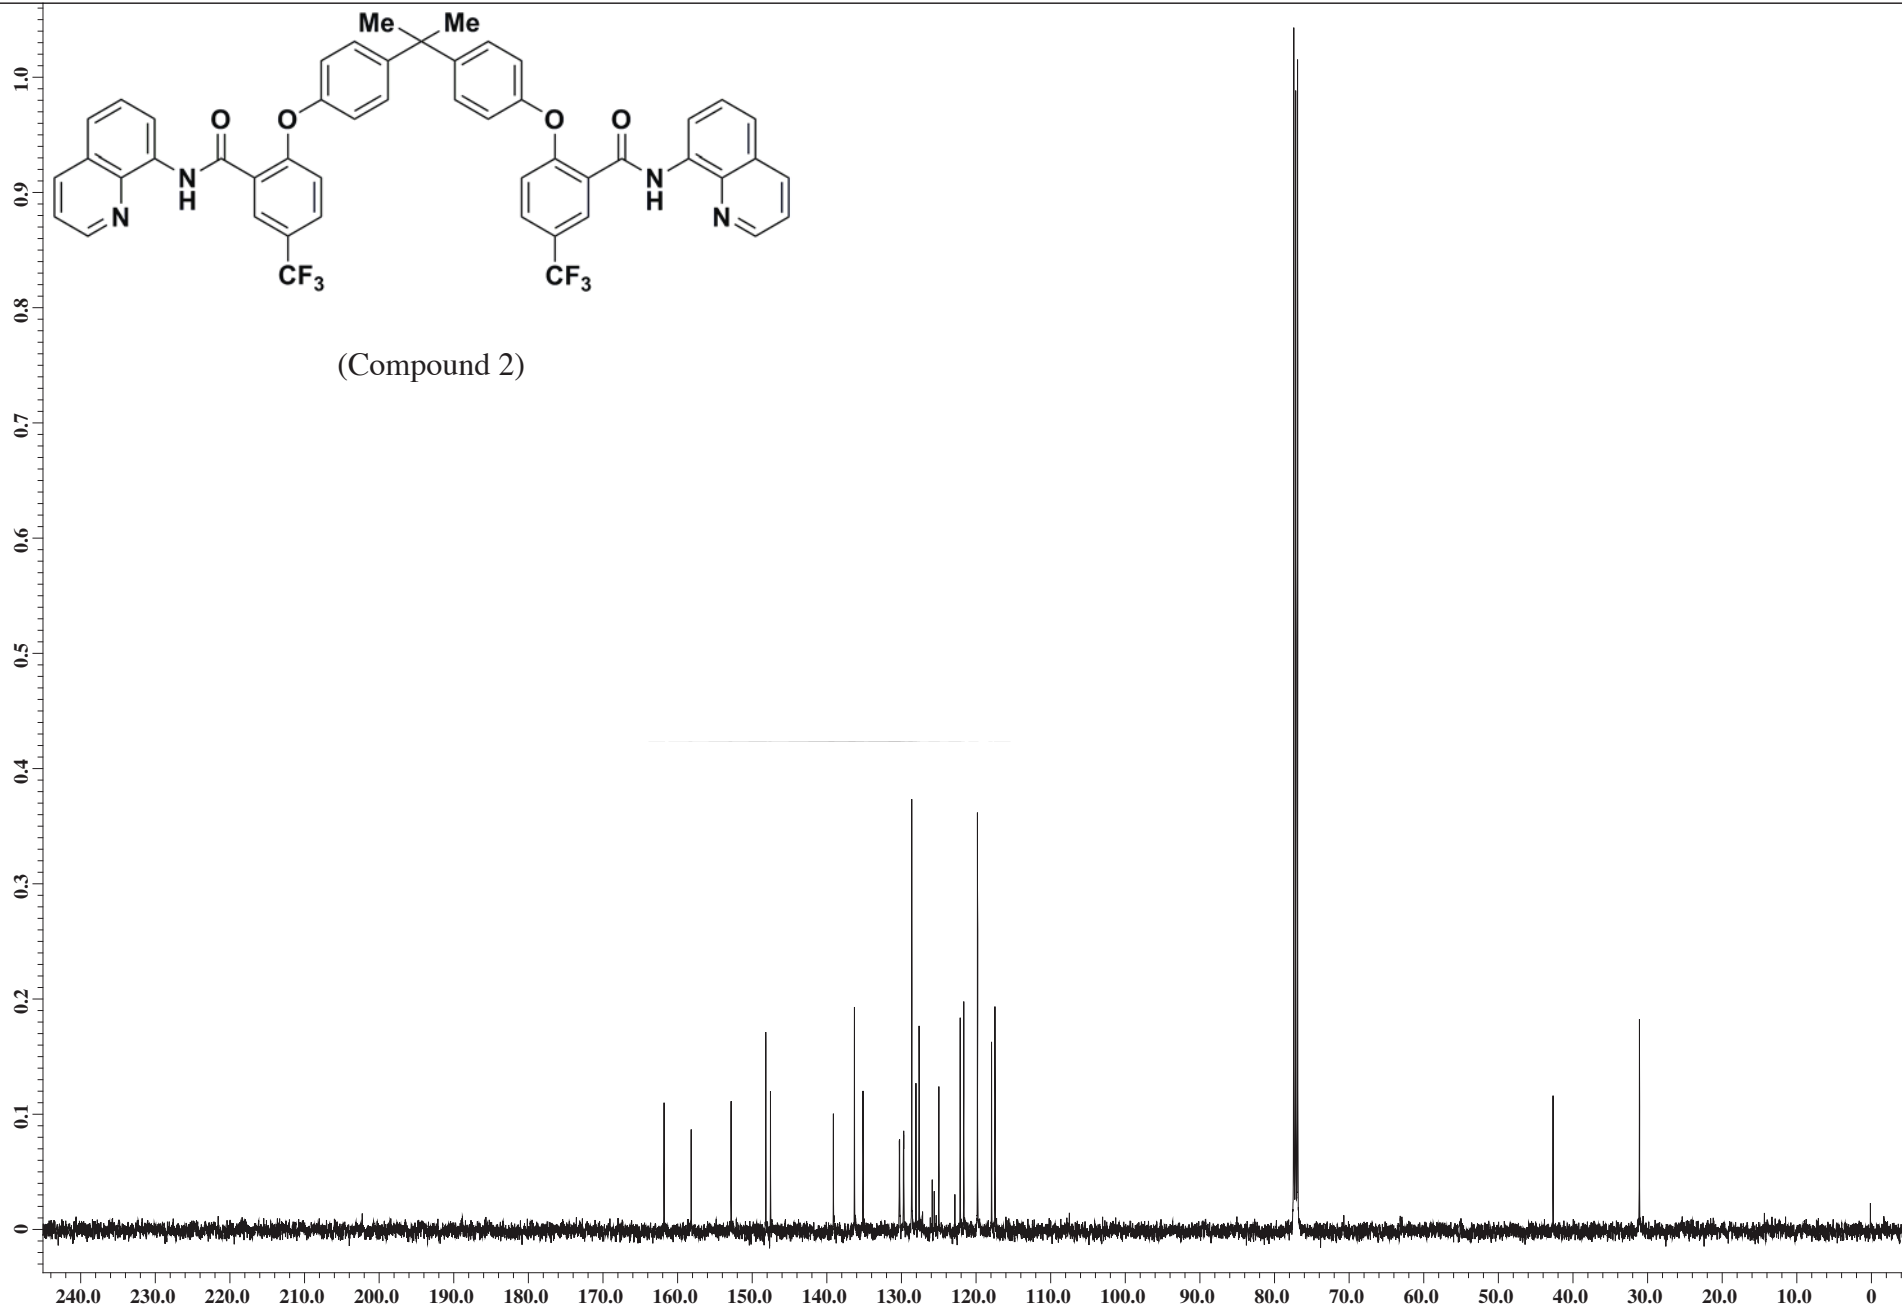

(Compound 2)

abundance

240.0 230.0 220.0 210.0 200.0 190.0 180.0 170.0 160.0 150.0 140.0 130.0 120.0 110.0 100.0 90.0 80.0 70.0 60.0 50.0 40.0 30.0 20.0 10.0 0

- 161.8128
- 158.1787
- 152.8277
- 148.1825
- 147.5530
- 139.1211
- 136.2977
- 135.1532
- 130.2504
- 129.6972
- 128.6194
- 128.0566
- 127.6369
- 124.9853
- 122.1238
- 121.6469
- 119.8155
- 117.9269
- 117.4691

- 42.6695
- 31.0900

X : parts per Million : 13C

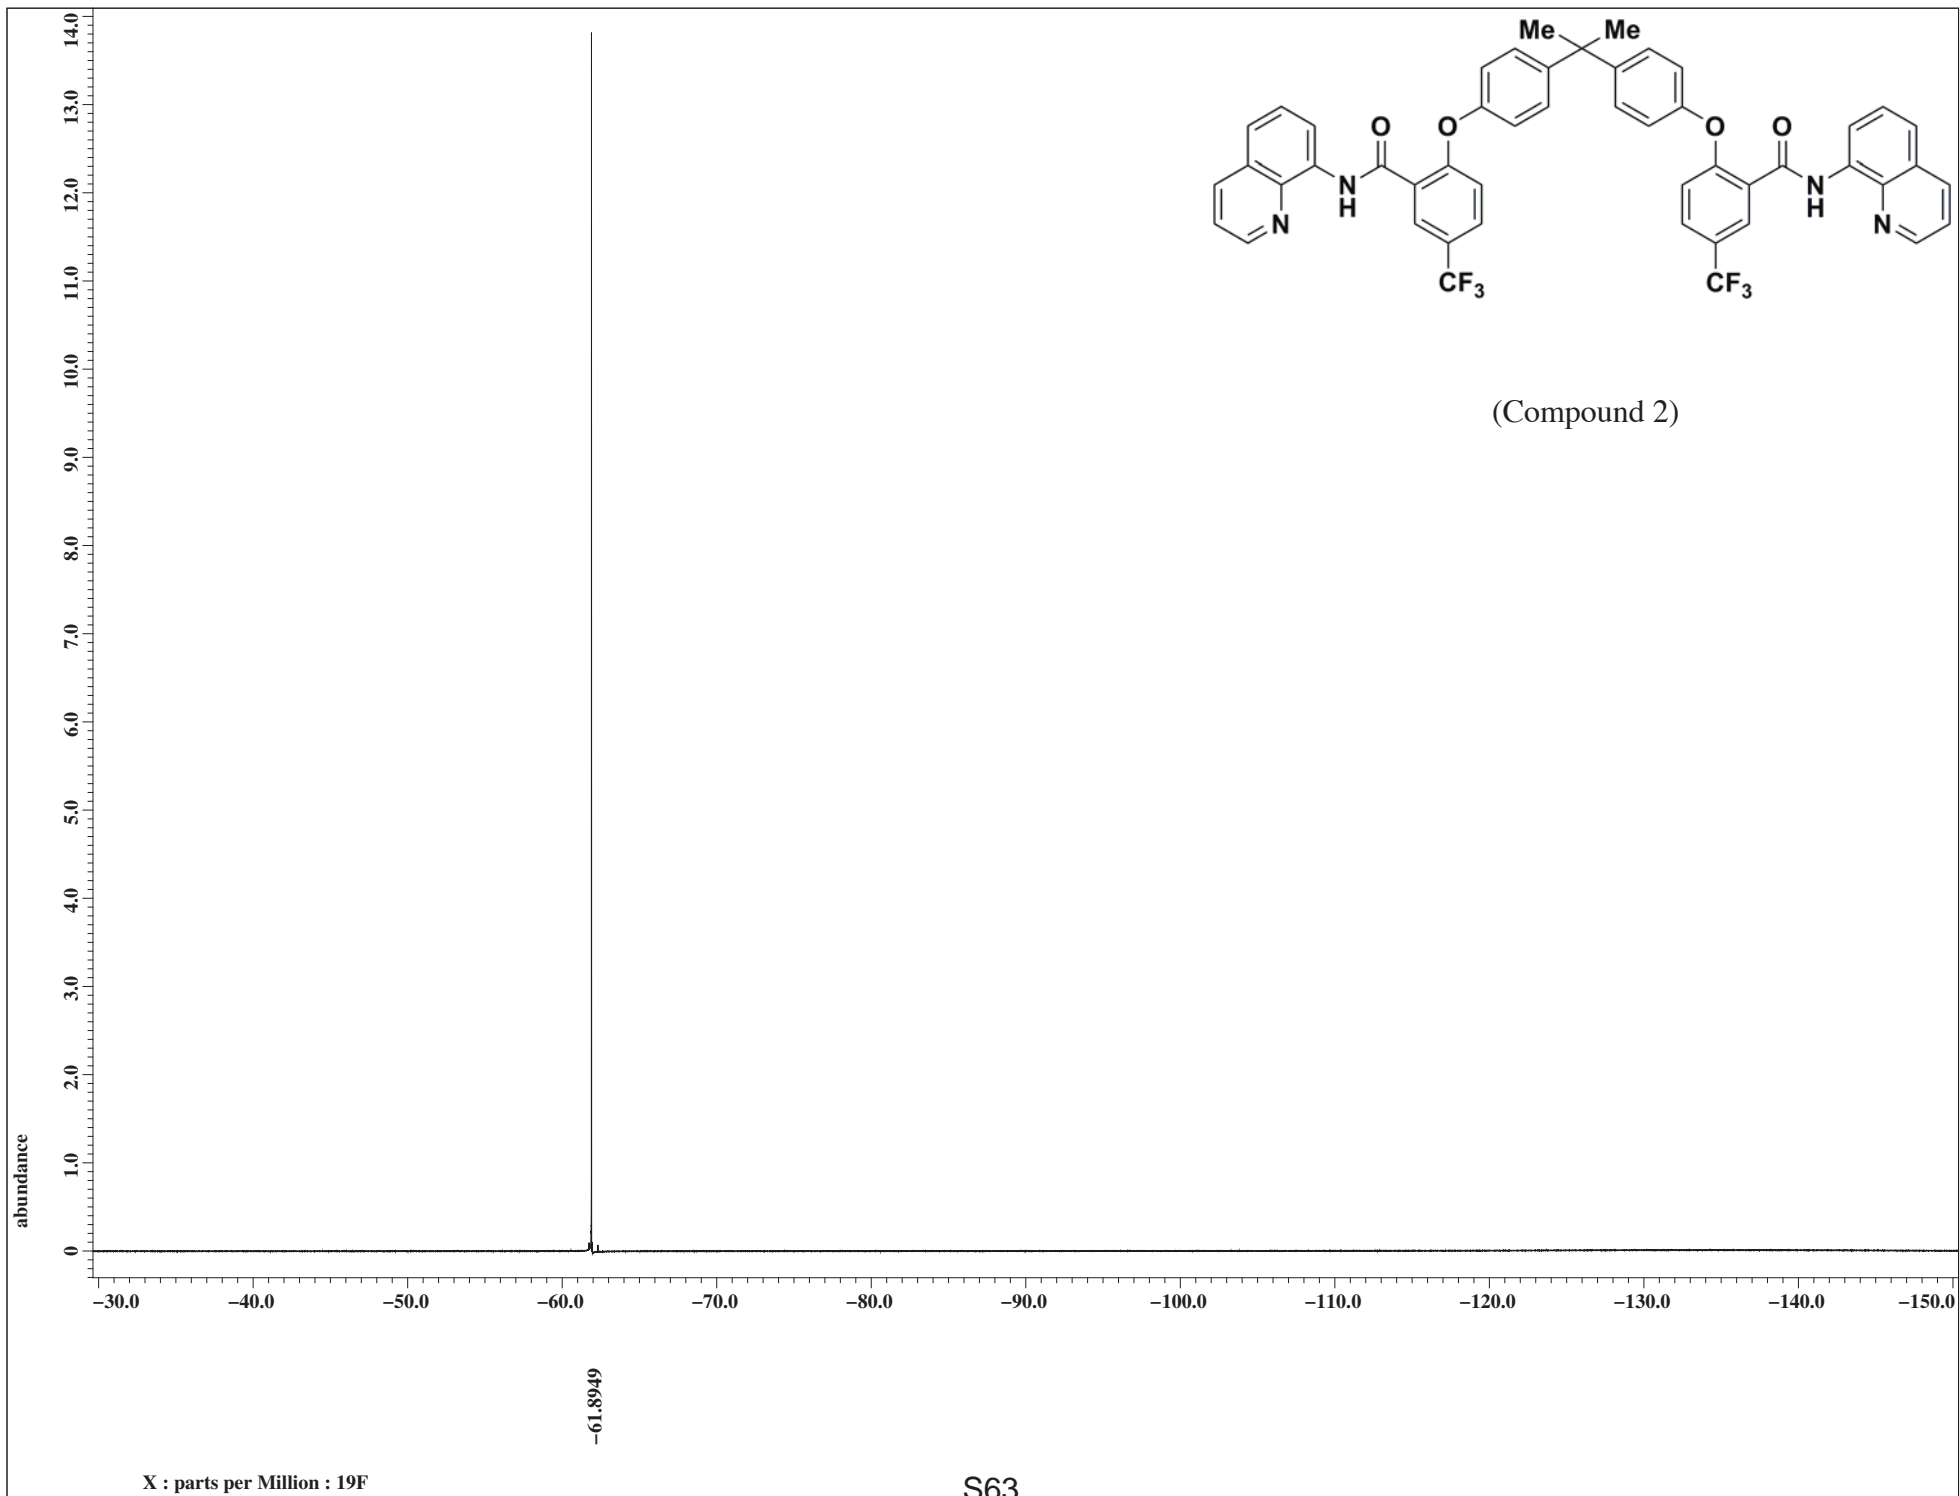

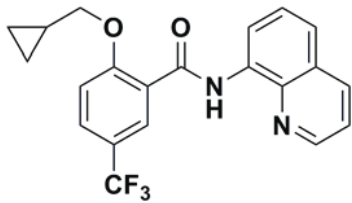

Table 3, Entry 1

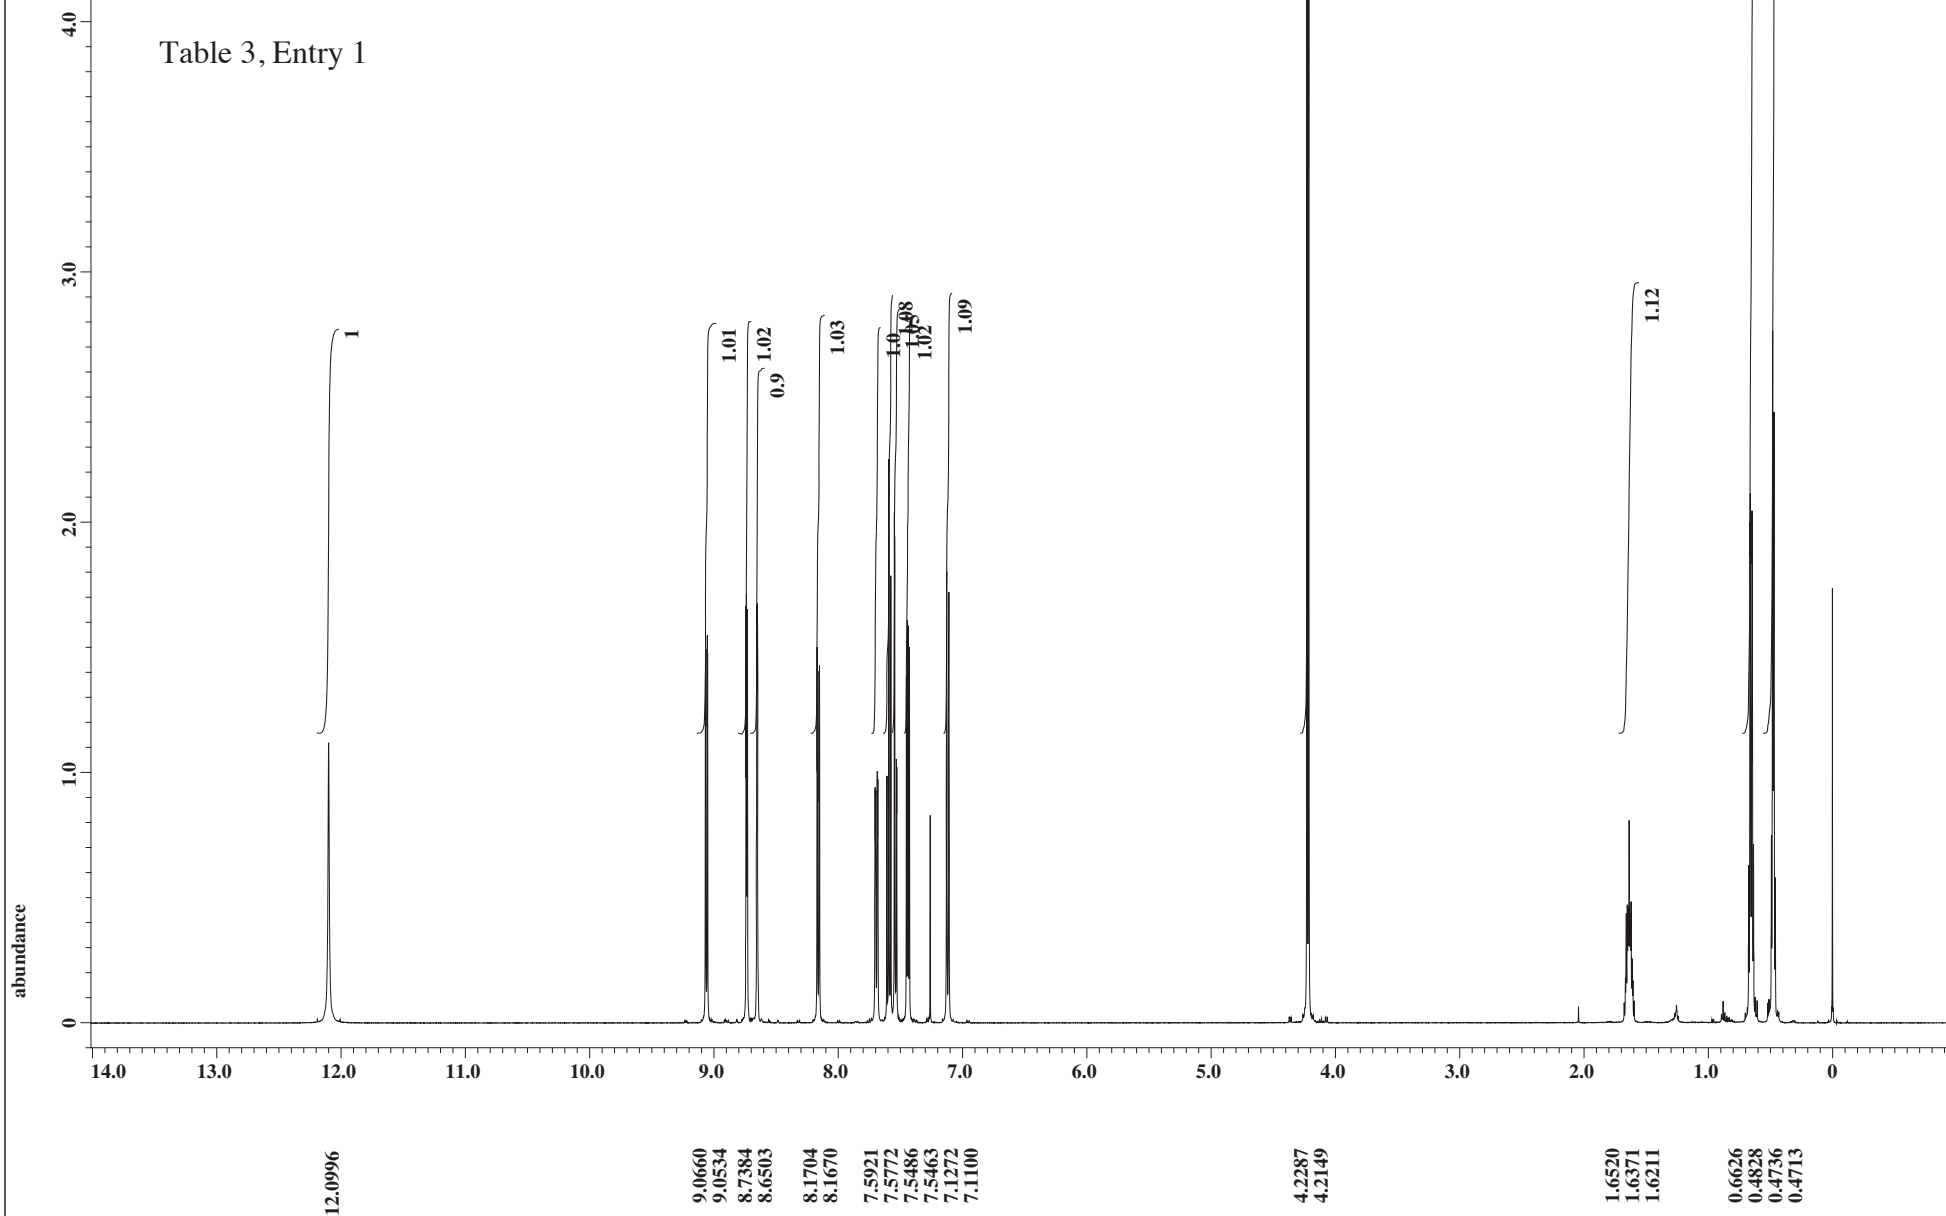

X : parts per Million : 1H

S64



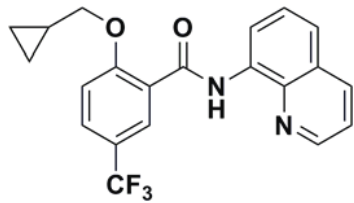

Table 3, Entry 1

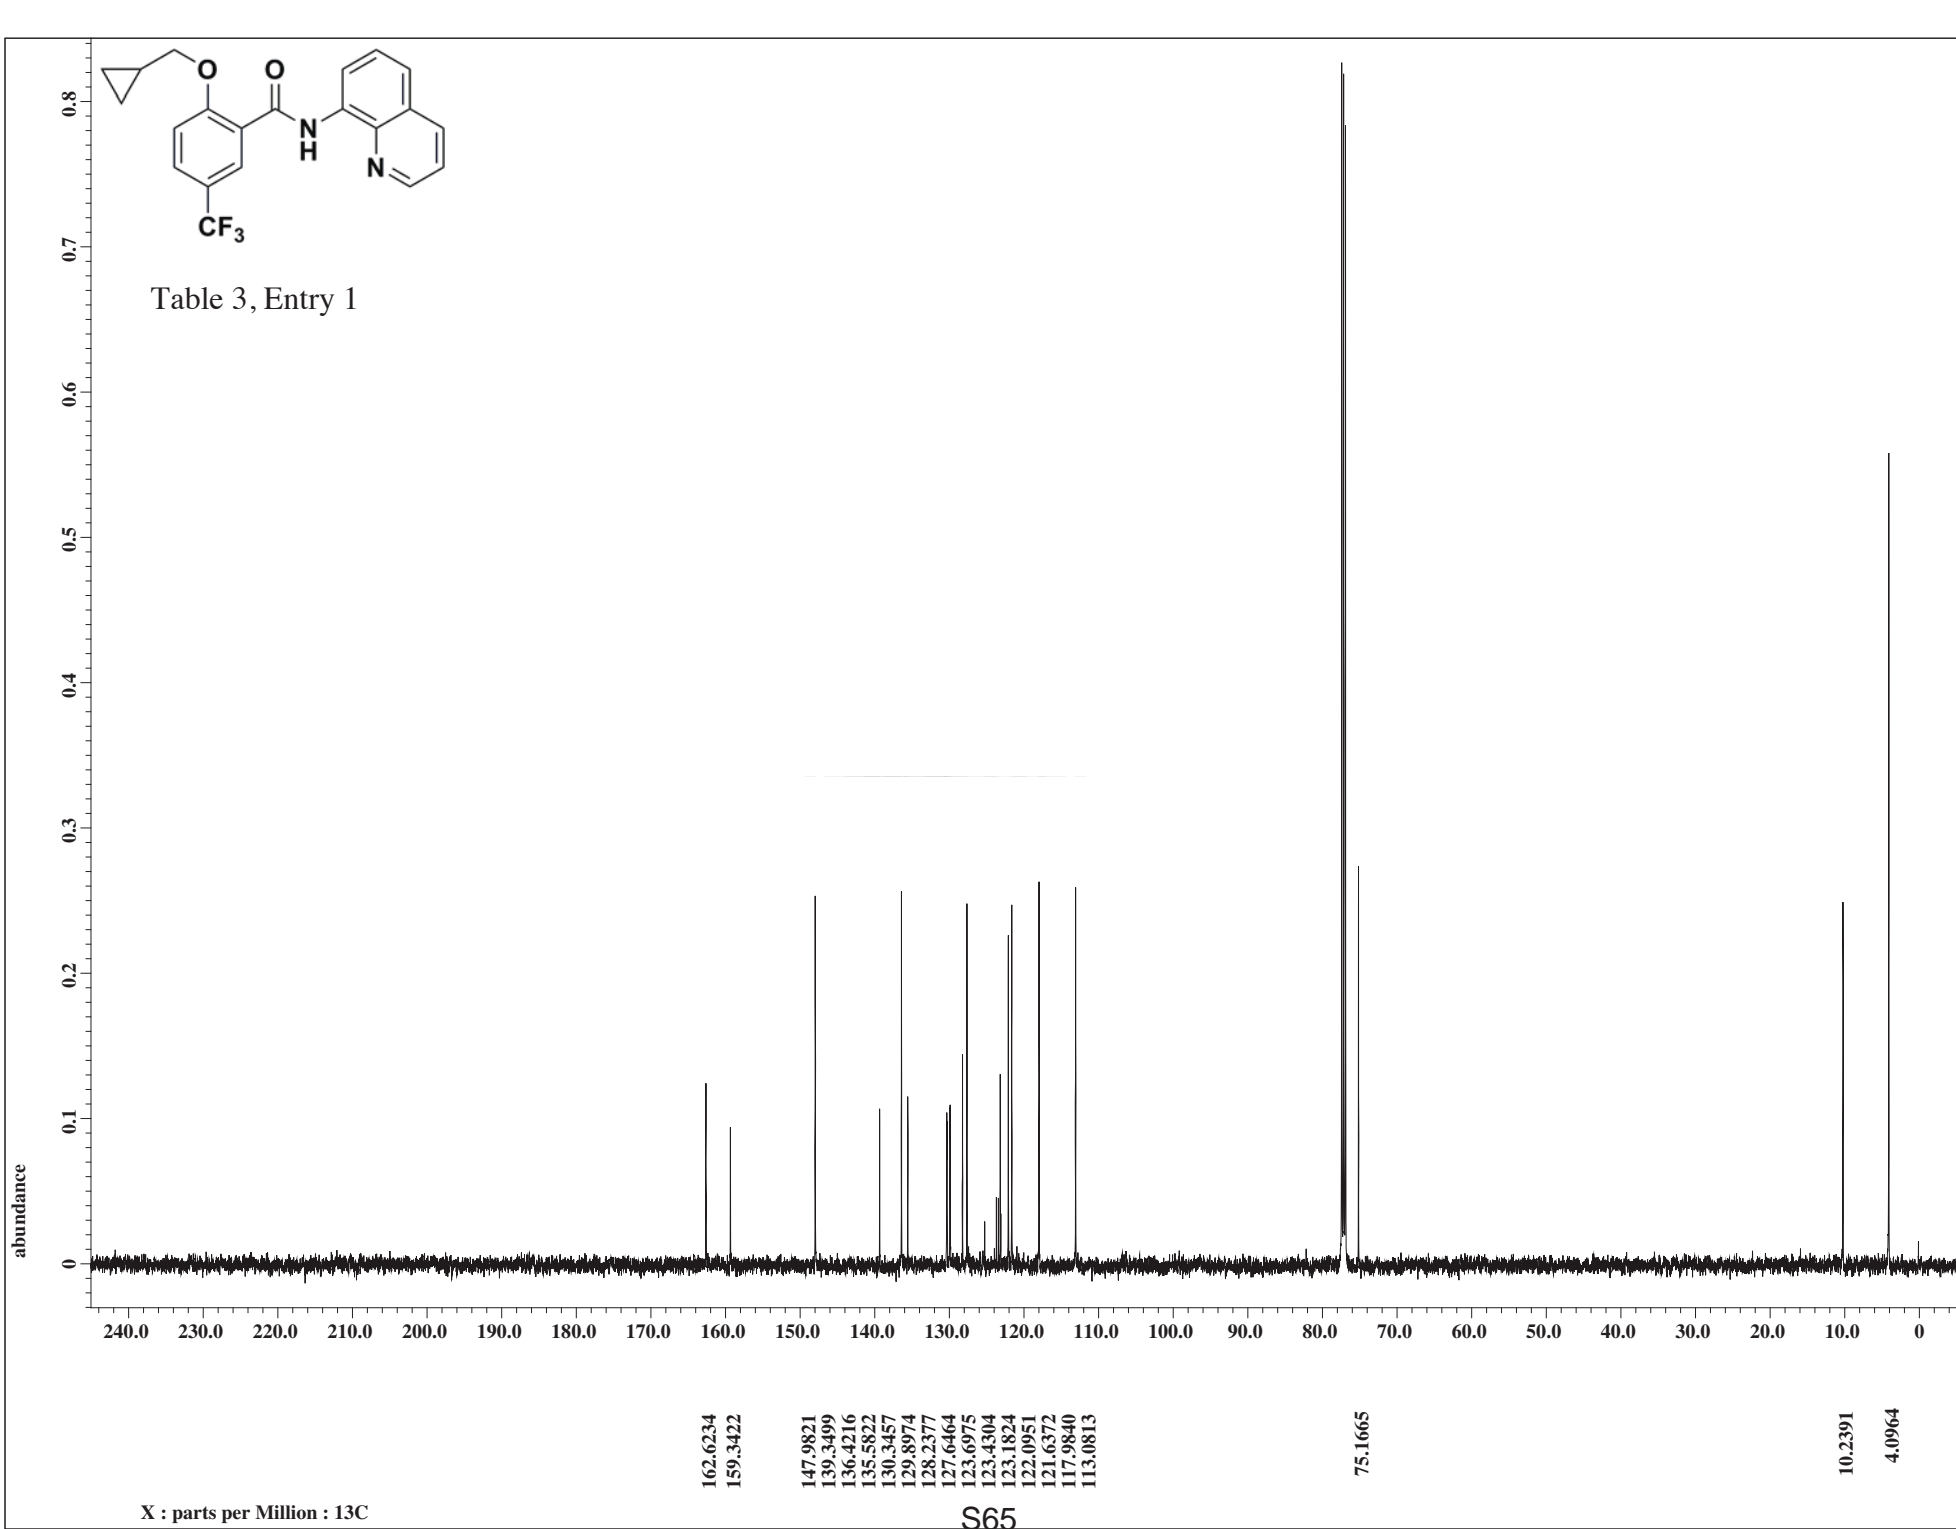



Table 3, Entry 1

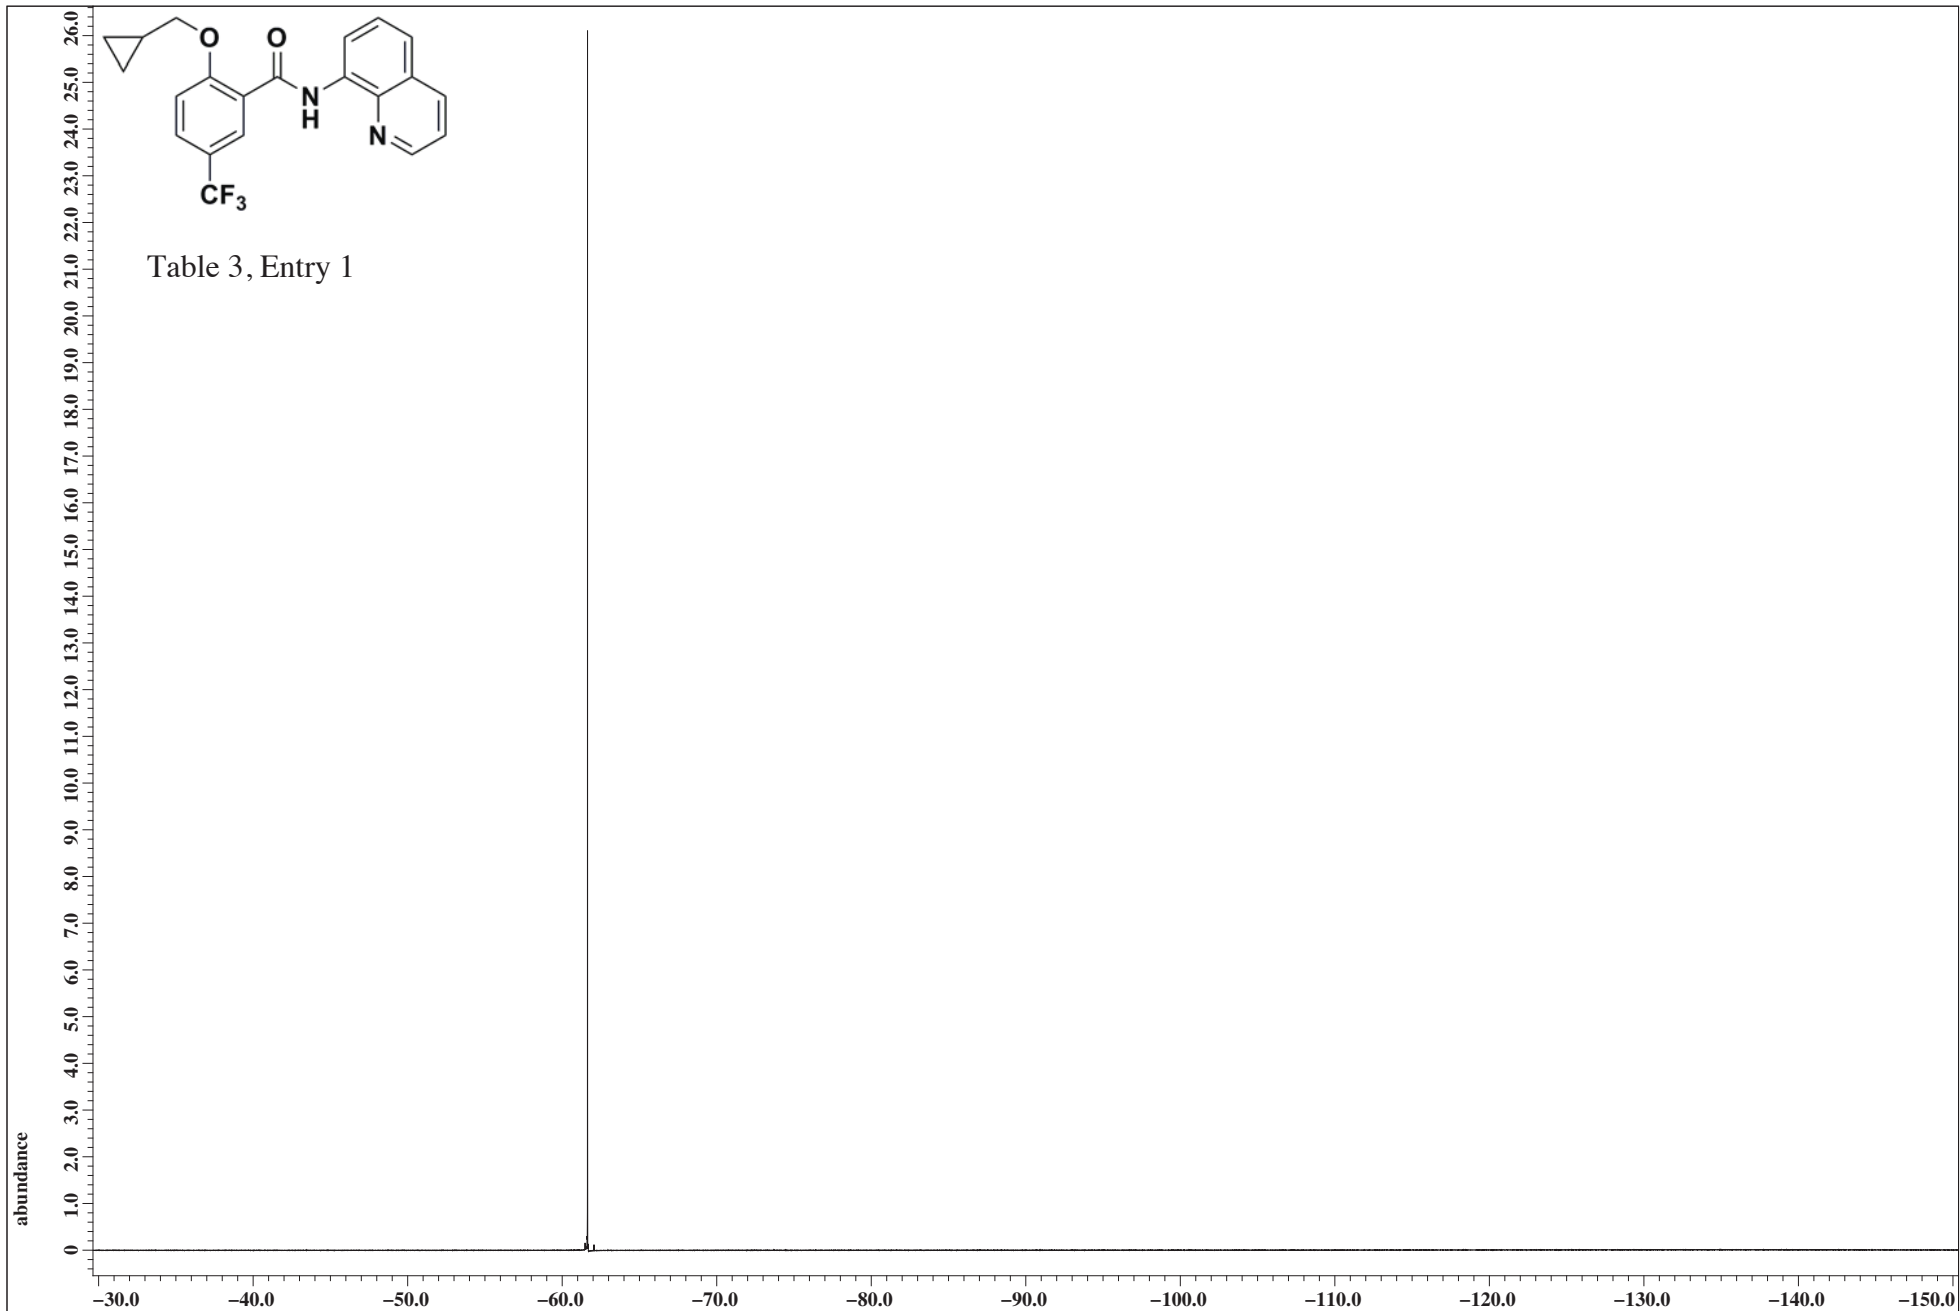

-61.6393

X : parts per Million : 19F

S66

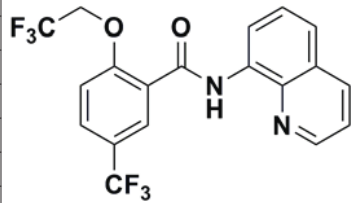

Table 3, Entry 2

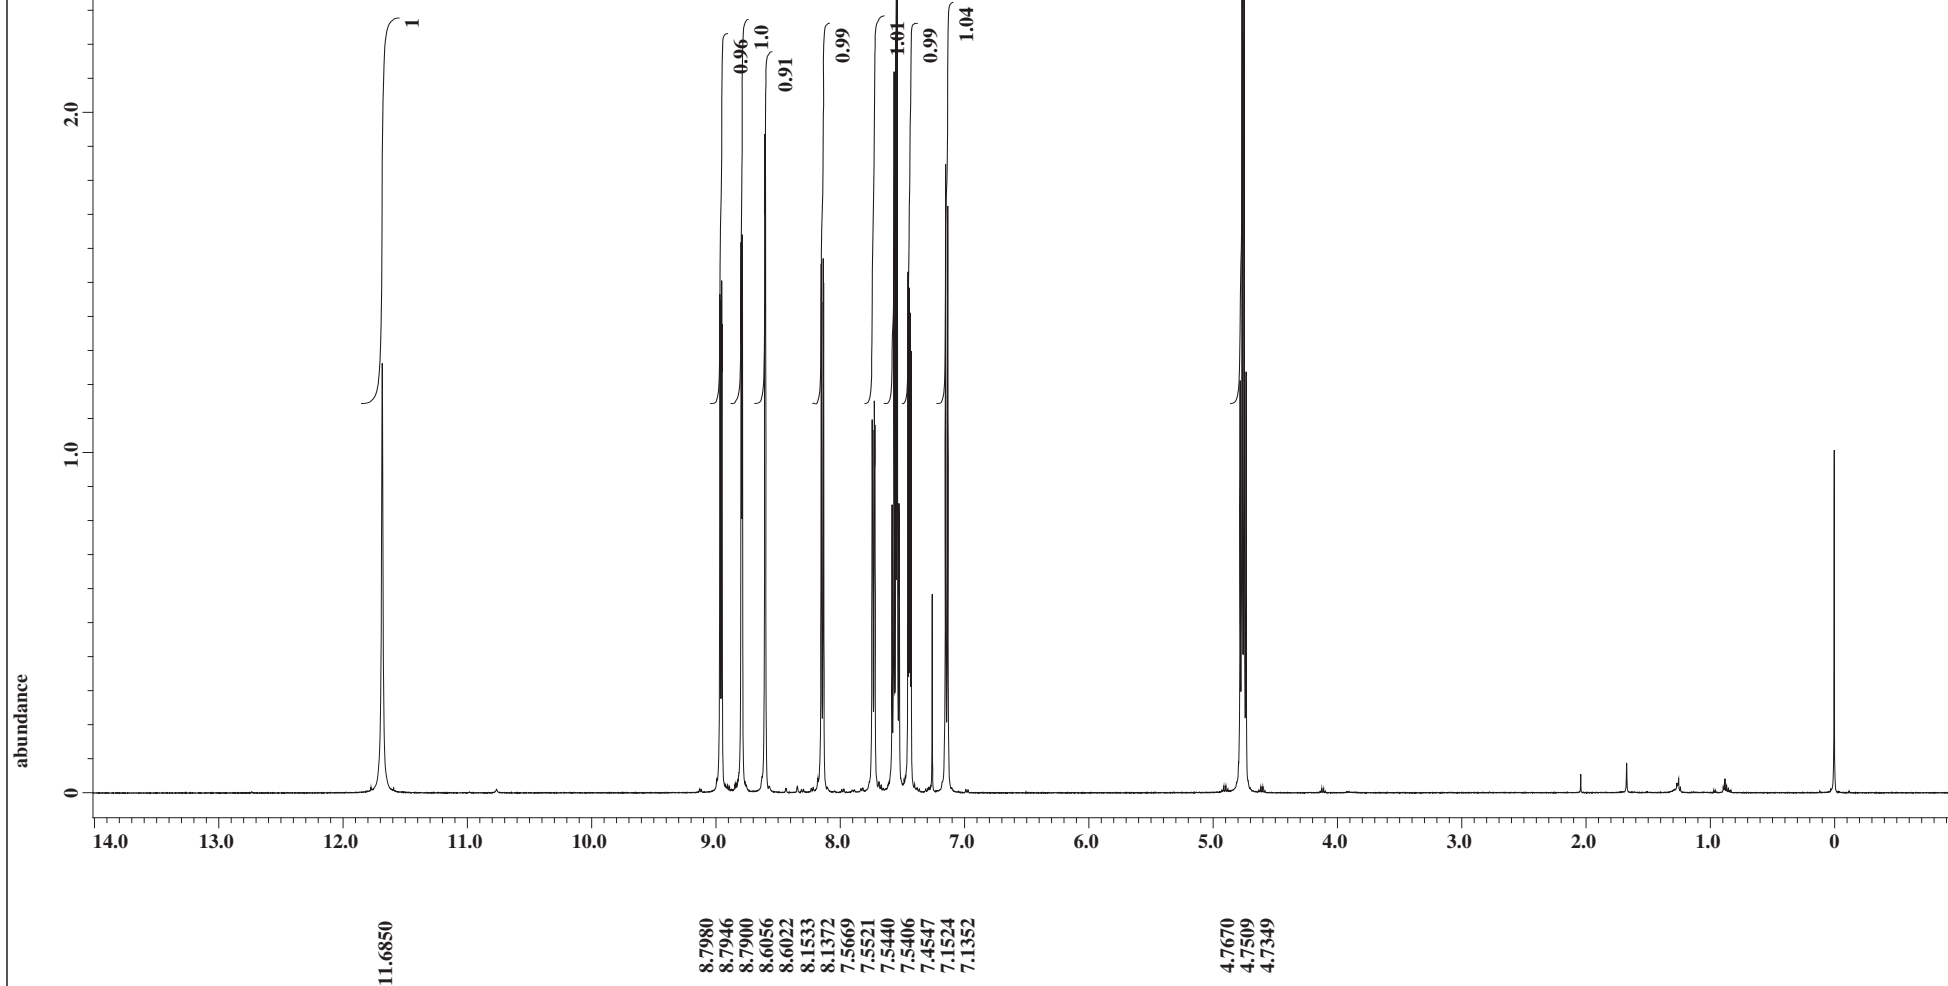

X : parts per Million : 1H

S67

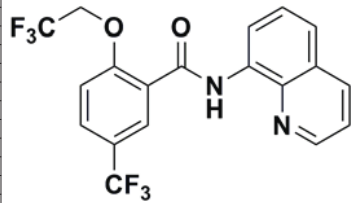

Table 3, Entry 2

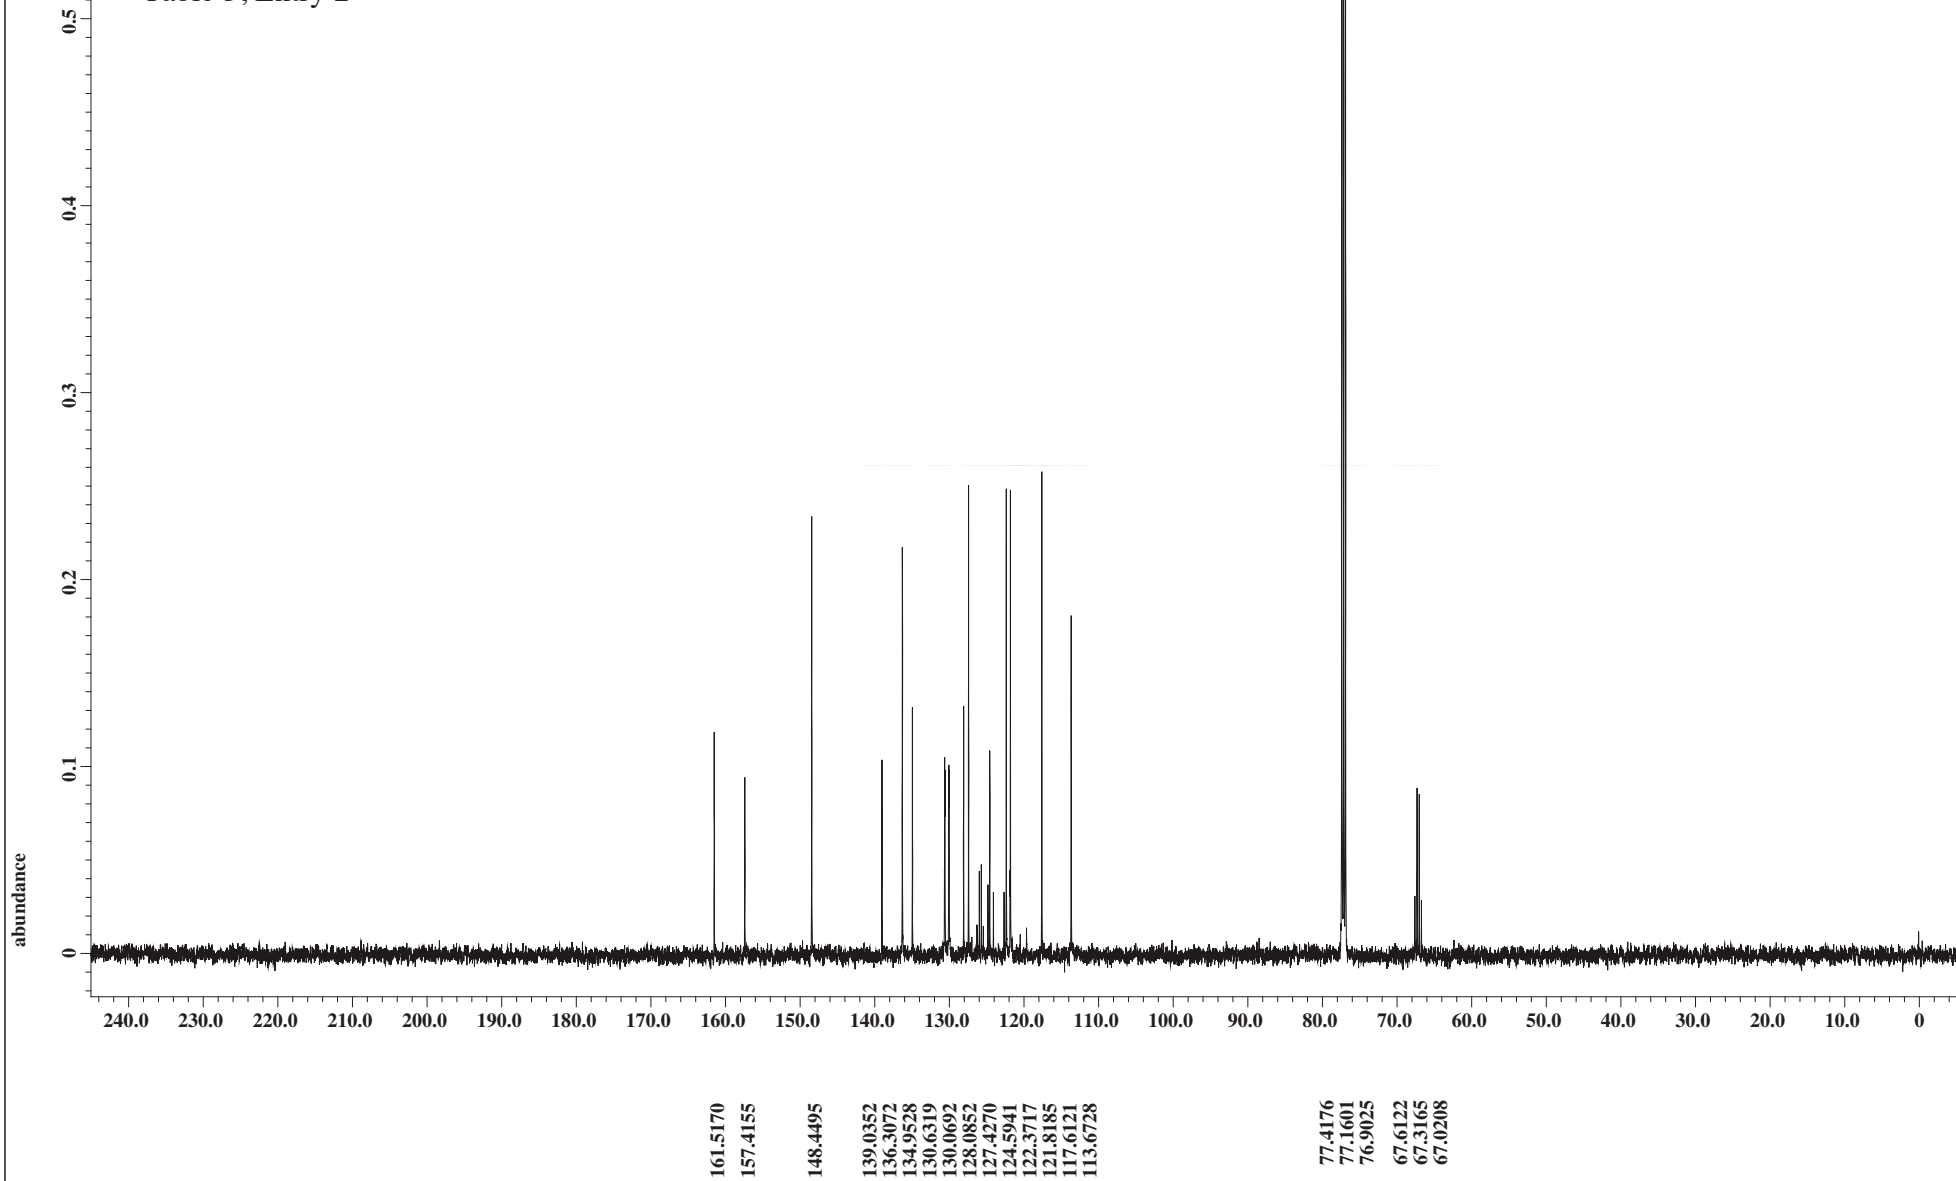

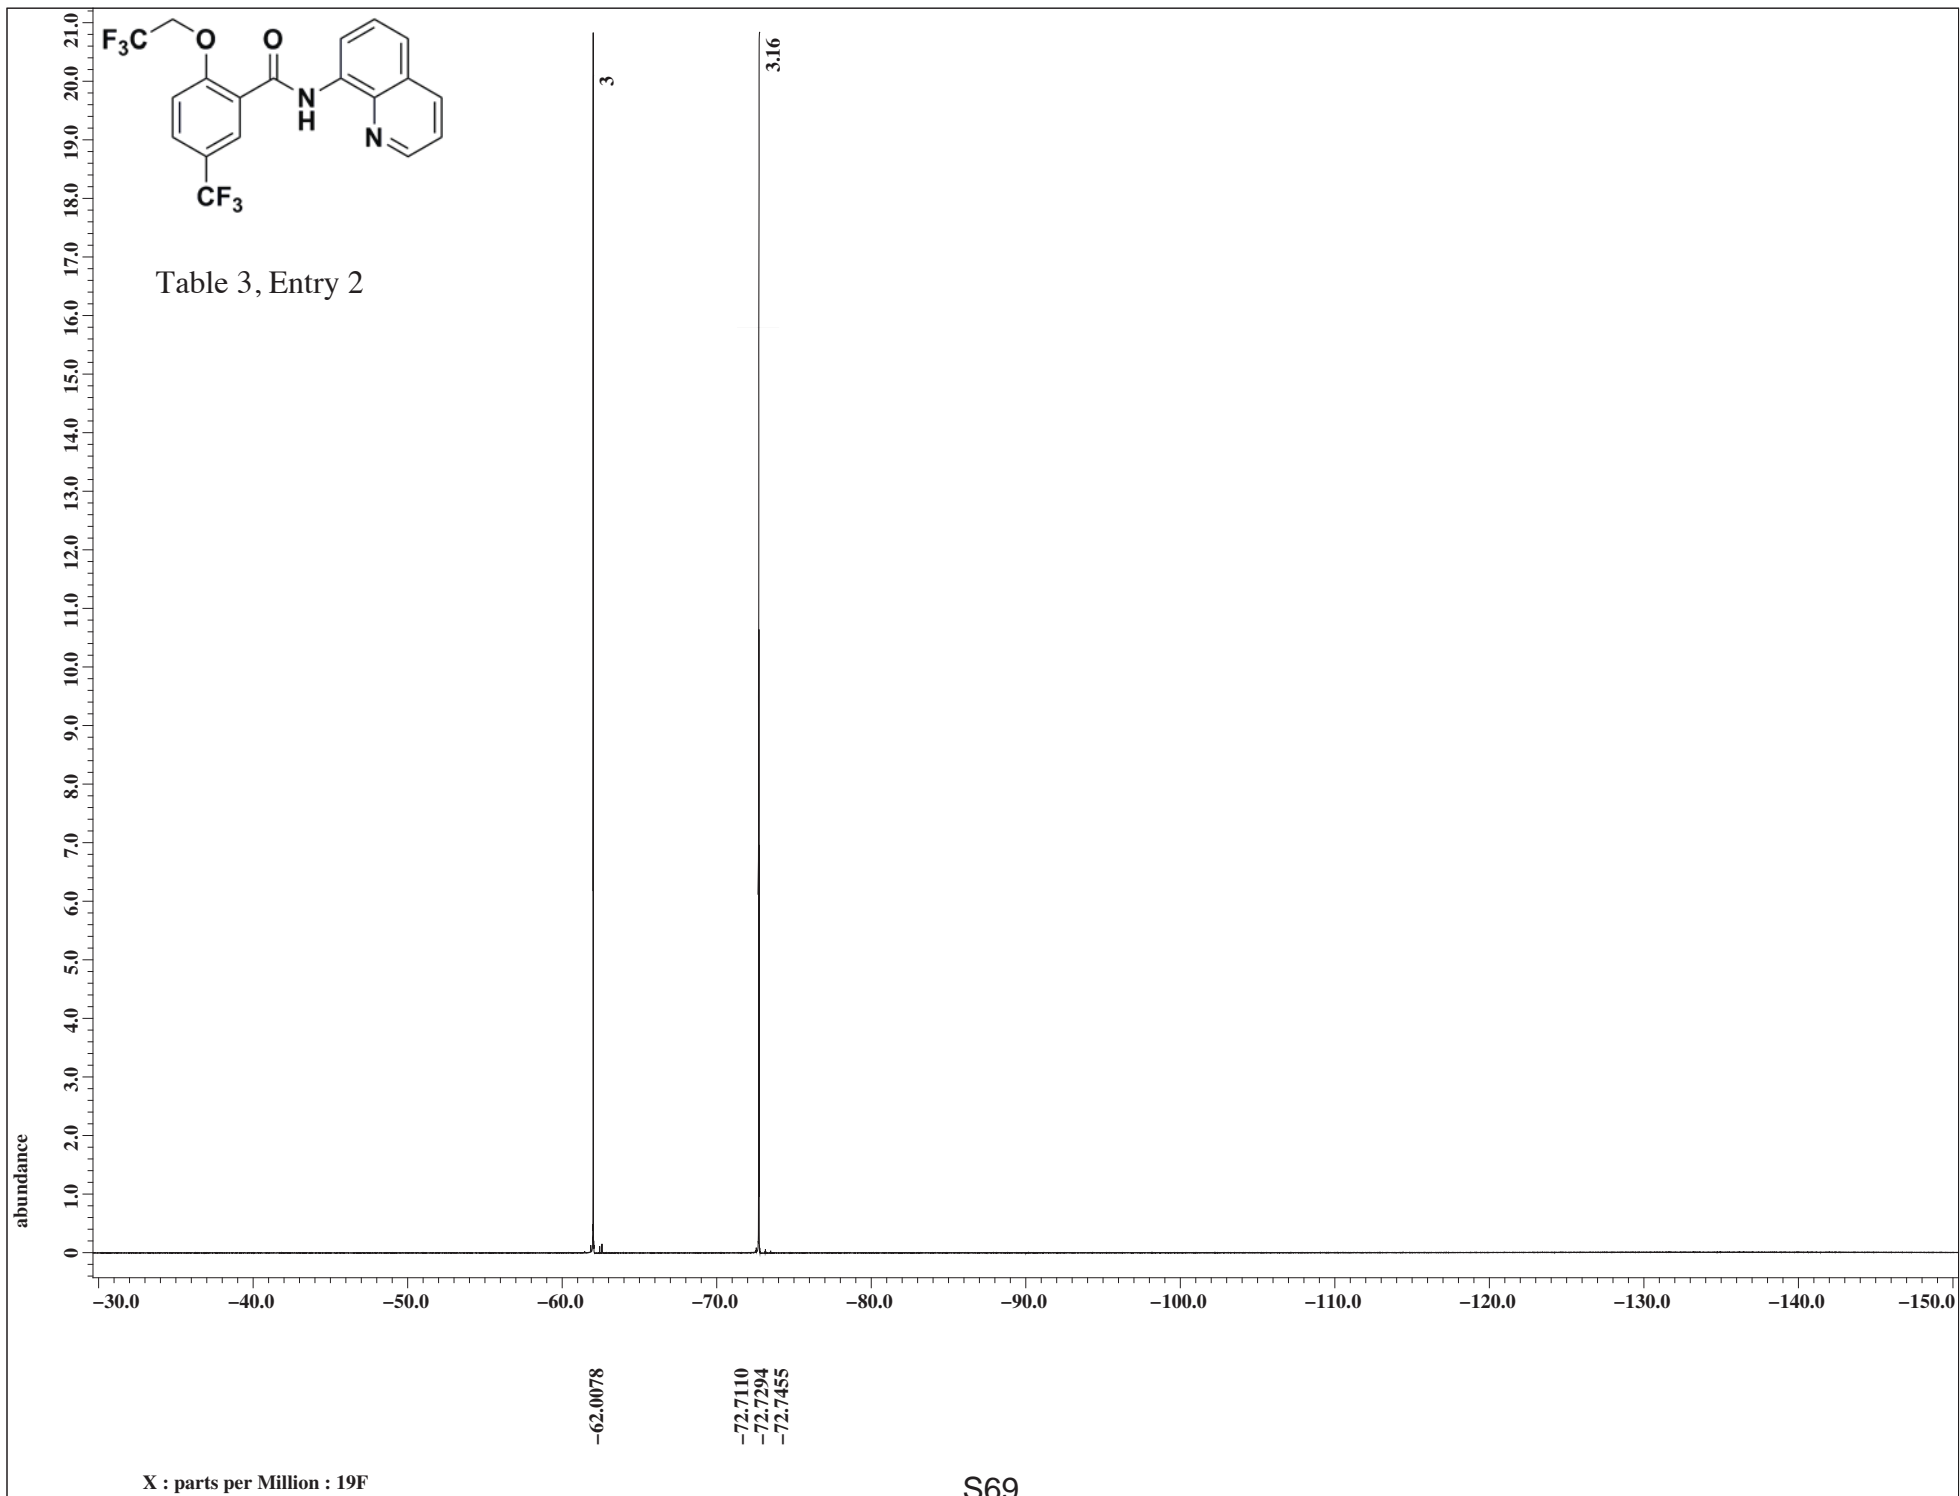

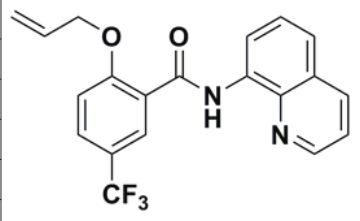

Table 3, Entry 3

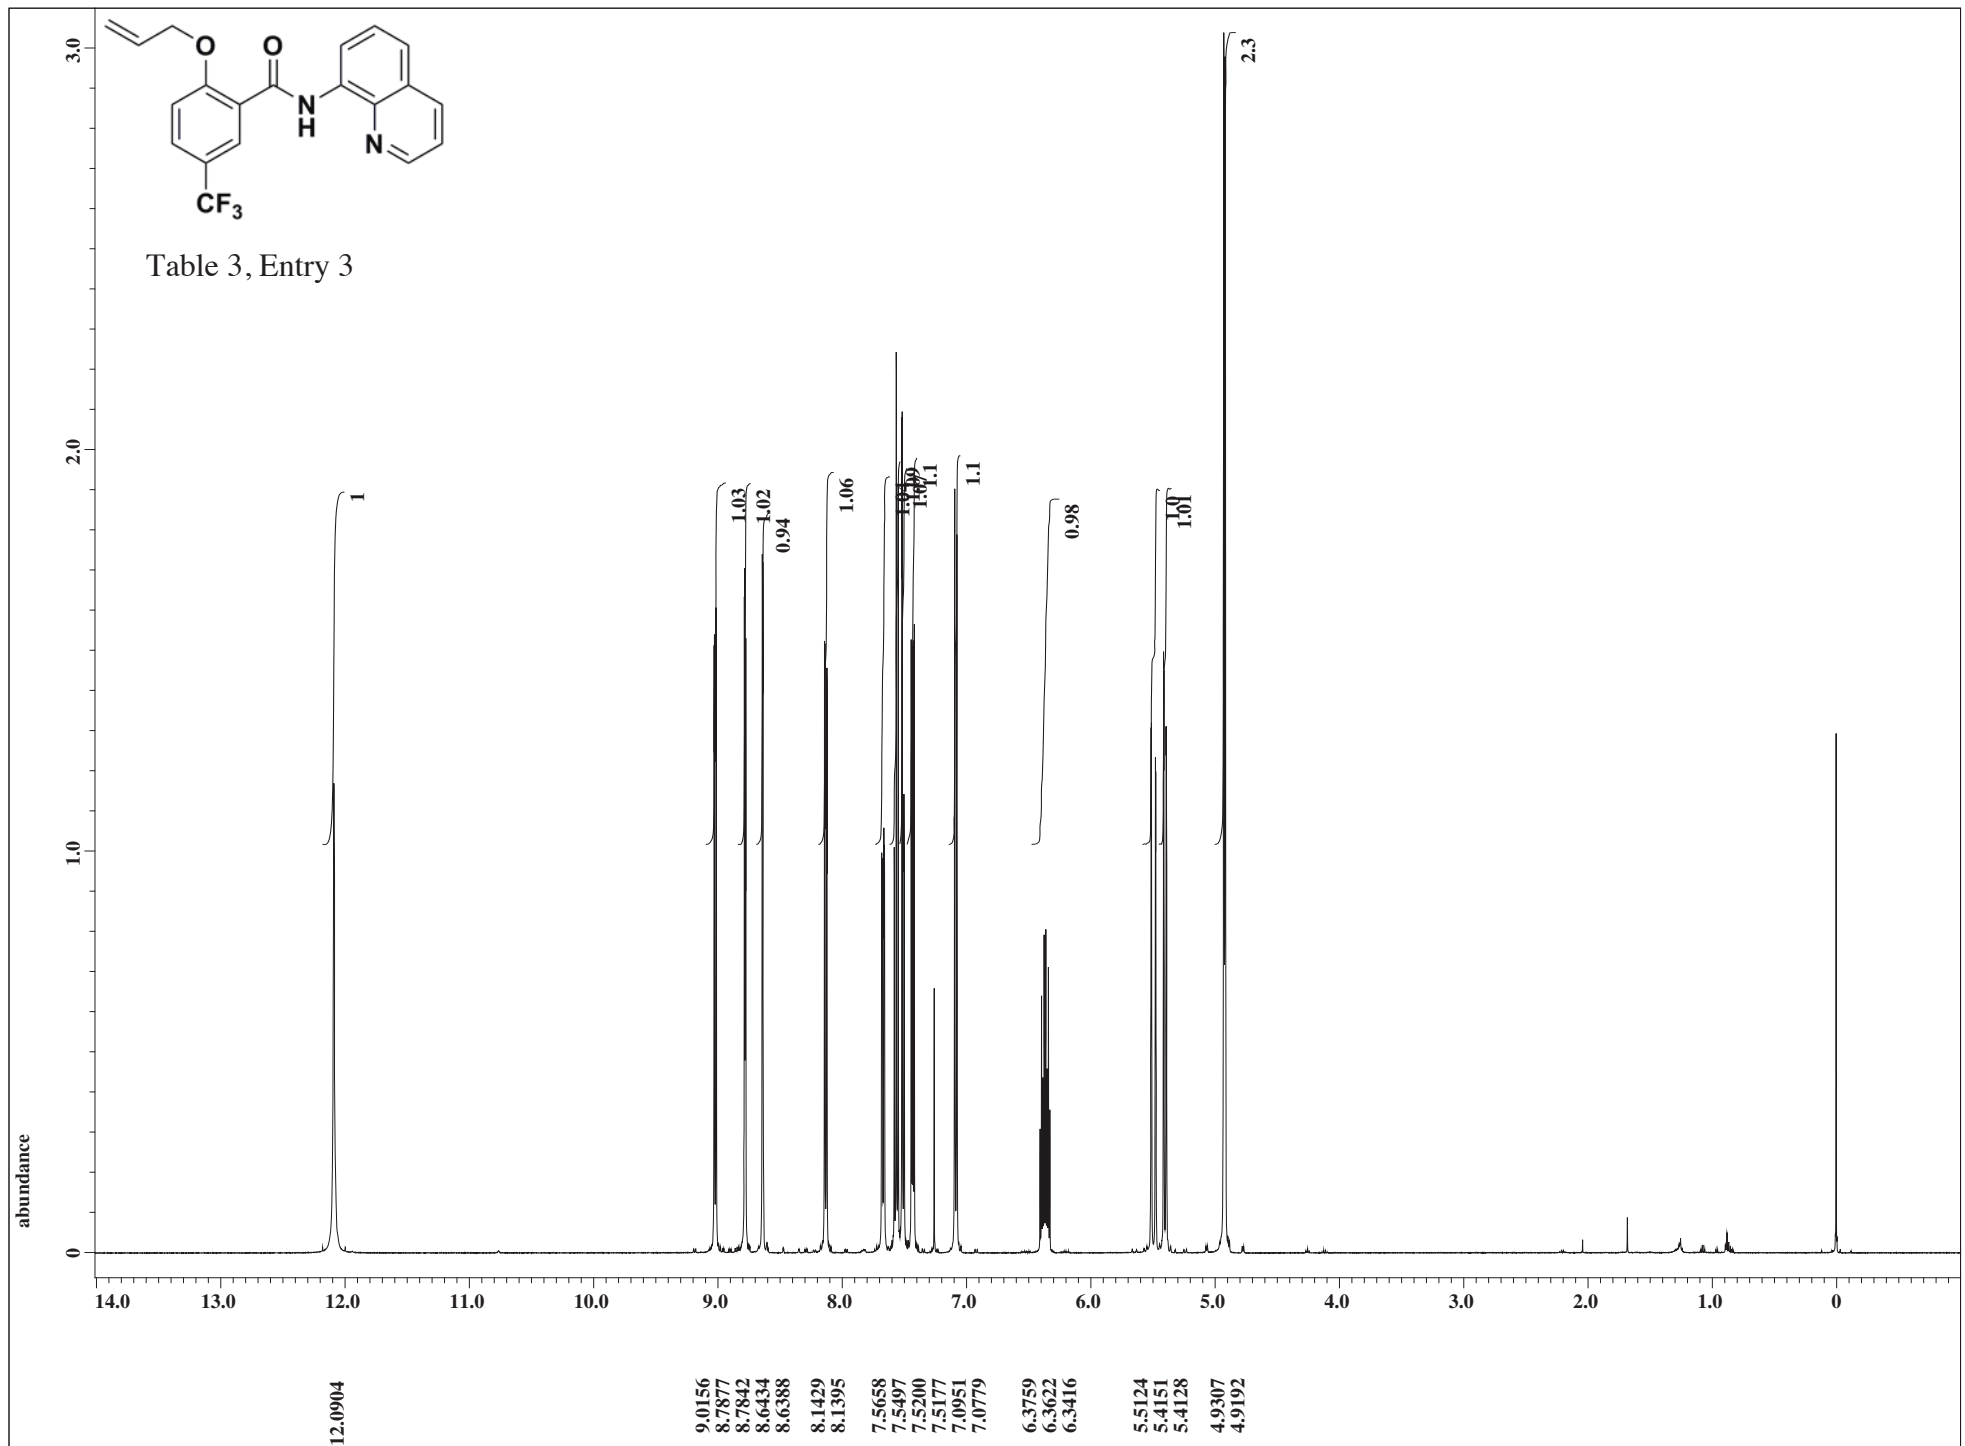

X : parts per Million : 1H

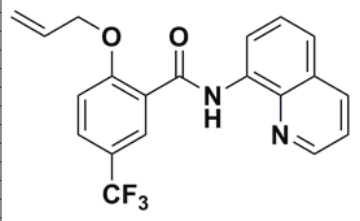

Table 3, Entry 3

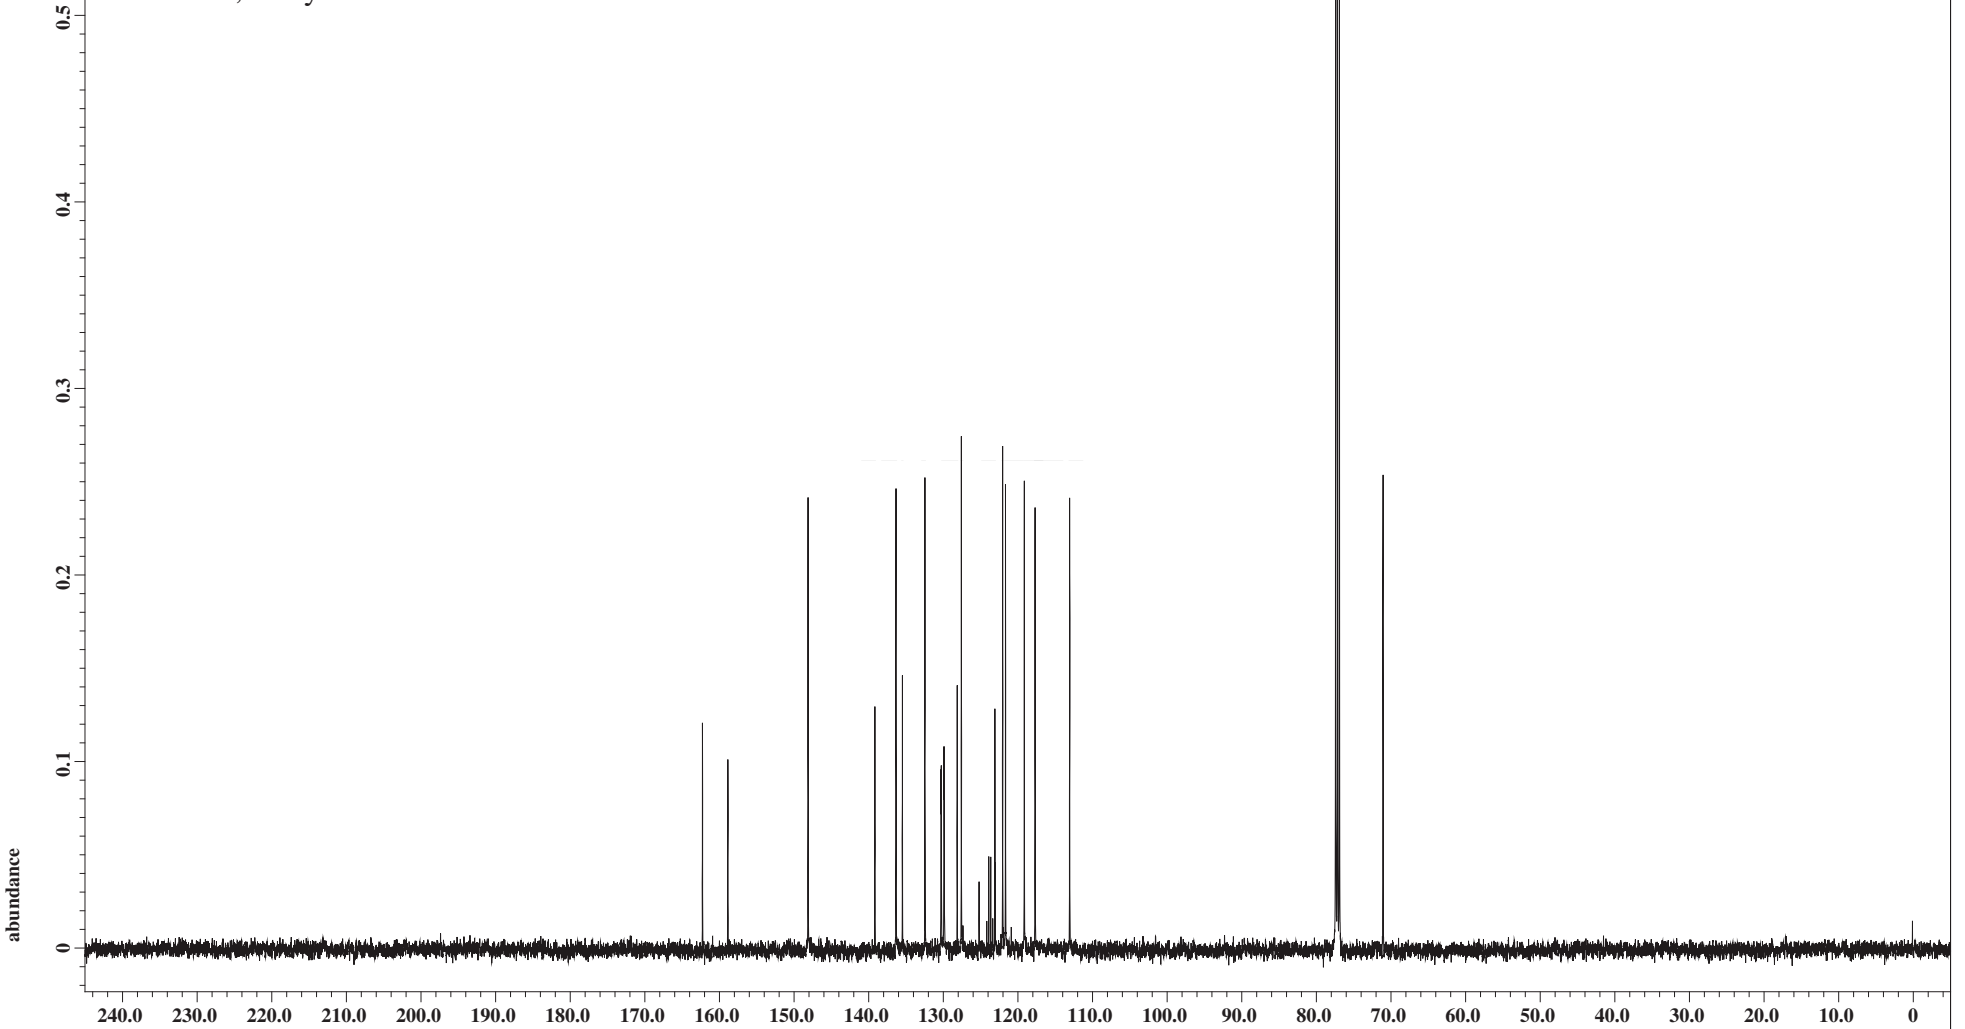

- 162.2800
- 158.8748
- 148.1251
- 139.1686
- 136.3358
- 135.4773
- 132.4632
- 128.1328
- 127.5796
- 123.0870
- 122.0473
- 121.6658
- 119.1382
- 117.6979
- 113.0718

71.0555

X : parts per Million : 13C

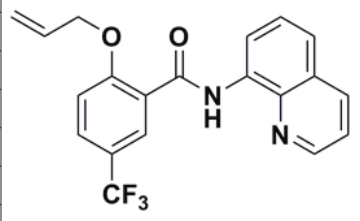

Table 3, Entry 3

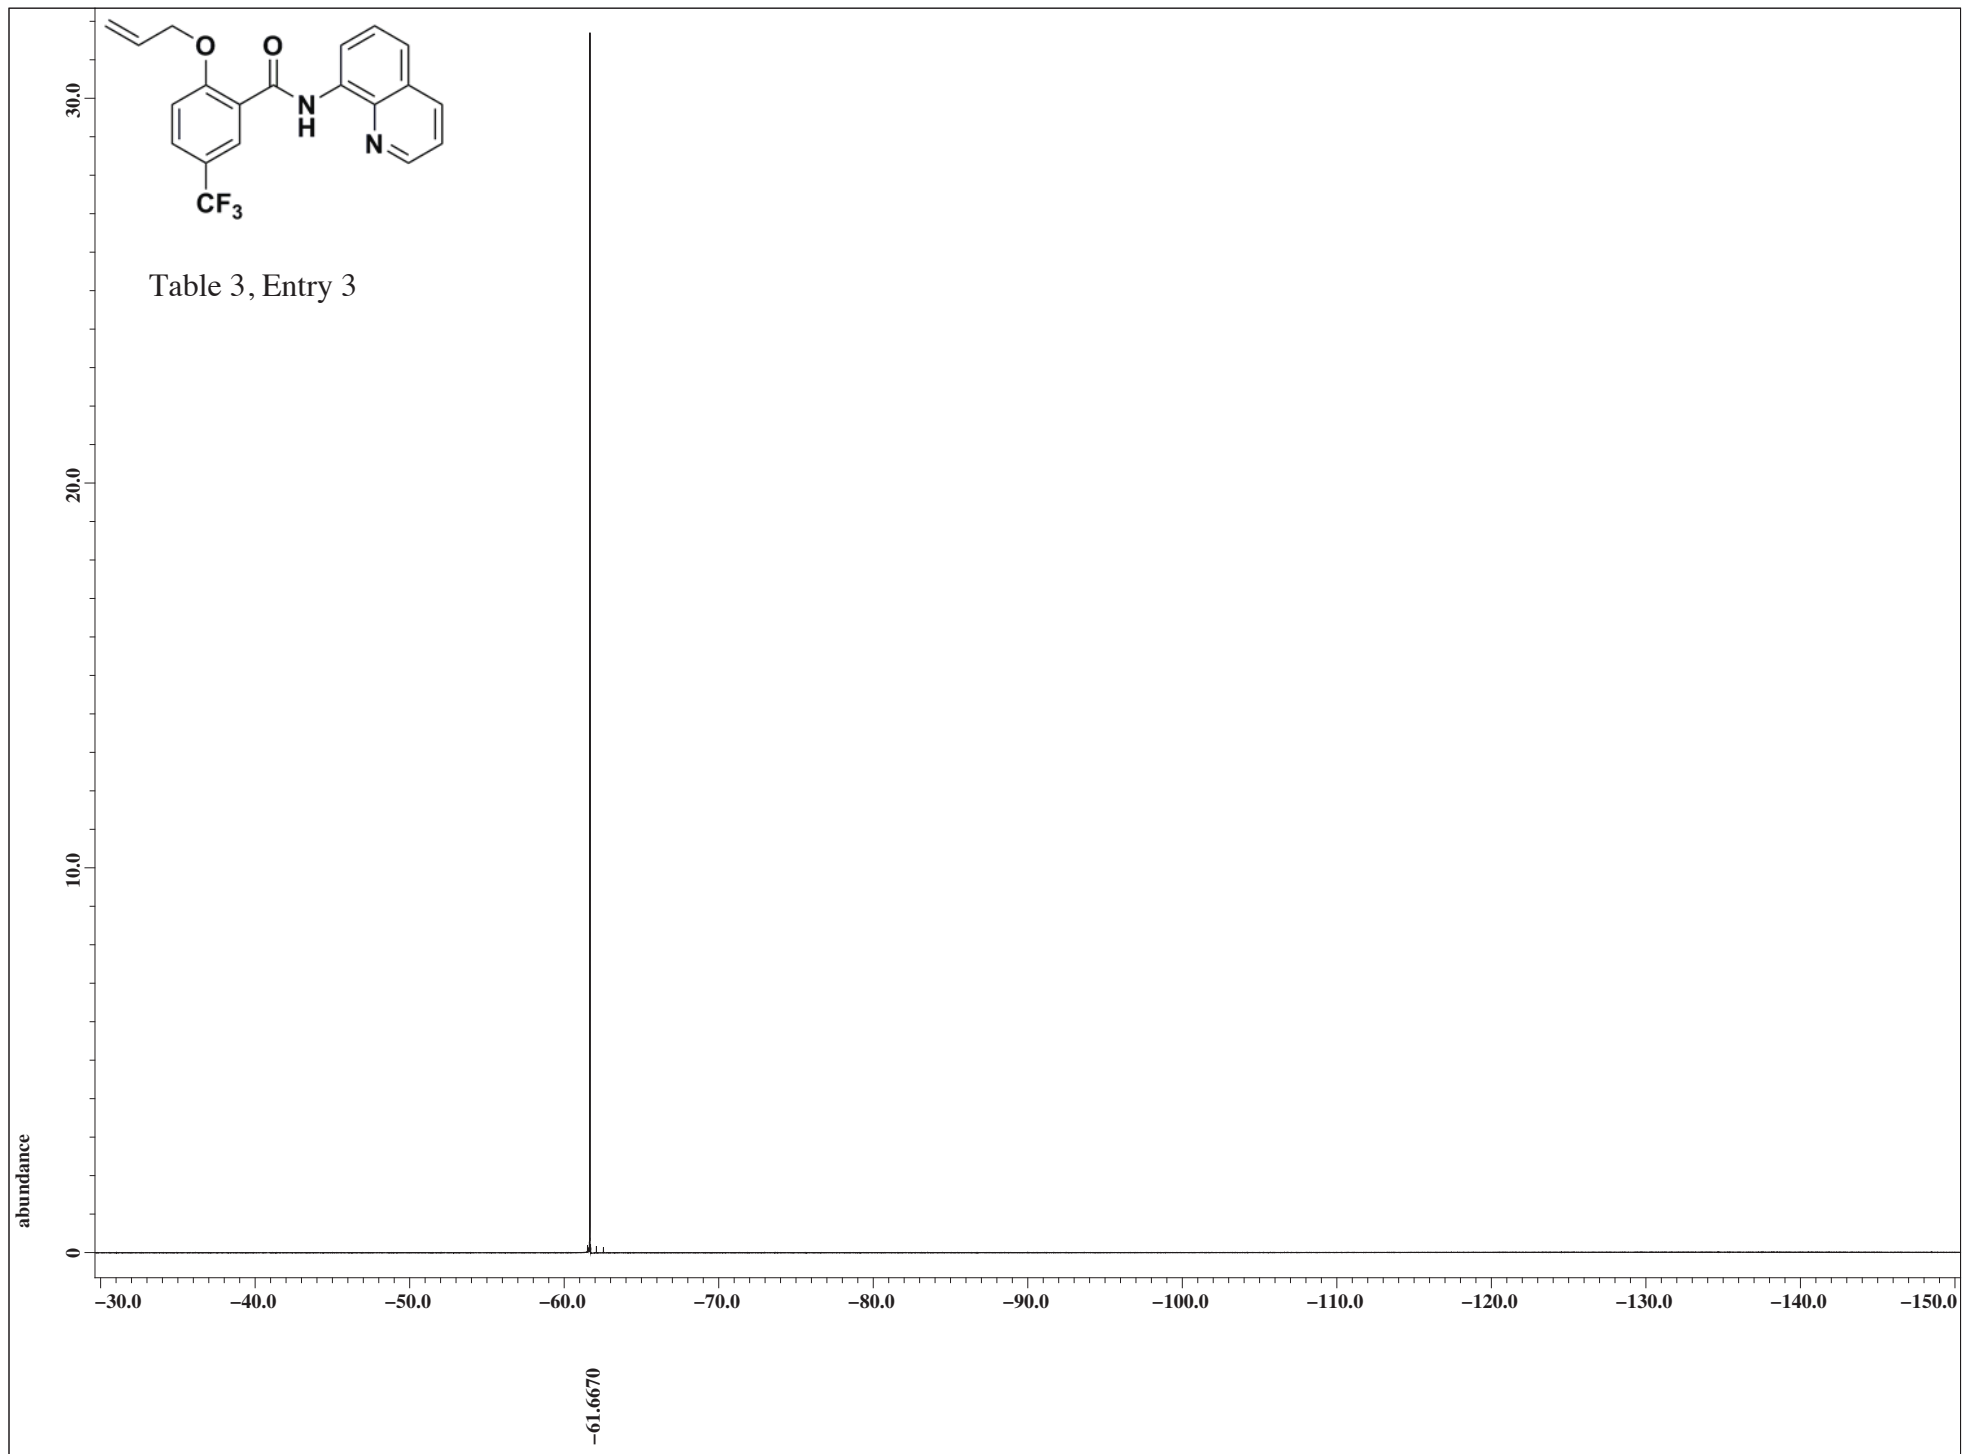

X : parts per Million : 19F



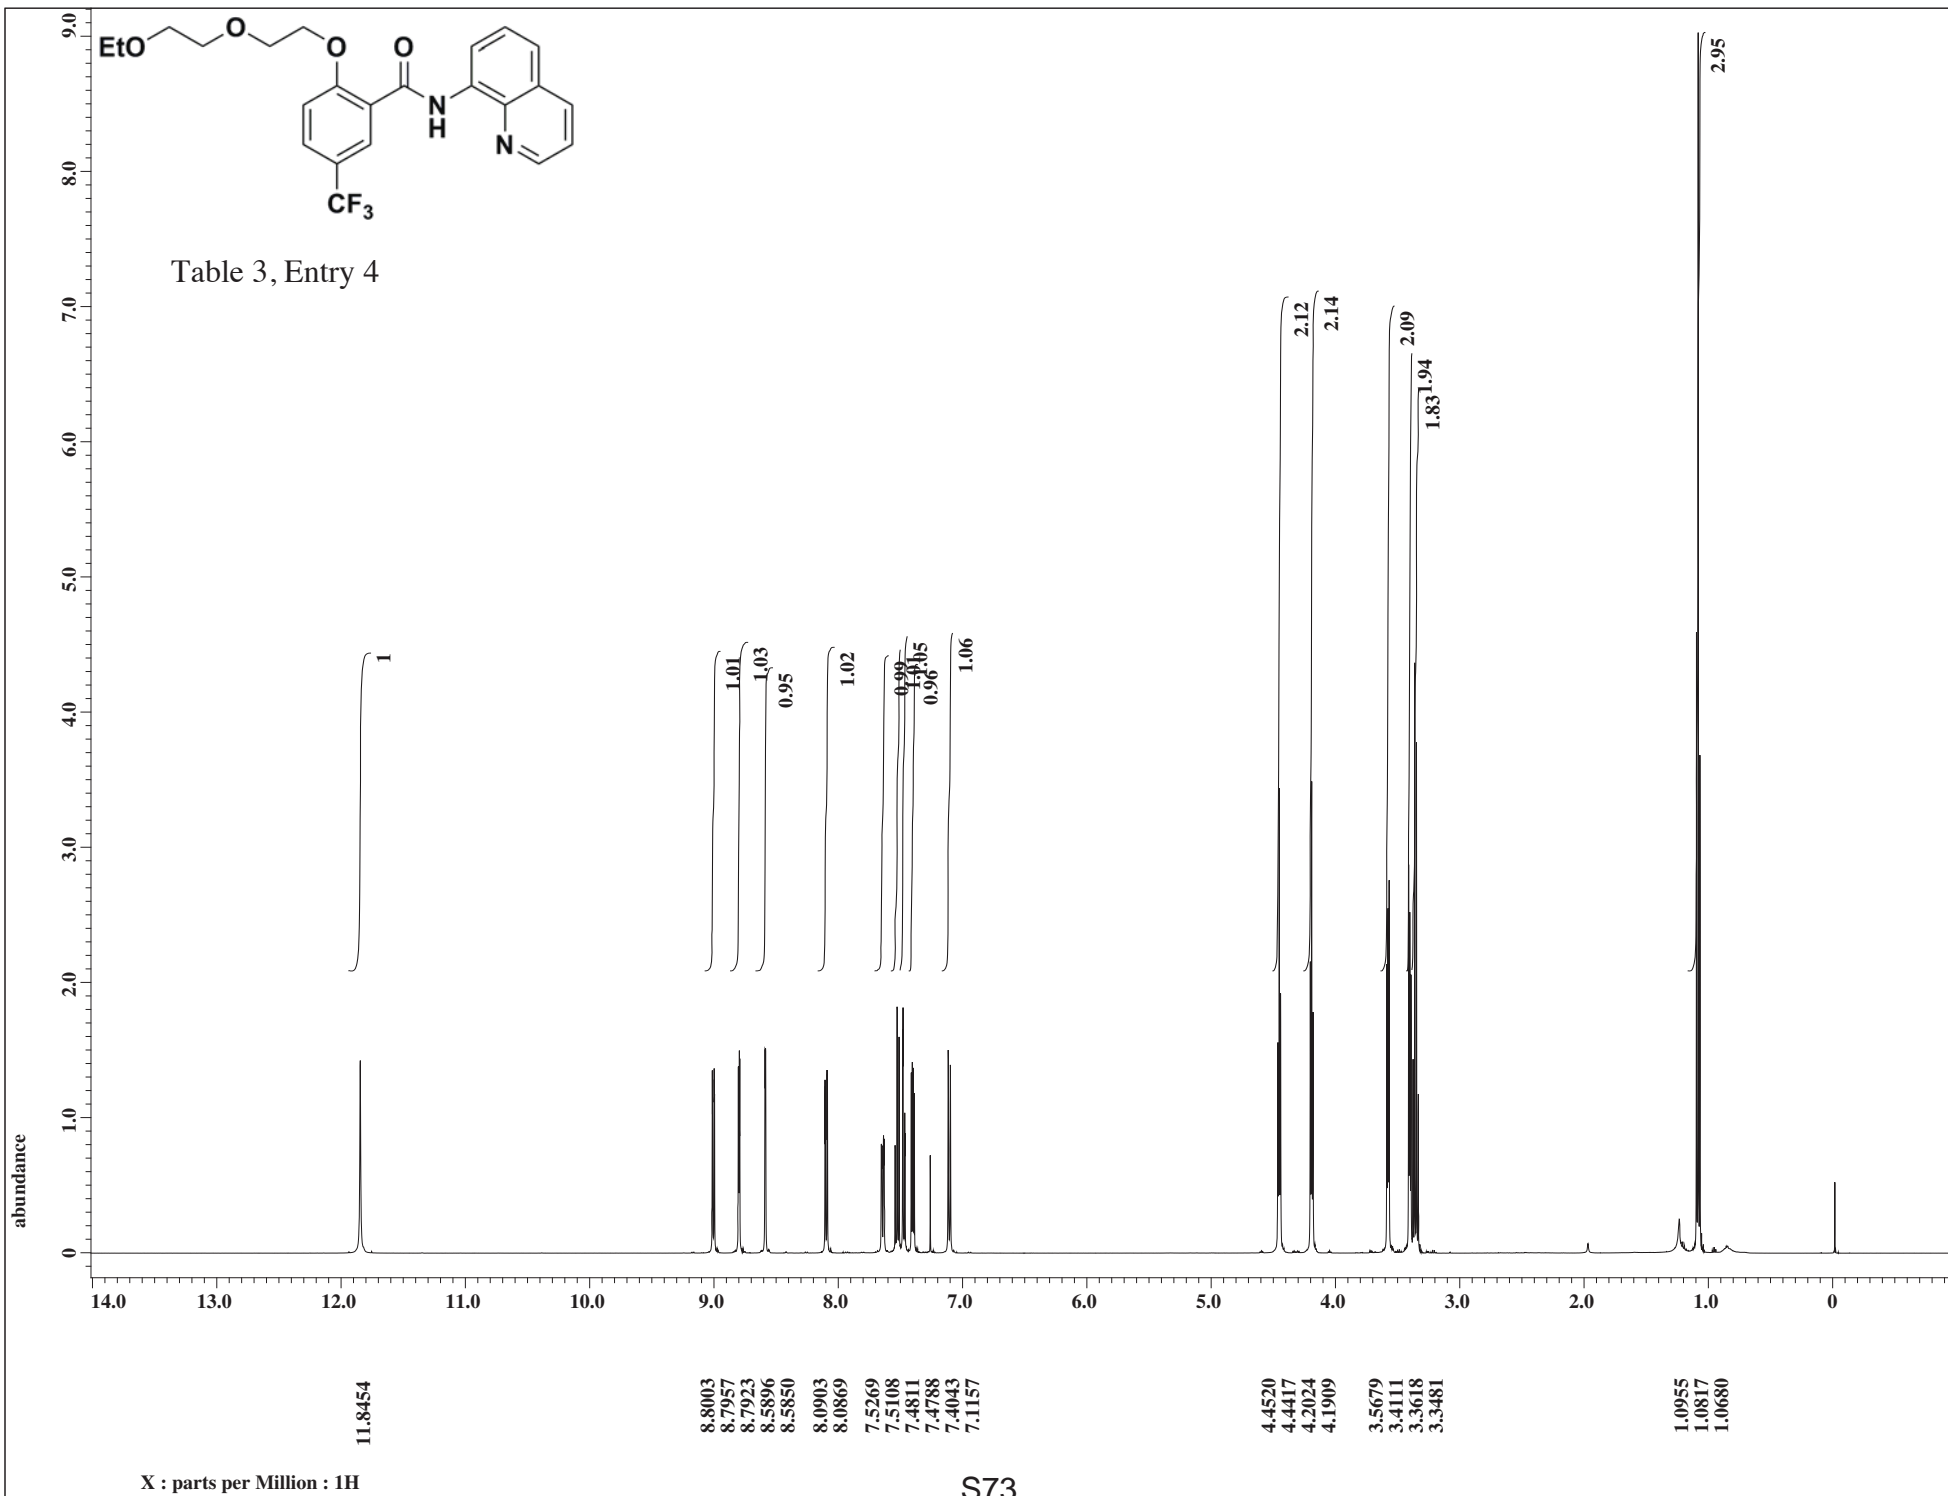

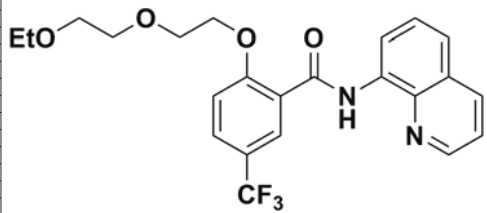

Table 3, Entry 4

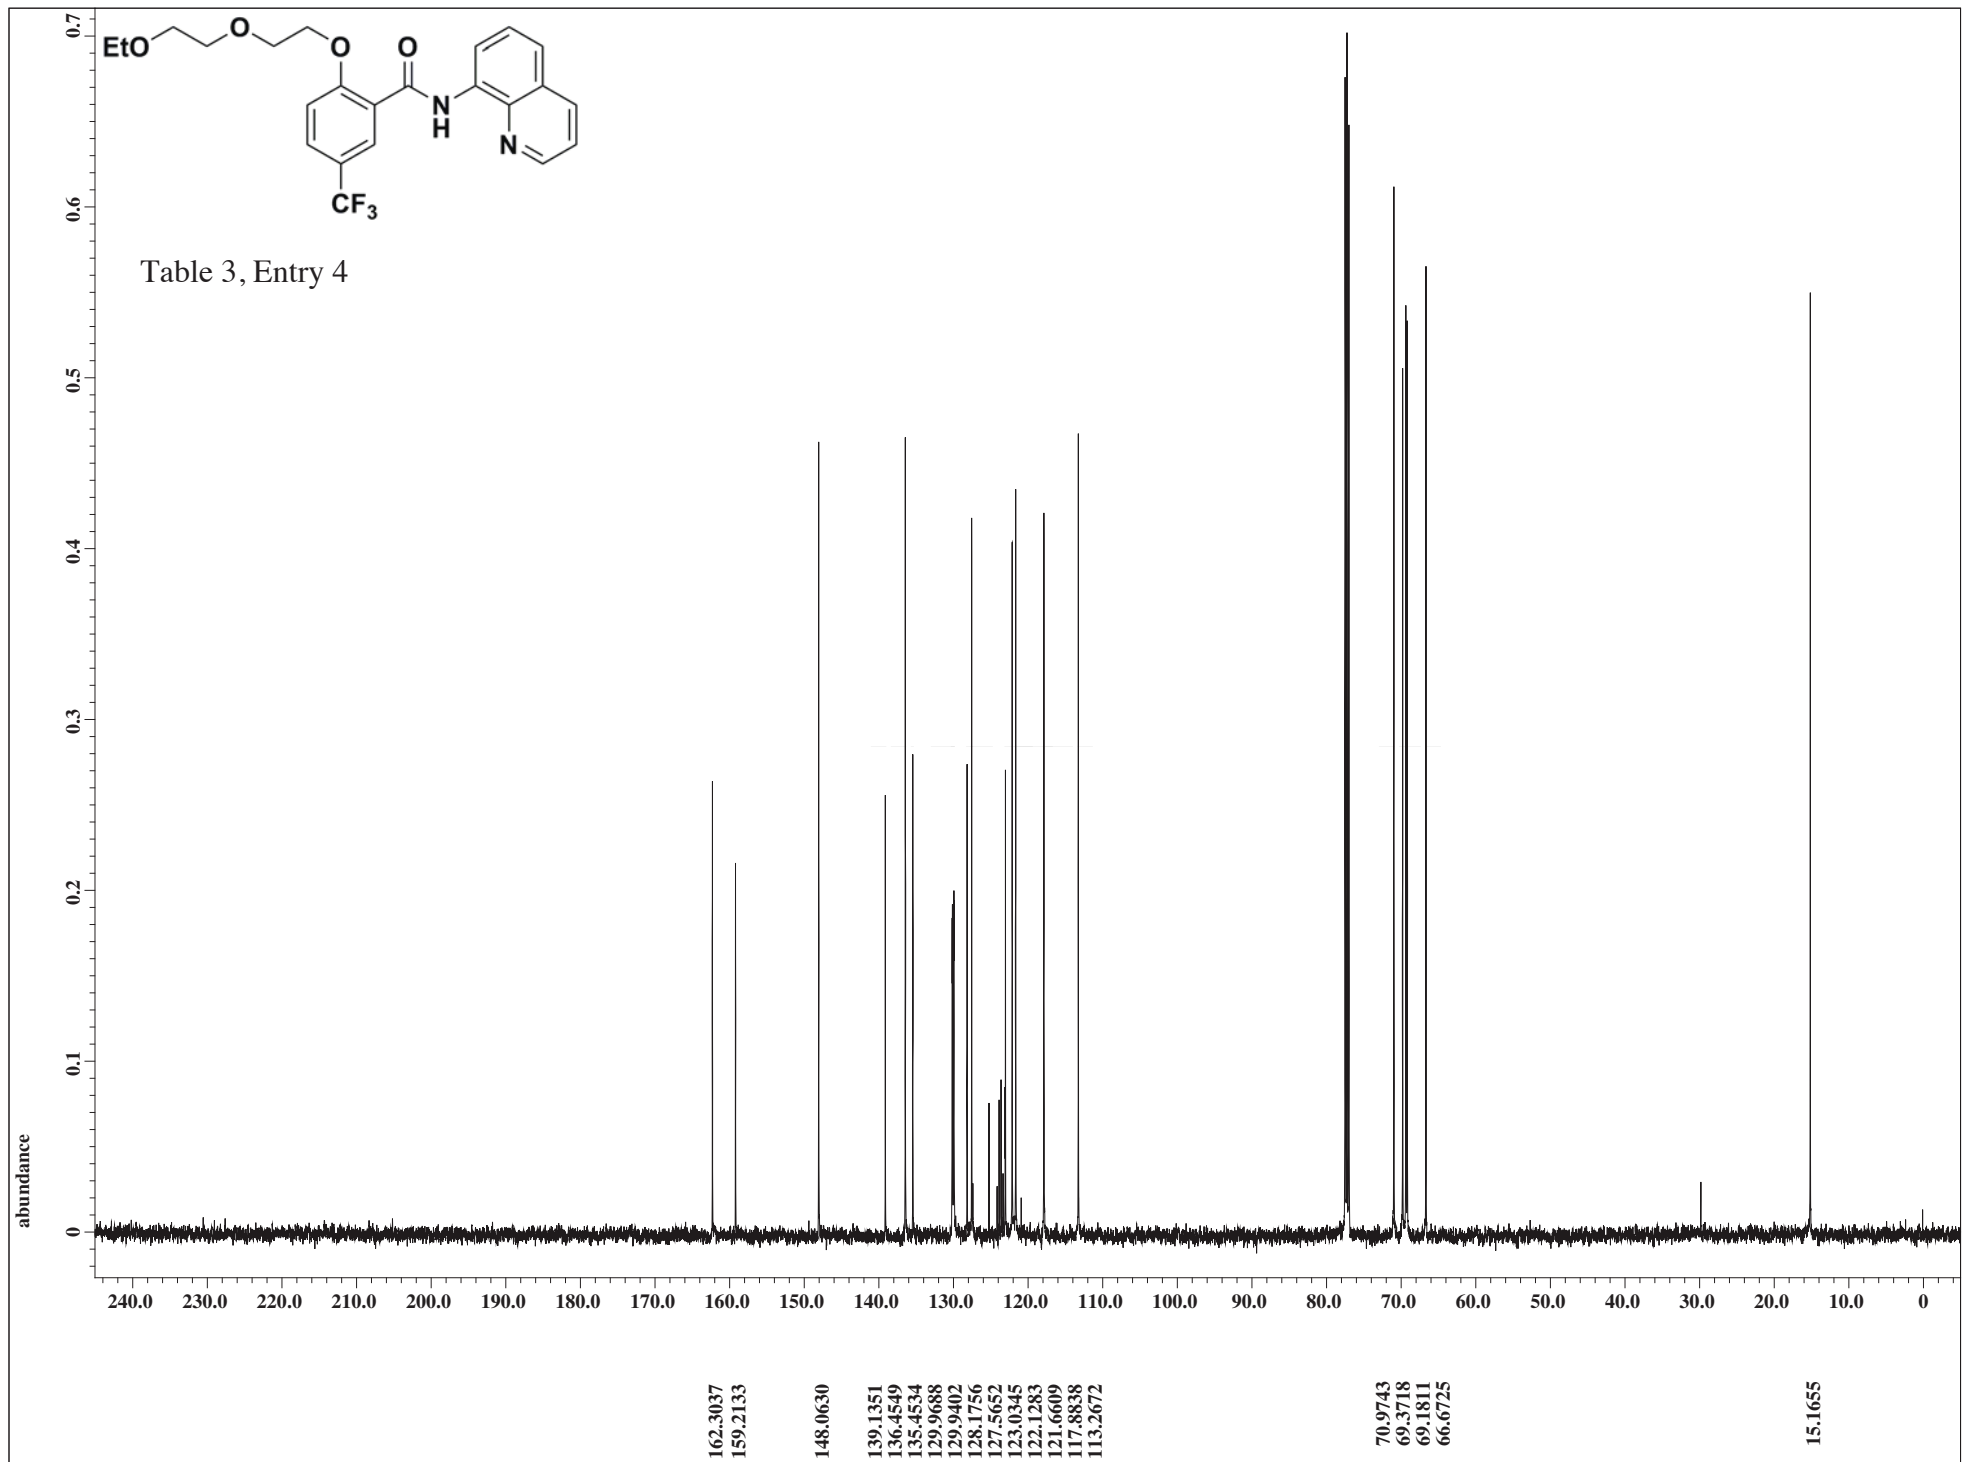

X : parts per Million : 13C

S74

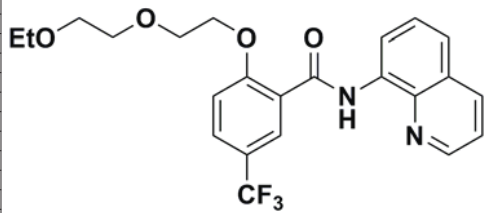

Table 3, Entry 4

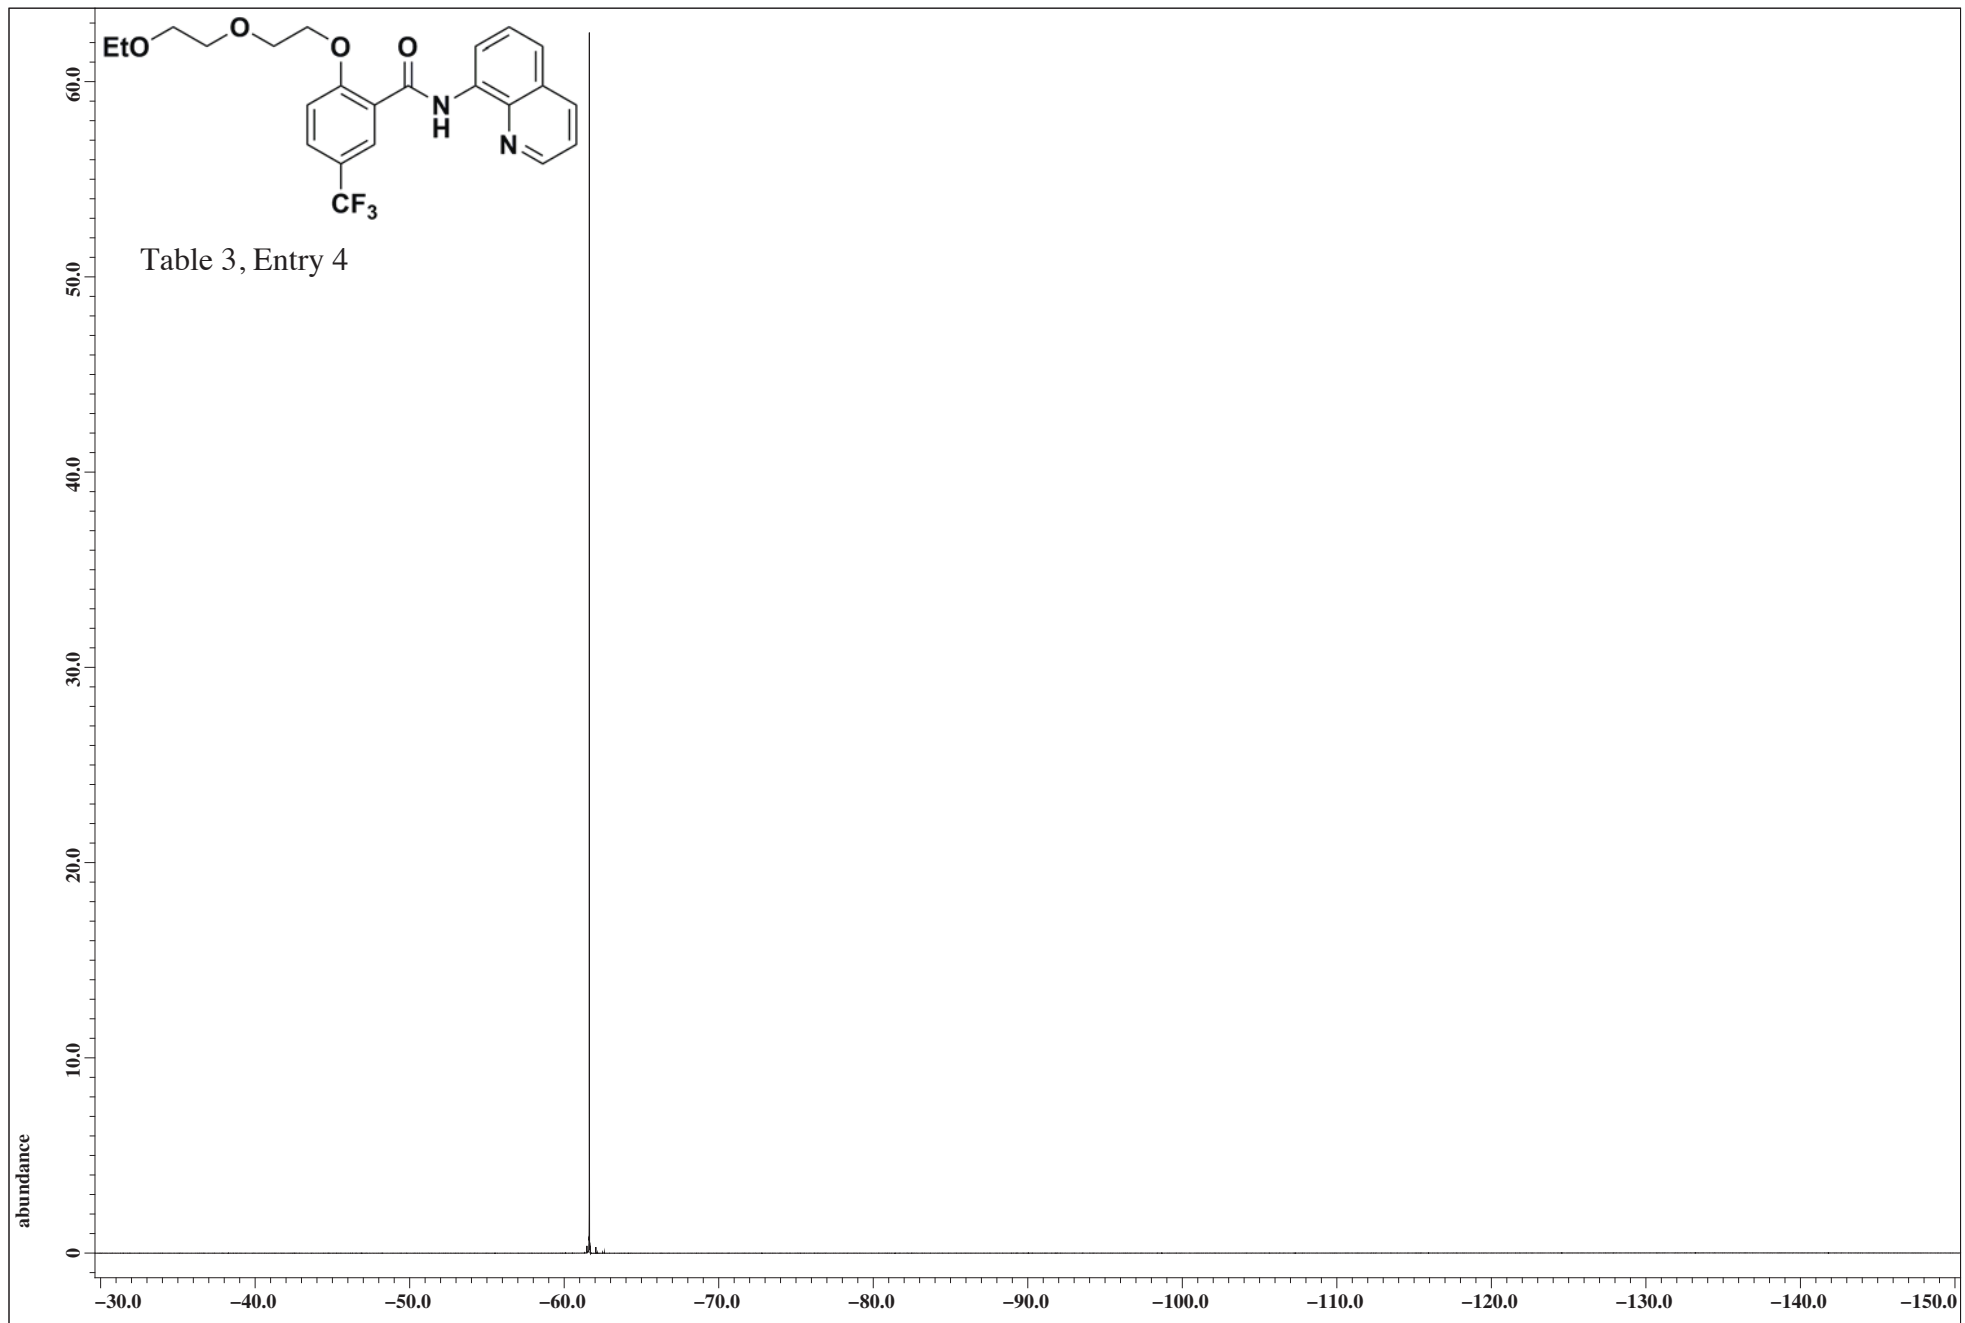

-61.6278

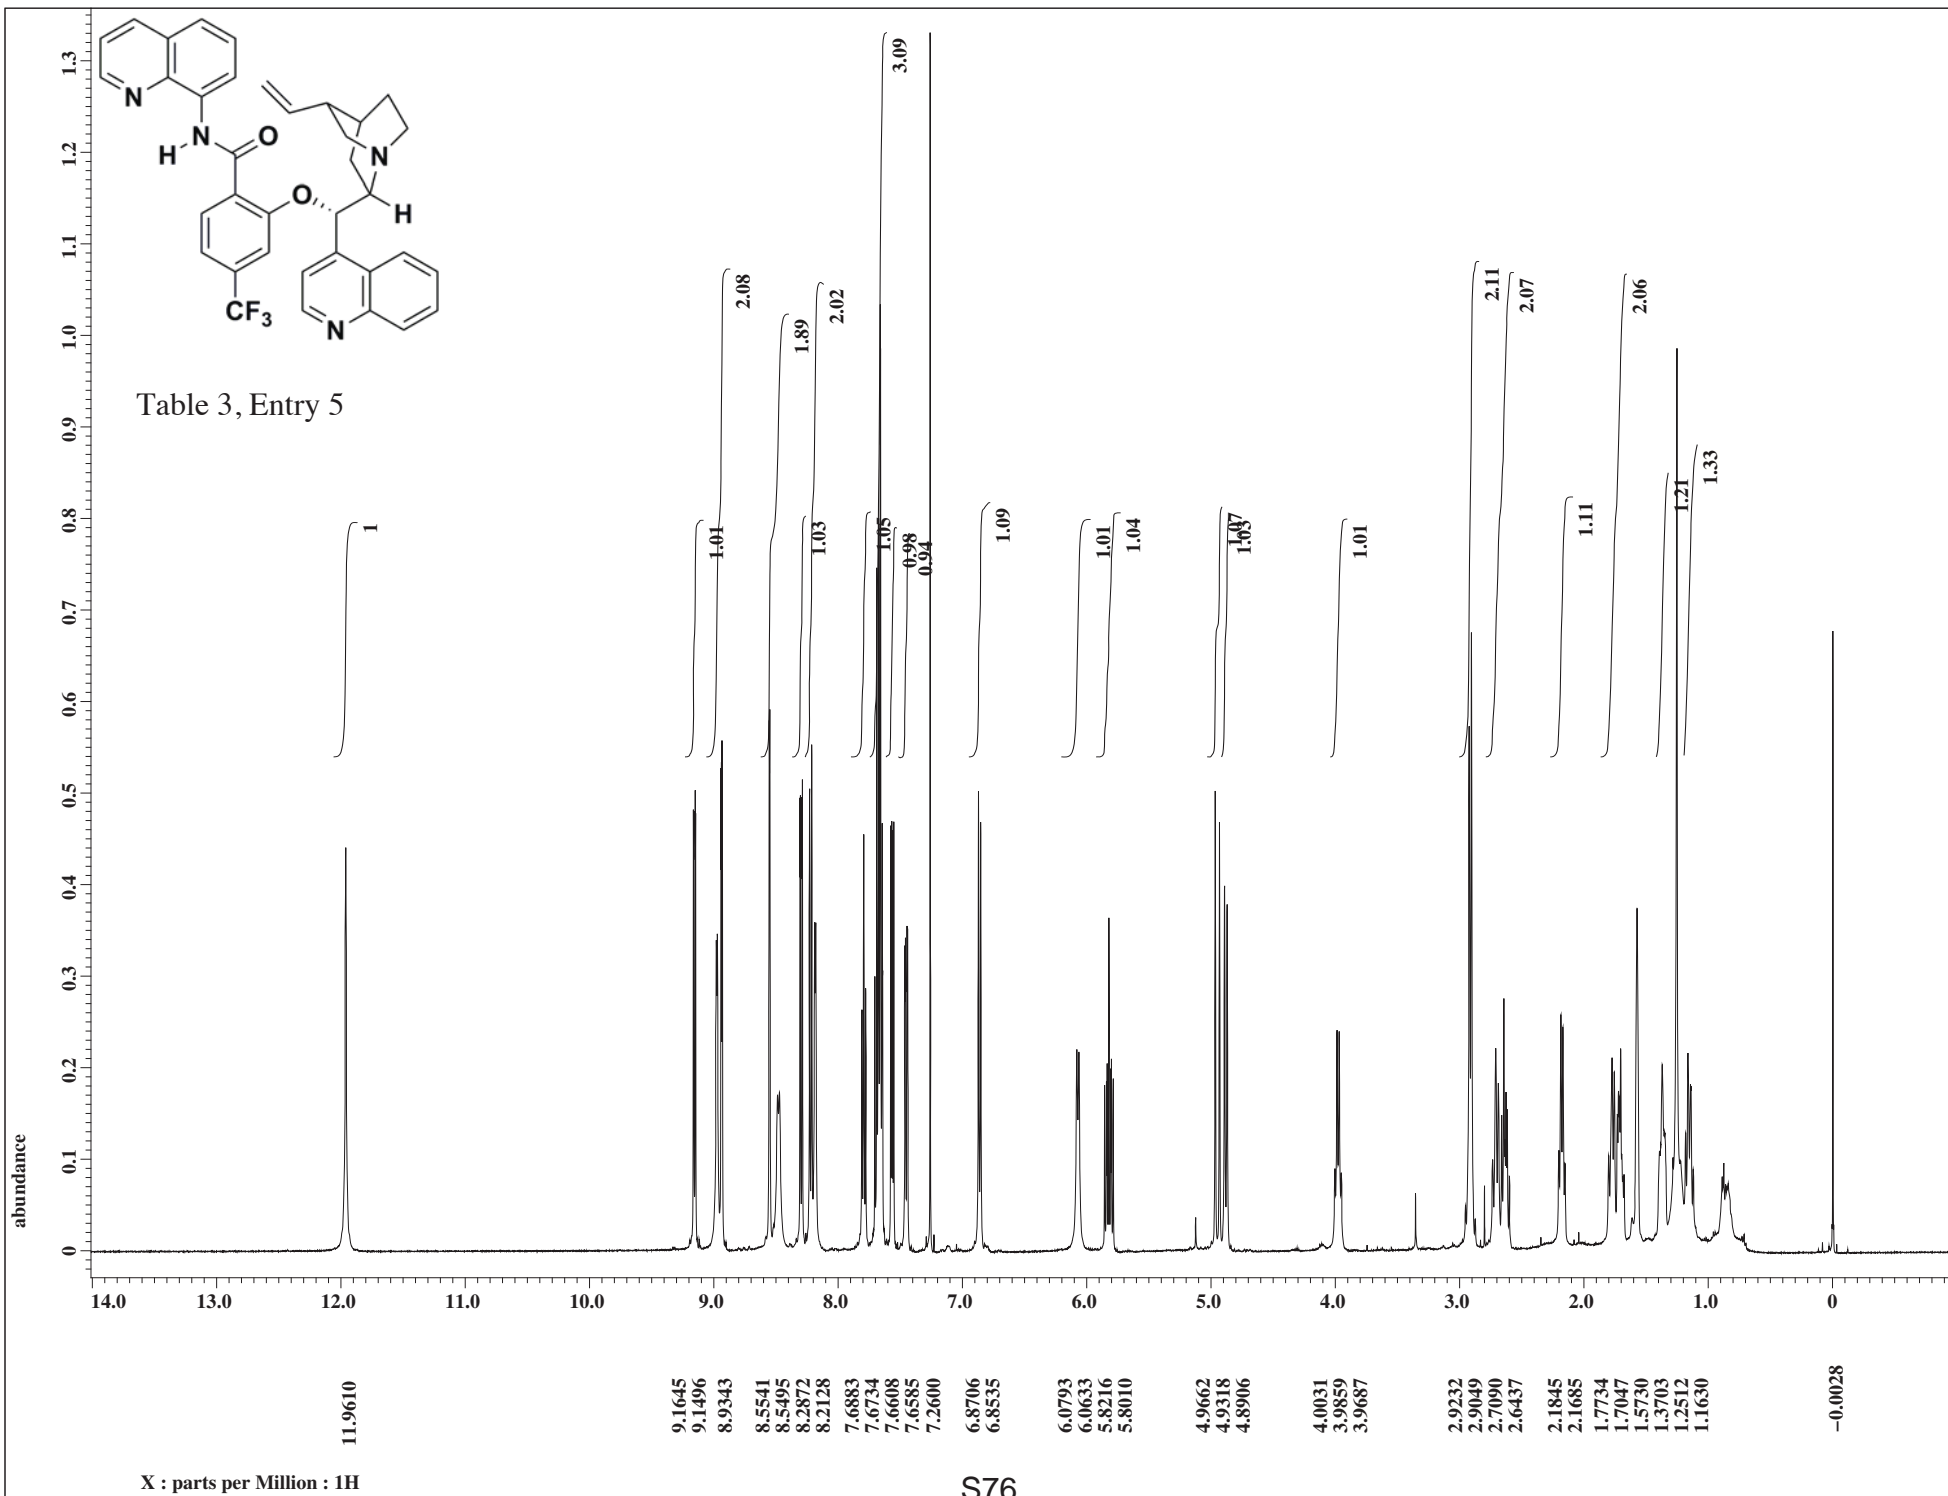

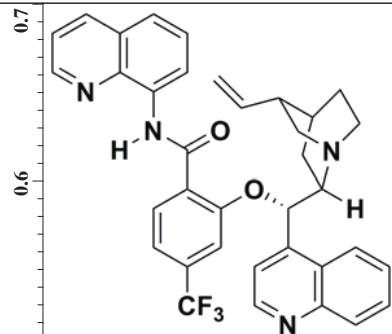

Table 3, Entry 5

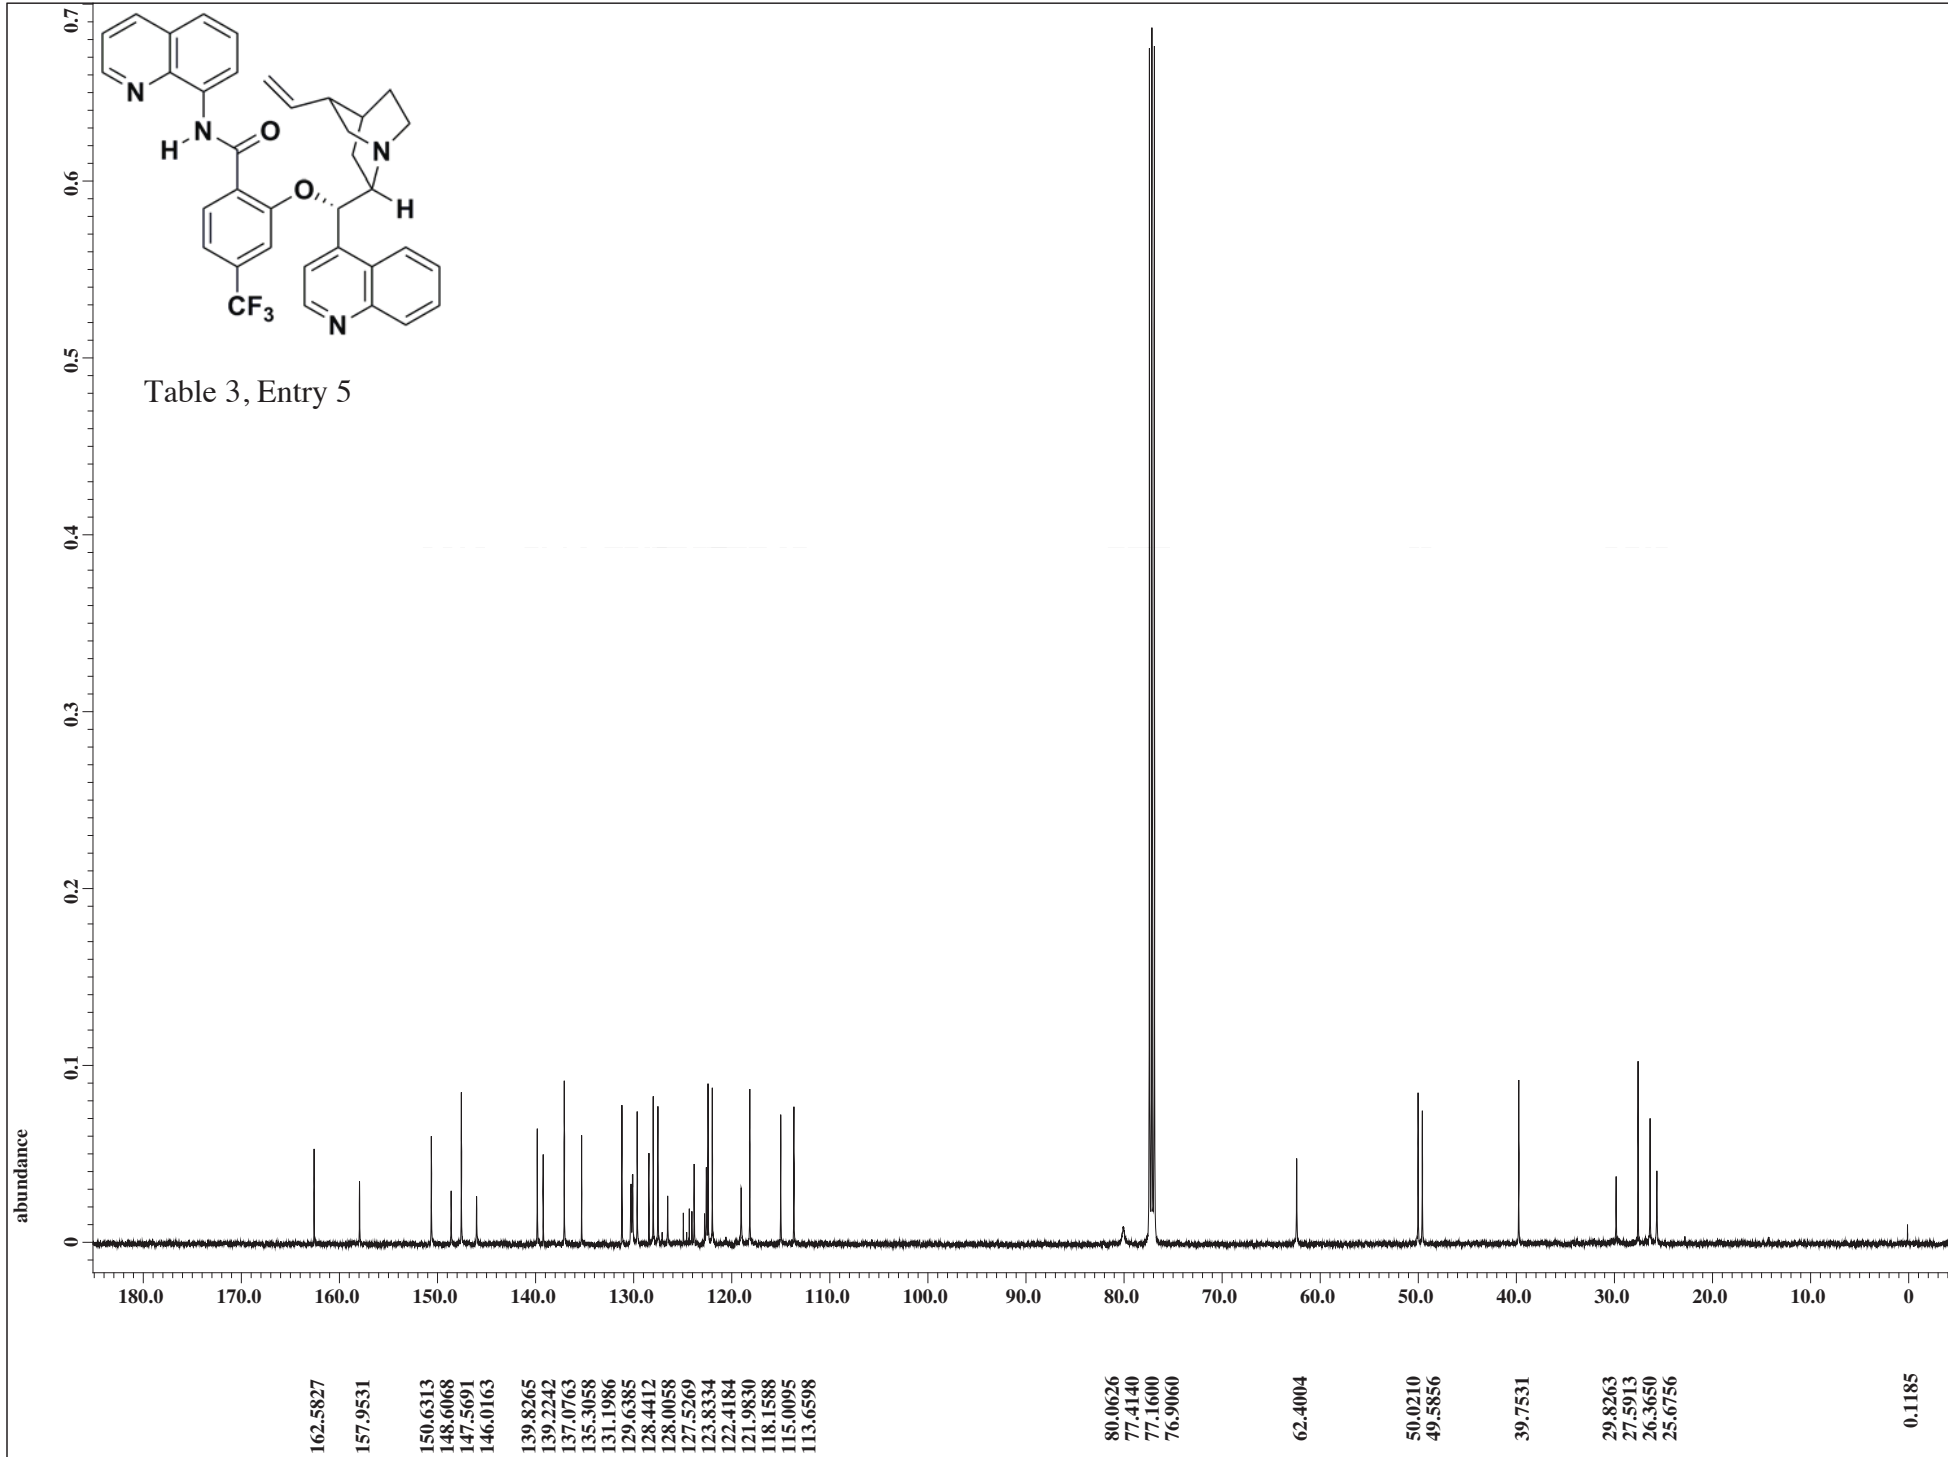

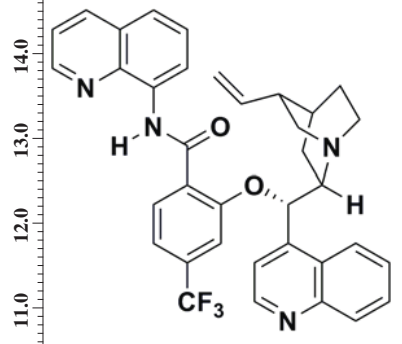

Table 3, Entry 5

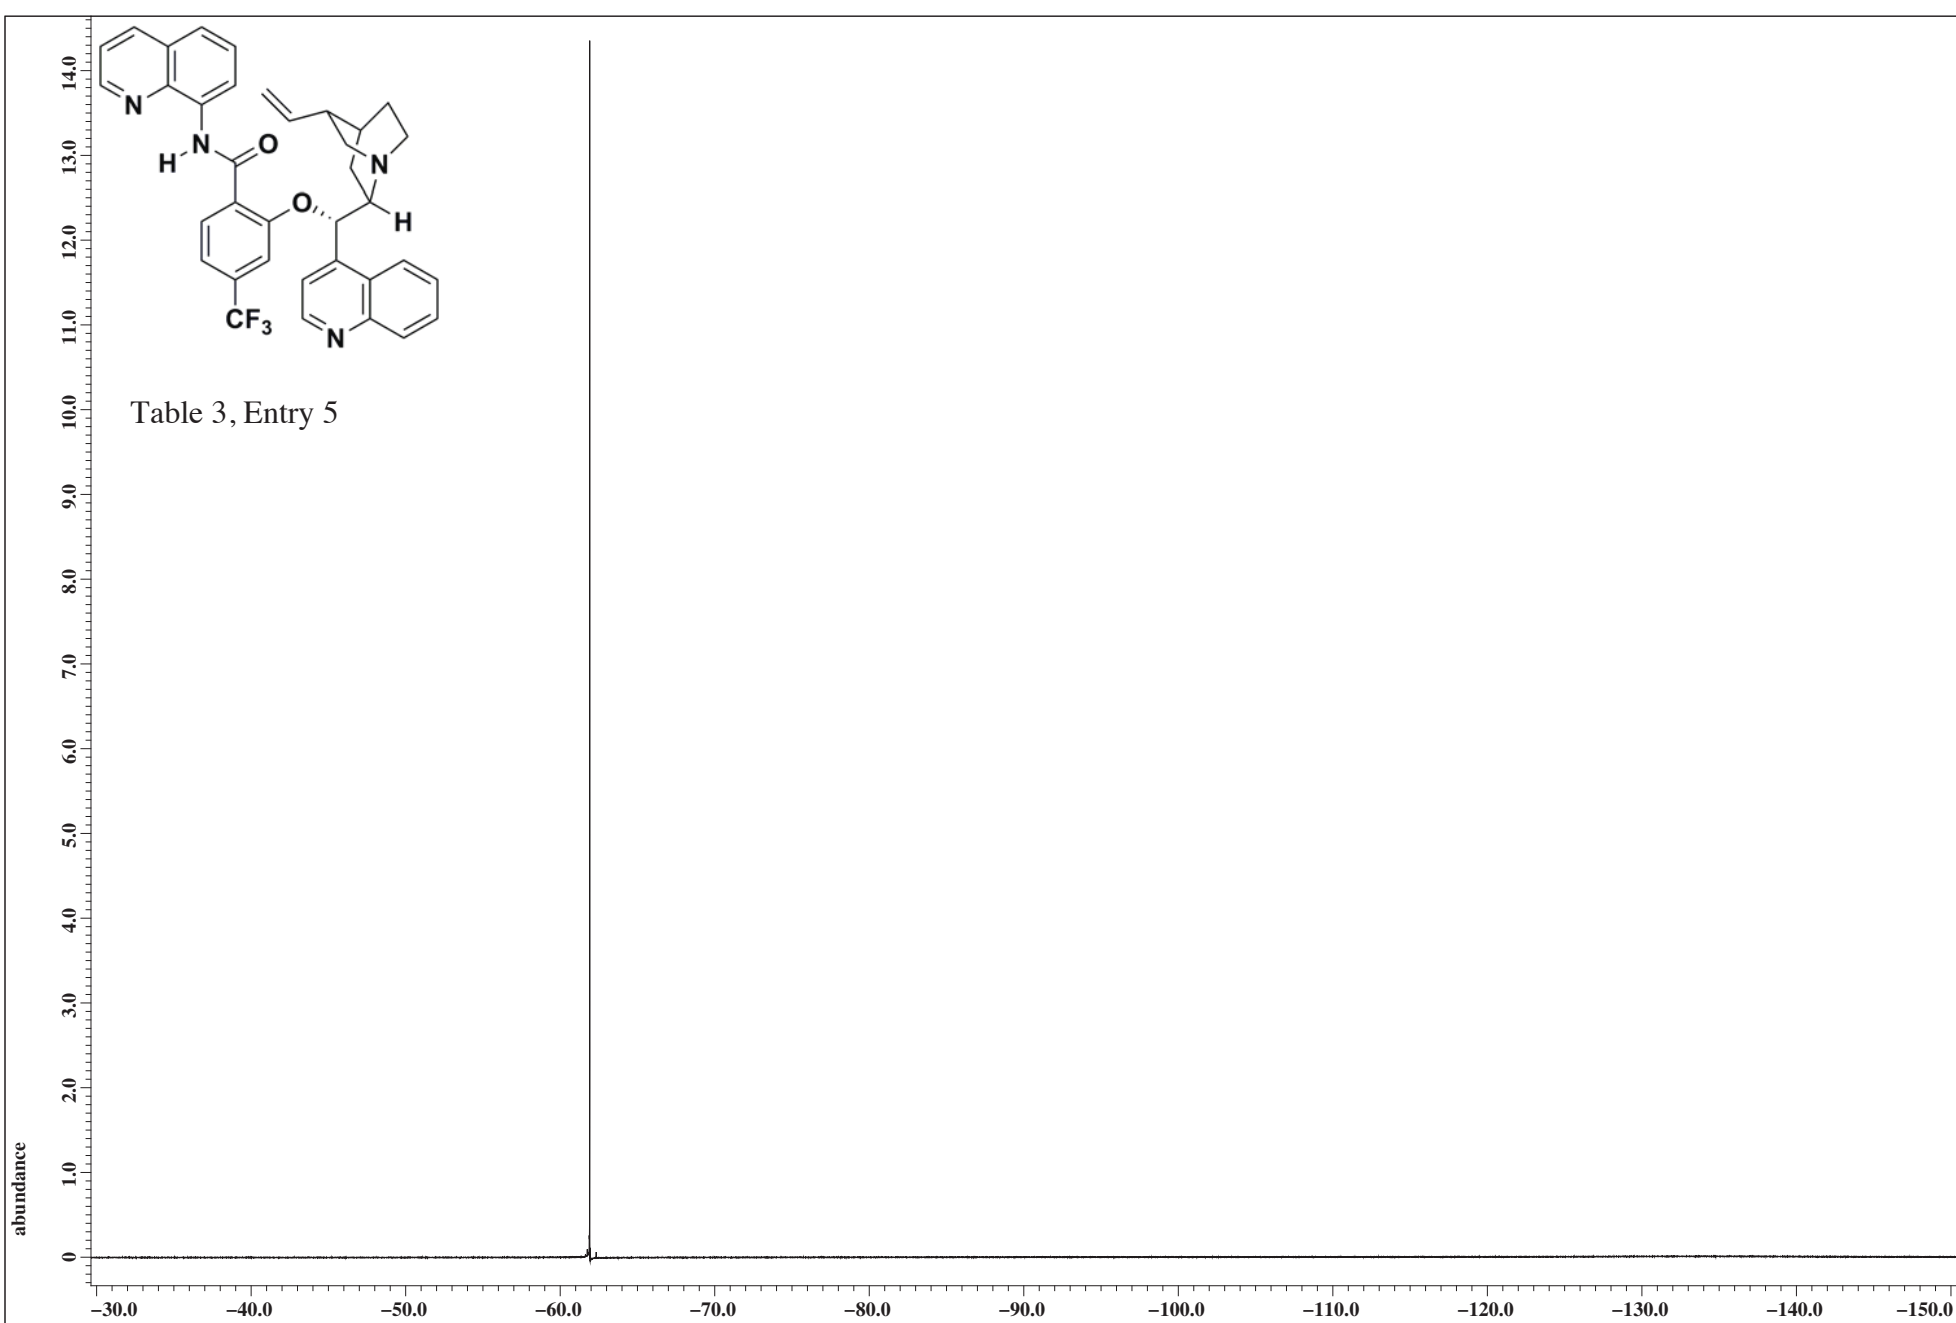

-61.9111

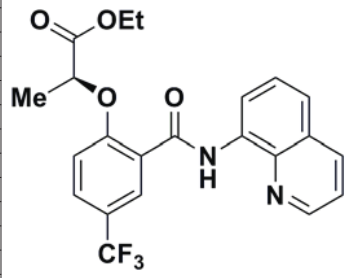

Table 3, Entry 6

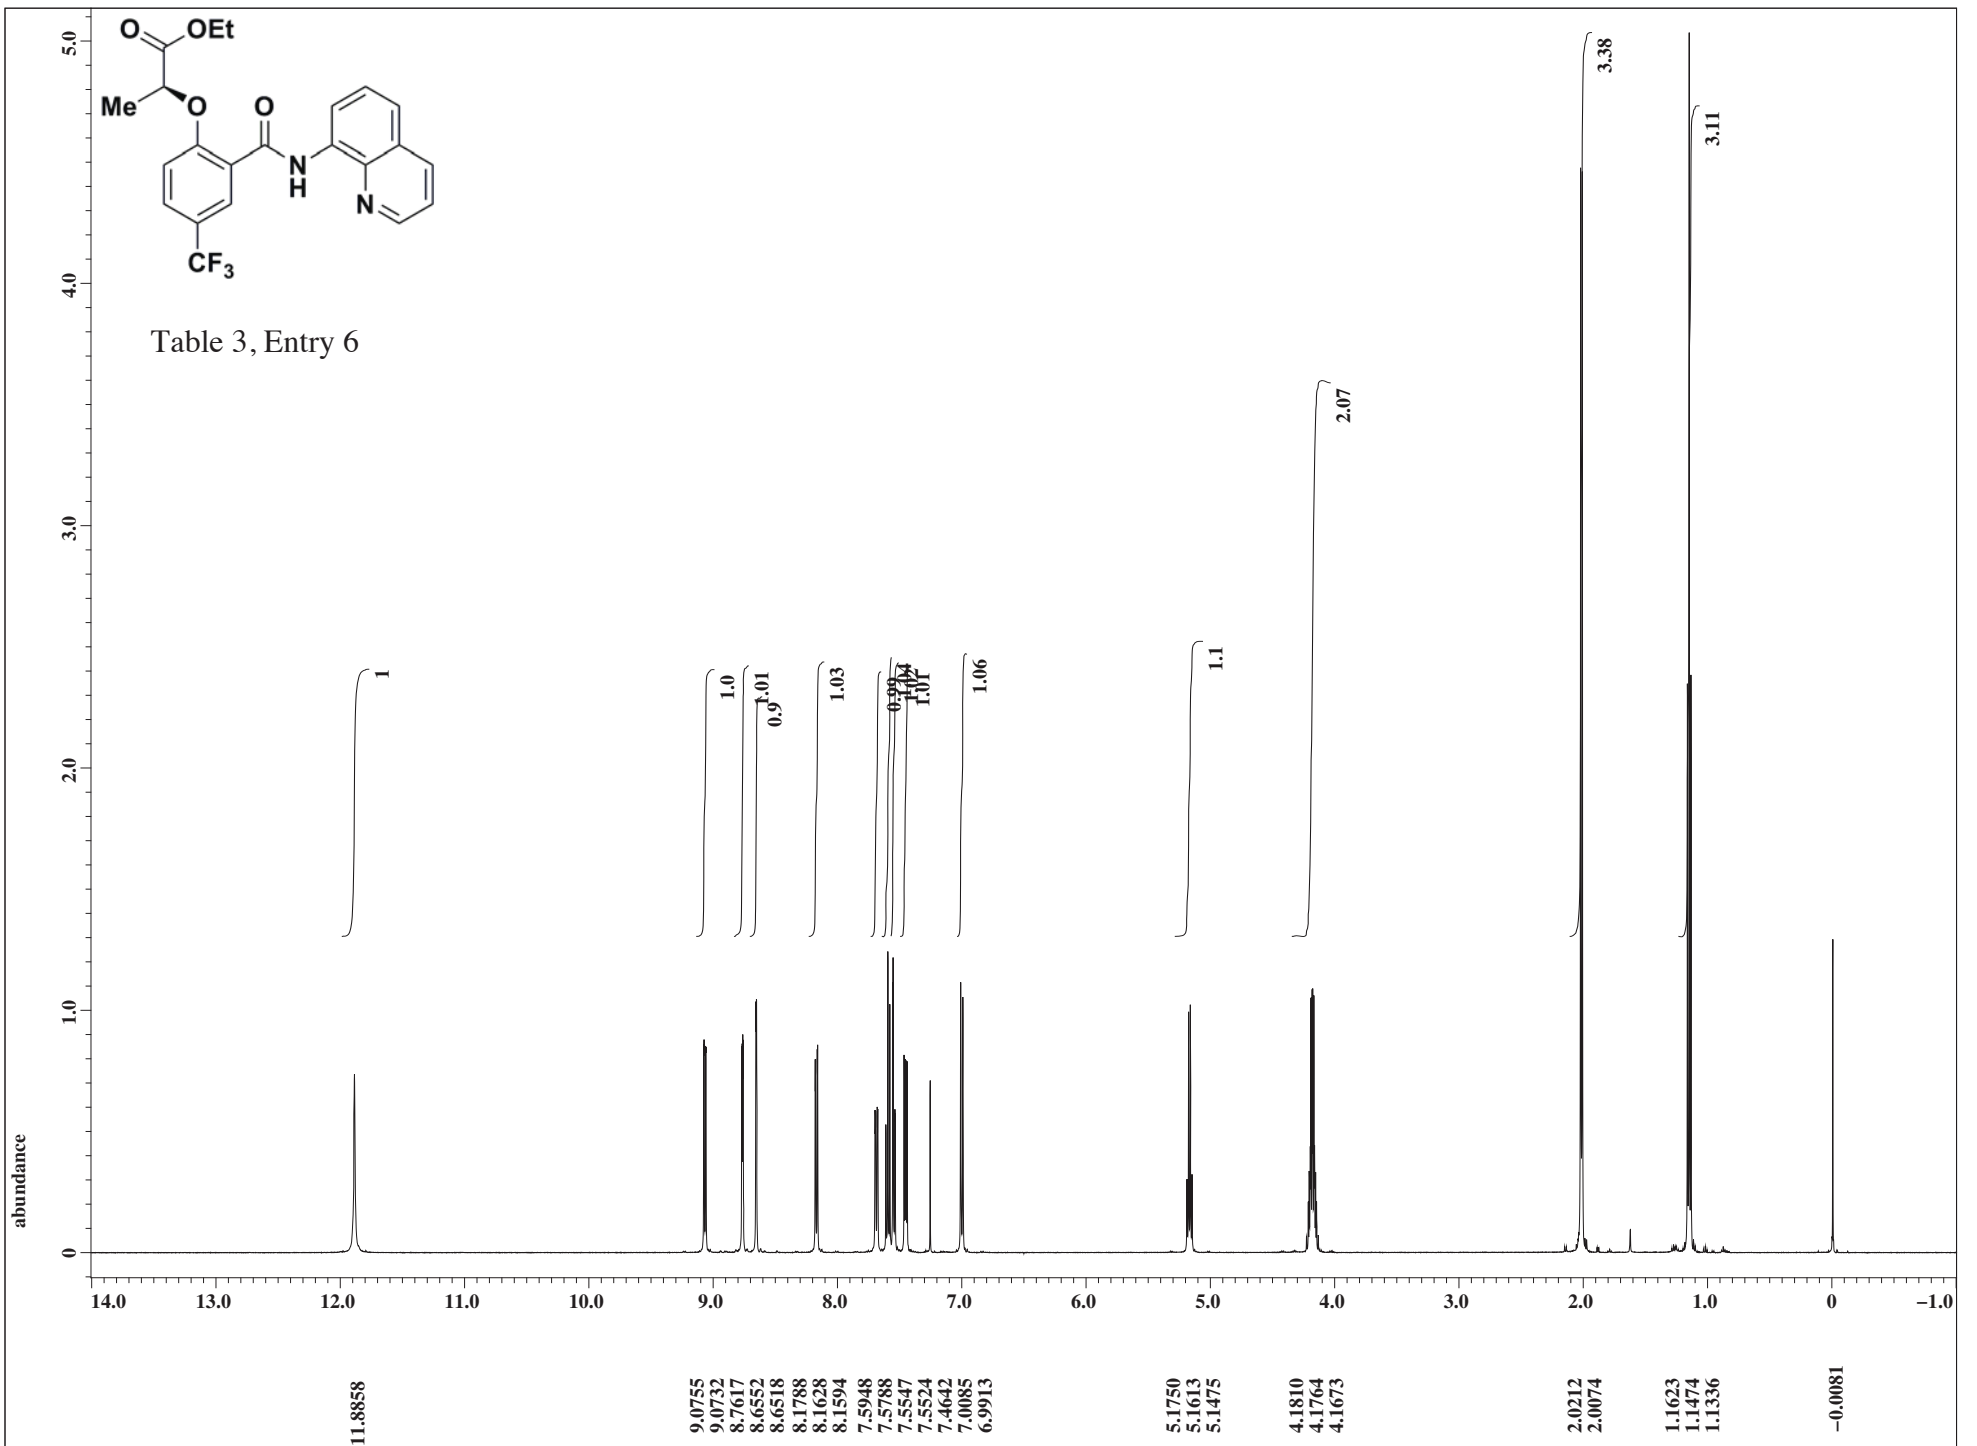

X : parts per Million : 1H

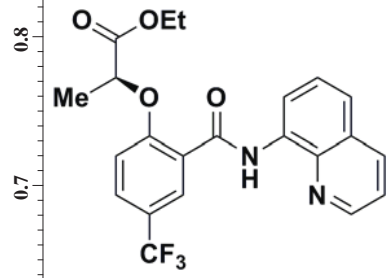

Table 3, Entry 6

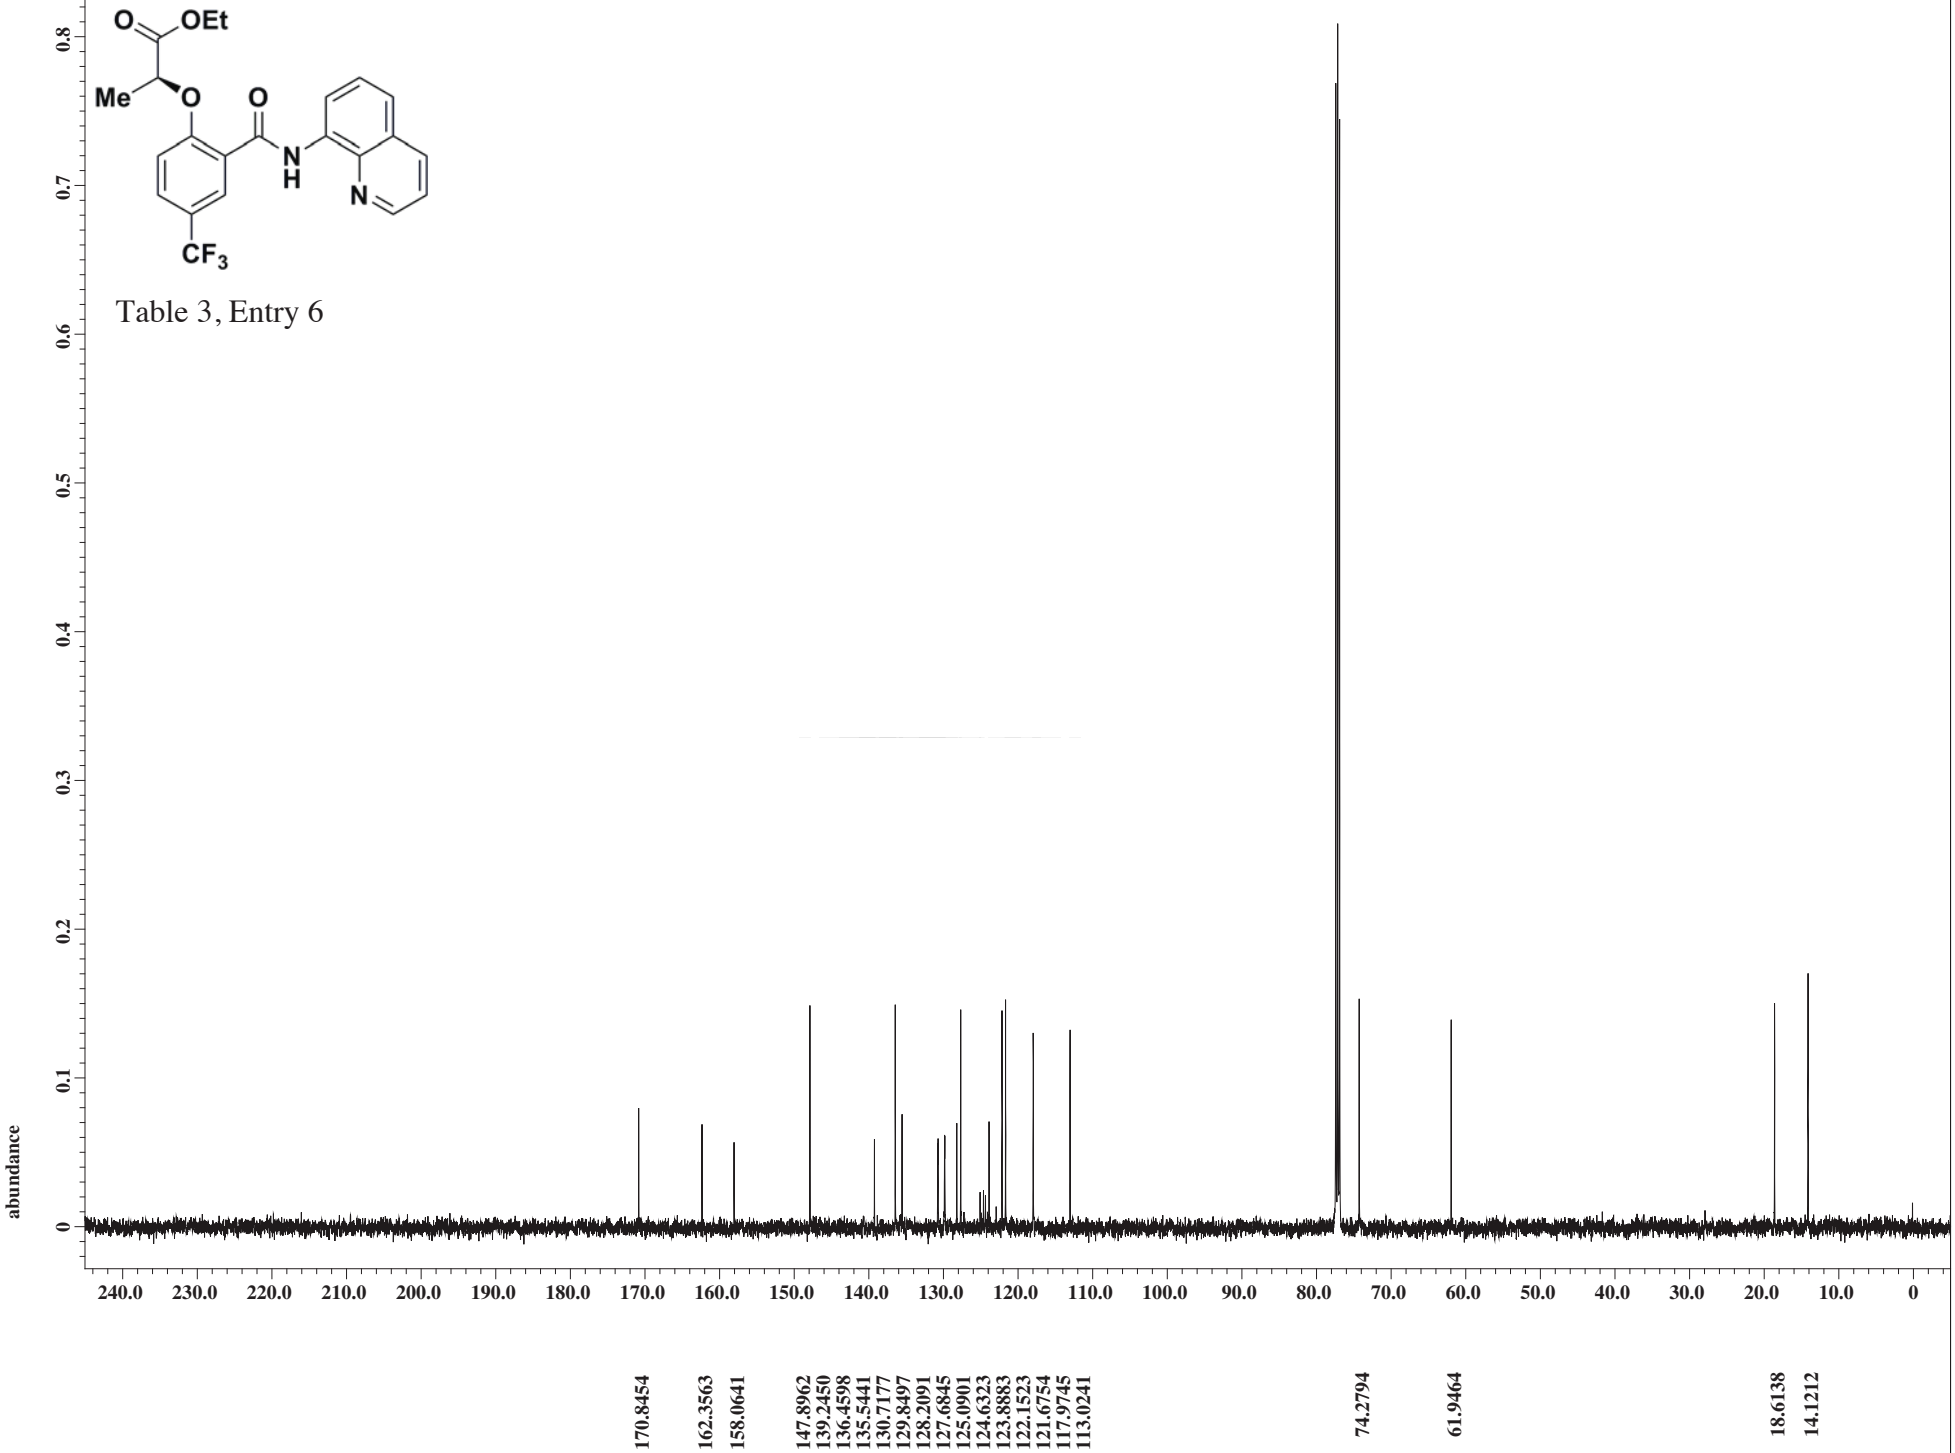

X : parts per Million : 13C



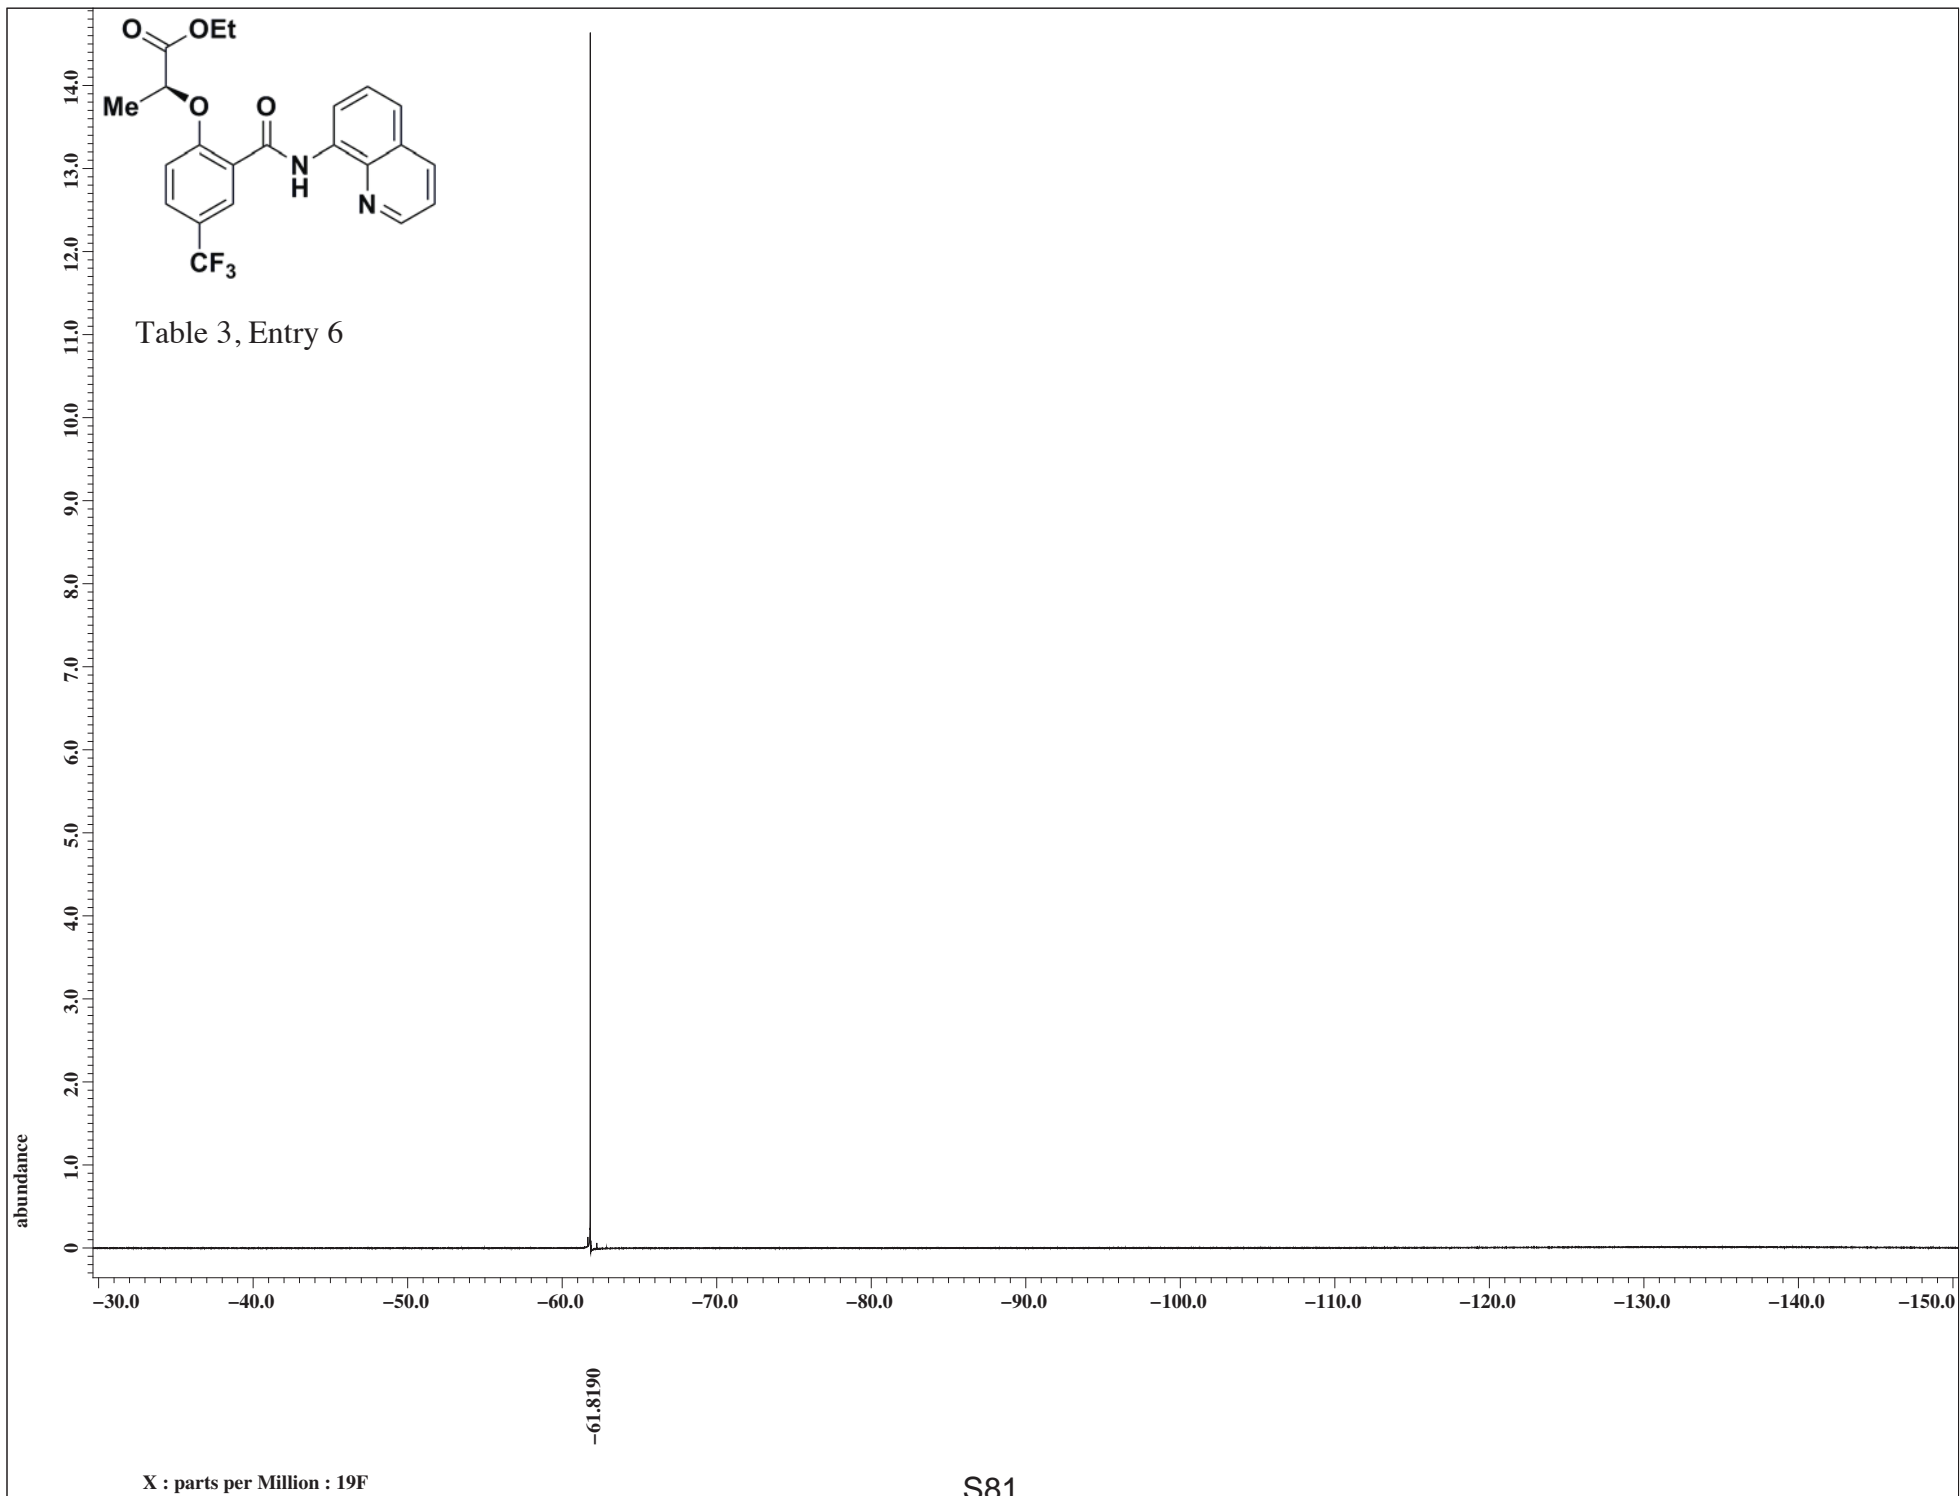

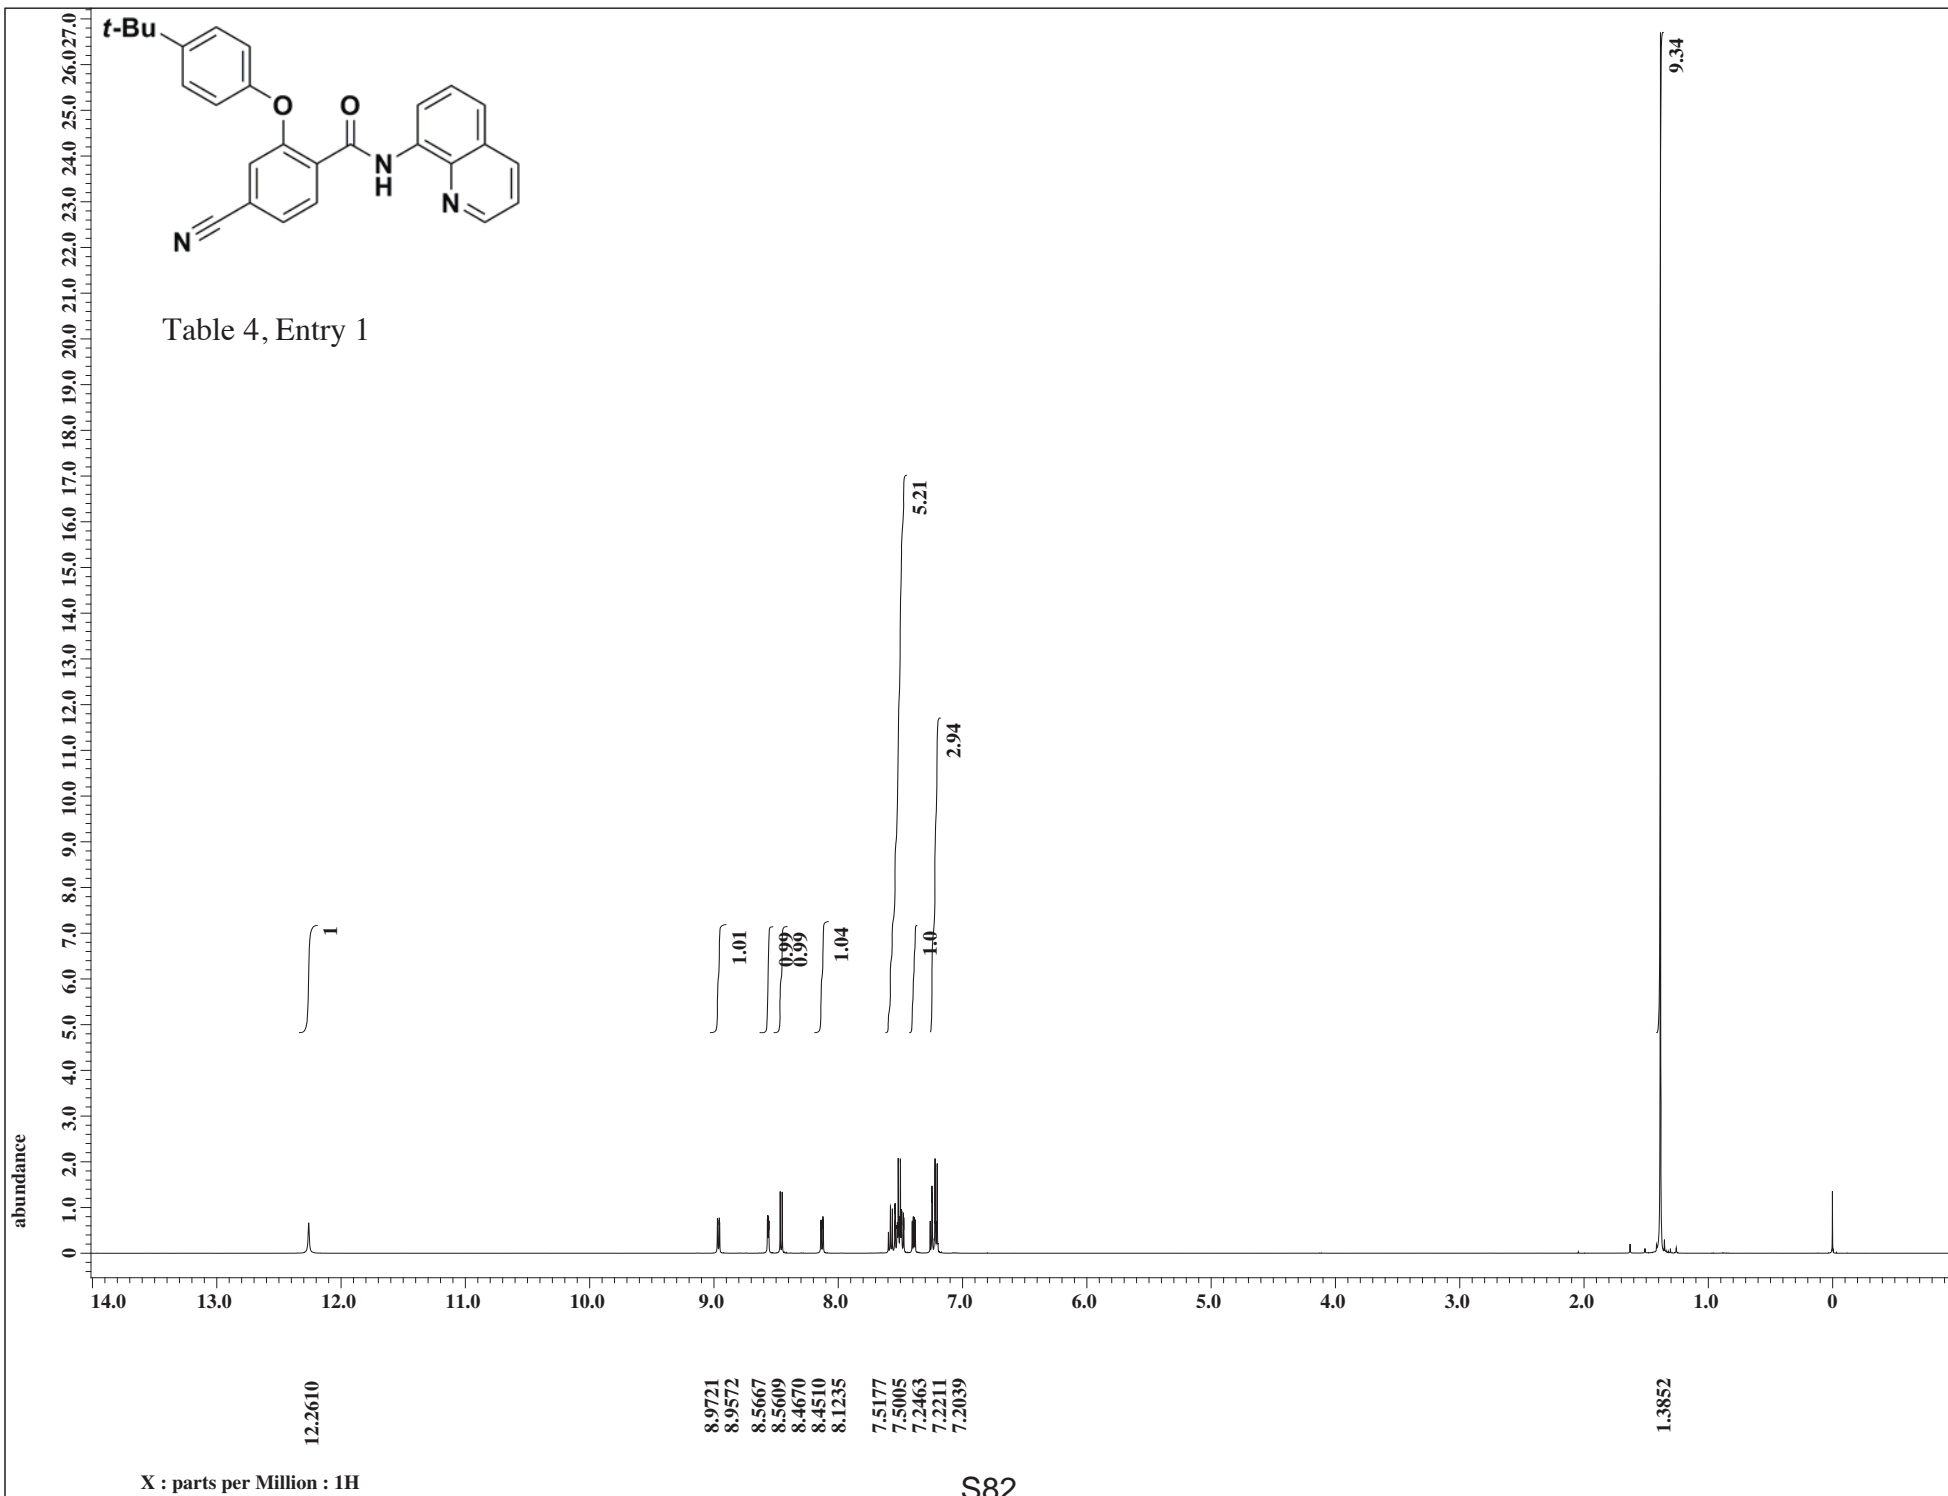

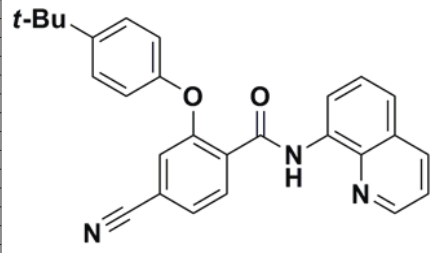

Table 4, Entry 1

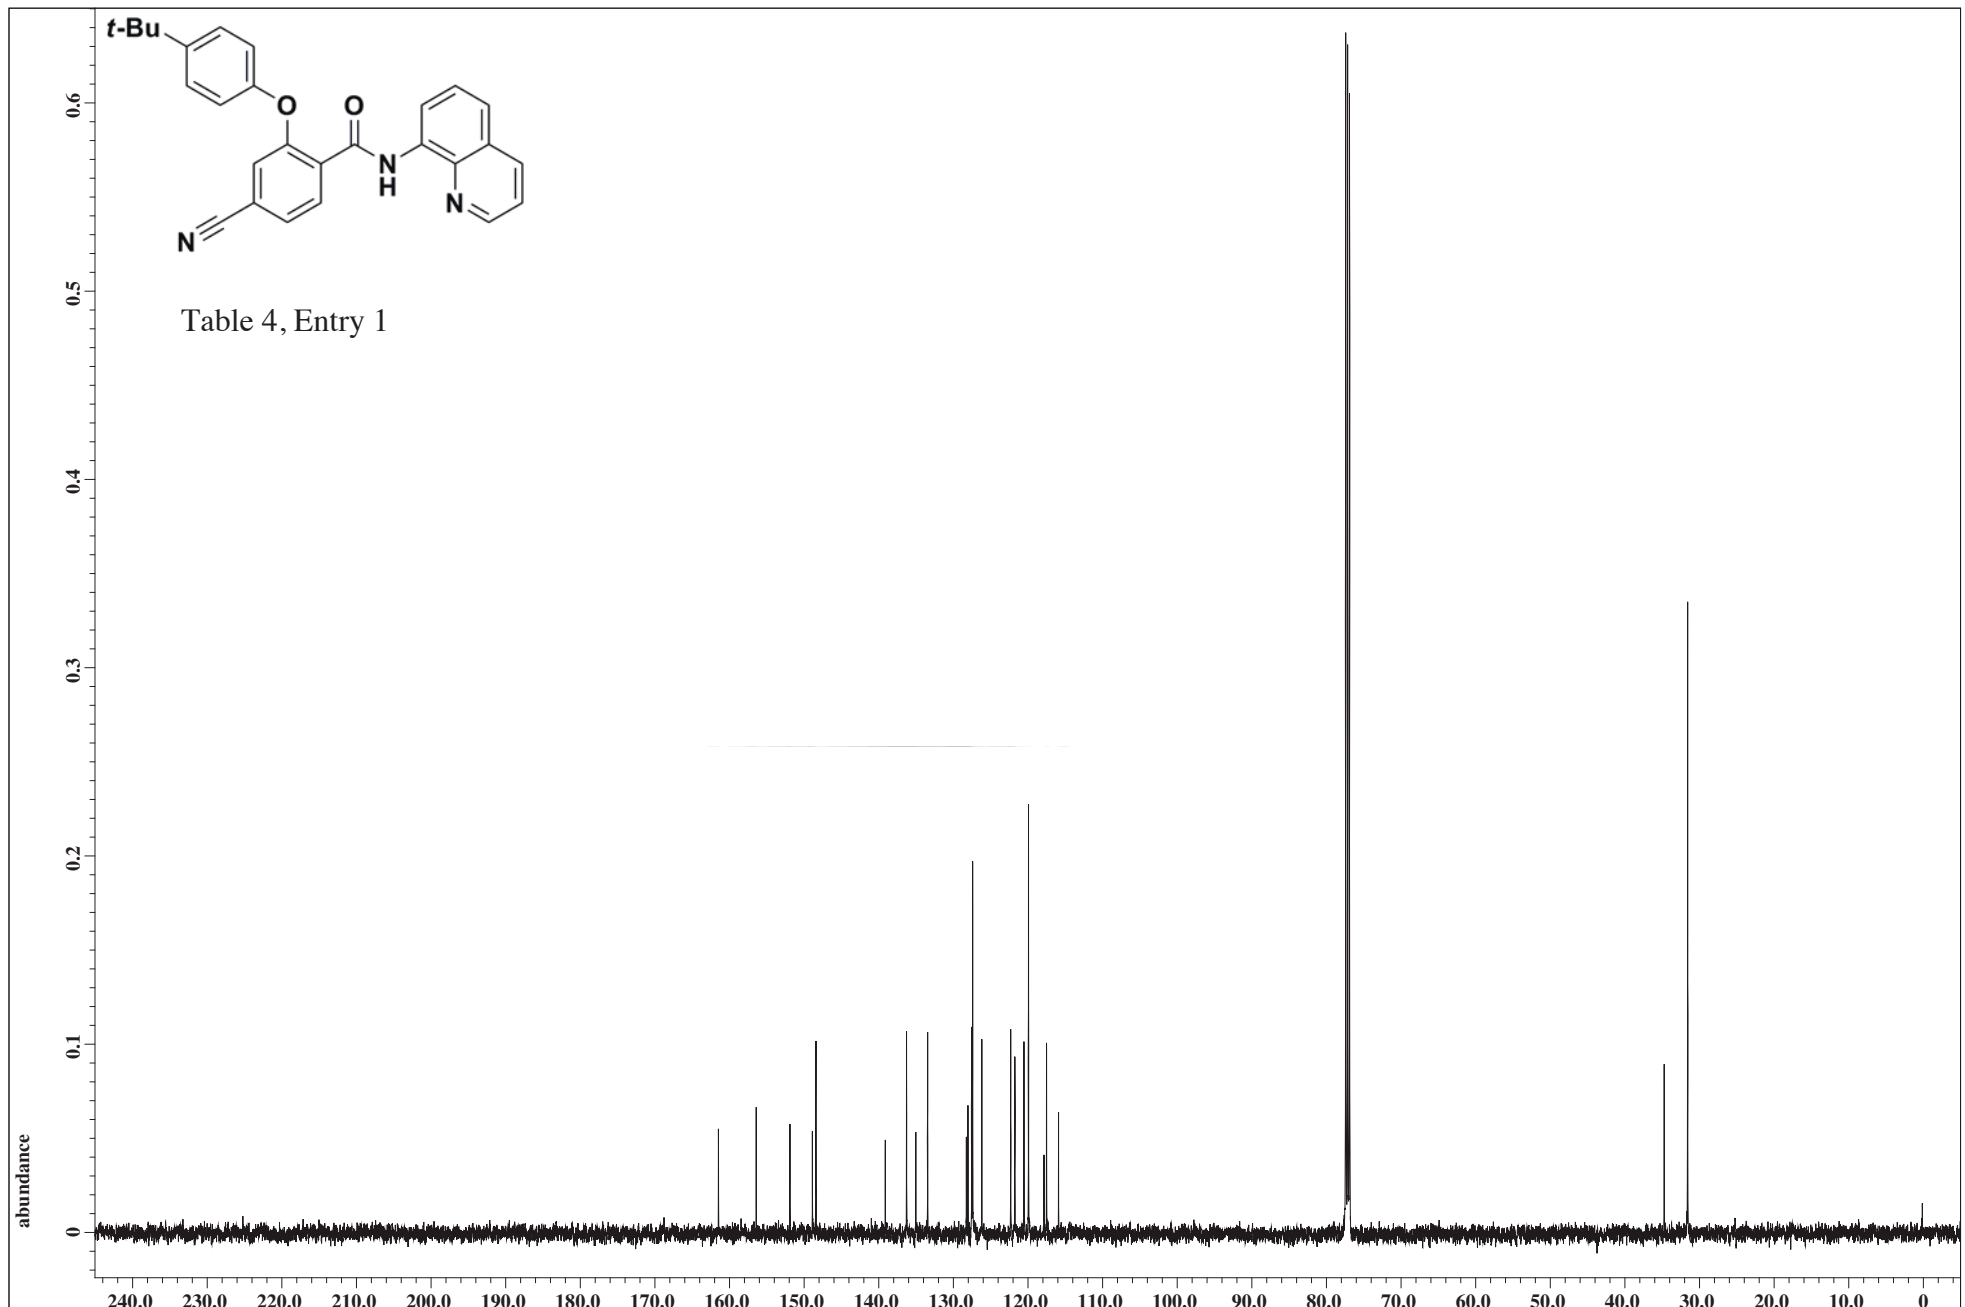

- 161.4883
- 156.4235
- 151.9023
- 148.8977
- 148.4113
- 136.2785
- 135.0290
- 133.4456
- 128.2568
- 128.0470
- 127.5414
- 127.4174
- 126.1870
- 122.3144
- 121.7612
- 120.5403
- 119.9298
- 117.5166
- 115.9047

- 34.7335
- 31.5859

X : parts per Million : 13C

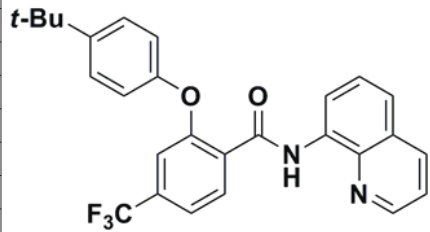

Table 4, Entry 2

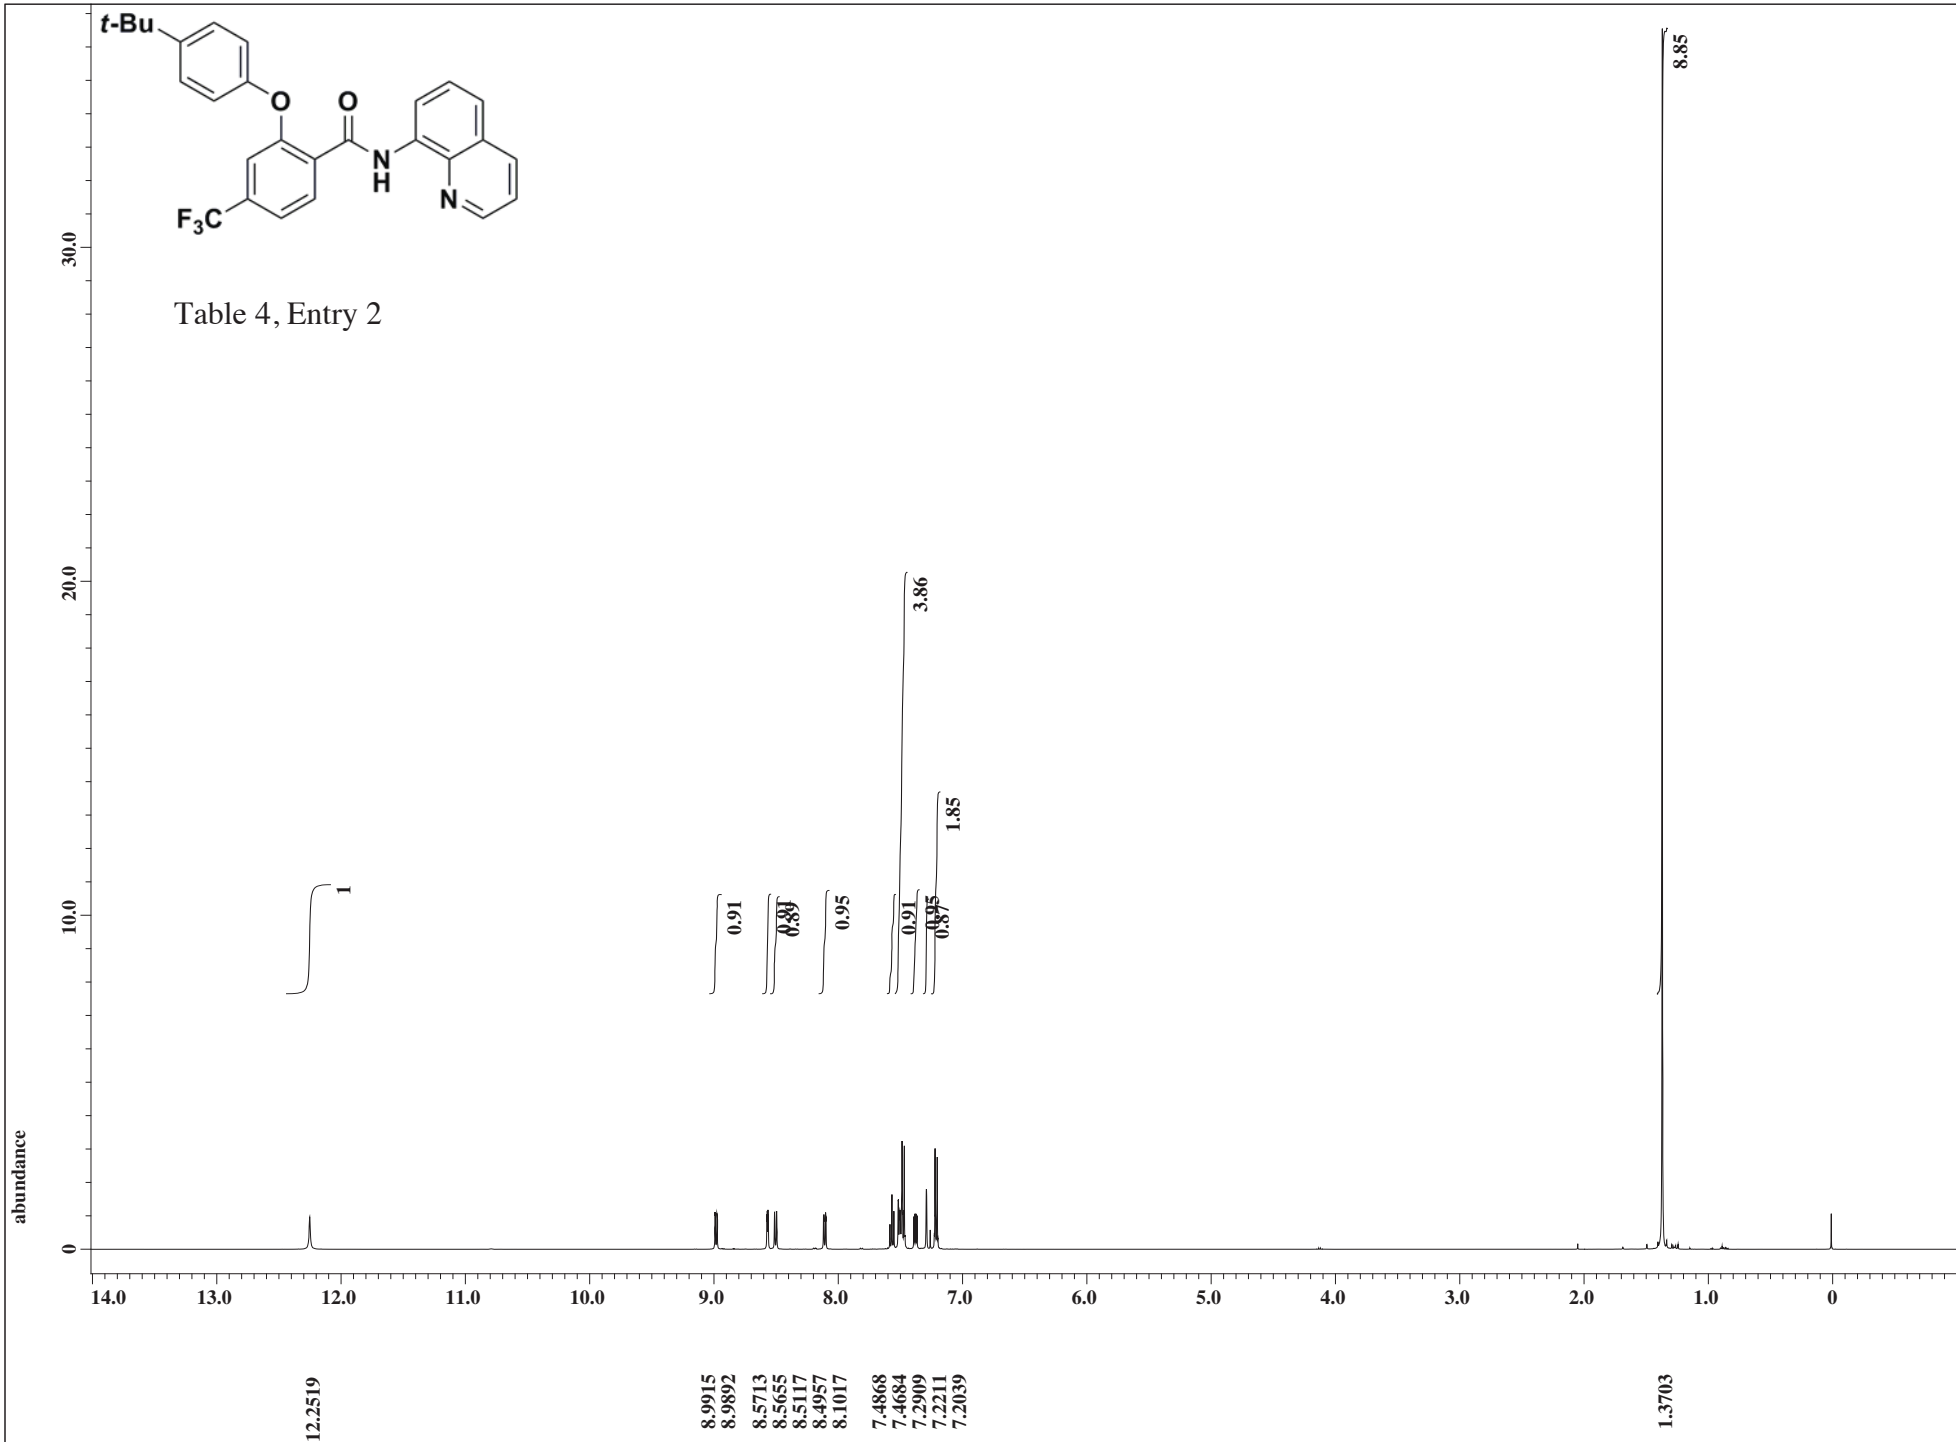

X : parts per Million : 1H

S84

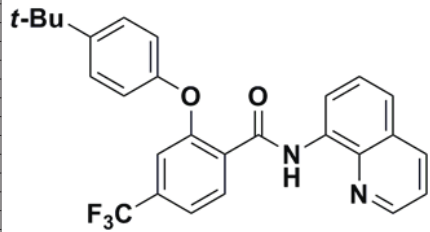

Table 4, Entry 2

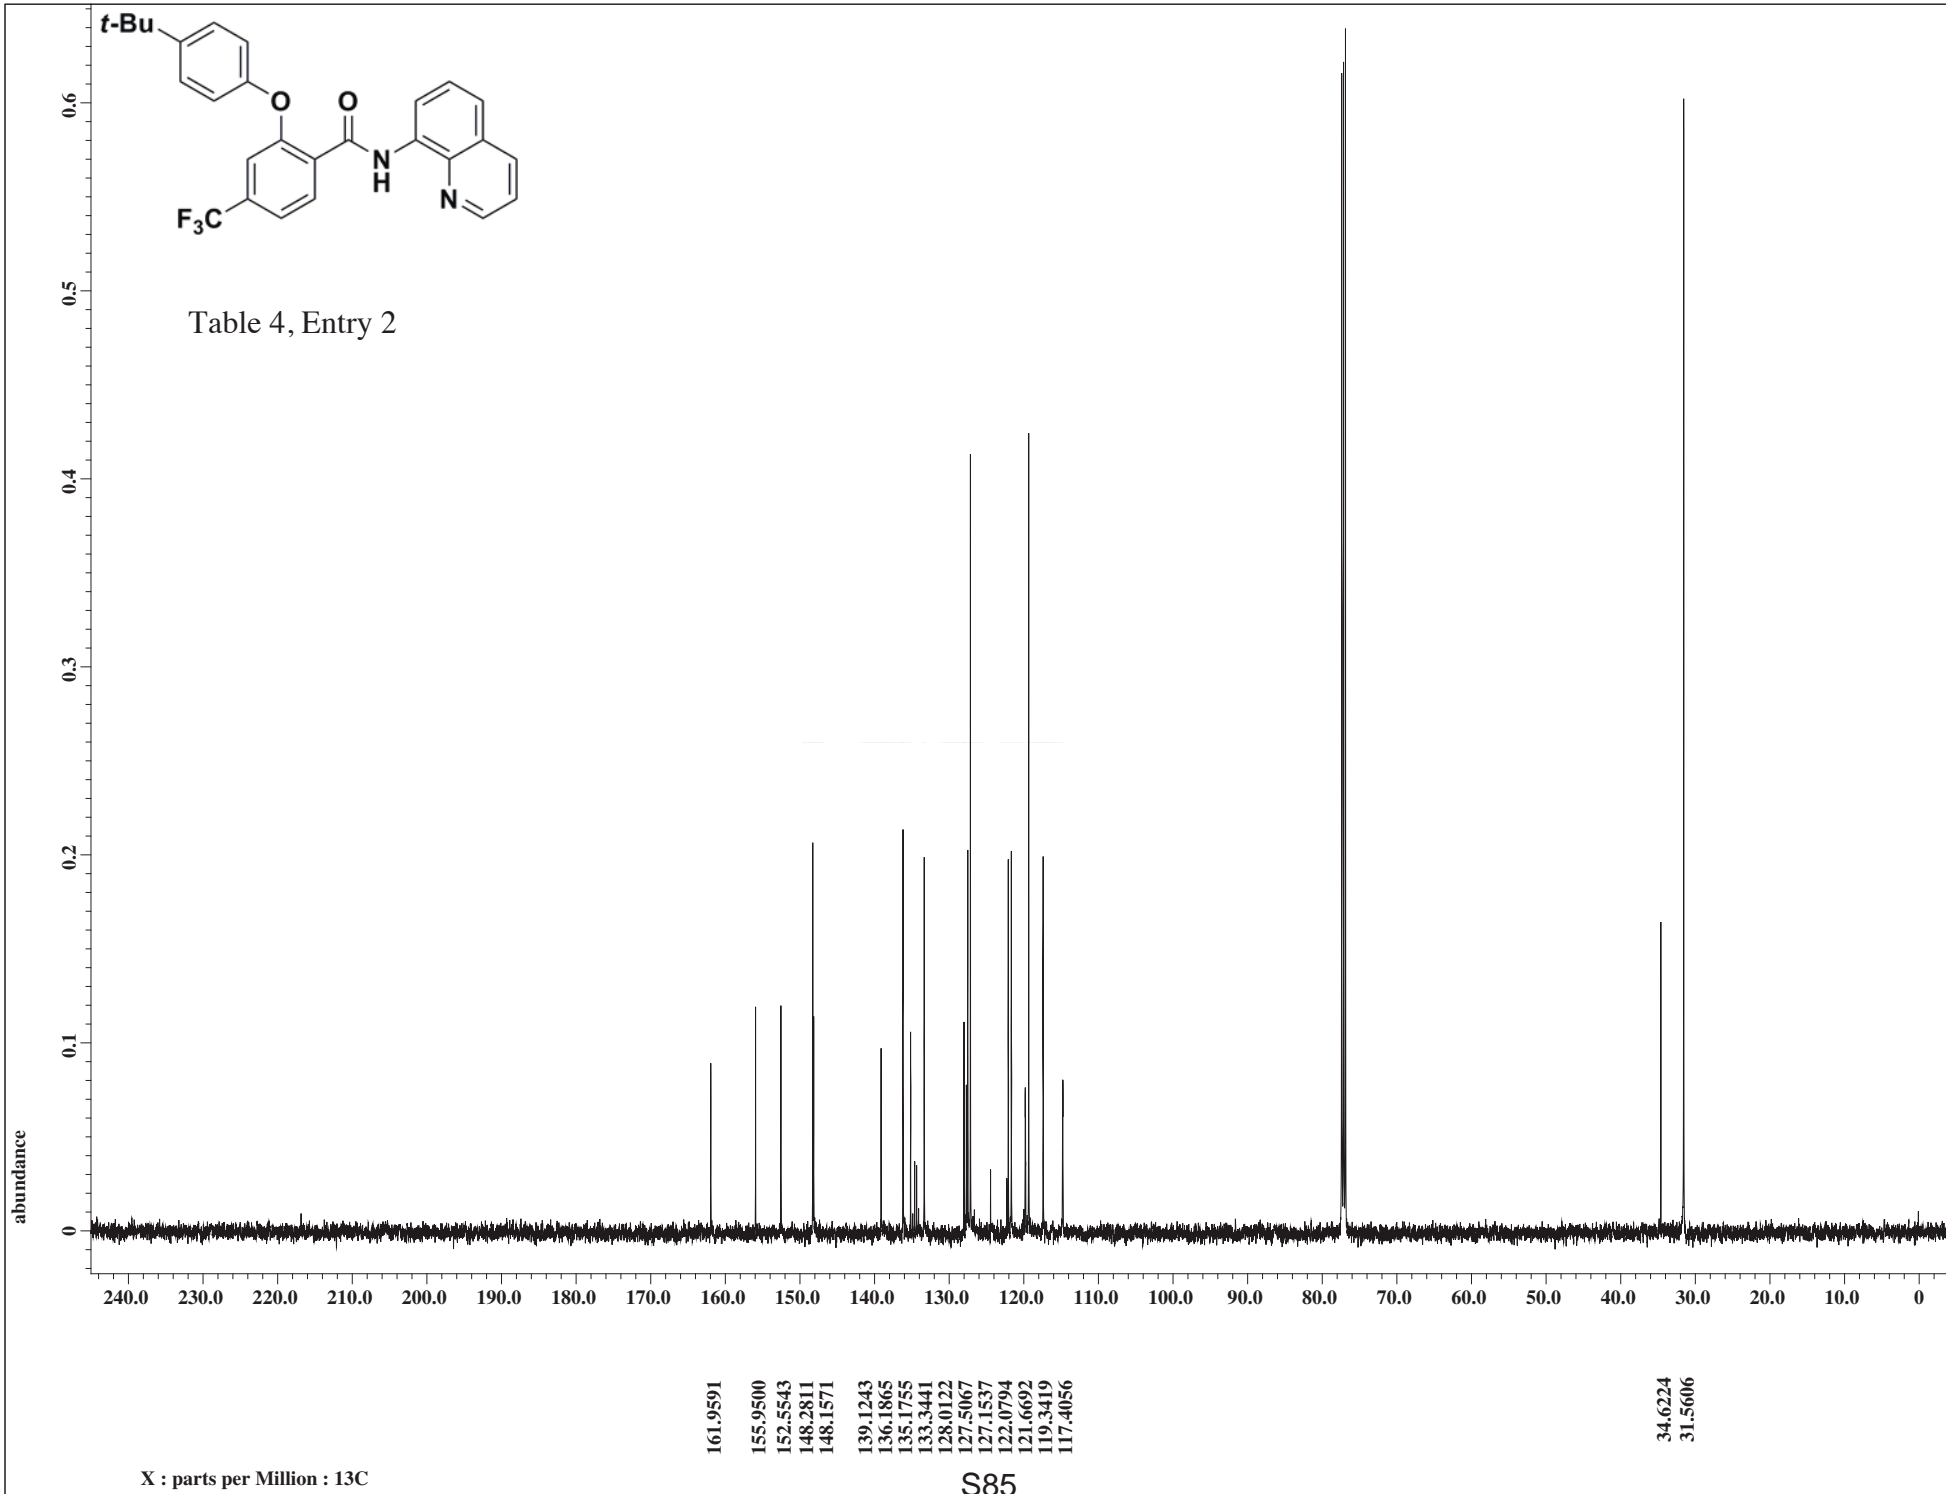

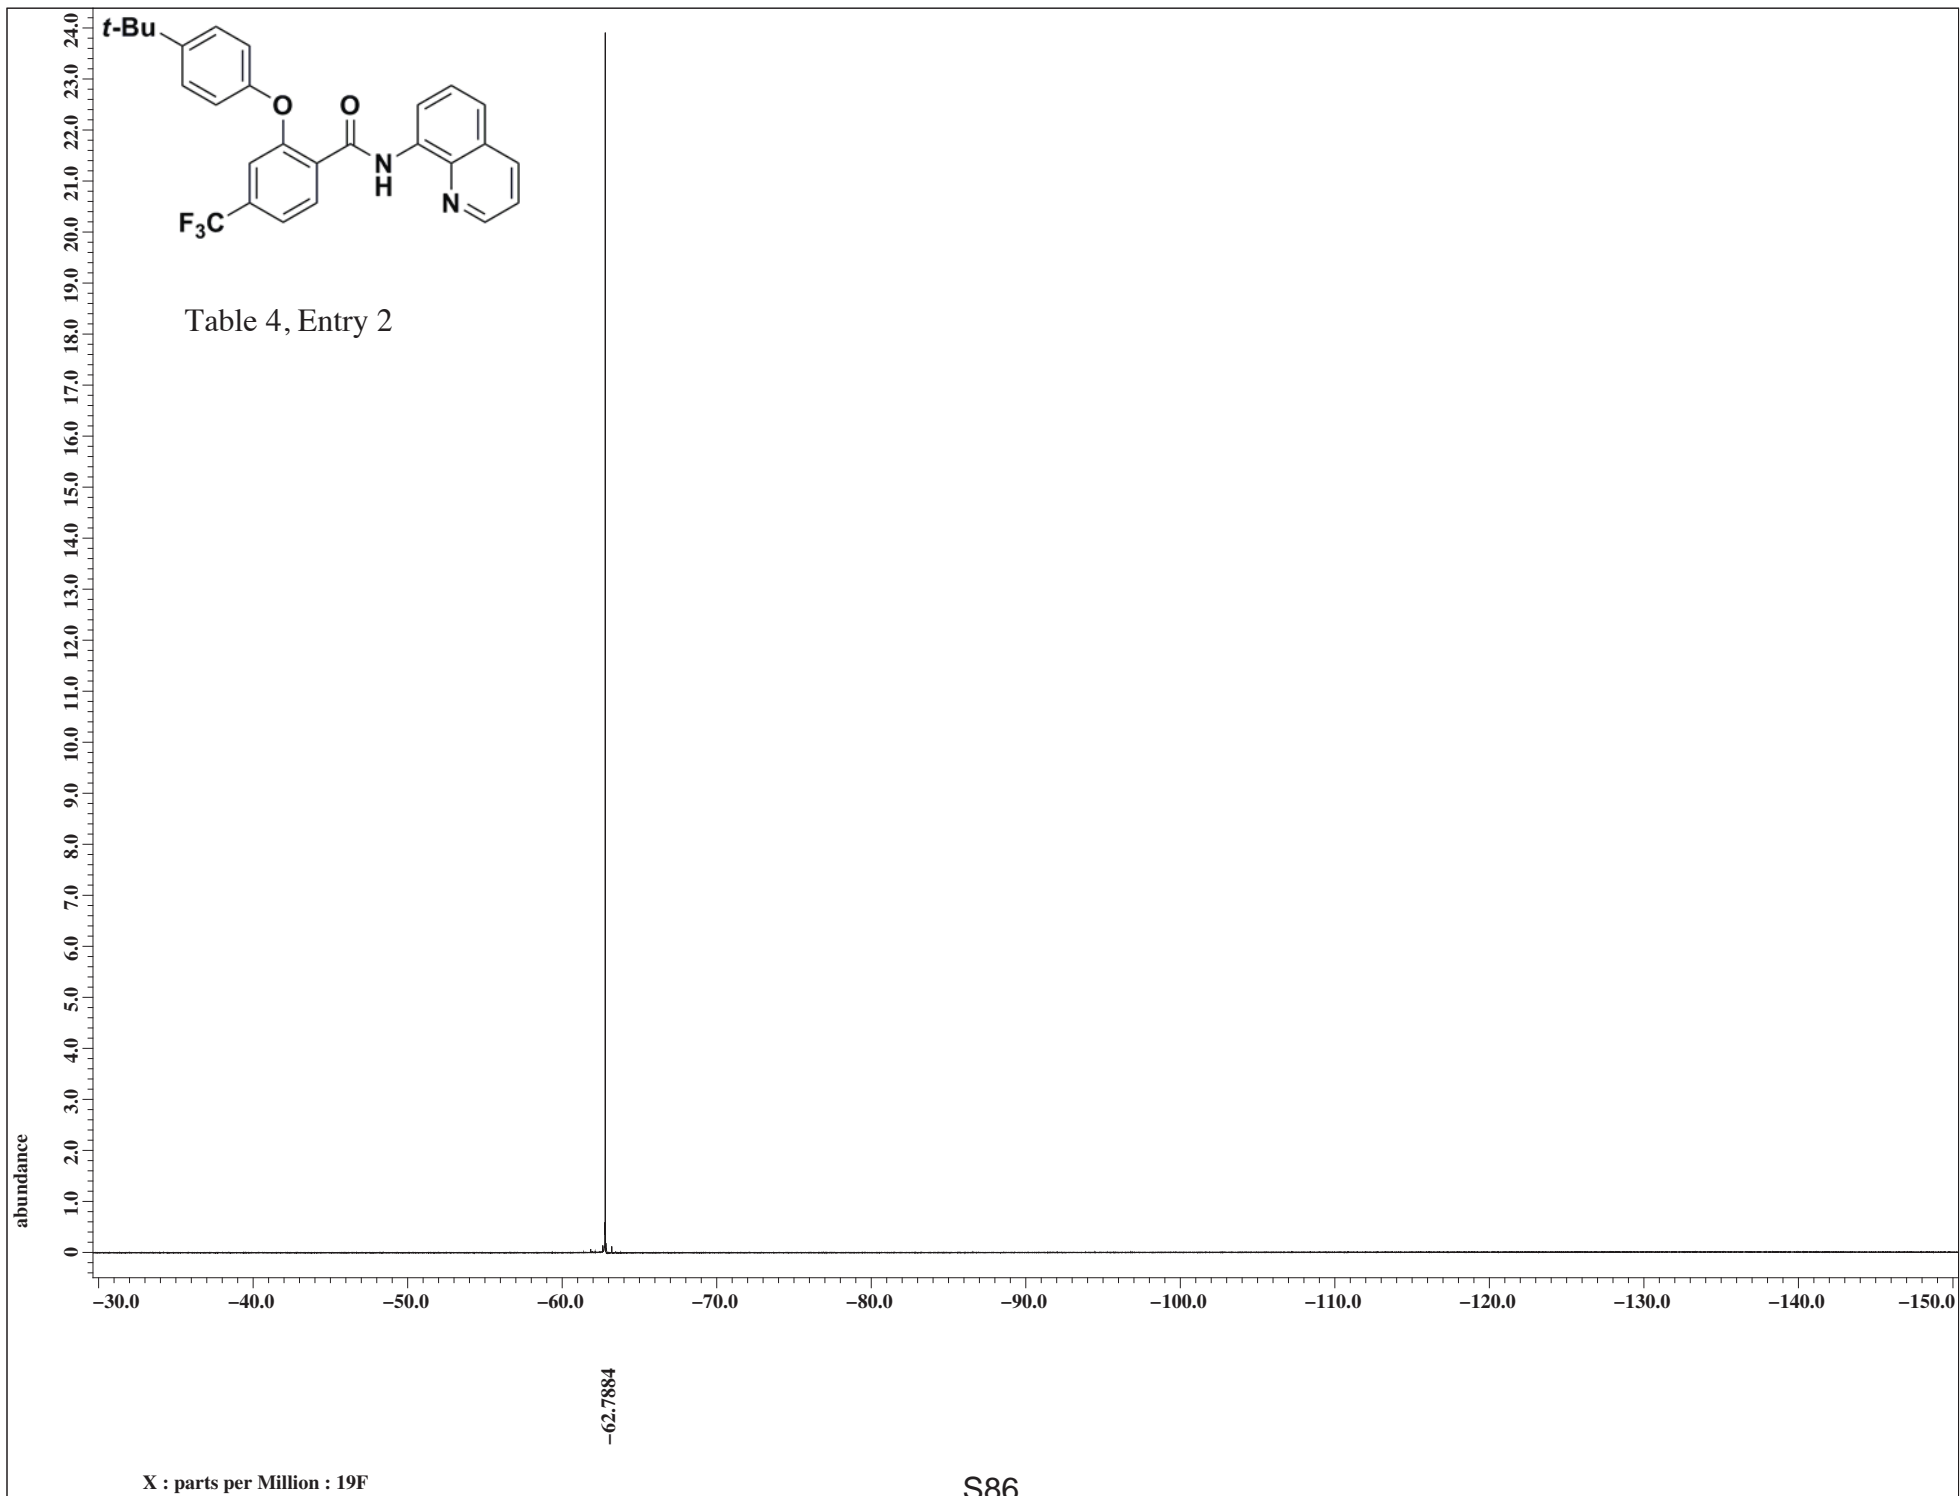

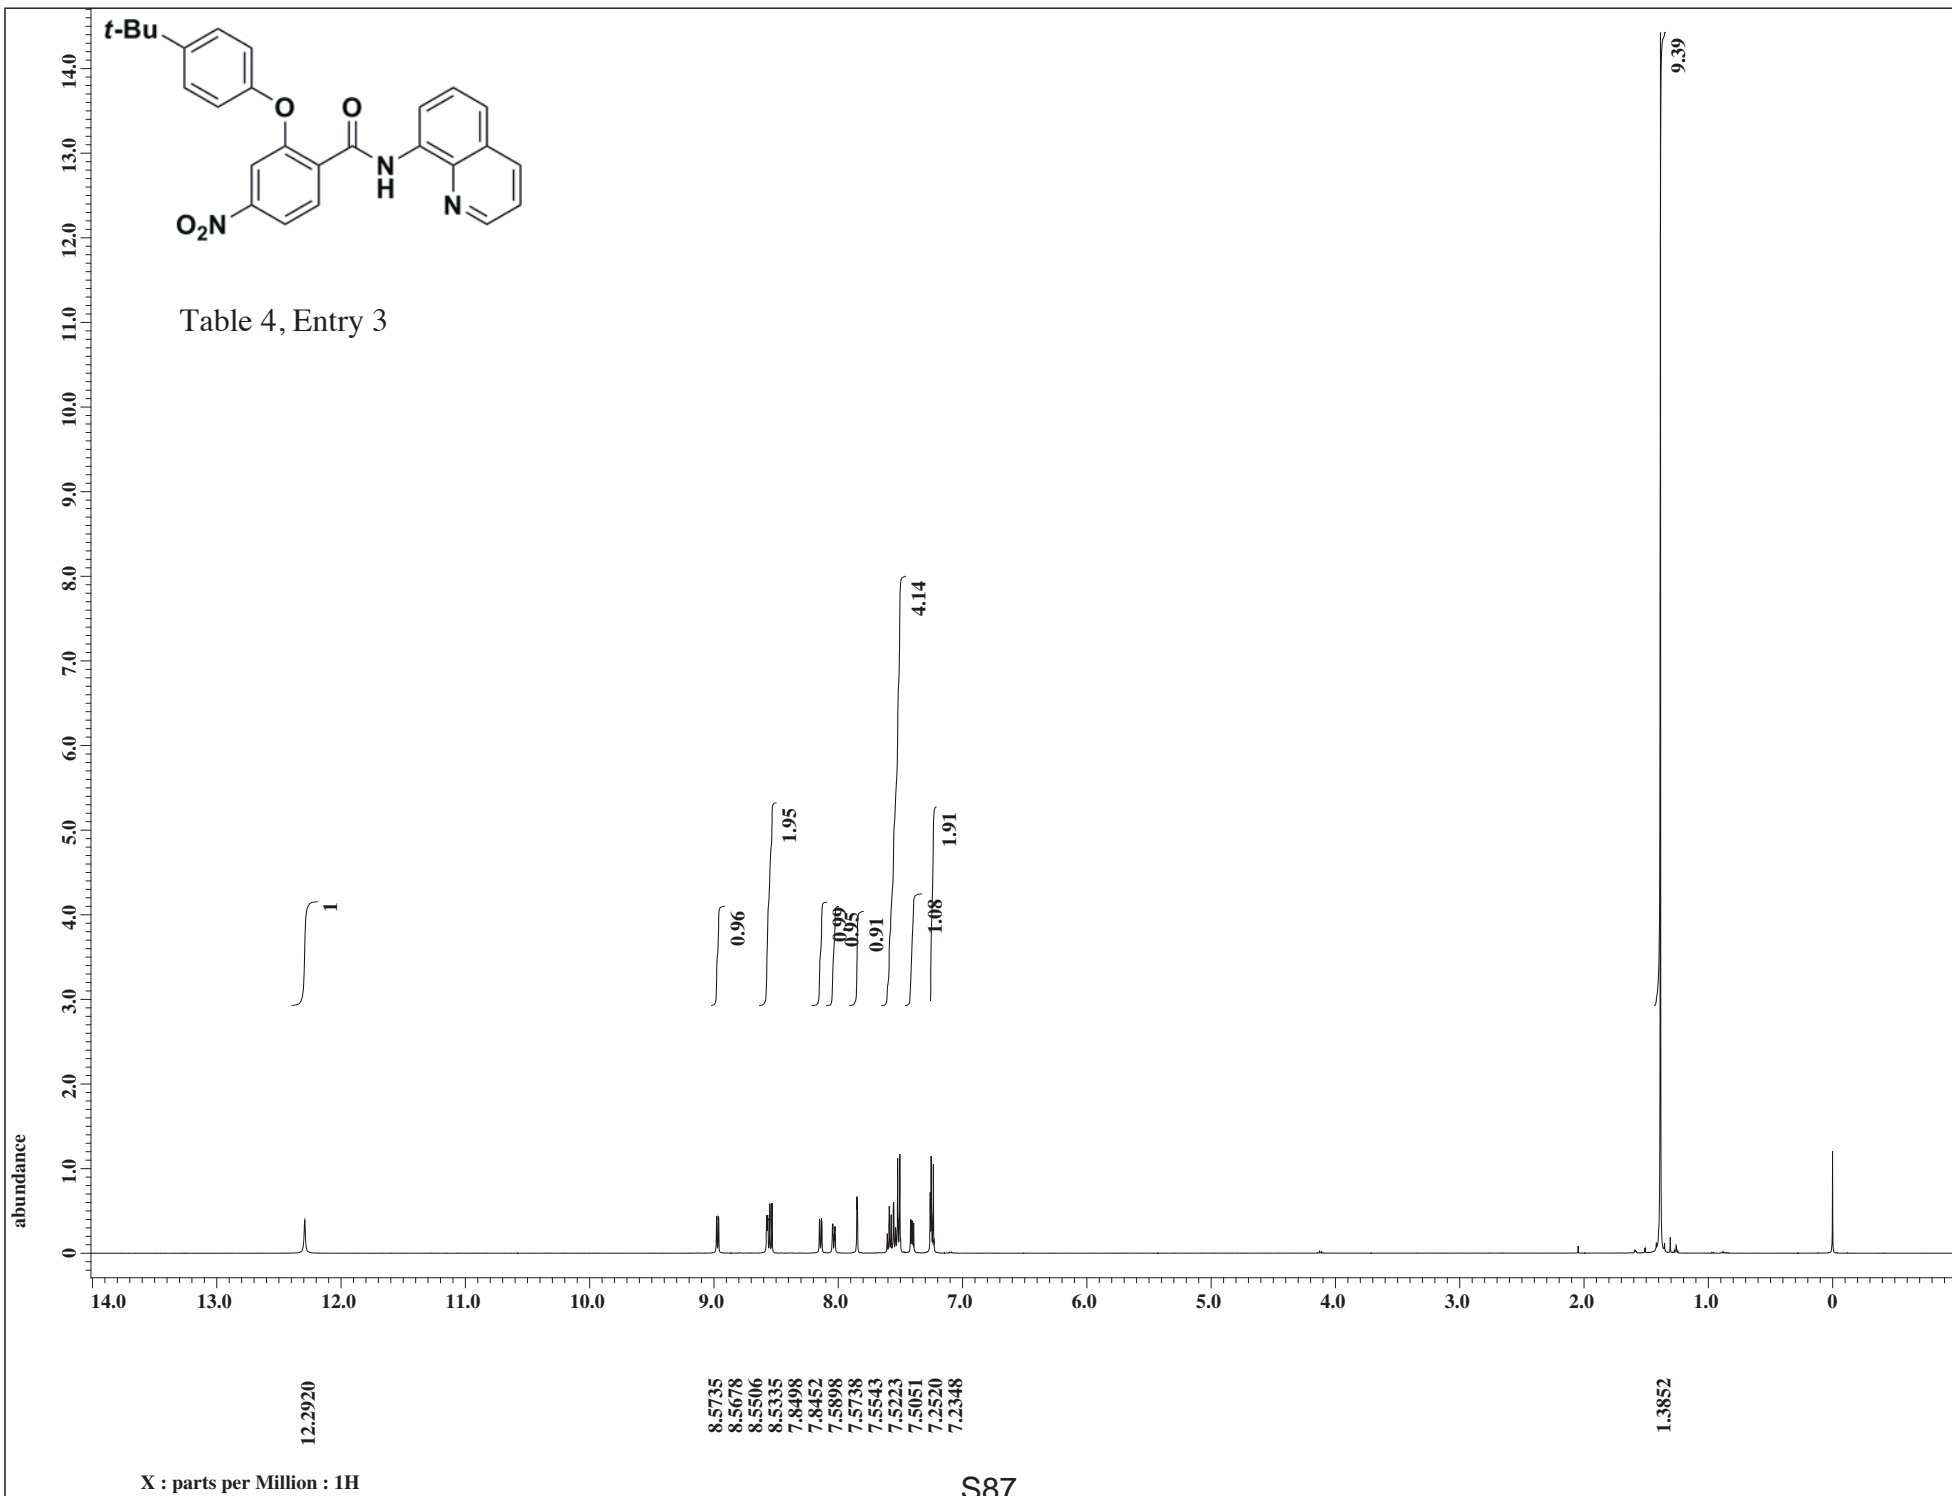

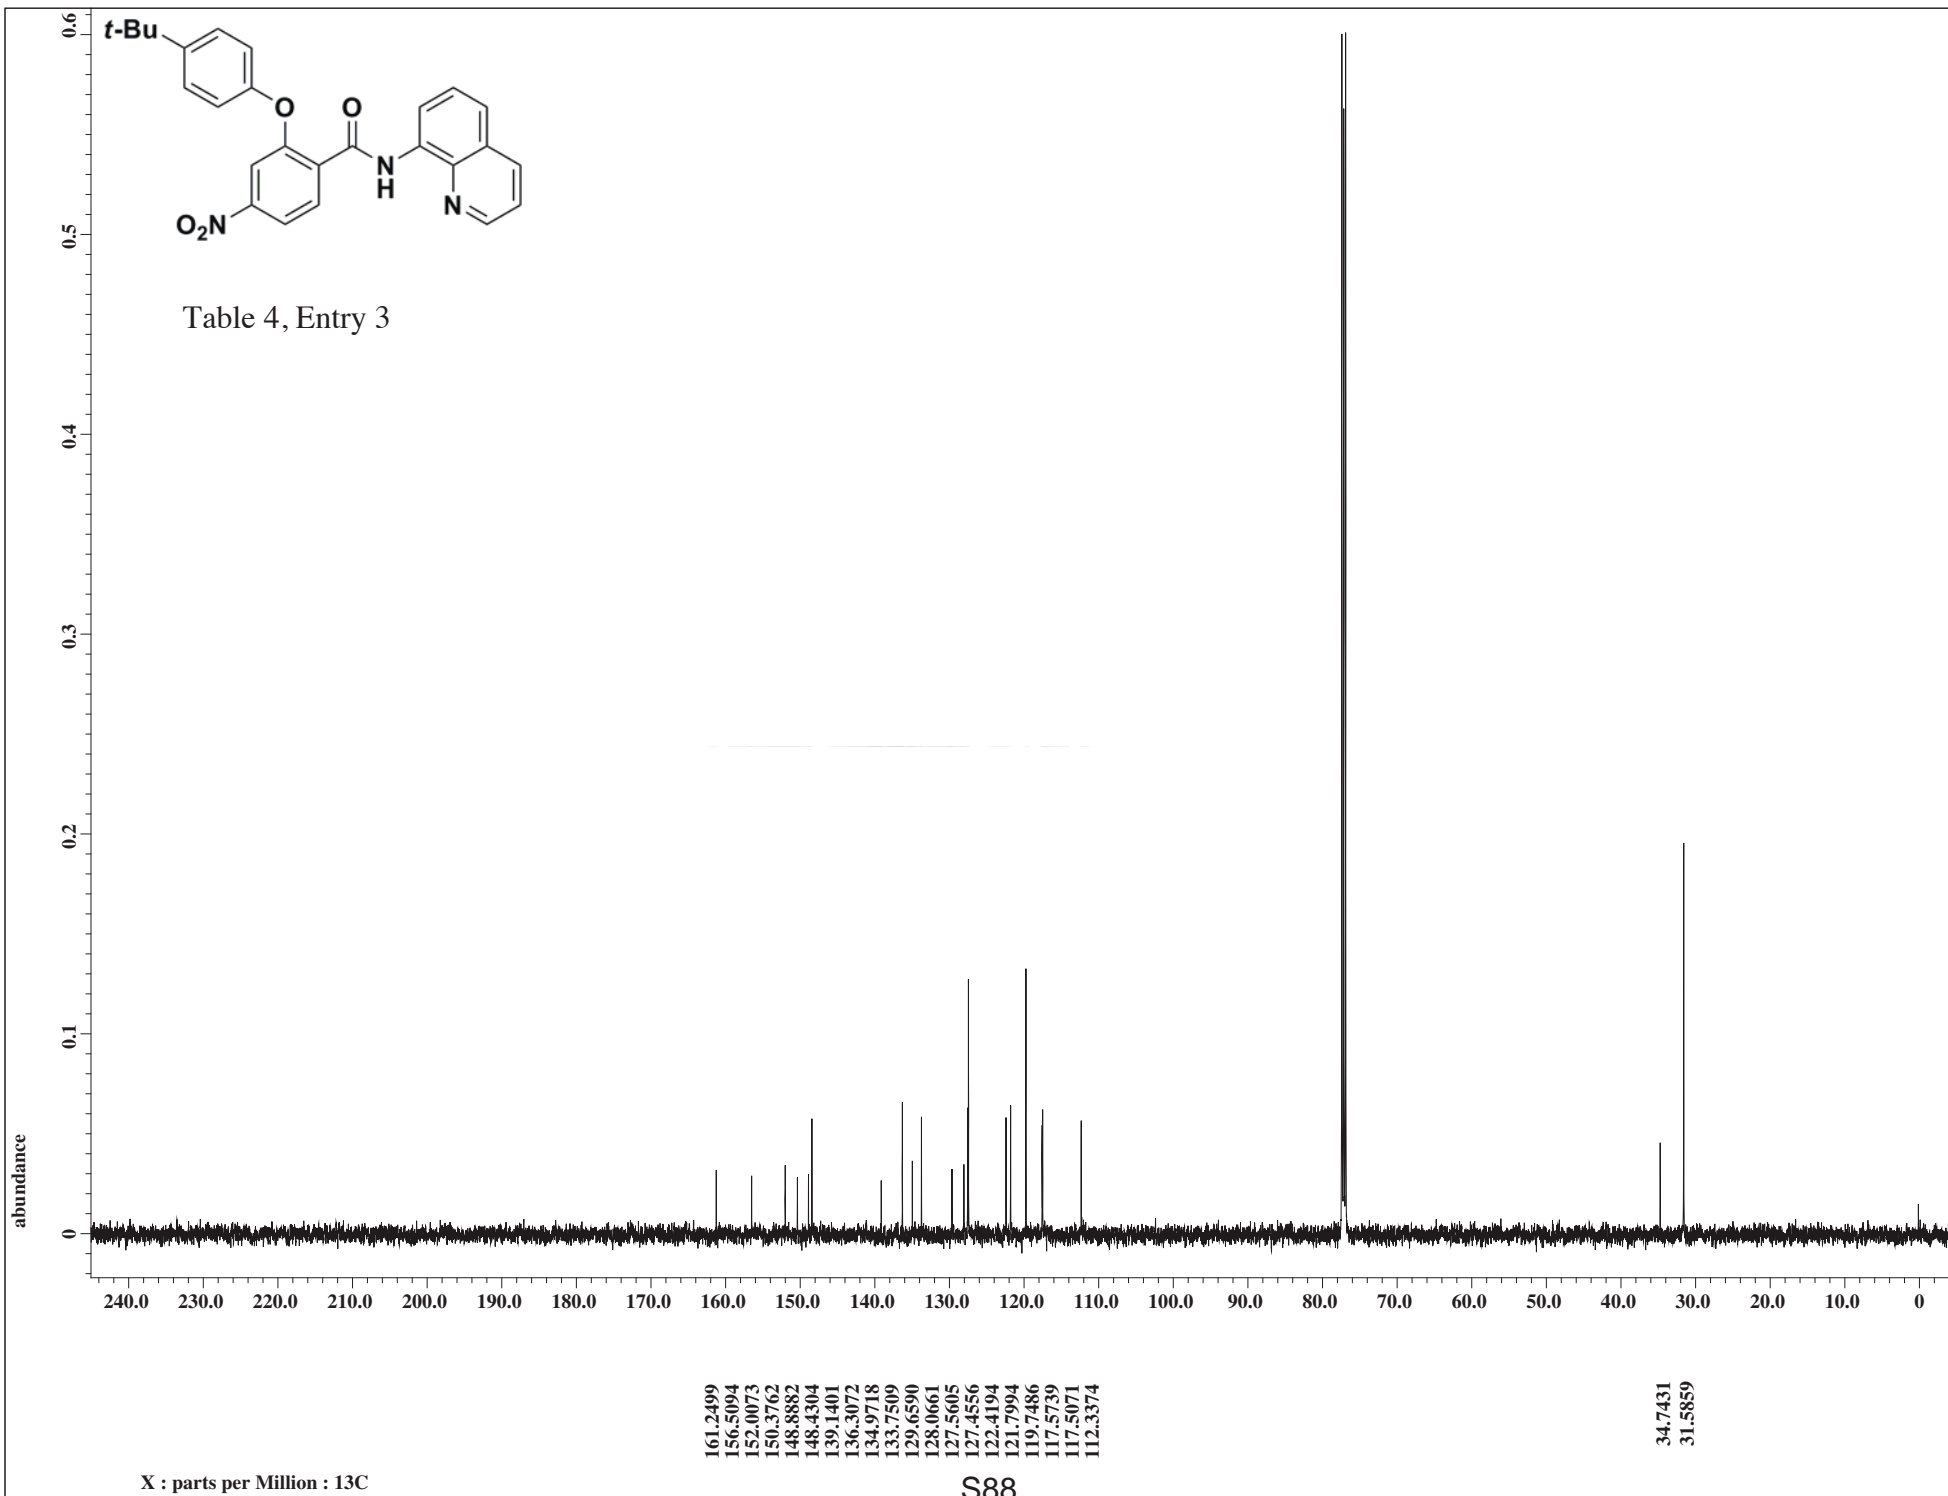



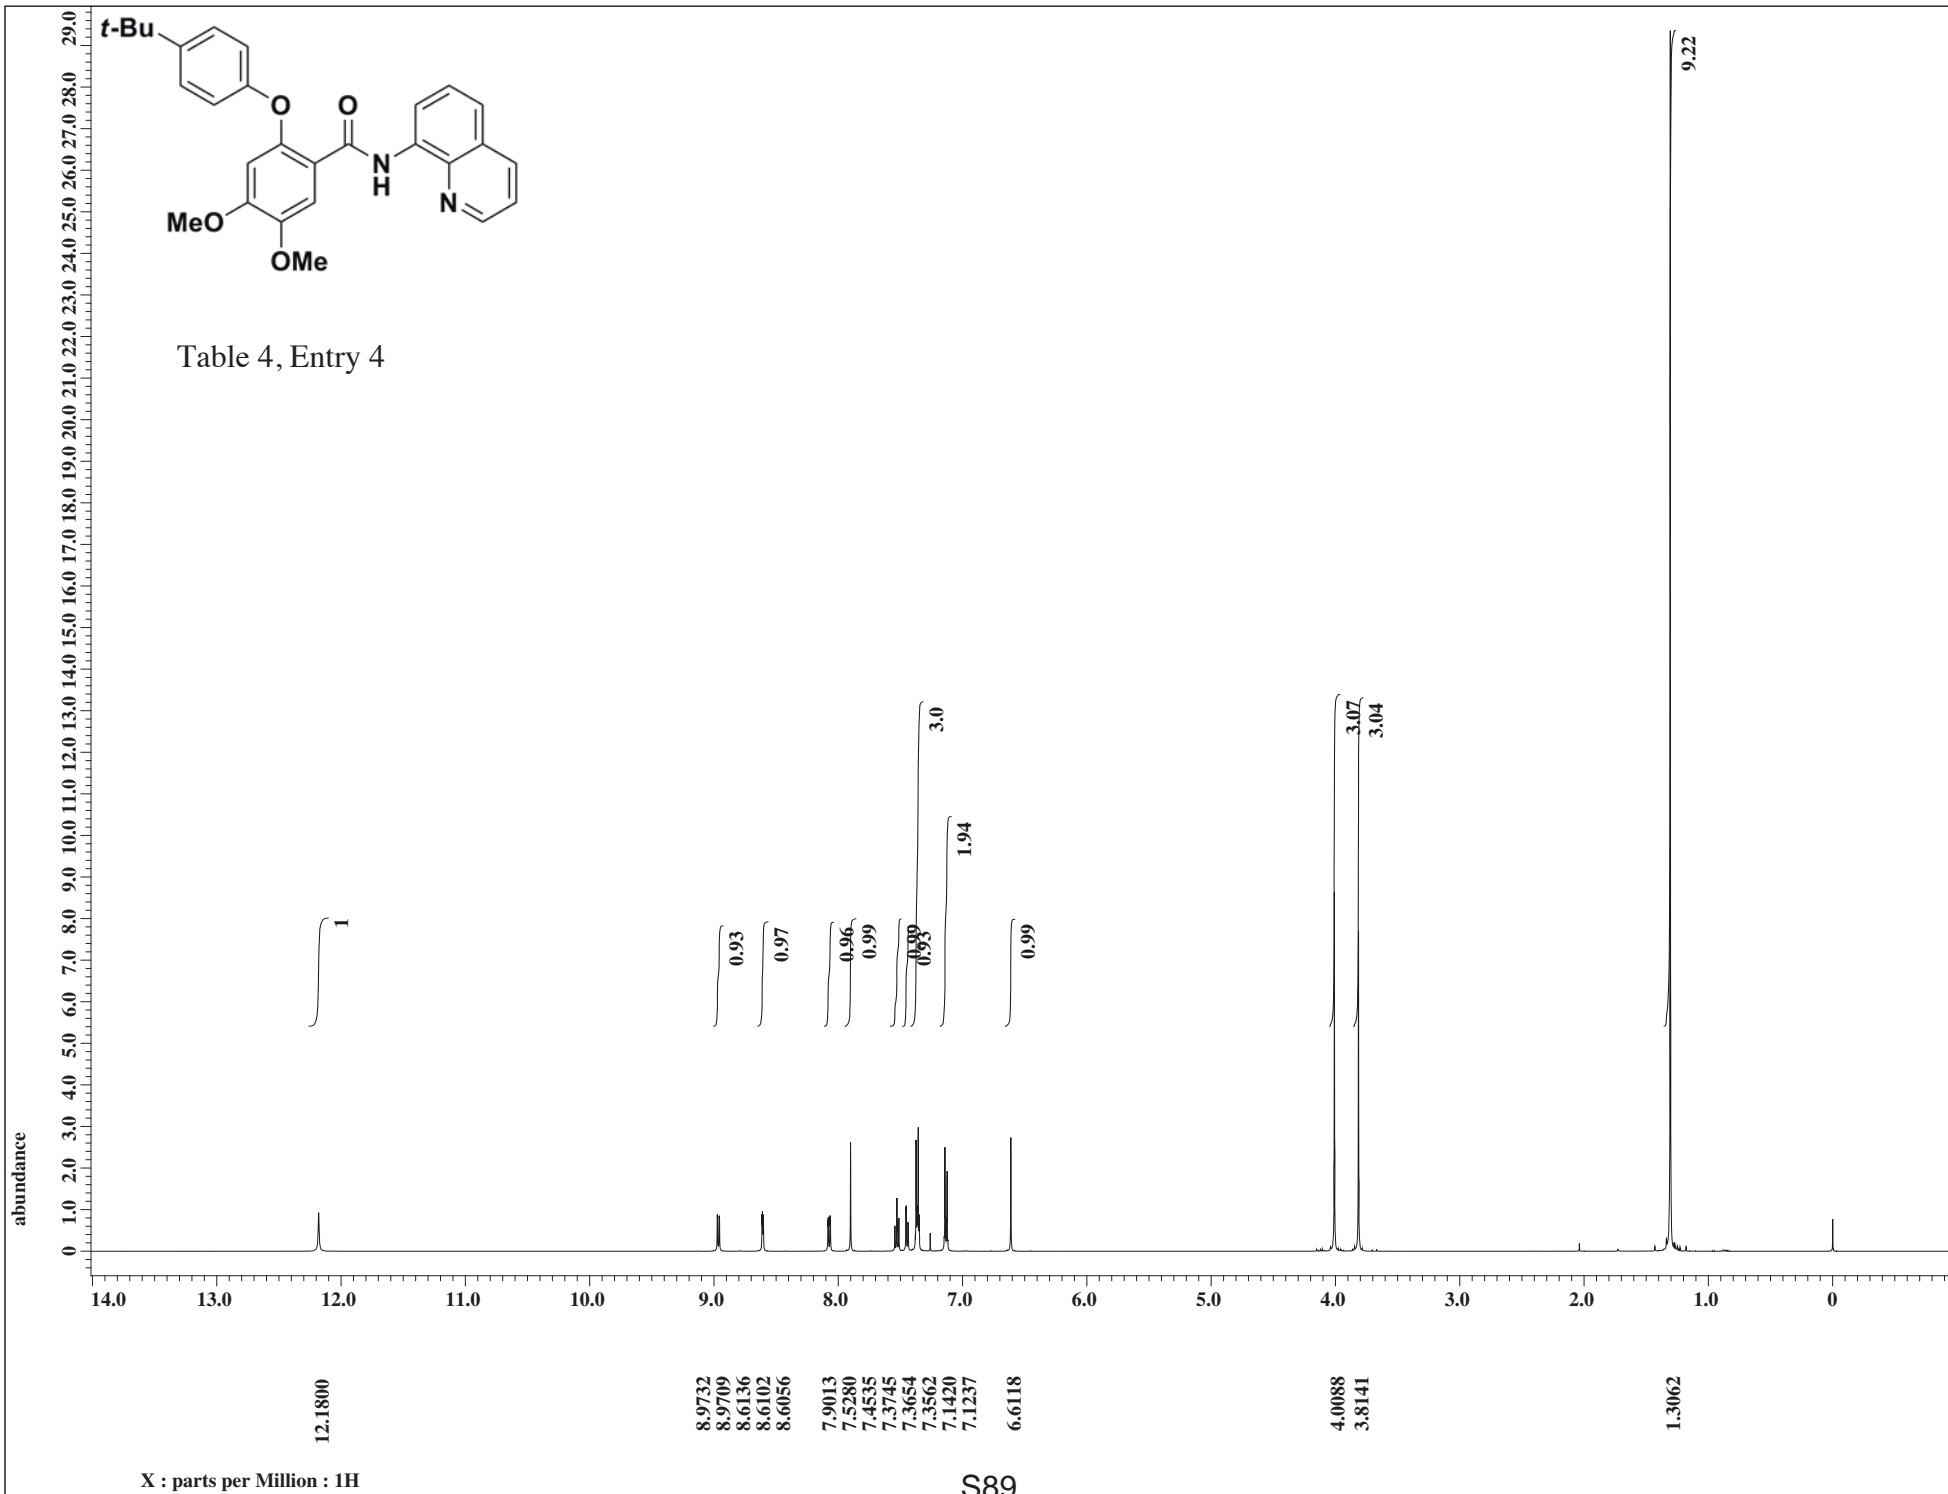

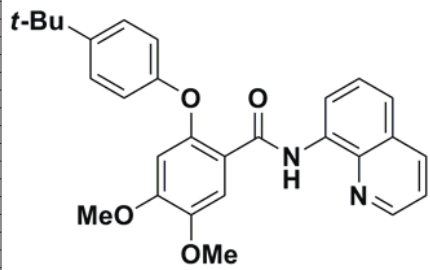

Table 4, Entry 4

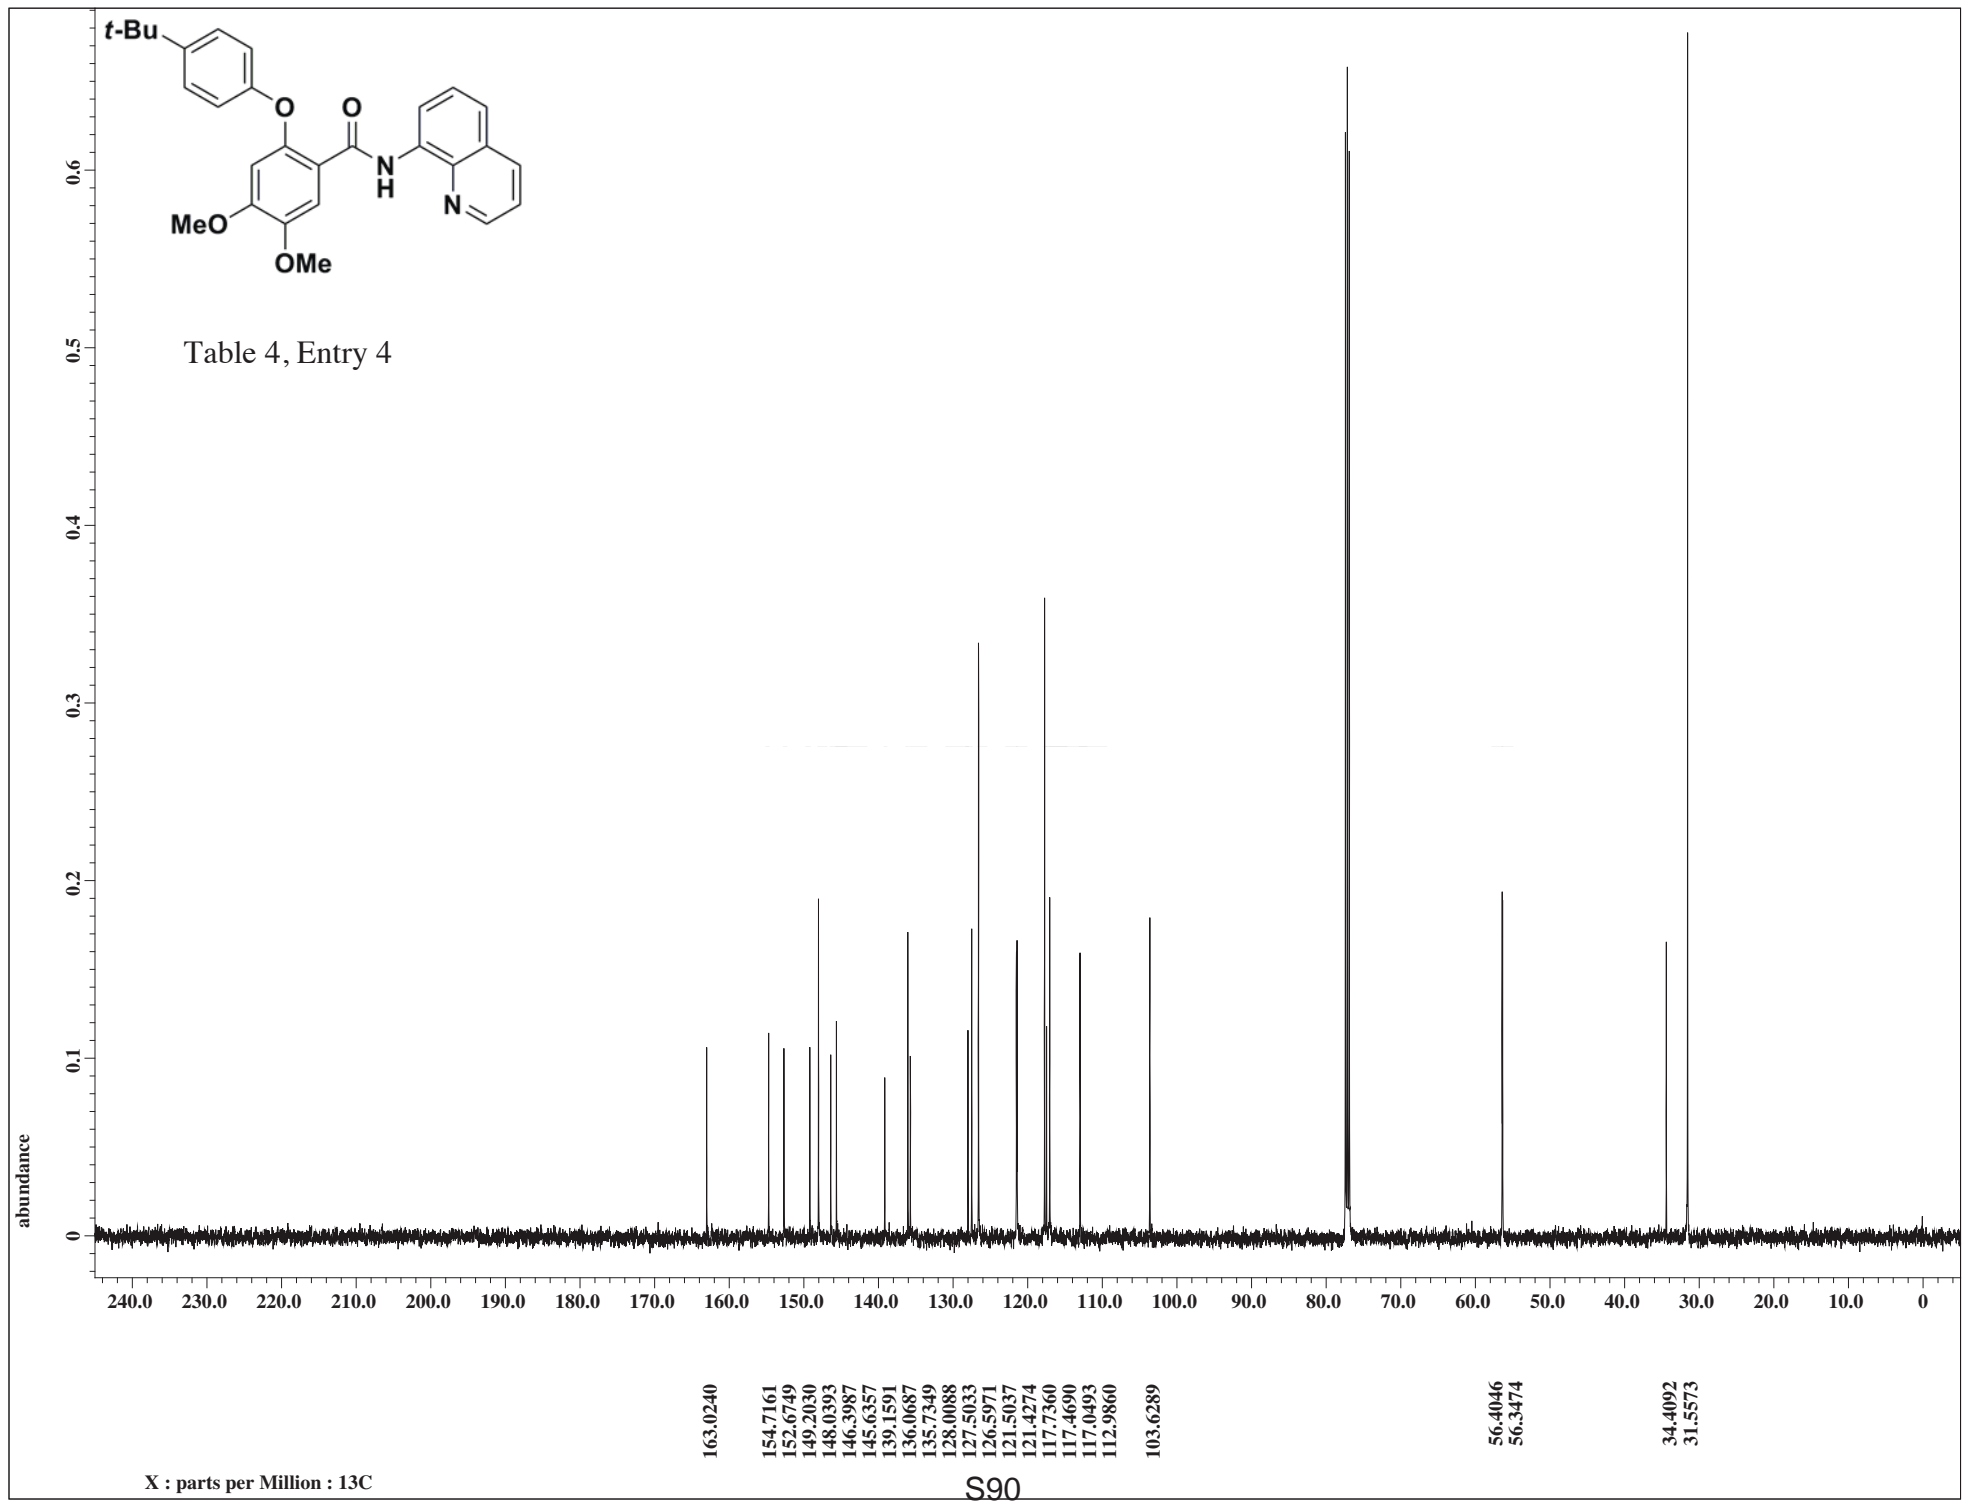

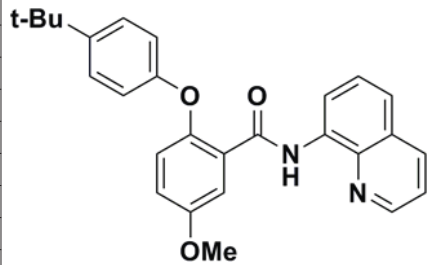

Table 4, Entry 5

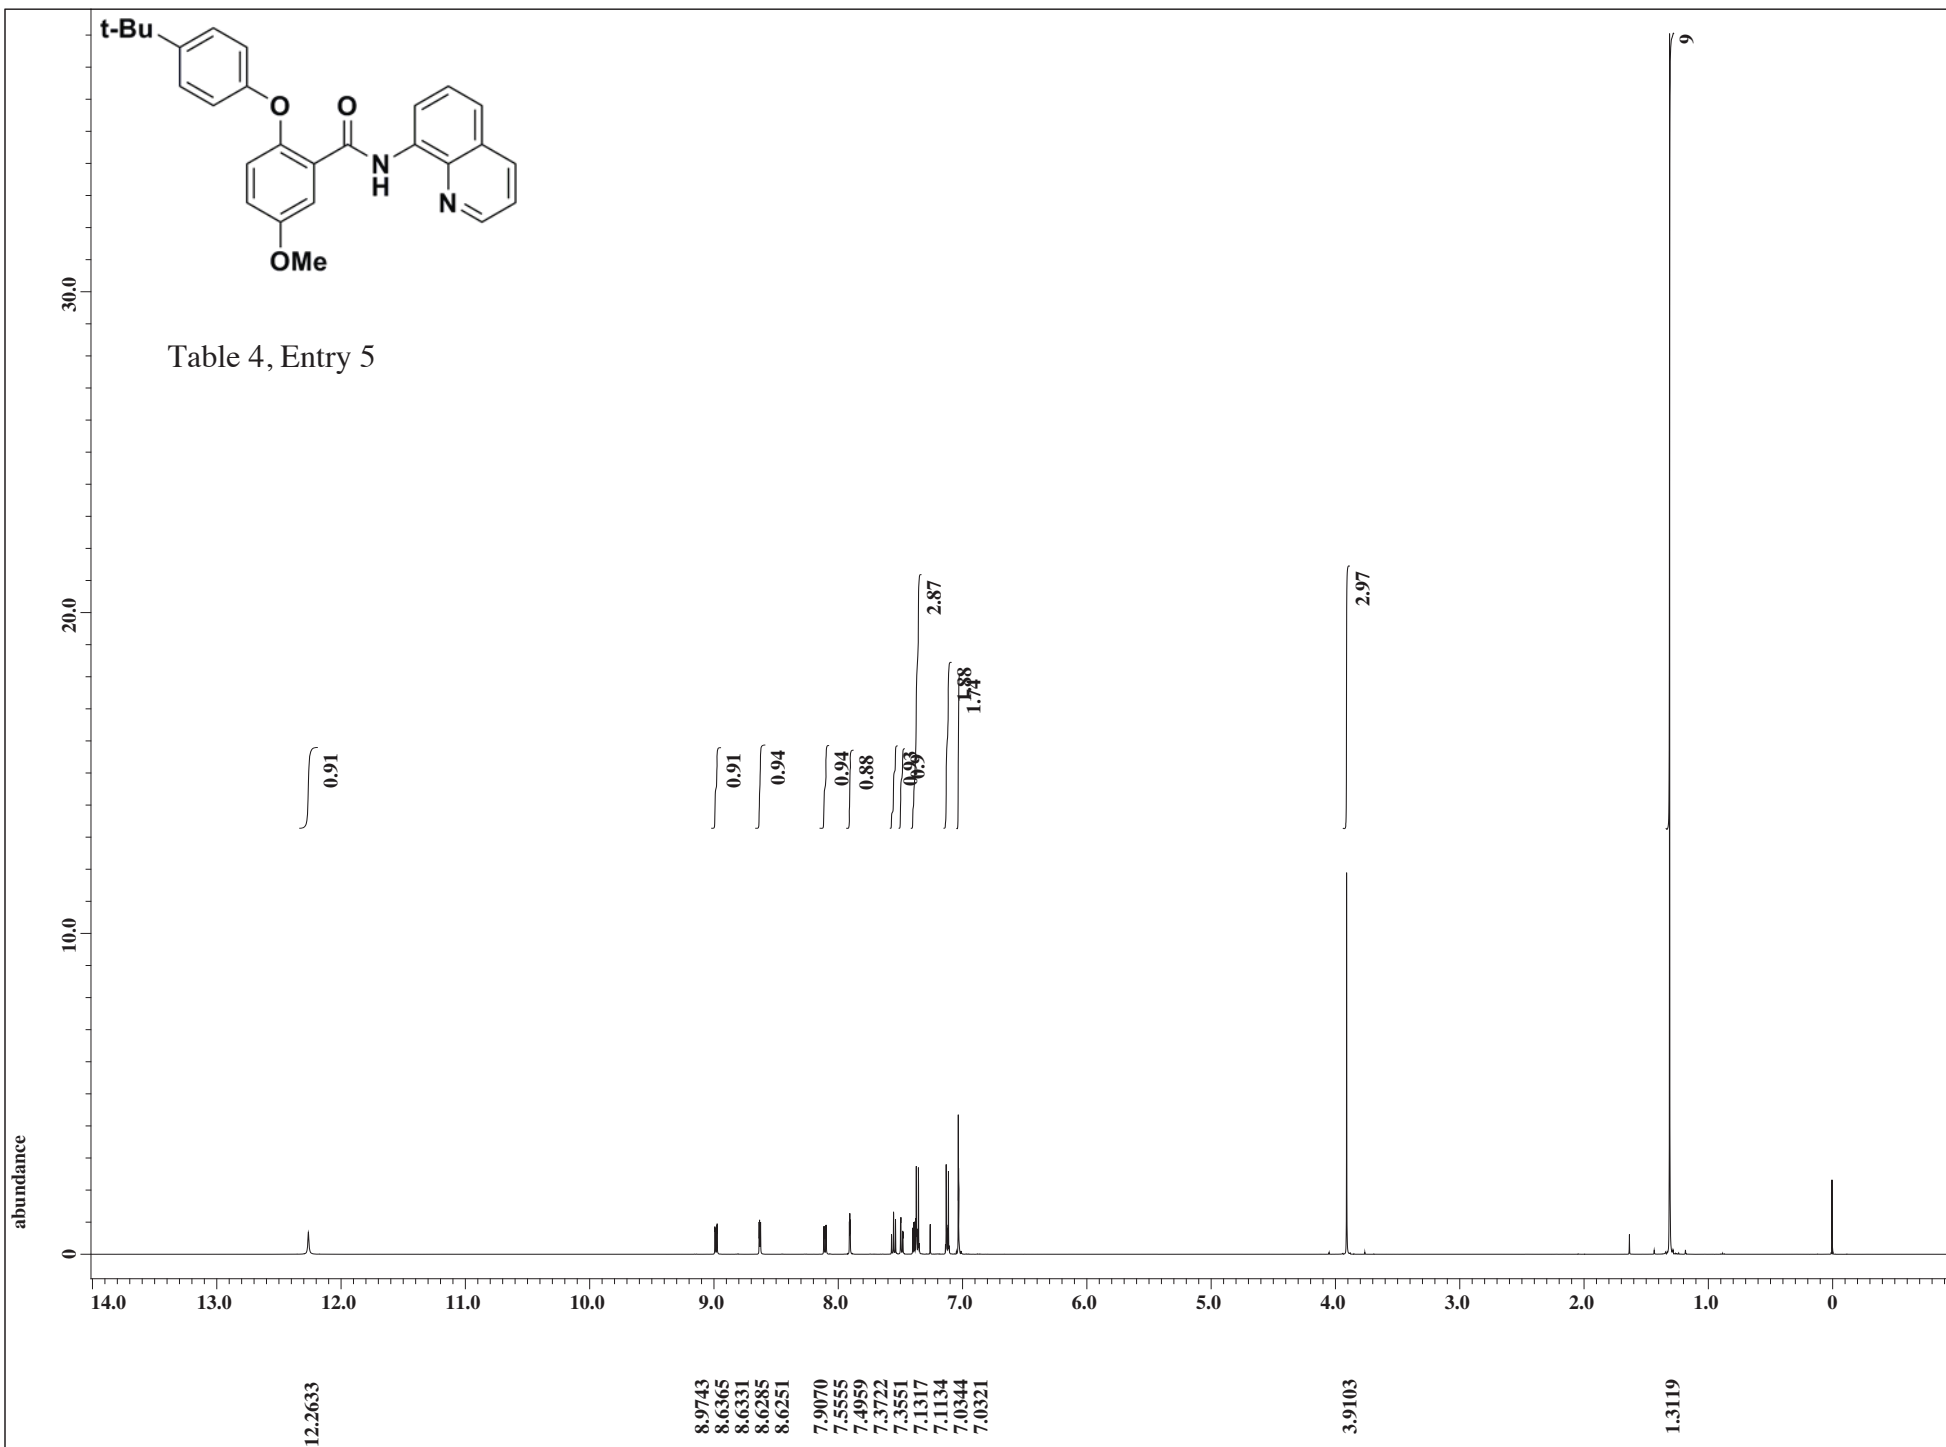

X : parts per Million : 1H

S91

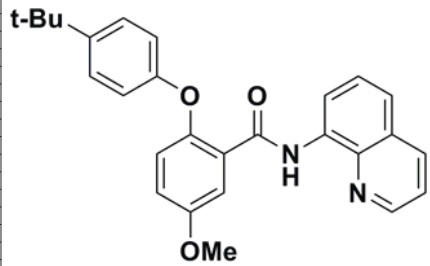

Table 4, Entry 5

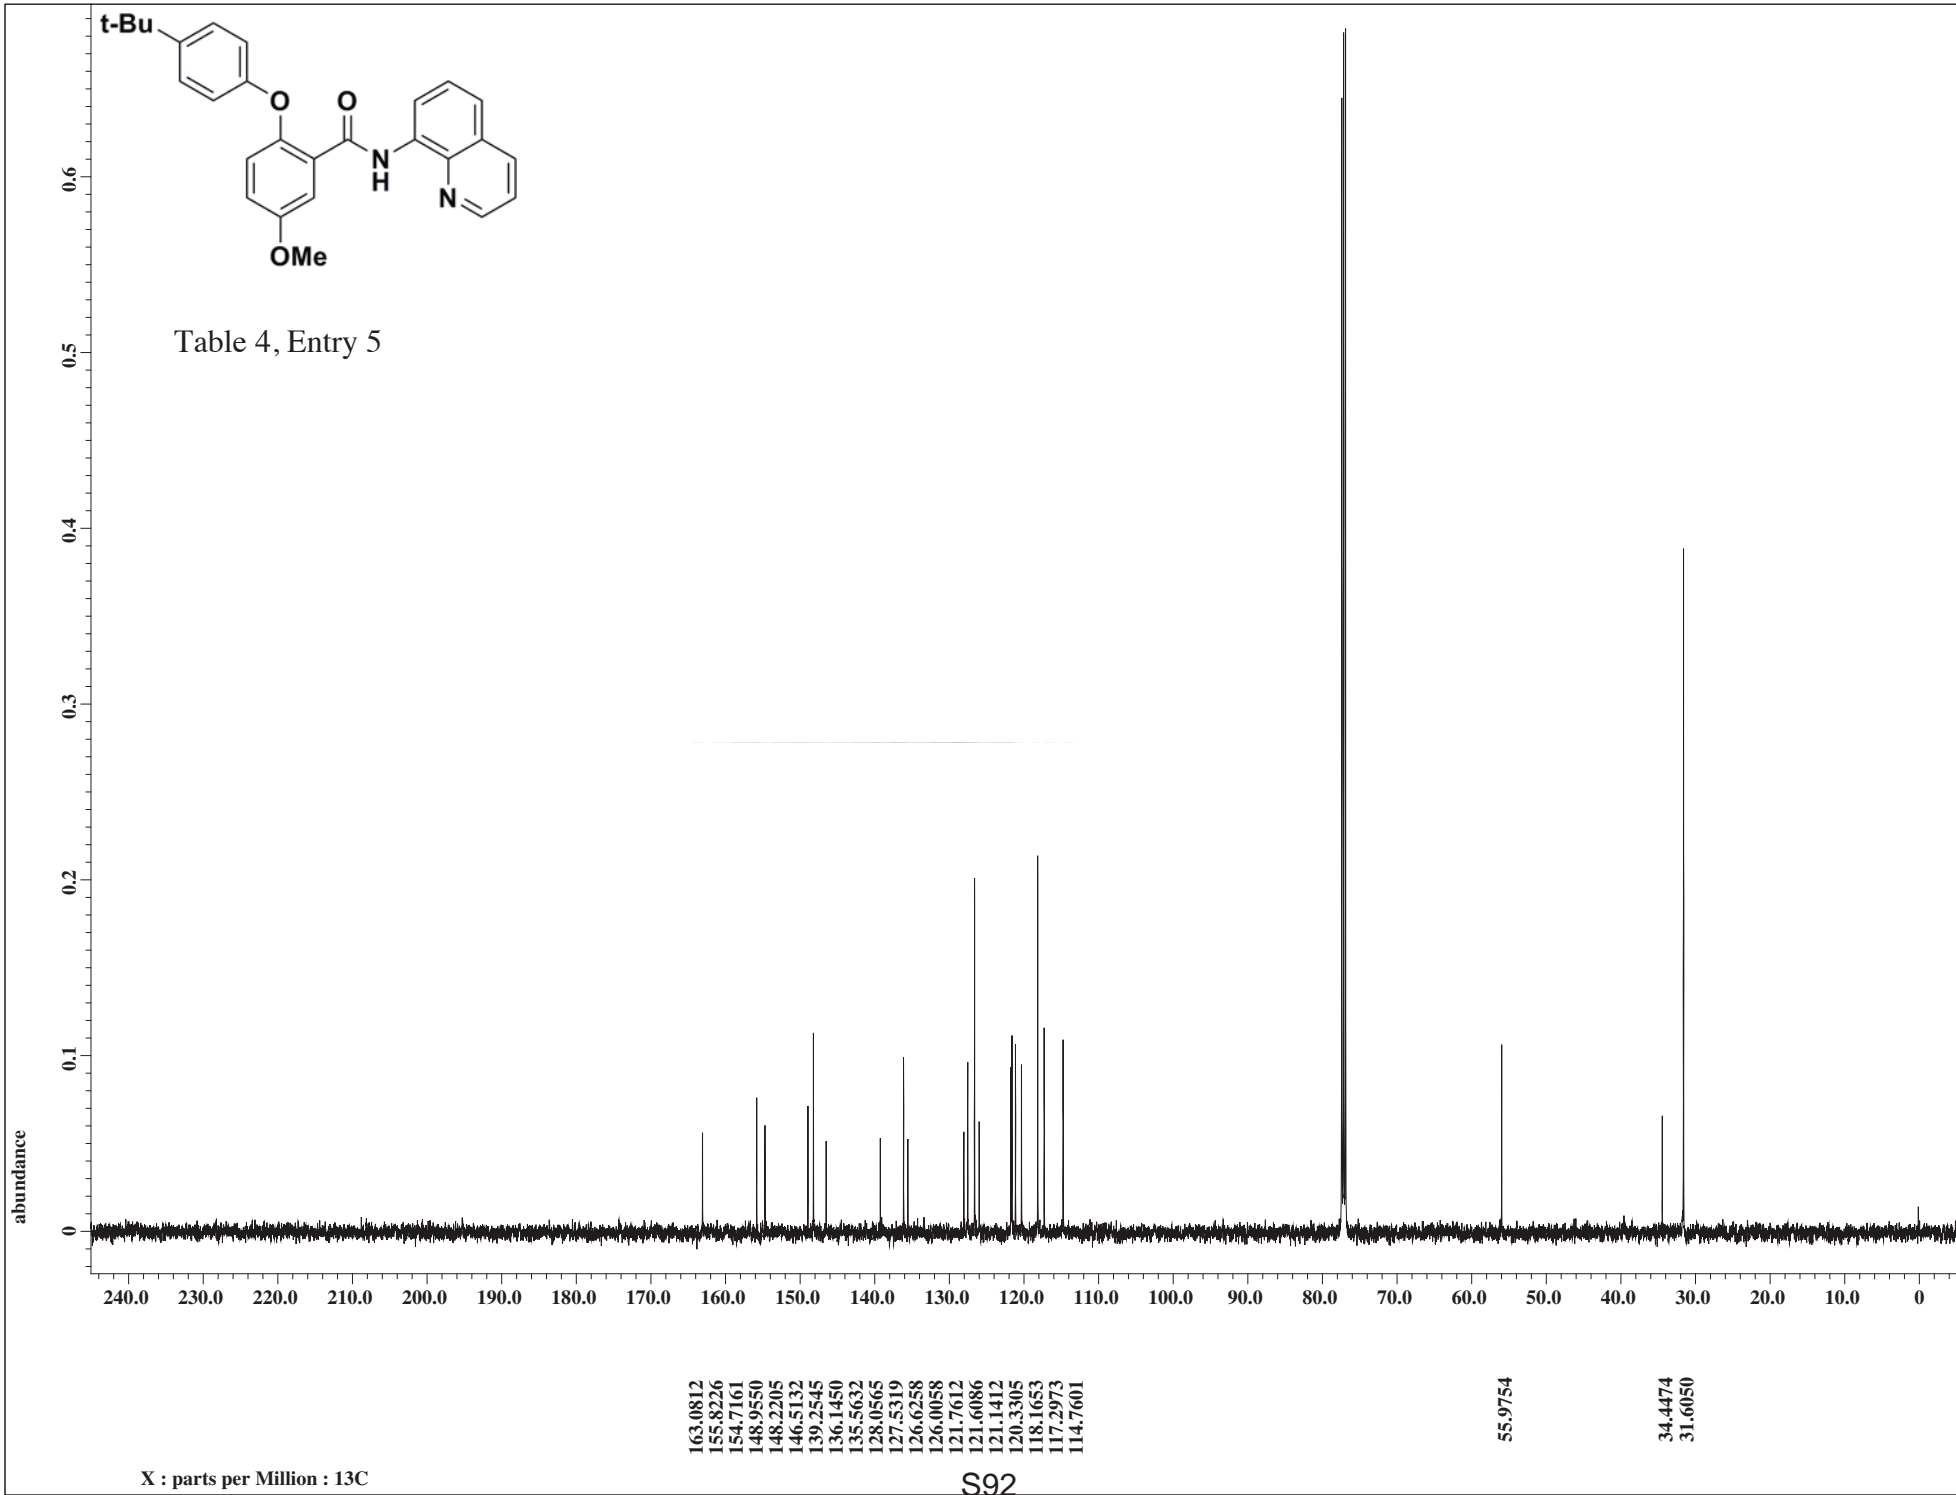

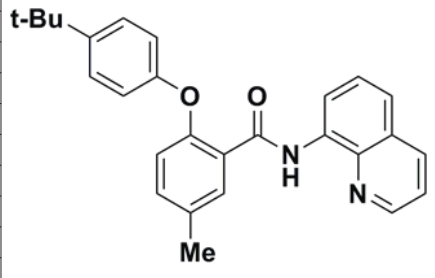

Table 4, Entry 6

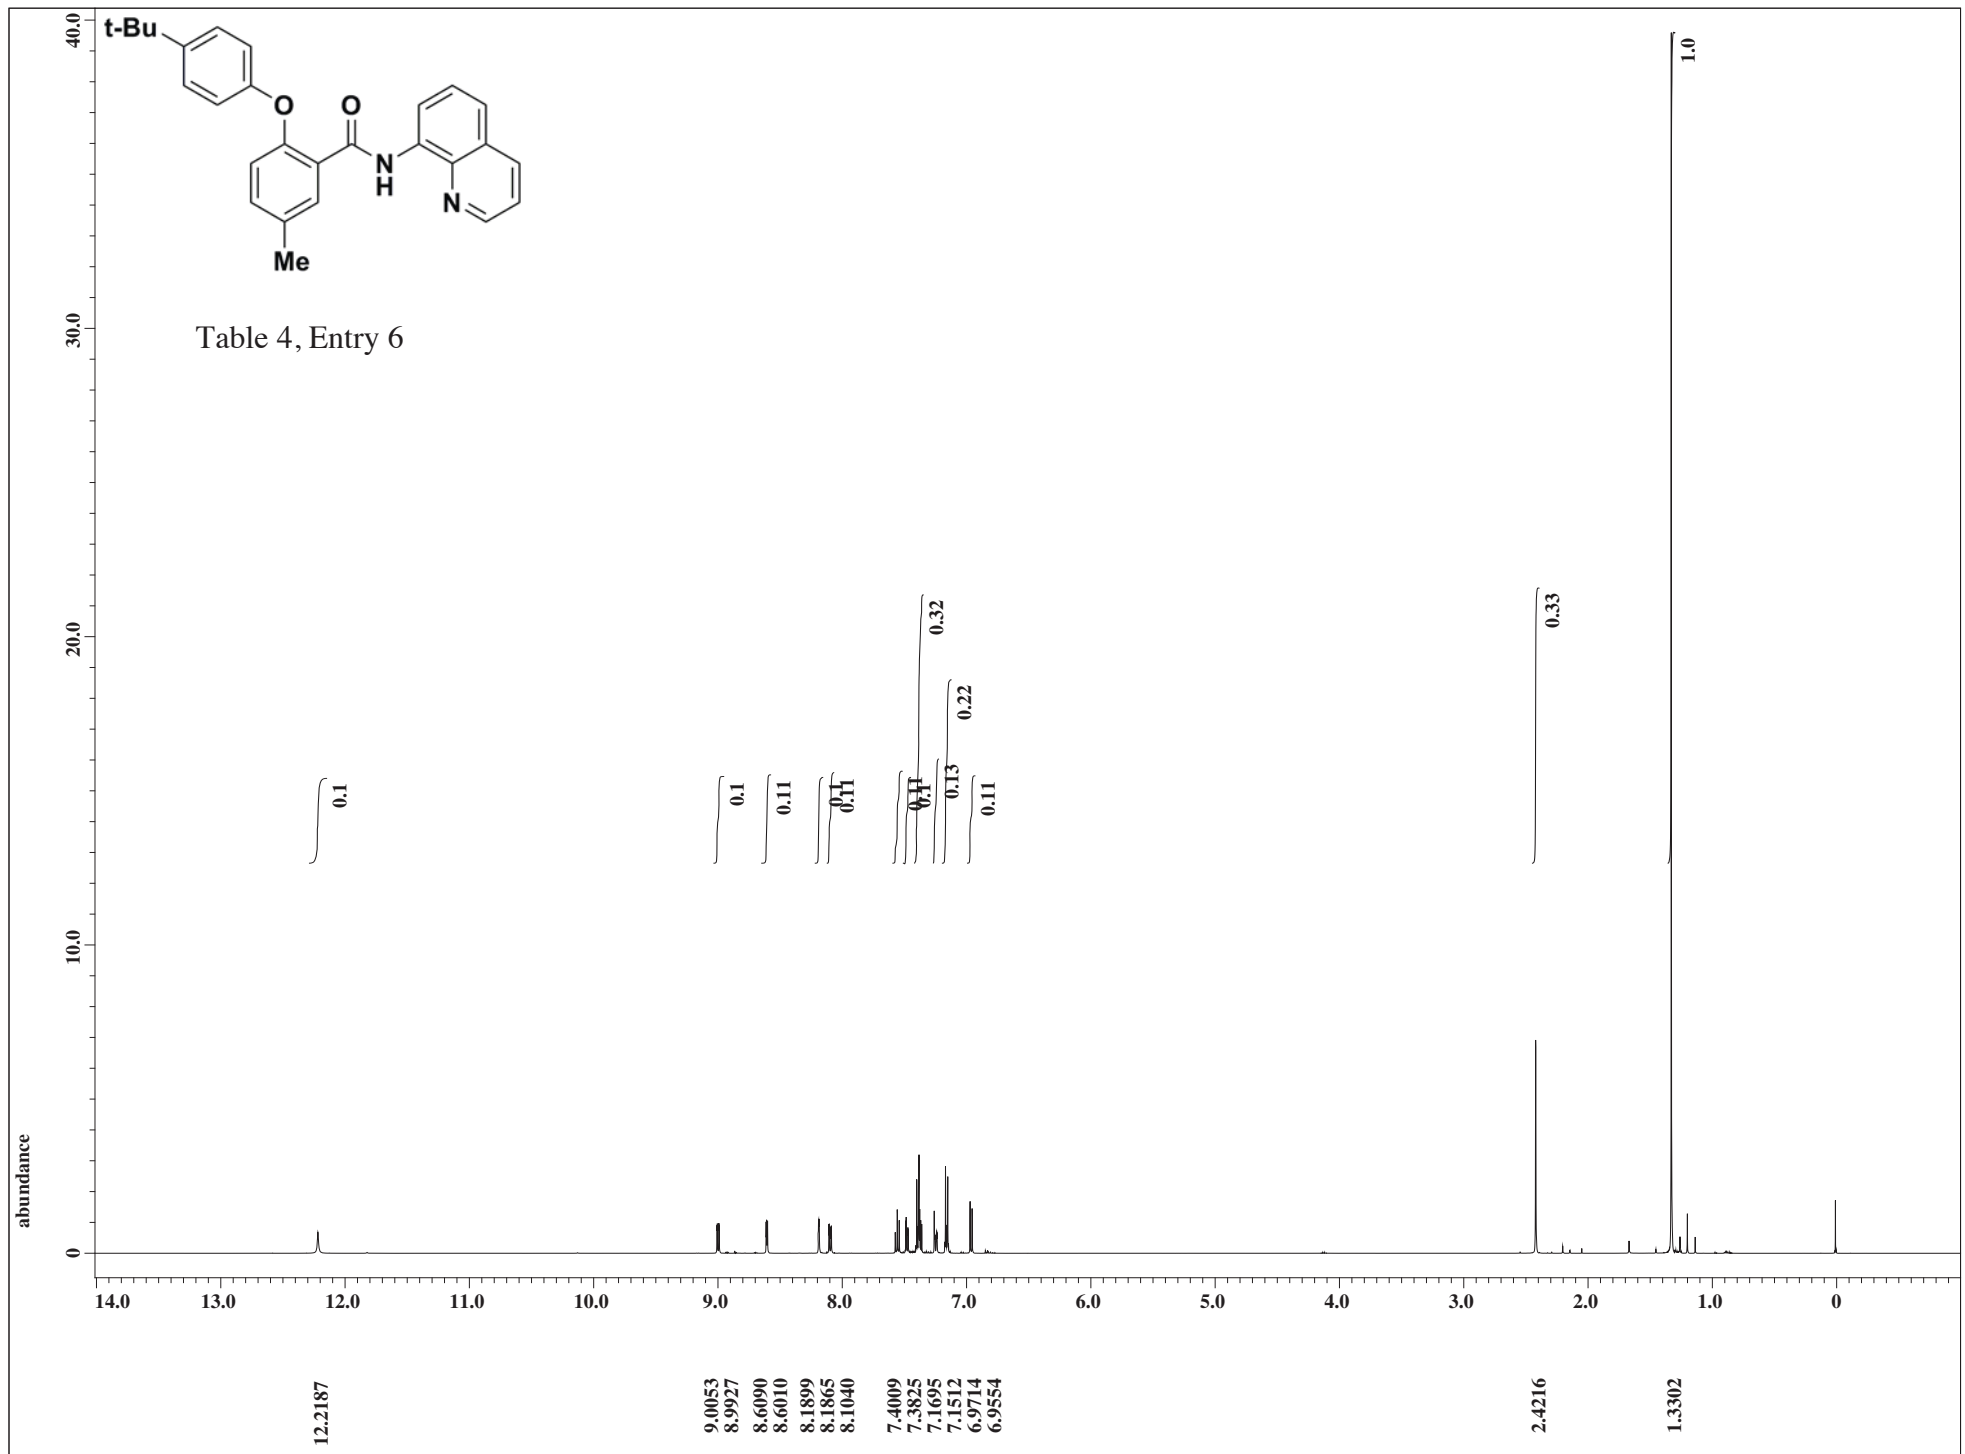

X : parts per Million : 1H

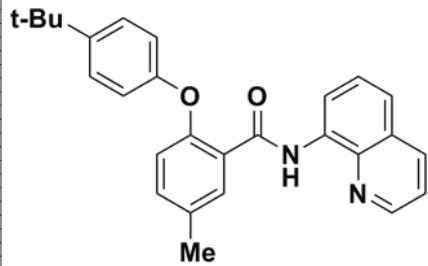

Table 4, Entry 6

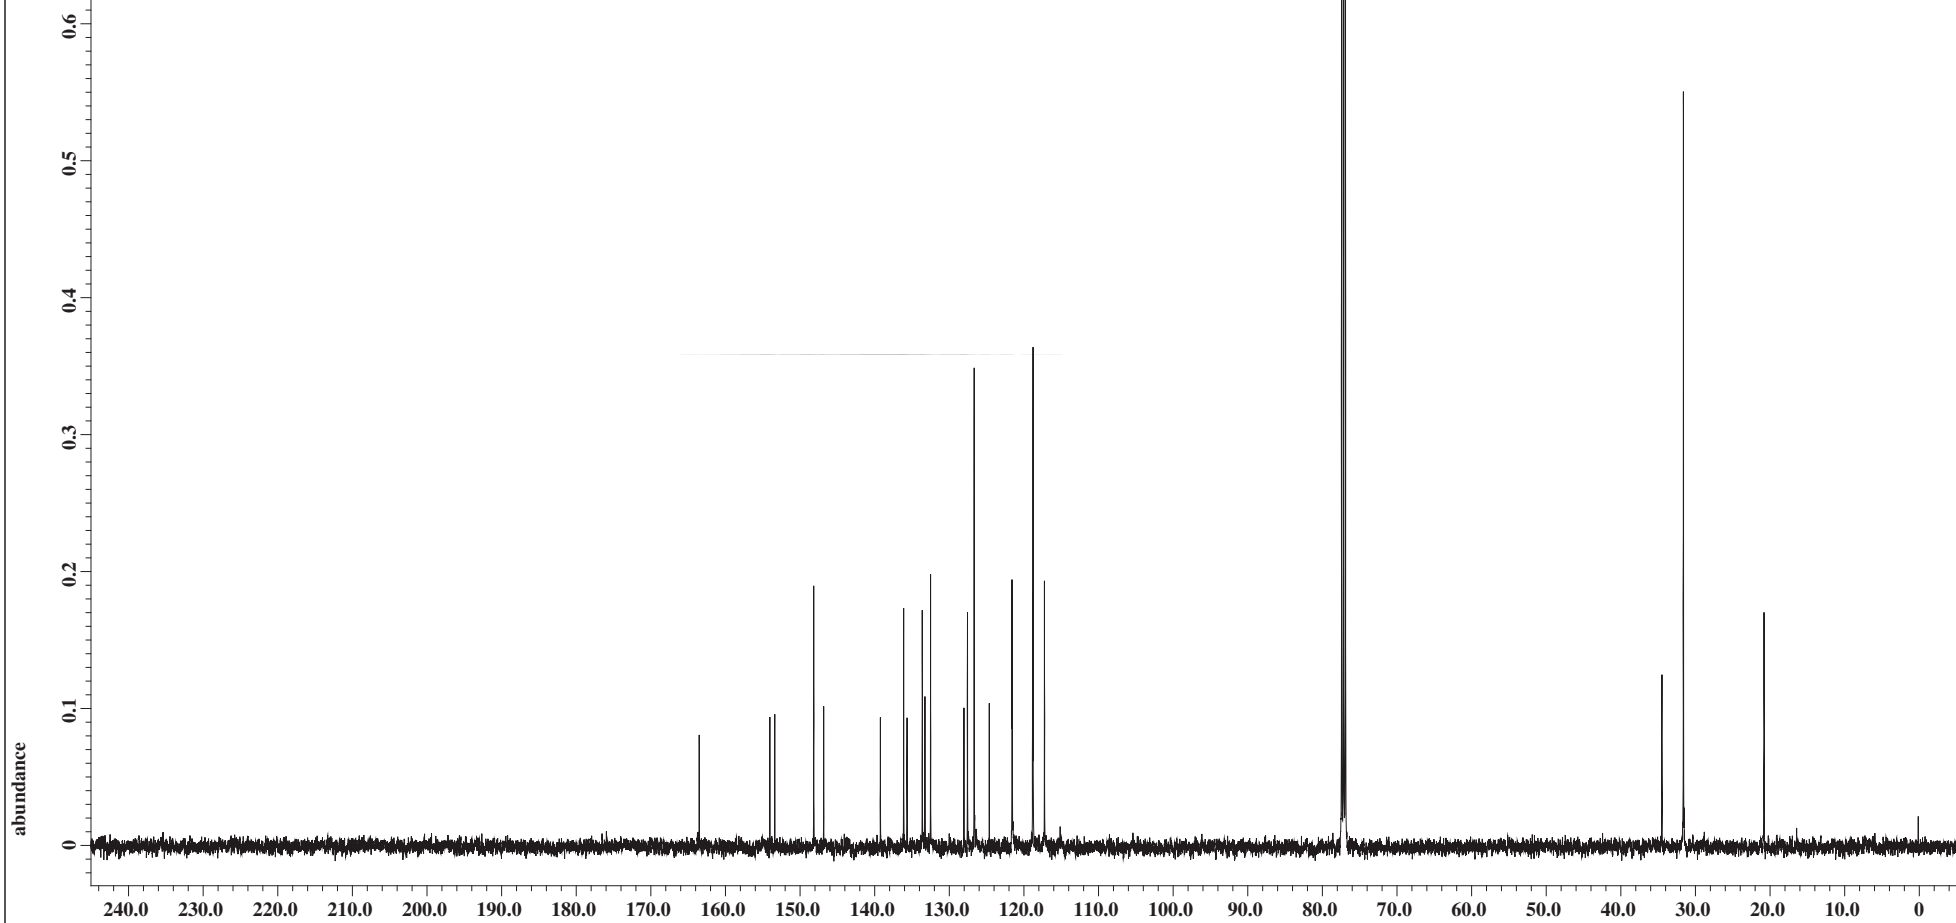

163.5200  
 154.0485  
 153.3903  
 148.1729  
 146.8375  
 139.2354  
 136.1164  
 135.6586  
 133.6269  
 133.2645  
 132.5109  
 128.0374  
 127.5605  
 126.6639  
 124.6418  
 121.5991  
 121.5514  
 118.8425  
 118.7757  
 117.2496

34.4855  
 31.6145  
 20.8076

X : parts per Million : 13C

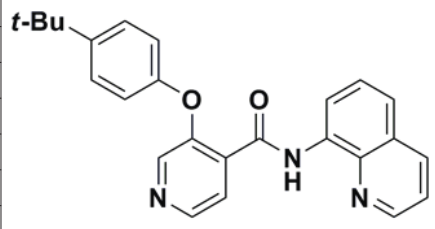

Table 4, Entry 7

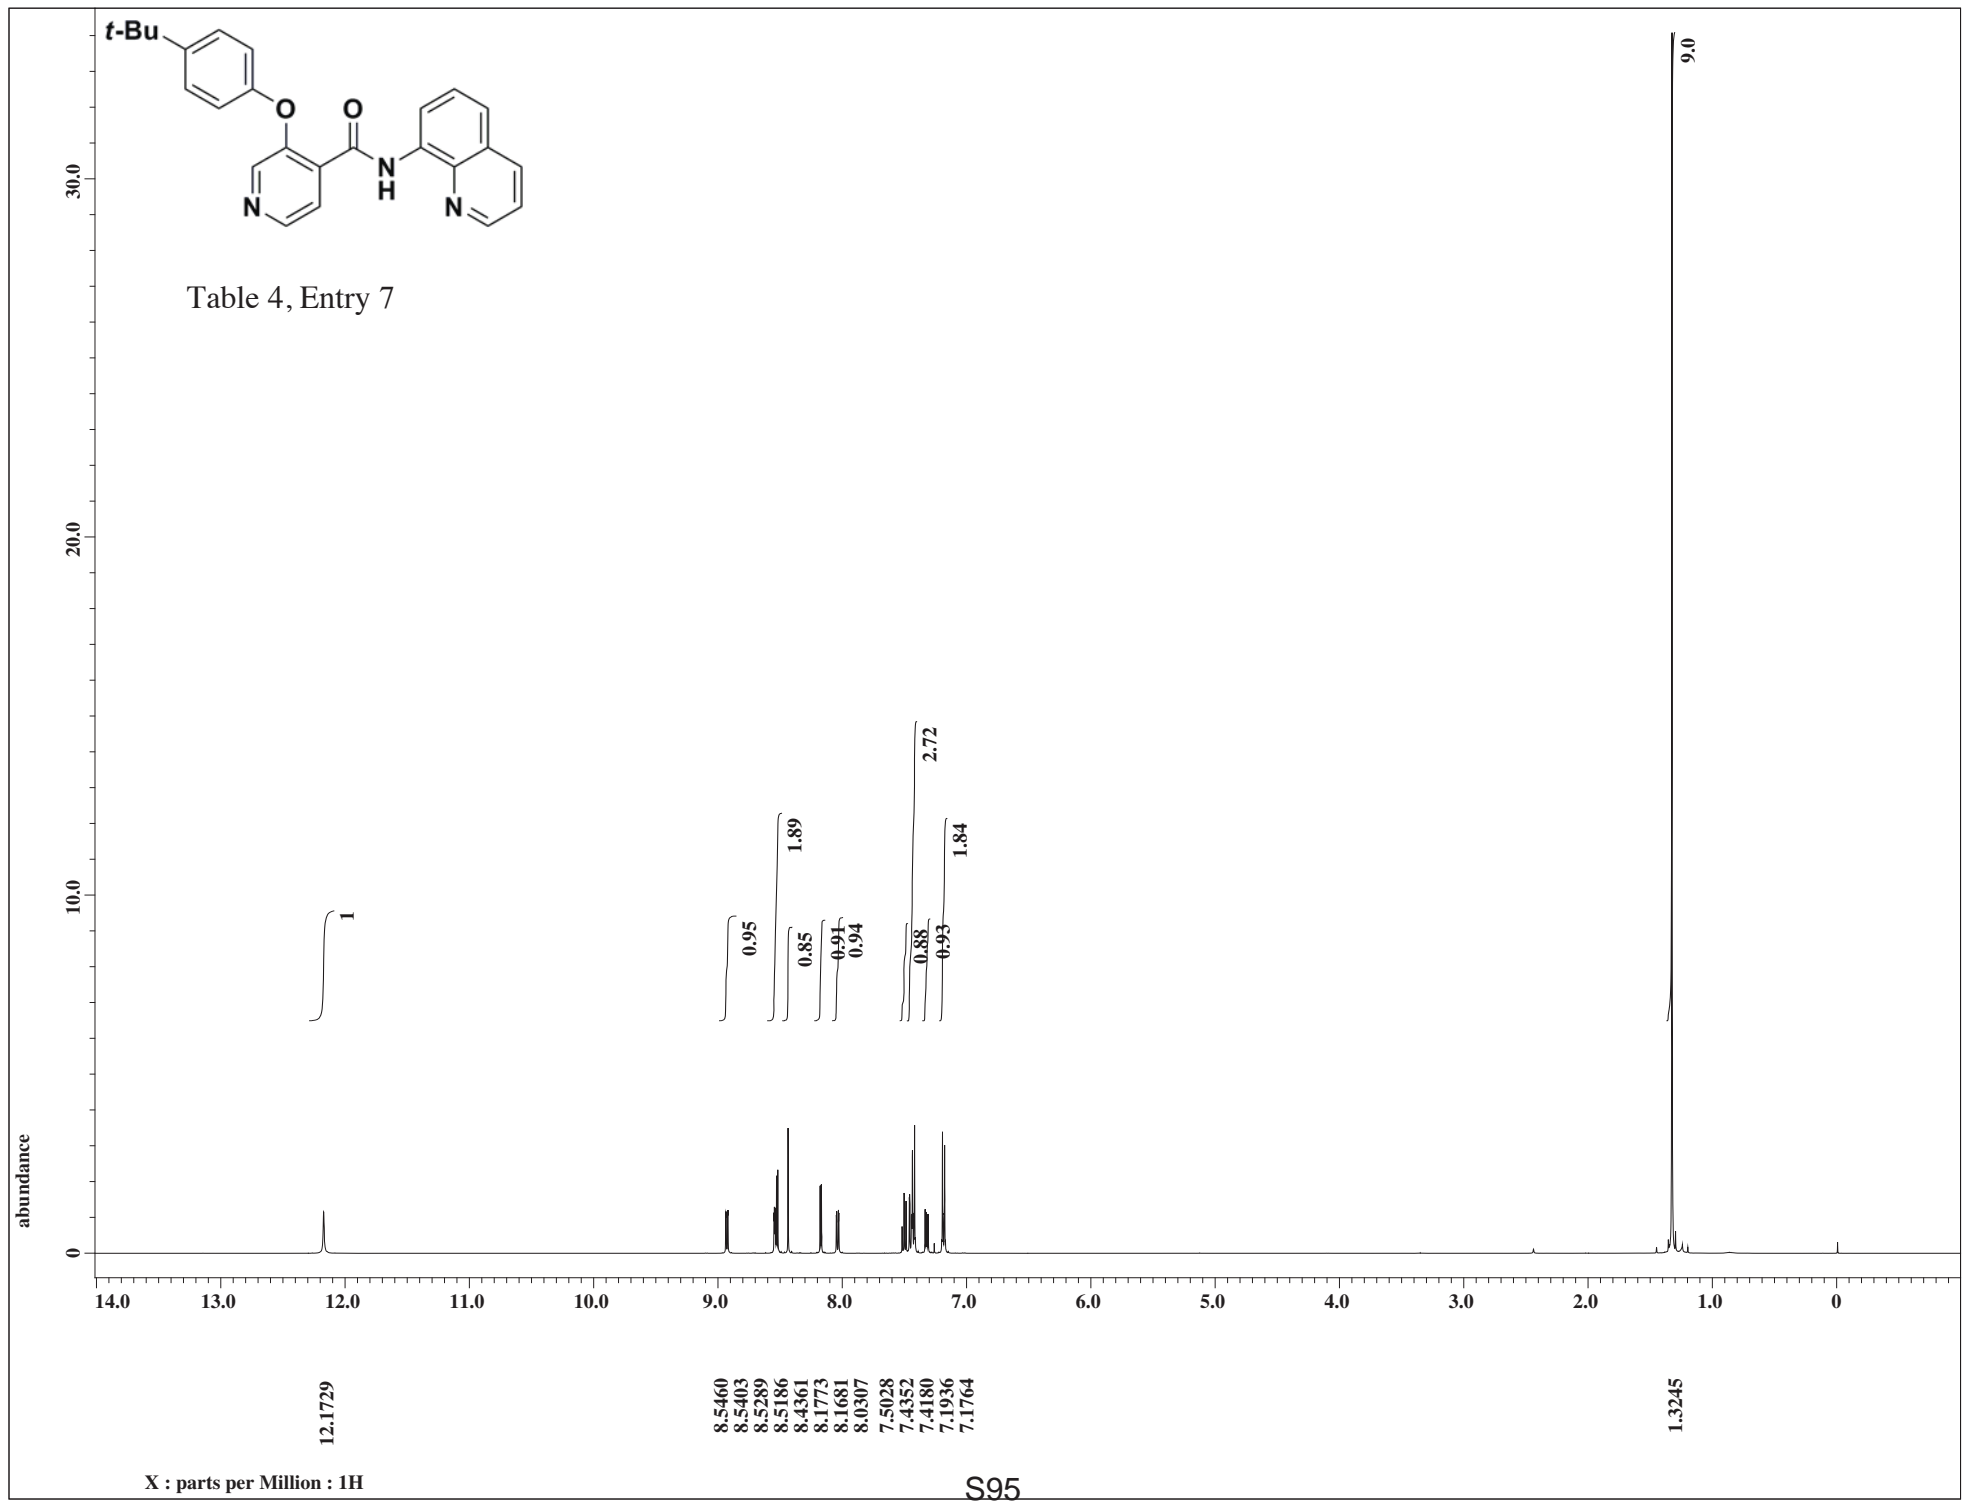

X : parts per Million : 1H

S95

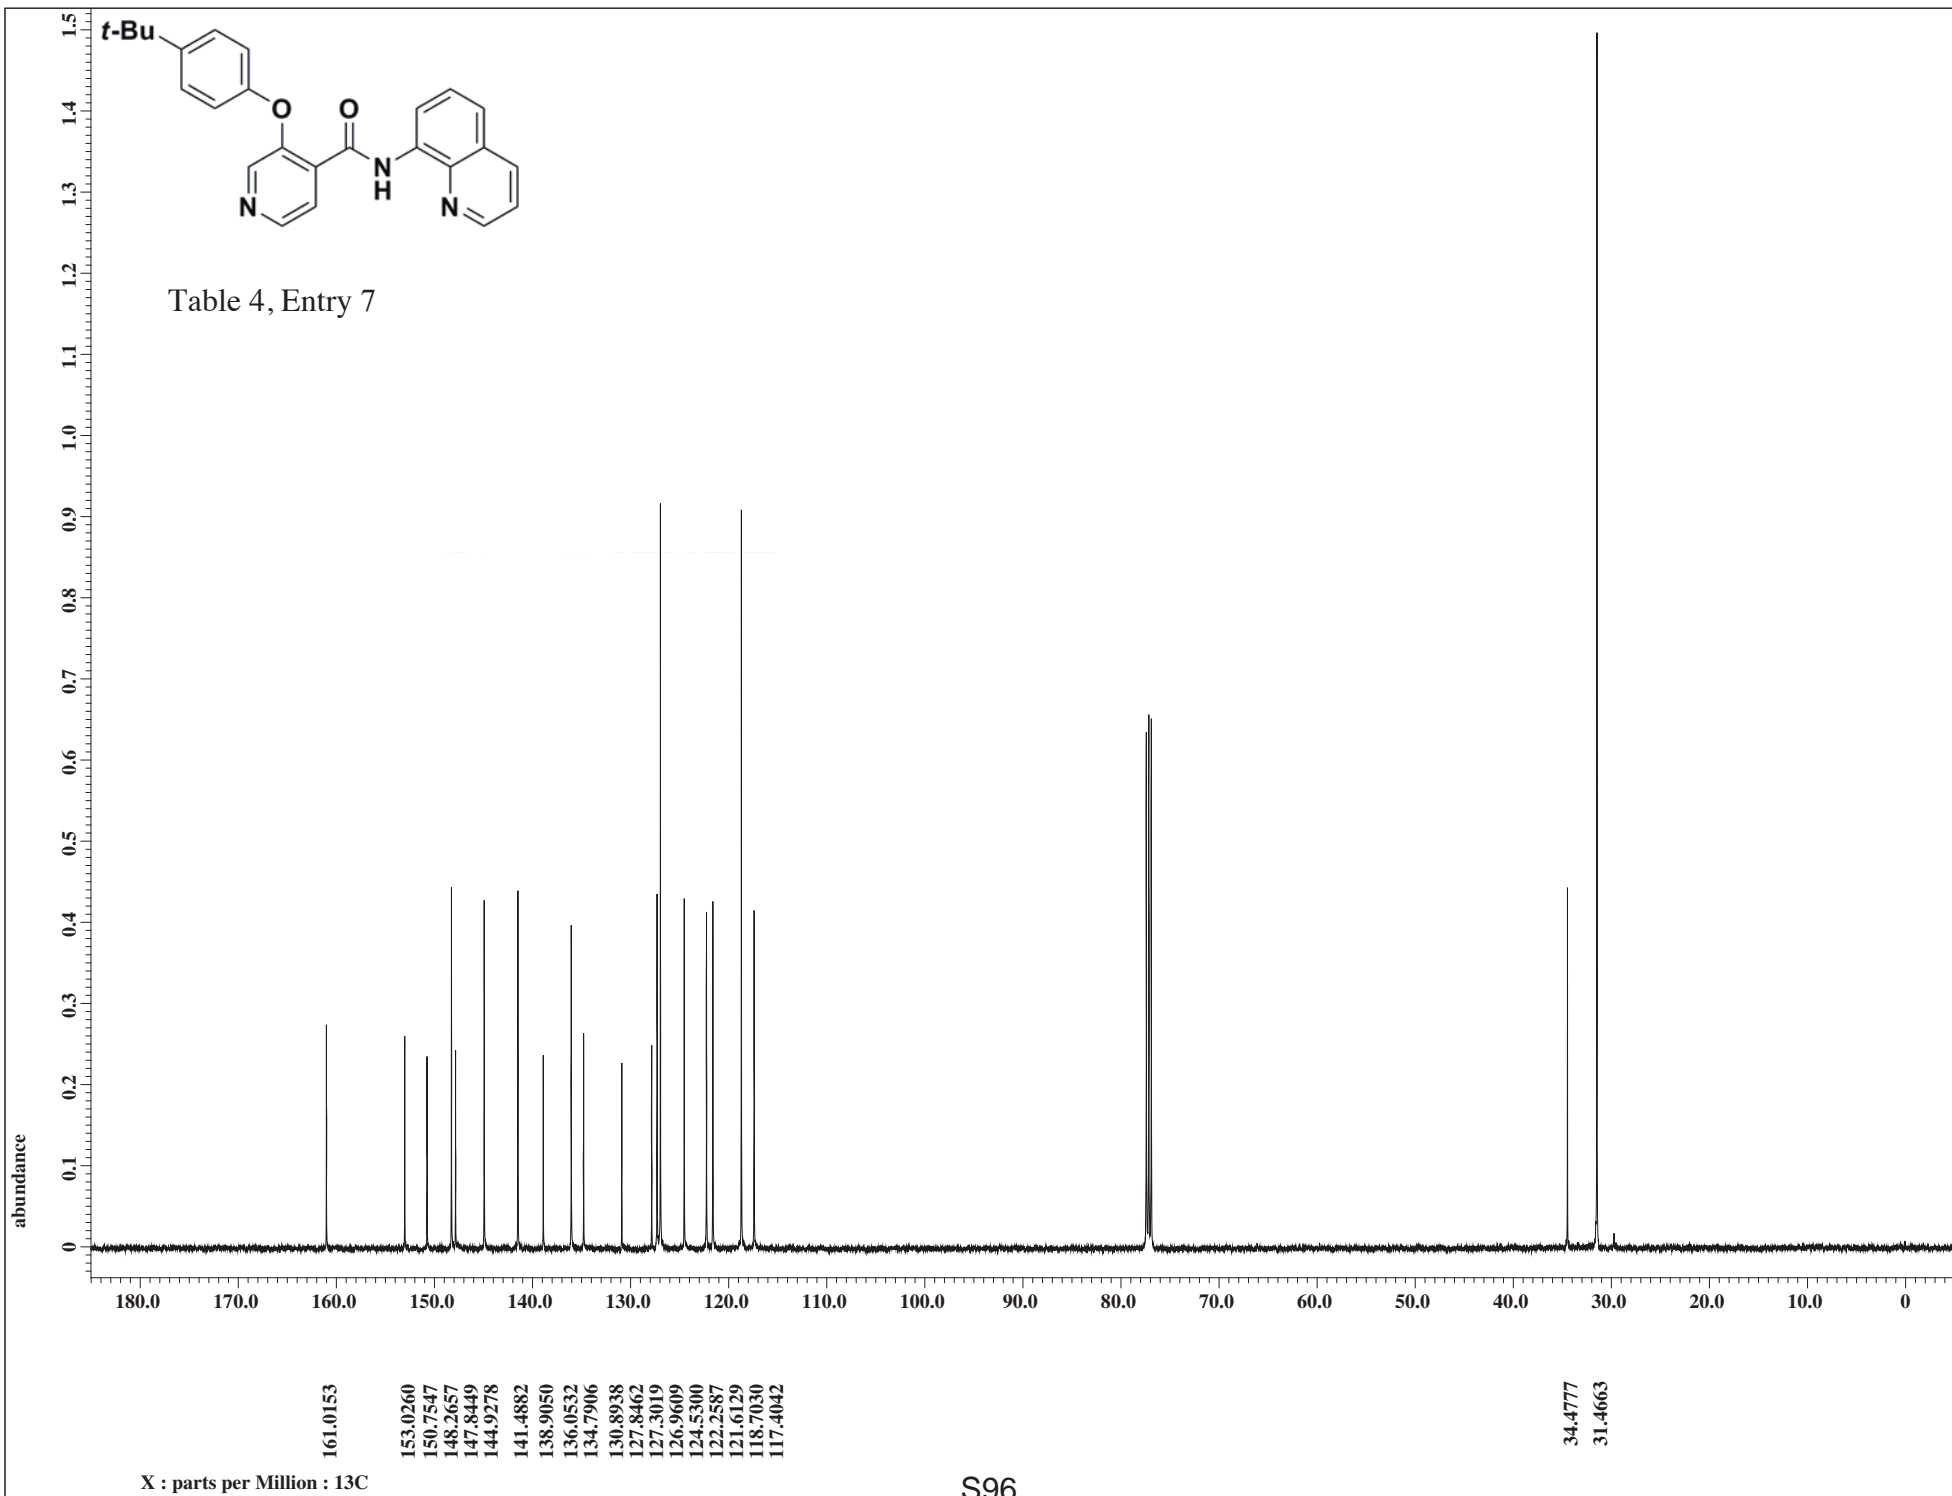



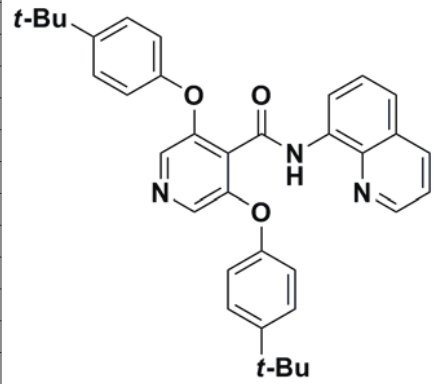

Table 4, Entry 8

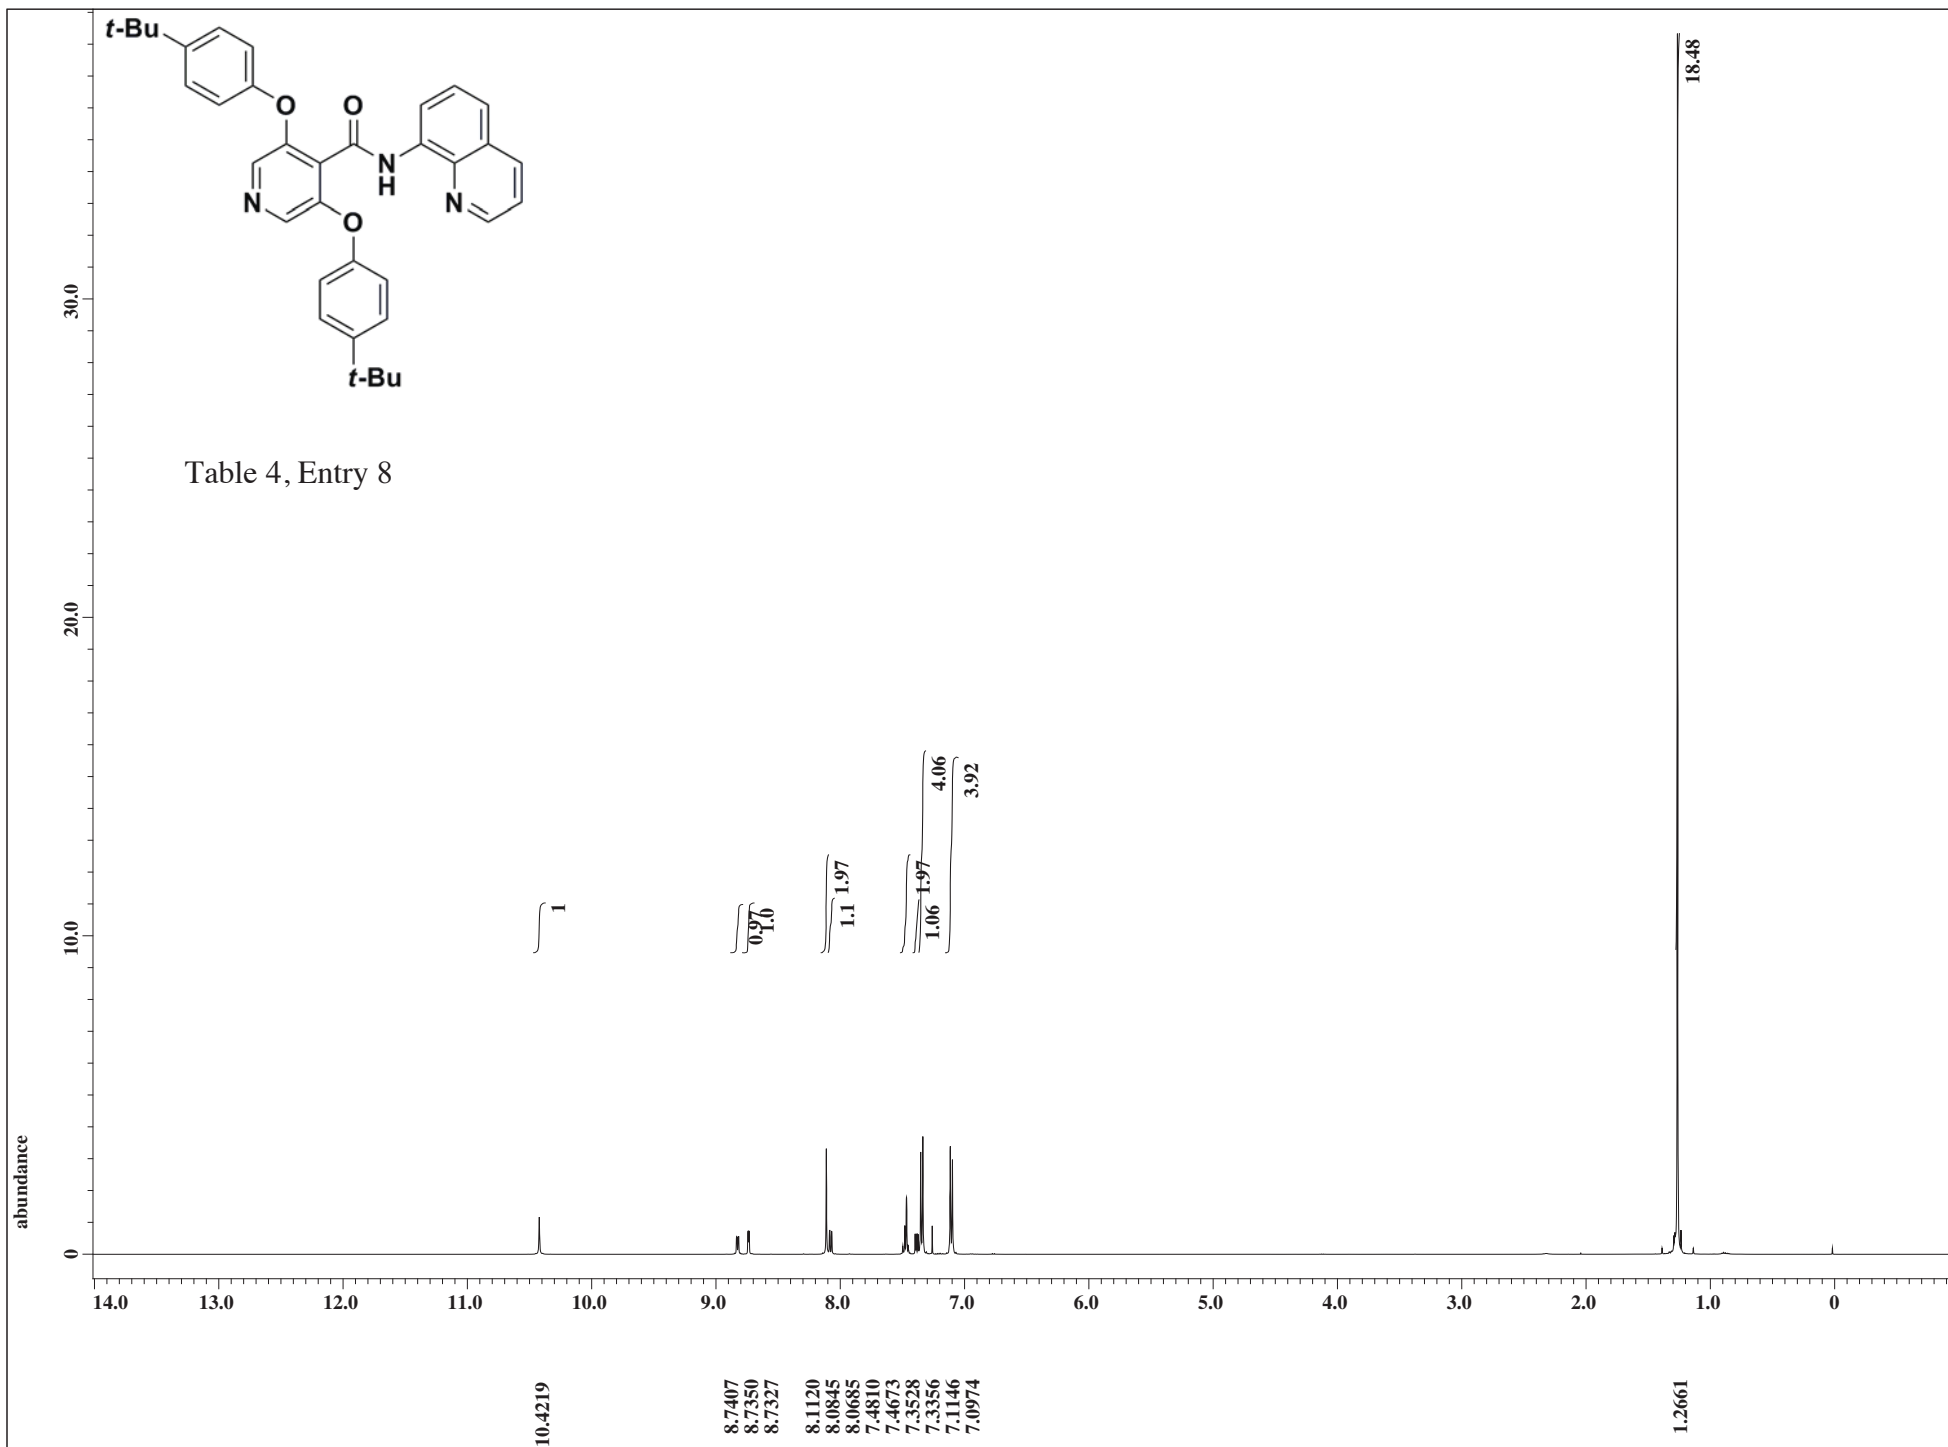

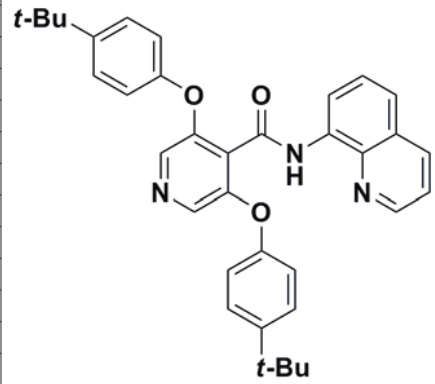

Table 4, Entry 8

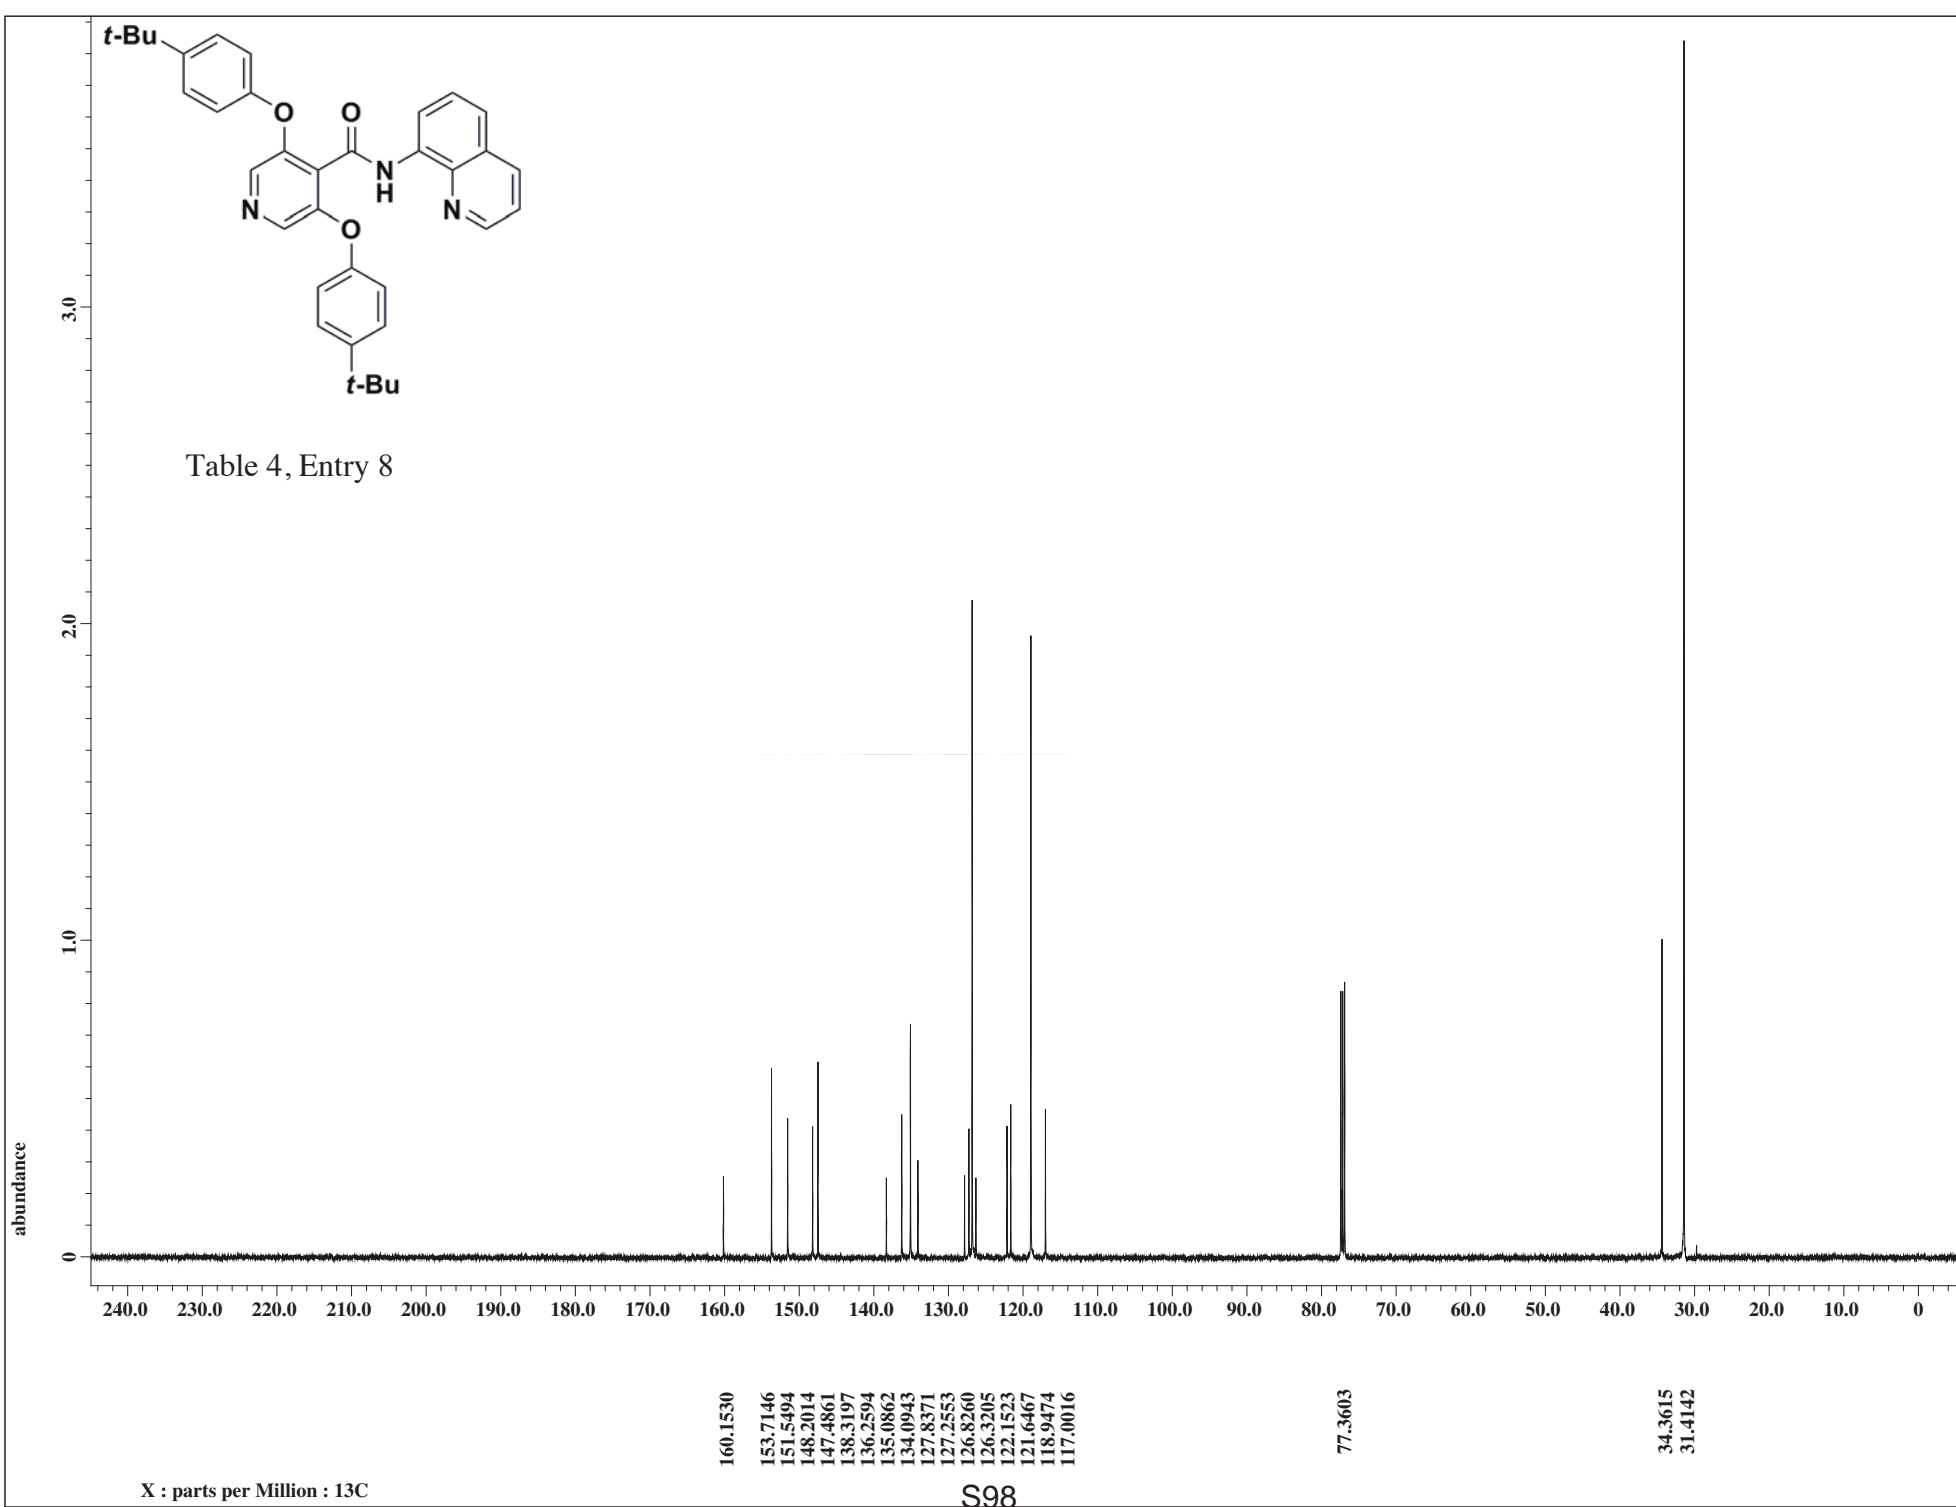

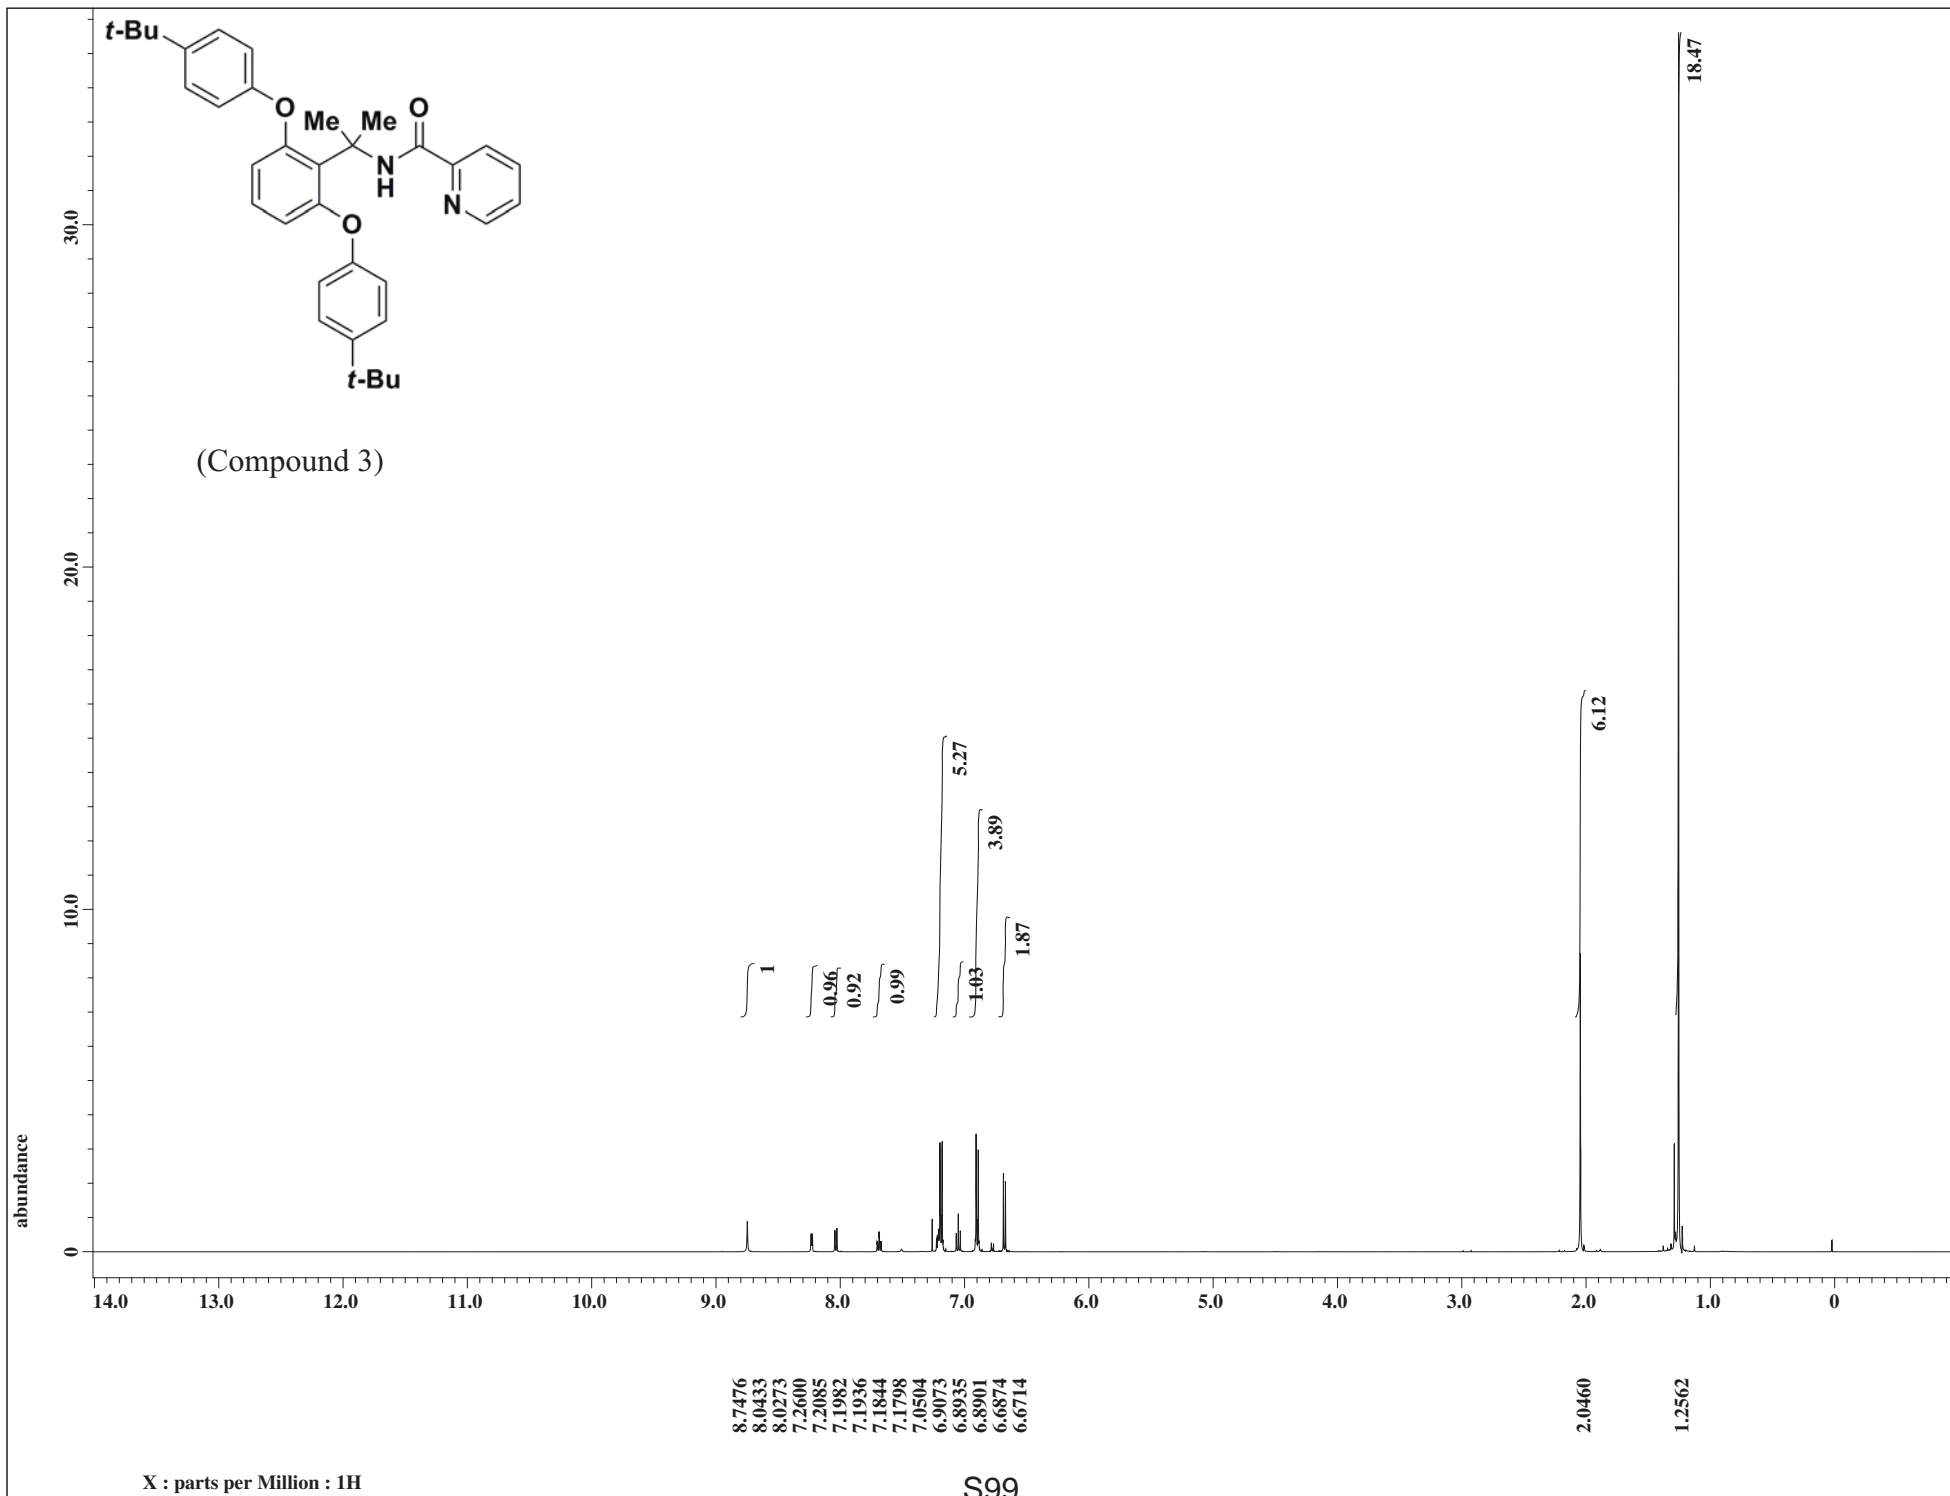

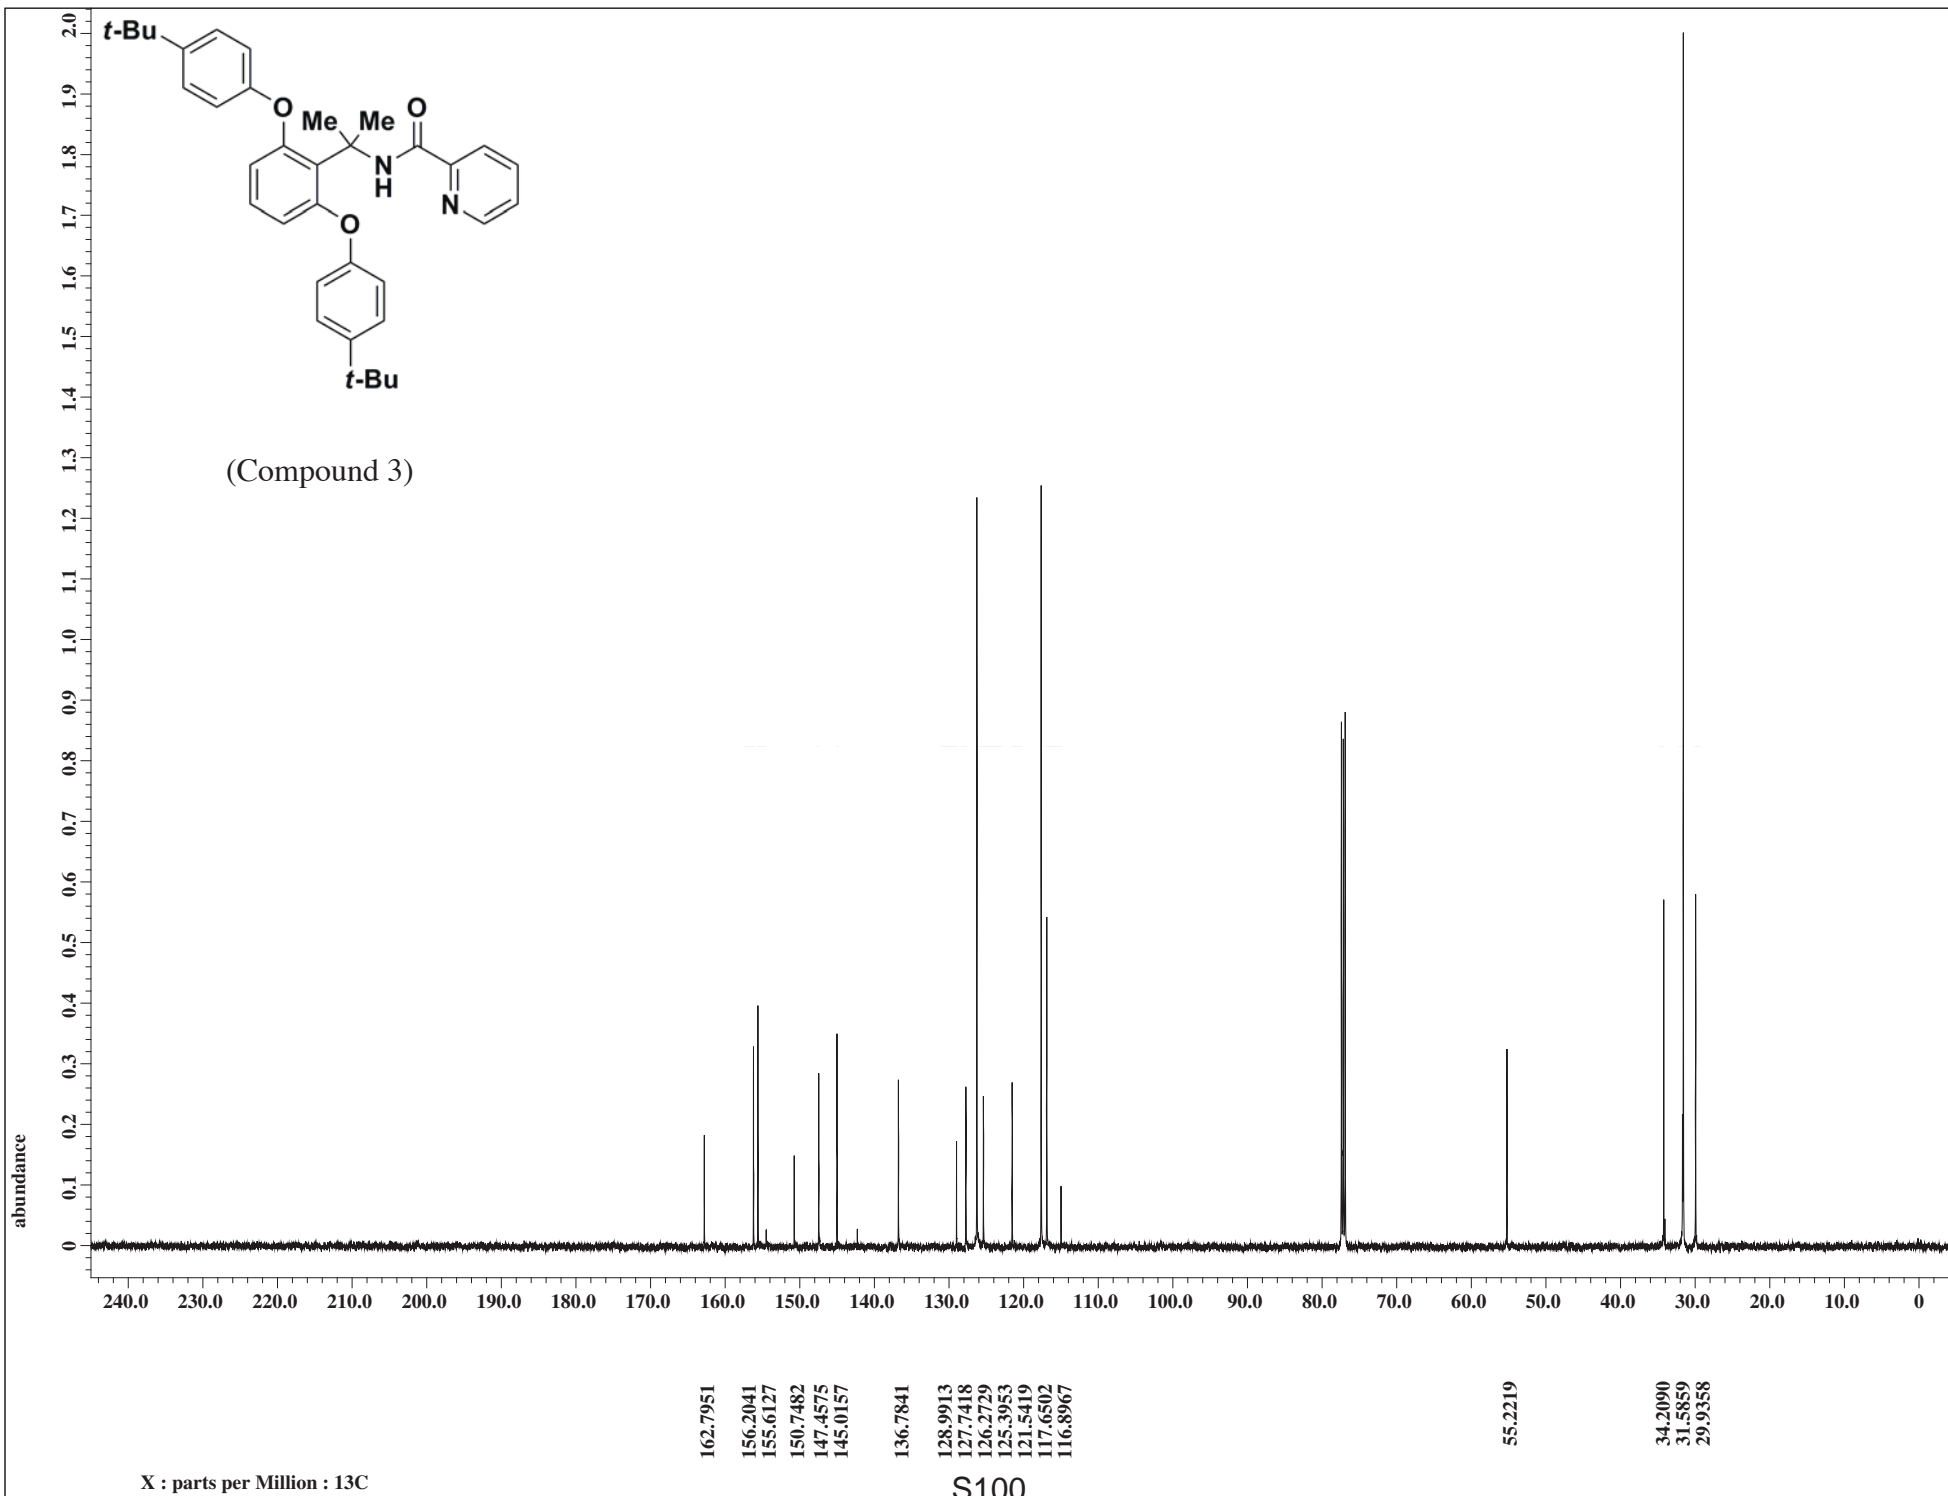

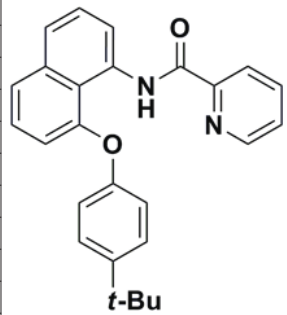

(Compound 4)

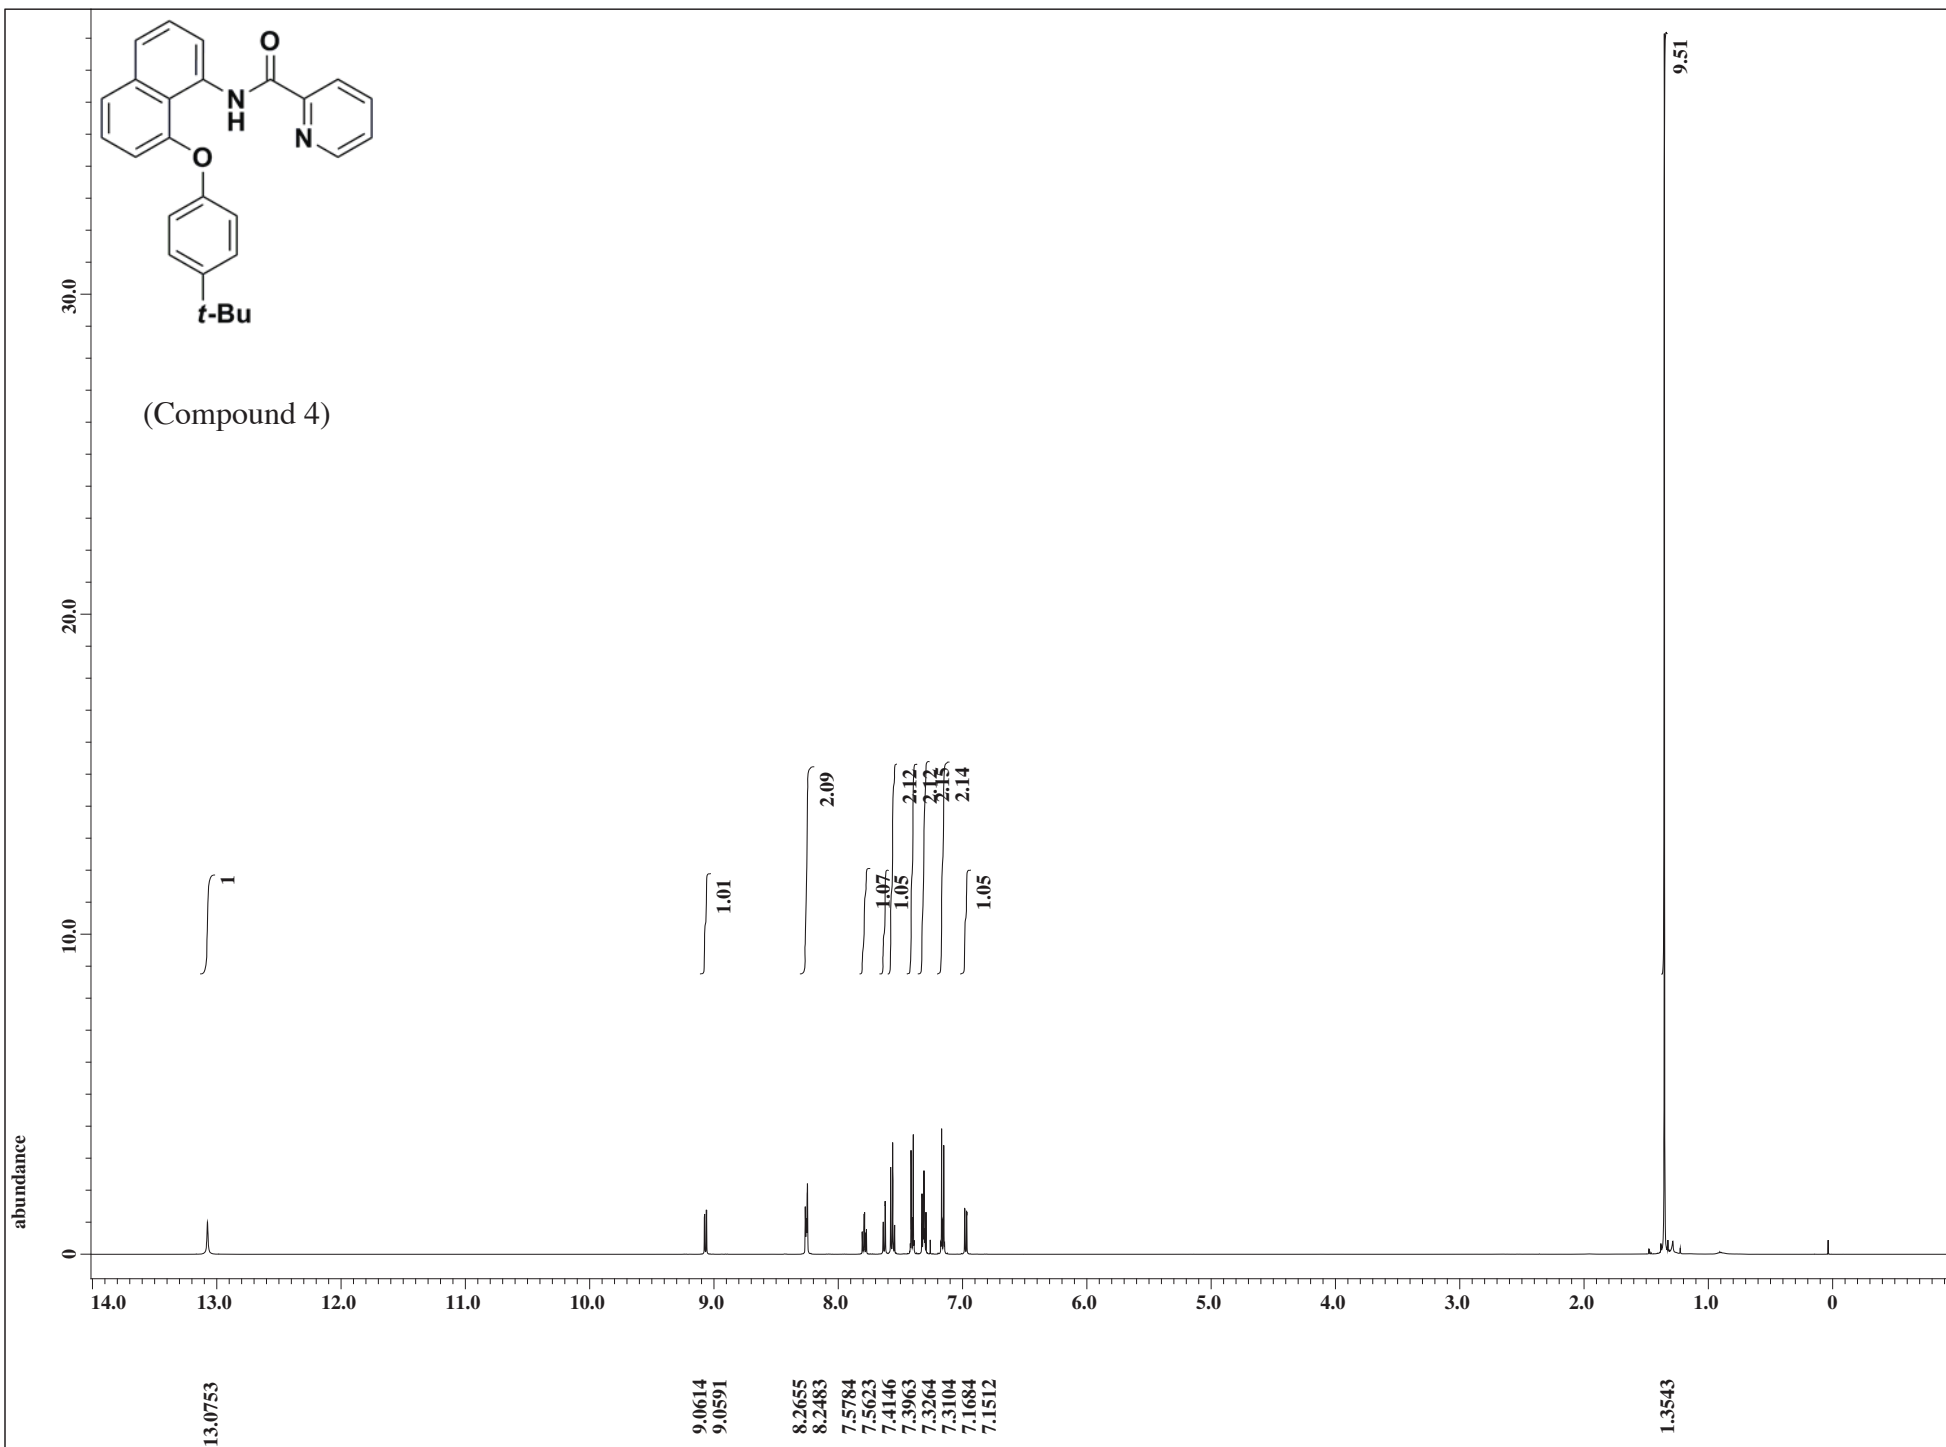

X : parts per Million : 1H

S101

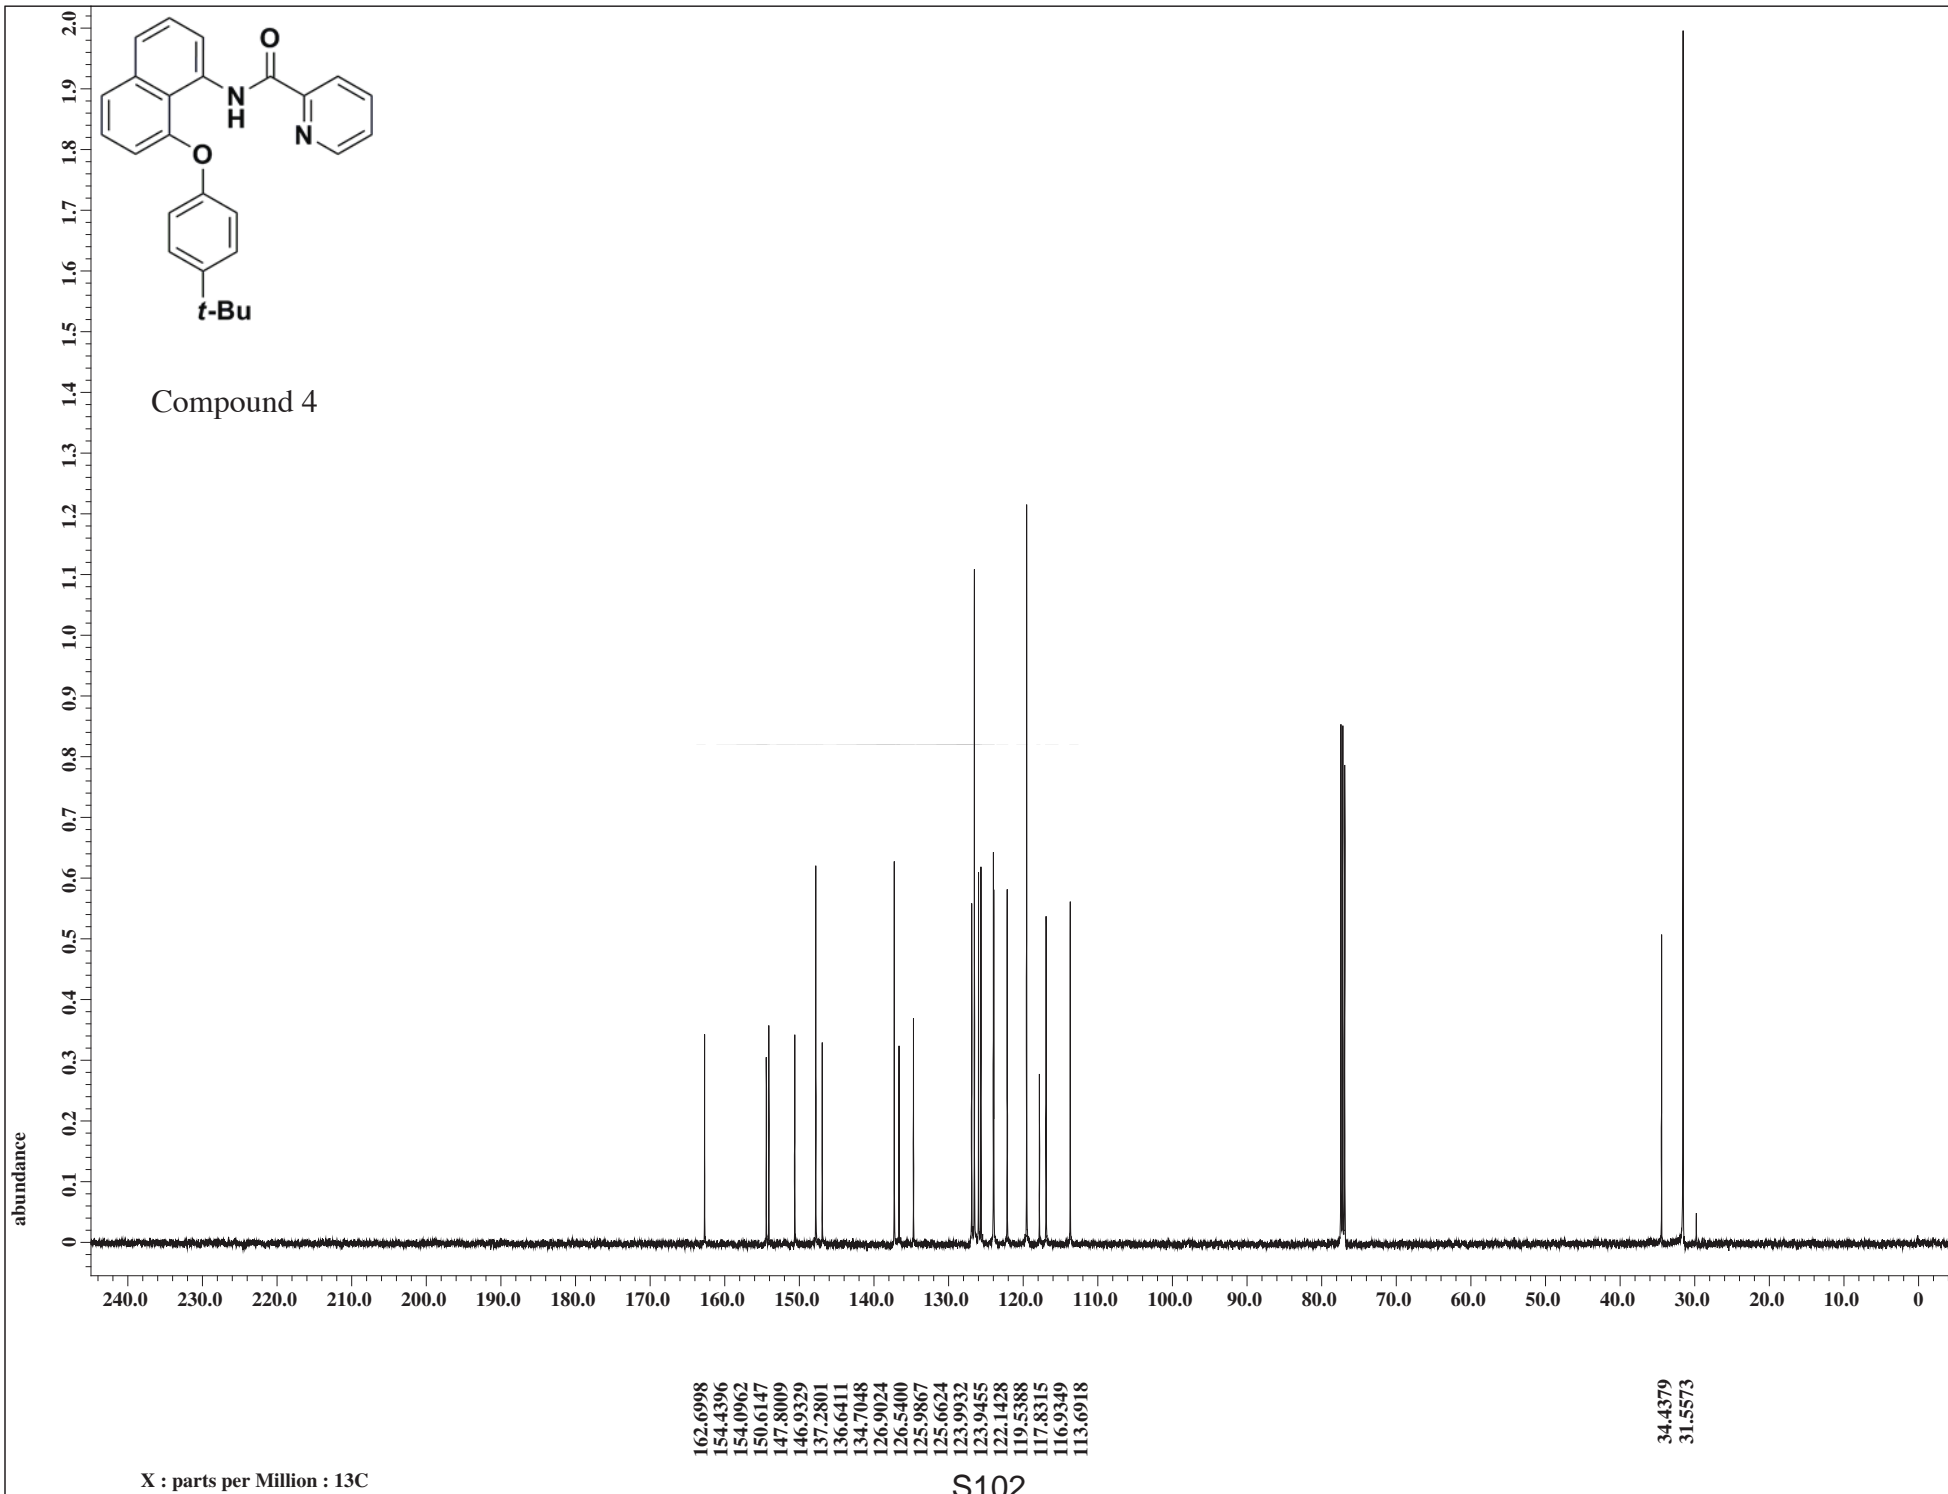

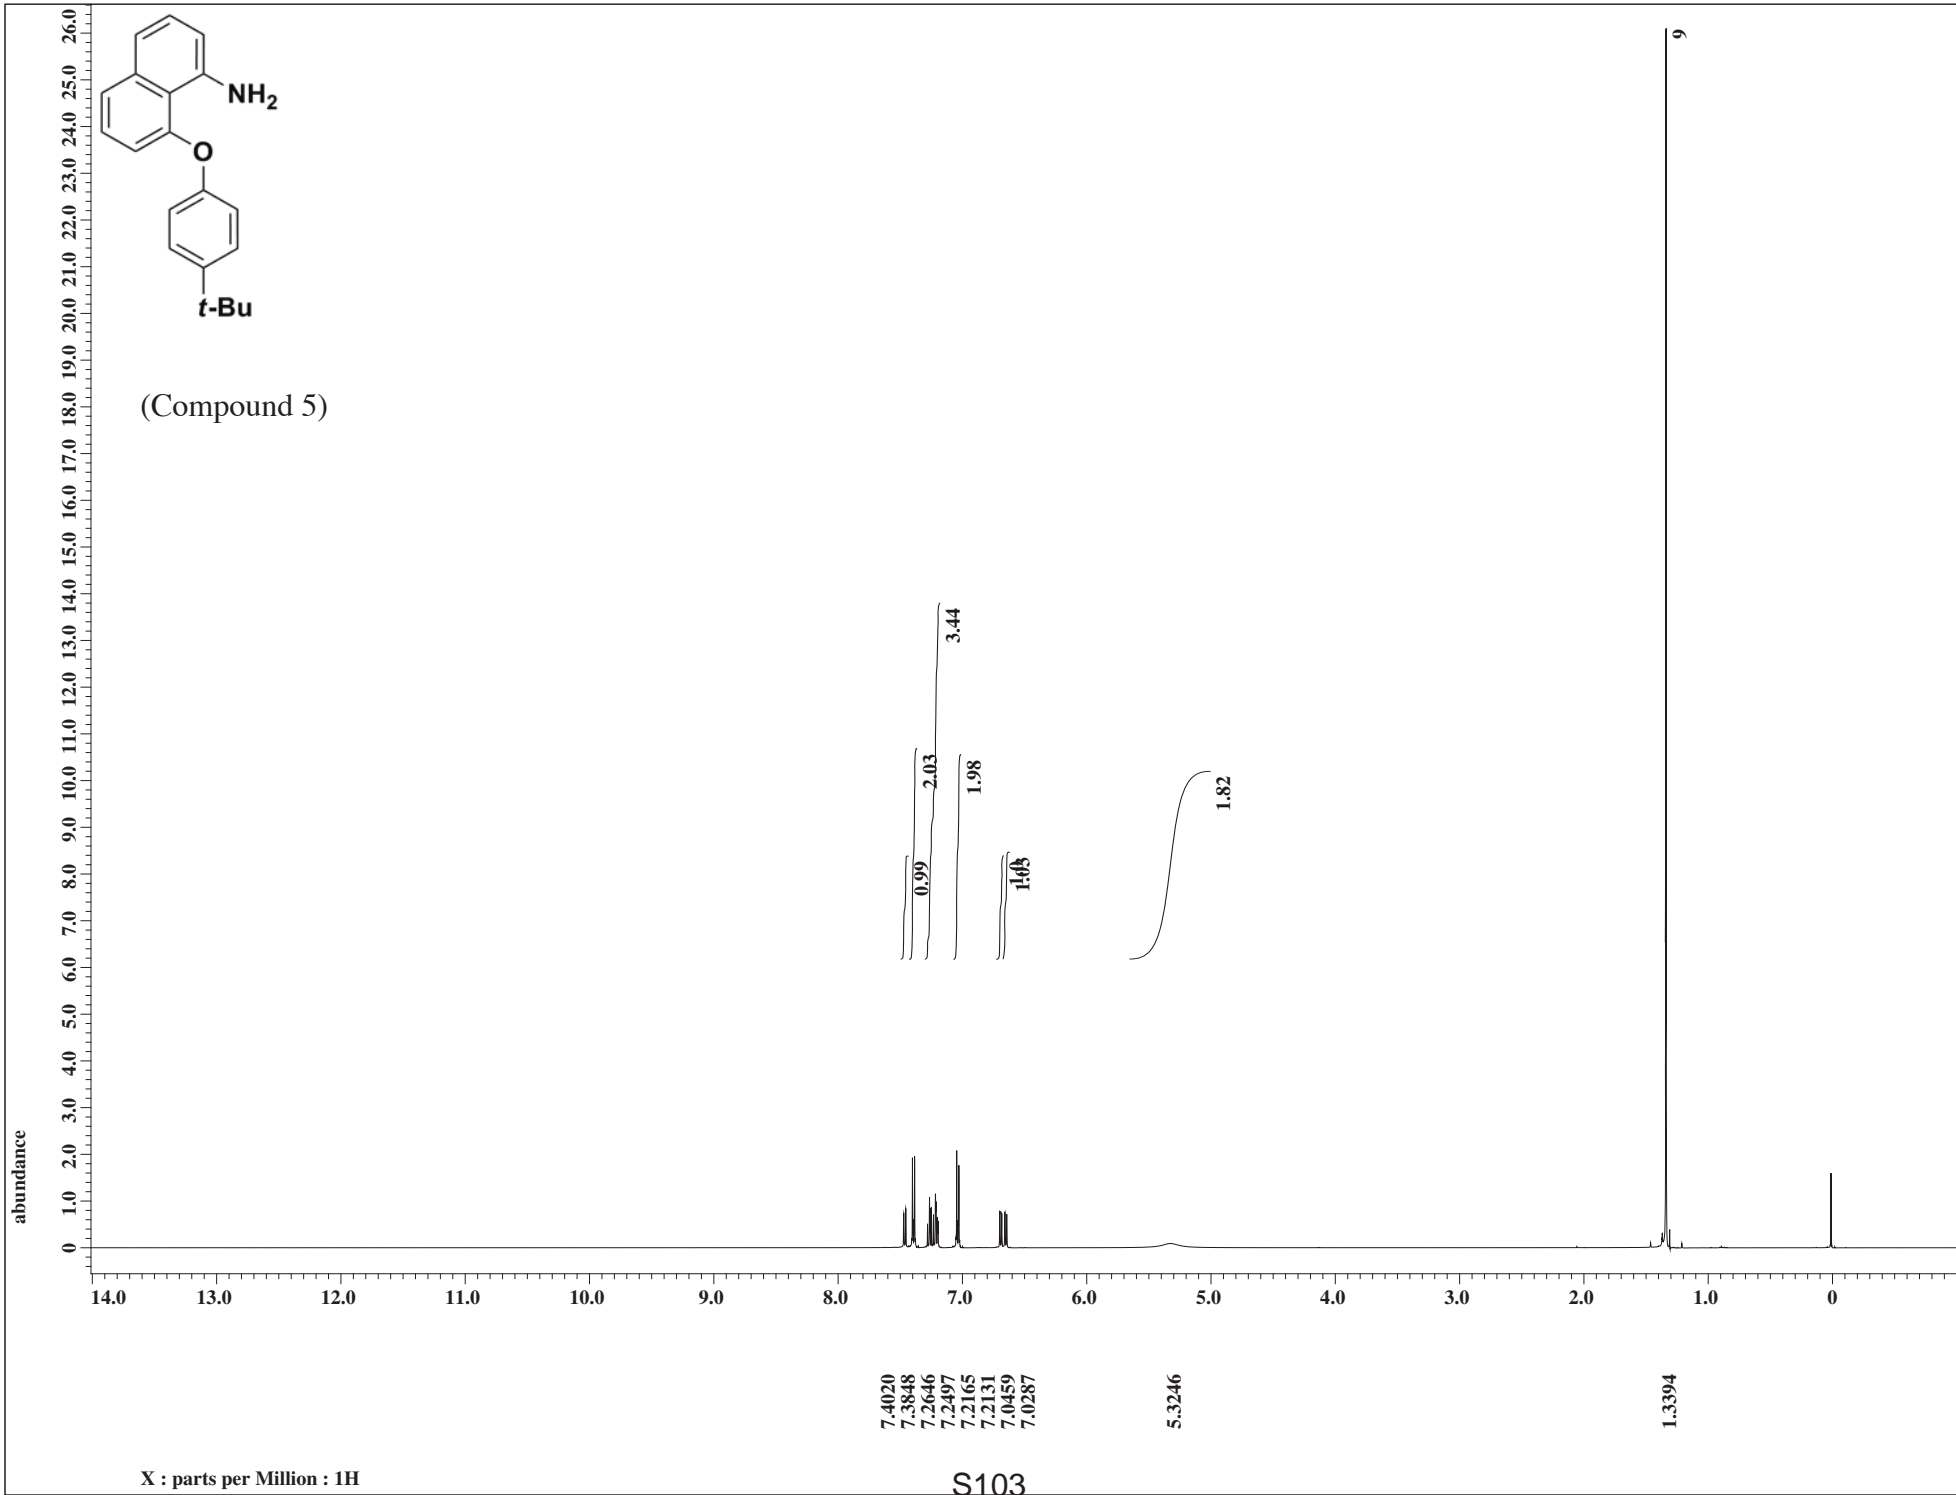

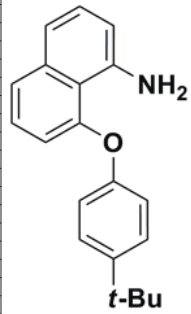

Compound 5

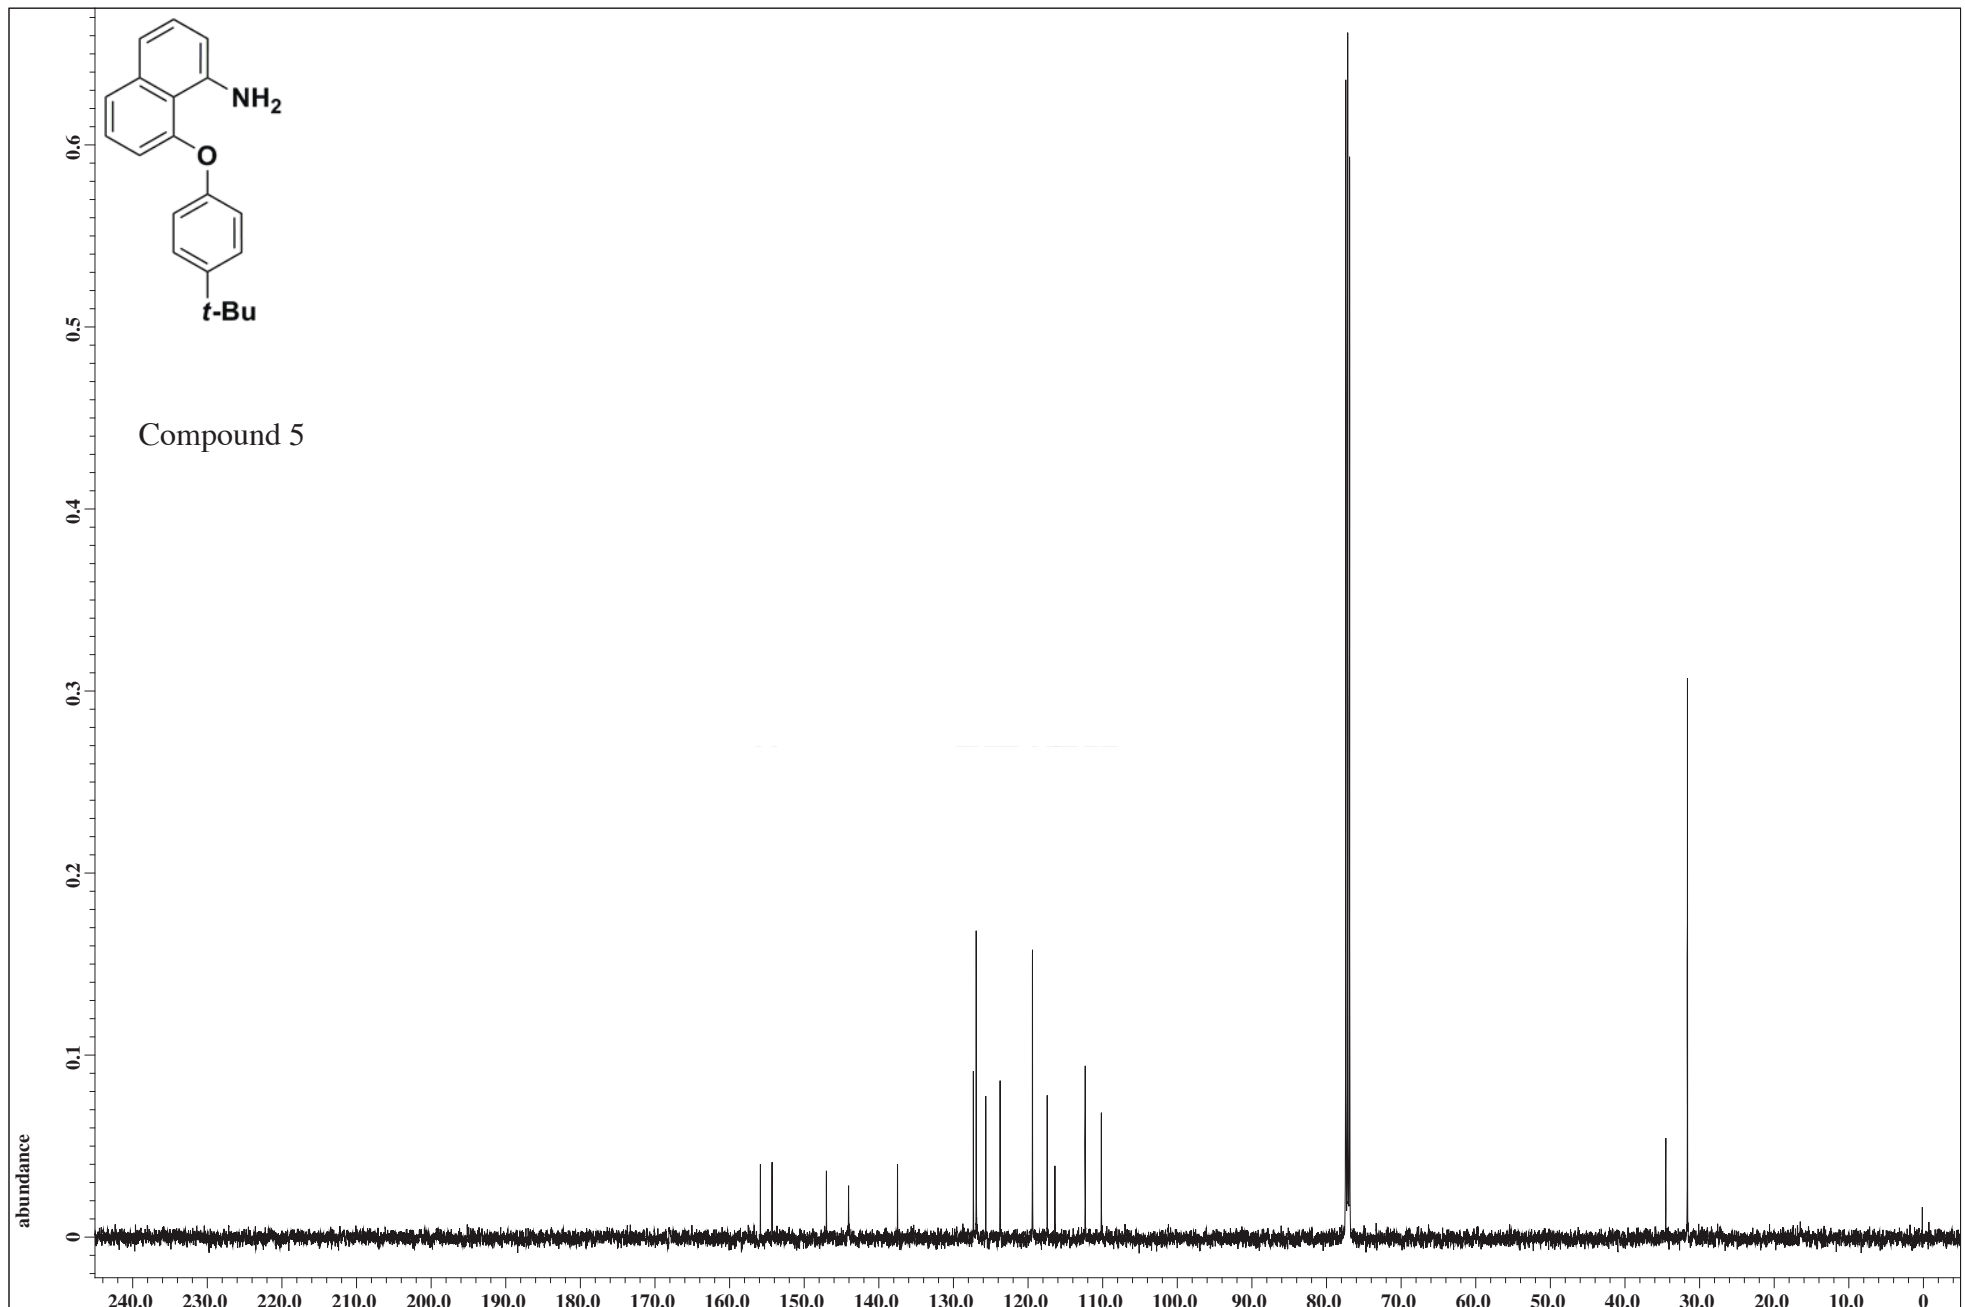

- 155.8703
- 154.3060
- 147.0188
- 144.0523
- 137.4995
- 127.3316
- 126.9501
- 125.6720
- 123.7452
- 119.4053
- 117.4309
- 116.4007
- 112.3374
- 110.1722
- 34.5237
- 31.6241

X : parts per Million : 13C

S104



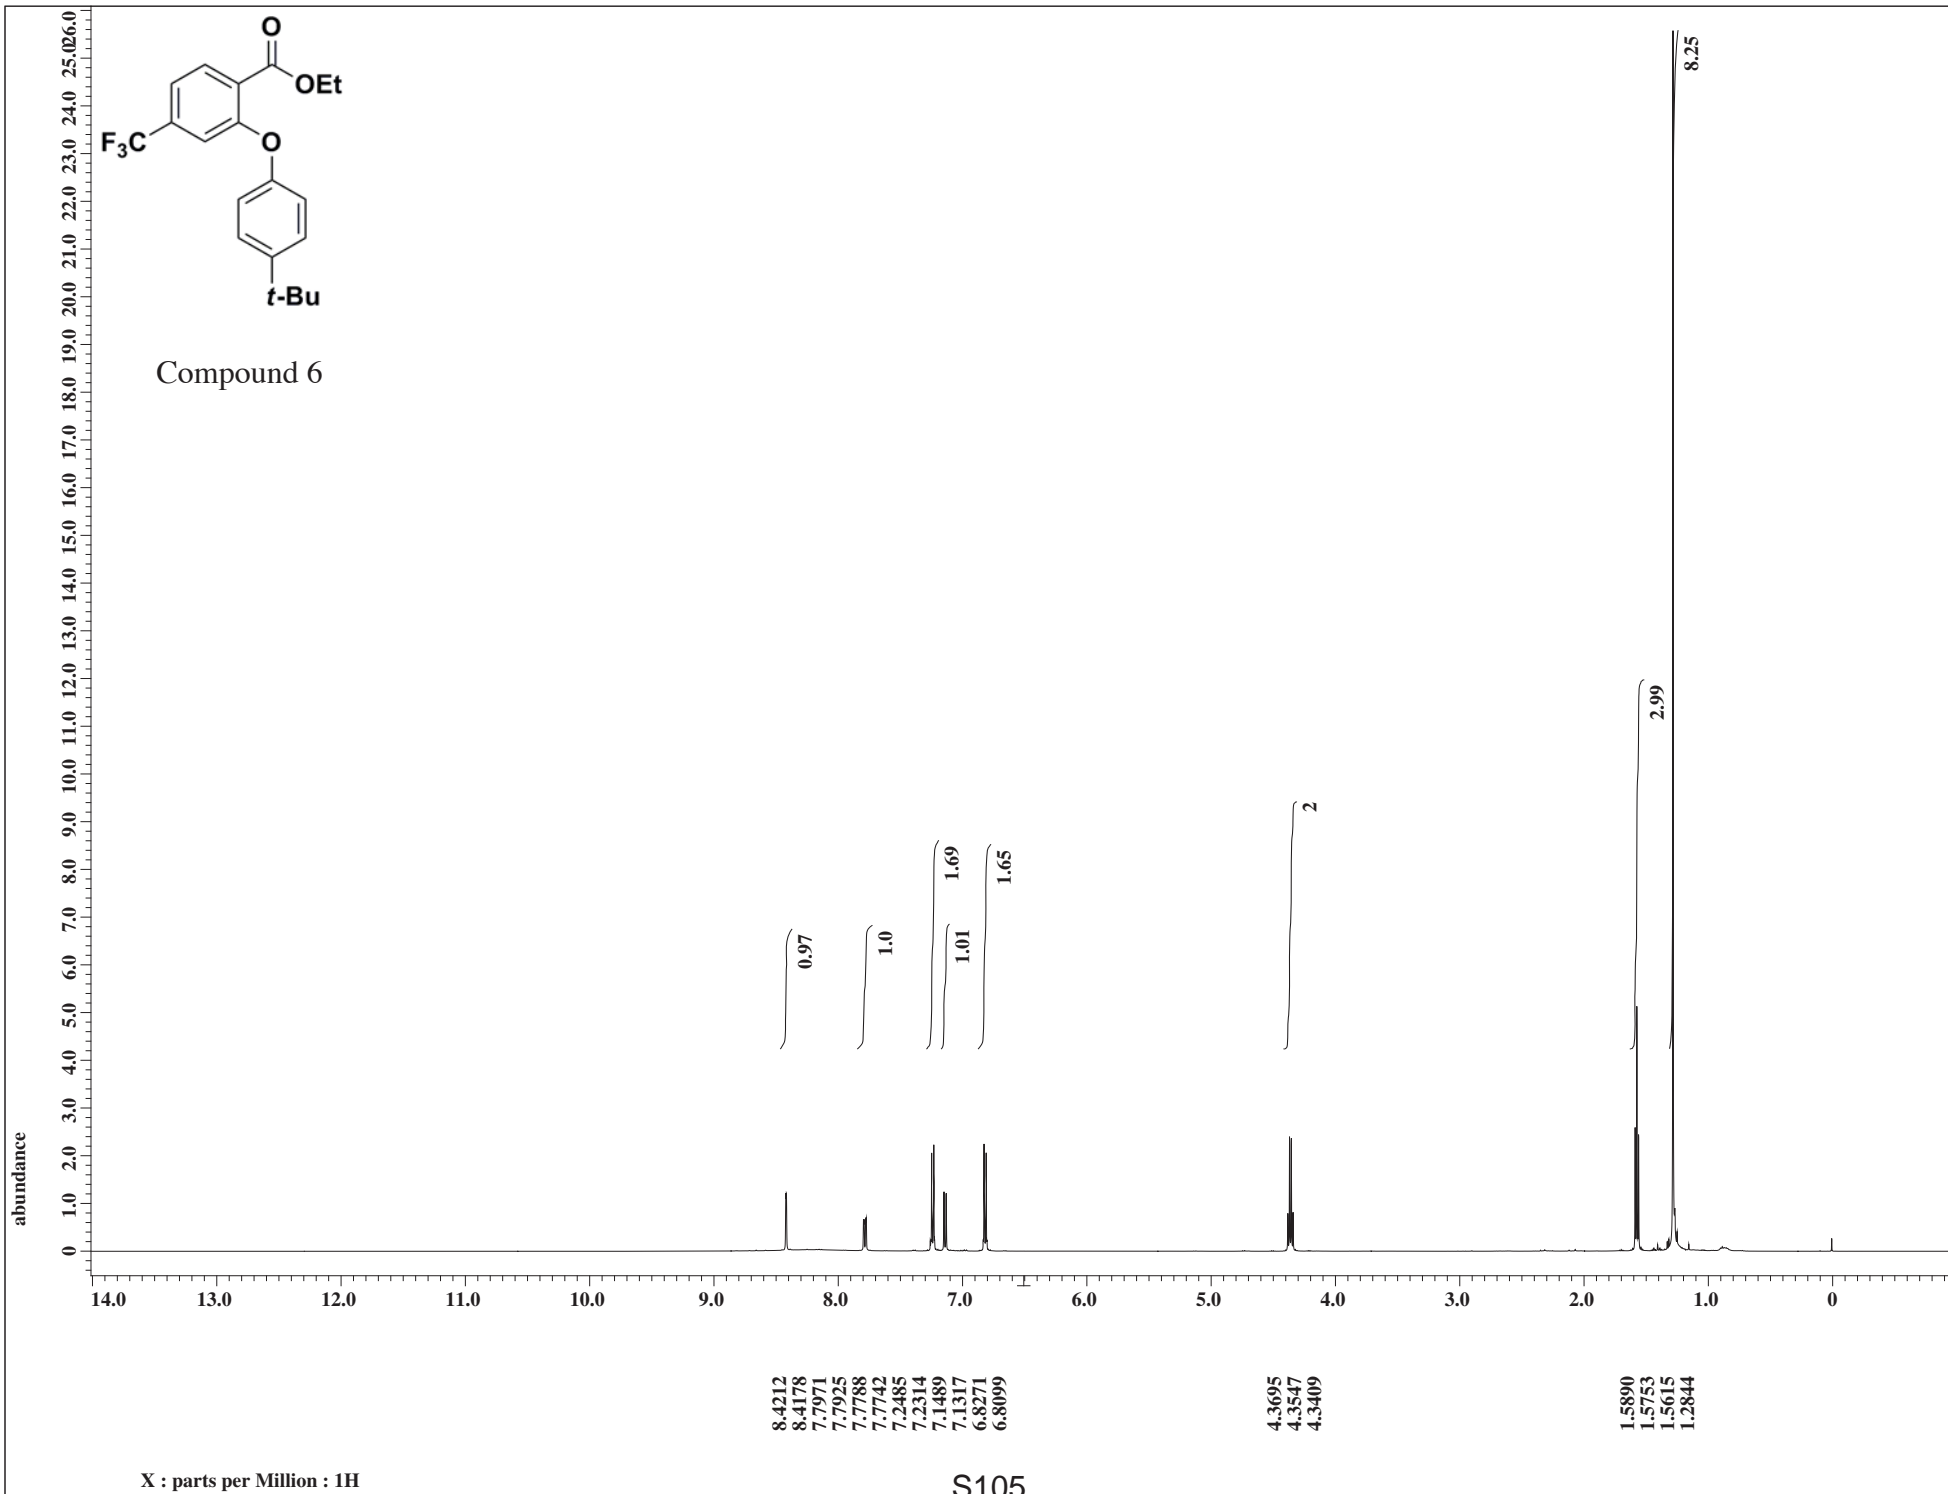

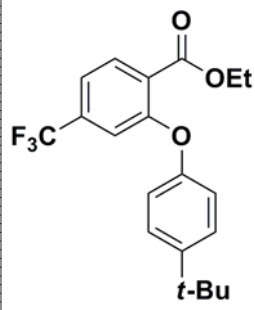

Compound 6

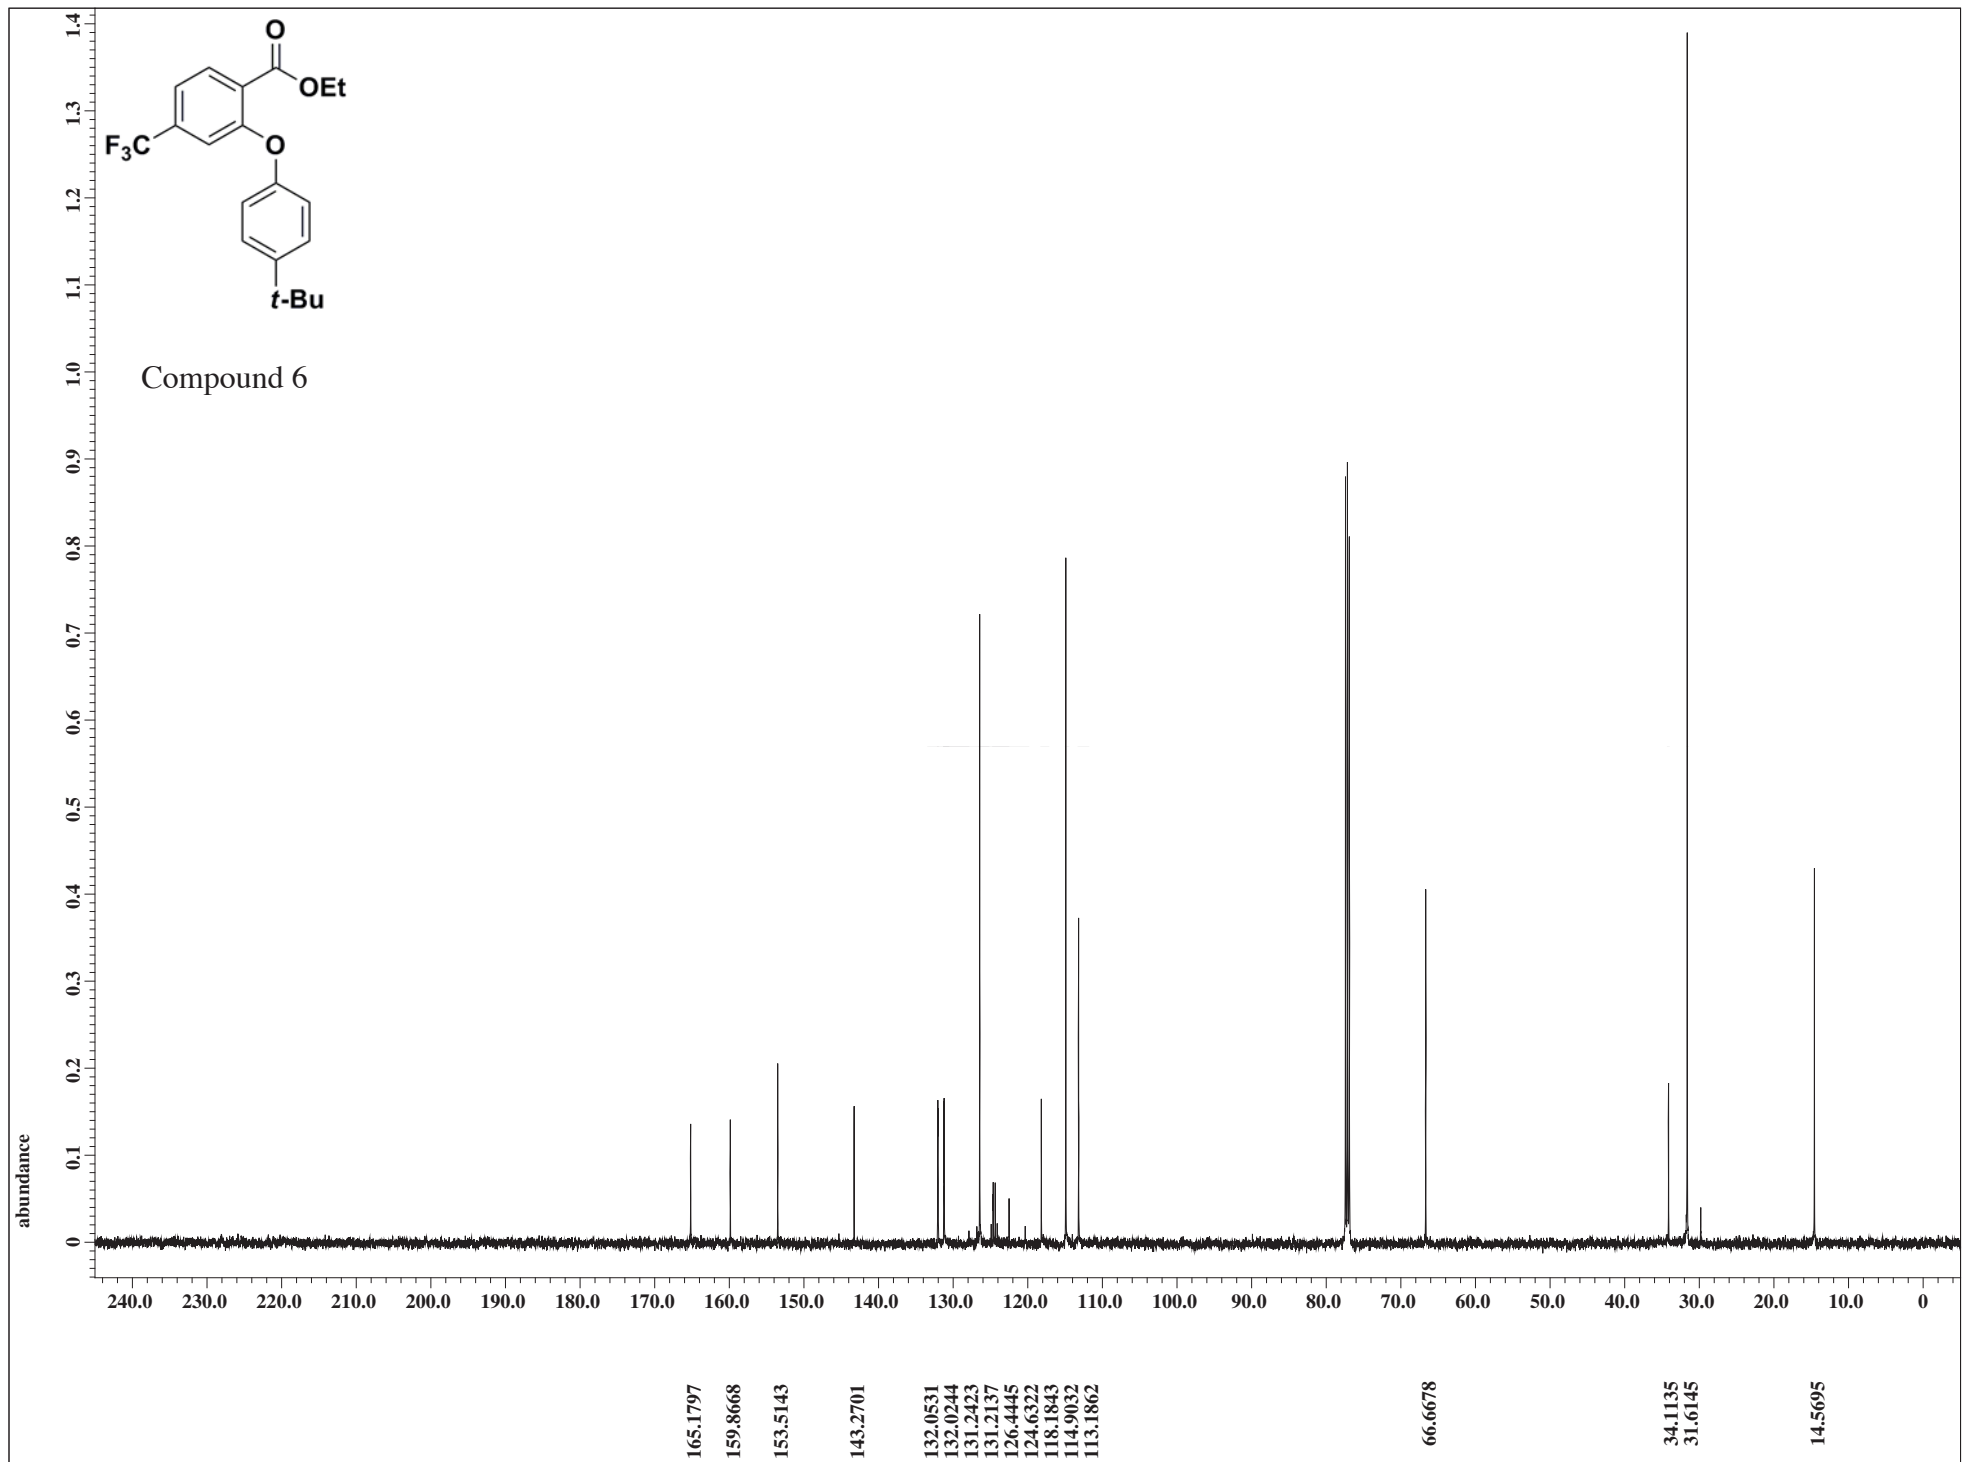

X : parts per Million : 13C

S106

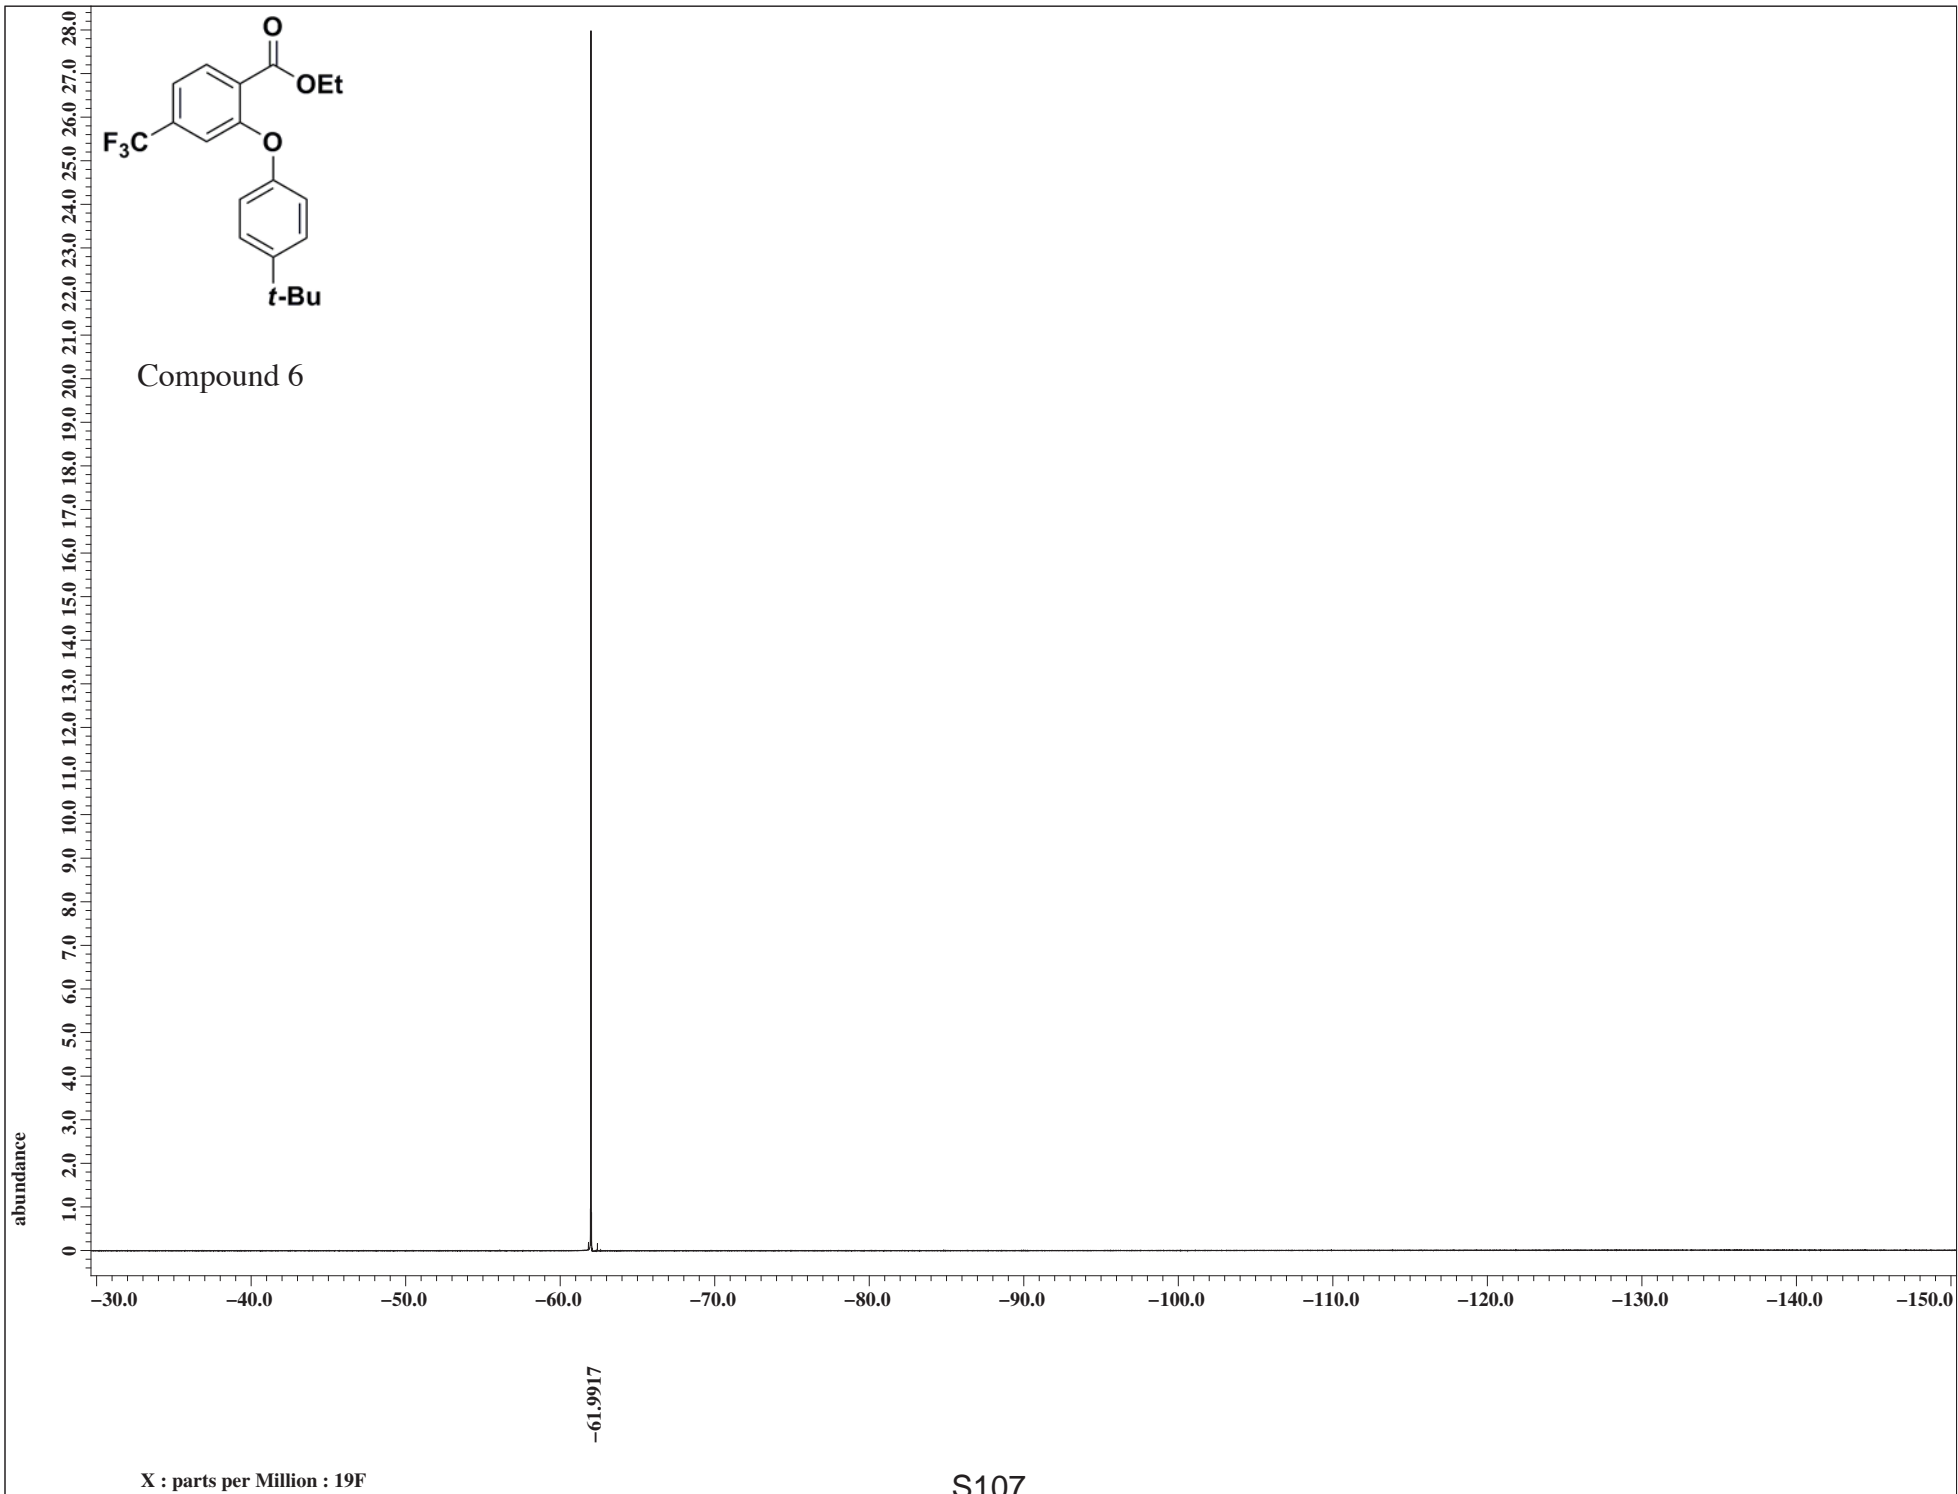

Supplement: NIHMS537547-supplement-1_si_001.pdf [file NIHMS537547-supplement-1_si_001.pdf]
